# Supplementary material for: RNA-directed activation of cytoplasmic dynein-1 in reconstituted transport RNPs
Source: eLife journal article supplement (doi:10.7554/elife.36312), 2018-06-26
Supplement: supp [file elife-36312-supp-v1.zip]

Archive with 43 entries (43 files):
- elife_poa_e36312_Figure_7_figure_supplement_2_source_data_1.xlsx
- elife_poa_e36312_Figure_6_figure_supplement_4.pdf
- elife_poa_e36312_Figure_1_figure_supplement_3.pdf
- elife_poa_e36312_Figure_7_figure_supplement_2.pdf
- elife_poa_e36312_Figure_6_figure_supplement_1_source_data_1.xlsx
- elife_poa_e36312_Figure_2_figure_supplement_2.pdf
- elife_poa_e36312_Figure_7_figure_supplement_3_source_data_1.xlsx
- elife_poa_e36312_Transparent_Reporting_File.pdf
- elife_poa_e36312_Figure_3_figure_supplement_1.pdf
- elife_poa_e36312_Figure_1_figure_supplement_1.pdf
- elife_poa_e36312_Figure_1_source_data_1.xlsx
- elife_poa_e36312_Figure_4_figure_supplement_1_source_data_1.xlsx
- elife_poa_e36312_Figure_7_figure_supplement_3.pdf
- elife_poa_e36312_Figure_5_figure_supplement_1.pdf
- elife_poa_e36312_Figure_6_figure_supplement_5.pdf
- elife_poa_e36312_Figure_6_figure_supplement_4_source_data_1.xlsx
- elife_poa_e36312_Figure_3_source_data_1.xlsx
- elife_poa_e36312_Figure_6_figure_supplement_5_source_data_1.xlsx
- elife_poa_e36312_Figure_4_figure_supplement_1.pdf
- elife_poa_e36312_Figure_5_source_data_1.xlsx
- elife_poa_e36312_Figure_3_figure_supplement_1_source_data_1.xlsx
- elife_poa_e36312_Figure_6_figure_supplement_2.pdf
- elife_poa_e36312_Figure_6_source_data_1.xlsx
- elife_poa_e36312_Figure_2_figure_supplement_1.pdf
- elife_poa_e36312_Supplementary_File_1.docx
- elife_poa_e36312_Figure_1_figure_supplement_2.pdf
- elife_poa_e36312_Figure_7_figure_supplement_1_source_data_1.xlsx
- elife_poa_e36312_Figure_1_figure_supplement_4.pdf
- elife_poa_e36312_Figure_6_figure_supplement_2_source_data_1.xlsx
- elife_poa_e36312_Figure_7_figure_supplement_1.pdf
- elife_poa_e36312_Figure_4_figure_supplement_2.pdf
- elife_poa_e36312_Video_1.mov
- elife_poa_e36312_Figure_6_figure_supplement_1.pdf
- elife_poa_e36312_Figure_1_figure_supplement_2_source_data_1.xlsx
- elife_poa_e36312_Figure_7_source_data_1.xlsx
- elife_poa_e36312_Figure_5_figure_supplement_1_source_data_1.xlsx
- elife_poa_e36312_Supplementary_File_3.docx
- elife_poa_e36312_Figure_4_figure_supplement_2_source_data_1.xlsx
- elife_poa_e36312_Figure_6_figure_supplement_3.pdf
- elife_poa_e36312_Supplementary_File_2.docx
- elife_poa_e36312_Figure_4_source_data_1.xlsx
- elife_poa_e36312_Figure_6_figure_supplement_3_source_data_1.xlsx
- elife_poa_e36312_Figure_2_source_data_1.xlsx
