# Supplementary material for: RNA-directed activation of cytoplasmic dynein-1 in reconstituted transport RNPs
Source: eLife journal article supplement (doi:10.7554/elife.36312), 2018-06-26
Supplement: supp [file elife-36312-supp-v1.zip › elife_poa_e36312_Figure_1_figure_supplement_1.pdf]

|            |     |                                                        |     |
|------------|-----|--------------------------------------------------------|-----|
| Human      | 761 | LDEMQRQLAAAEDEKKTLSLLRMAIQQKLALTQRLELLELD              | 802 |
| Mouse      | 757 | LDEMQRQLAAAEDEKKTLSLLRMAIQQKLALTQRLELLELD              | 798 |
| Drosophila | 702 | VDDLNRQLEAAEEKKTINQLLR <del>L</del> AVQQKLALTQRLEEMEMD | 743 |
