# Supplementary material for: RNA-directed activation of cytoplasmic dynein-1 in reconstituted transport RNPs
Source: eLife journal article supplement (doi:10.7554/elife.36312), 2018-06-26
Supplement: supp [file elife-36312-supp-v1.zip › elife_poa_e36312_Figure_1_figure_supplement_2_source_data_1.xlsx]

## Sheet: Sheet1
Figure 1 - figure supplement 2C	Elution volume (ml)	A280 (mAu)	A260 (mAu)
	0.69	0.0264	2.0024
	0.7	0.11325	2.43987
	0.71	0.319571	1.602
	0.72	0.37	2.0245
	0.73	0.378	0.359857
	0.74	0.50125	0.68575
	0.75	0.729714	0.420857
	0.76	0.6985	1.10112
	0.77	0.900571	1.36886
	0.78	0.94125	1.88575
	0.79	0.870714	2.41214
	0.8	1.0025	2.47187
	0.81	1.07243	2.77943
	0.82	1.11425	5.26687
	0.83	1.38614	4.588
	0.84	1.91075	4.68112
	0.85	3.034	7.61714
	0.86	5.56538	8.38762
	0.87	10.1891	13.7523
	0.88	18.7196	28.025
	0.89	32.1496	43.241
	0.9	51.3856	63.4705
	0.91	74.4647	87.084
	0.92	96.4561	104.786
	0.93	110.479	116.867
	0.94	115.542	123.214
	0.95	115.192	121.468
	0.96	110.443	114.843
	0.97	102.923	104.998
	0.98	93.607	95.2433
	0.99	82.4888	83.6586
	0.99	82.4888
	1	73.6721	75.7405
	1.01	66.2267	68.36
	1.02	60.3105	61.6728
	1.03	55.3111	57.5166
	1.04	51.1527	52.9096
	1.05	47.5807	49.2451
	1.06	44.513	44.2755
	1.07	41.4834	42.6401
	1.08	38.533	39.1602
	1.09	36.5399	37.3994
	1.1	35.8162	38.4933
	1.11	36.2443	37.6313
	1.12	37.928	39.6097
	1.13	41.1895	40.7632
	1.14	46.3009	44.5203
	1.15	55.1321	48.4243
	1.16	70.1526	55.6634
	1.17	94.8484	70.2999
	1.18	131.736	92.768
	1.19	181.56	124.163
	1.2	241.72	159.801
	1.21	306.906	200.733
	1.22	370.699	241.566
	1.23	428.627	276.028
	1.24	476.439	305.923
	1.25	510.33	324.168
	1.26	530.753	334.307
	1.27	536.401	337.136
	1.28	529.644	331.32
	1.29	512.851	326.413
	1.3	489.203	311.001
	1.31	460.901	293.908
	1.32	430.01	277.425
	1.33	399.339	255.845
	1.34	368.84	237.51
	1.35	339.979	218.782
	1.36	313.161	204.27
	1.37	288.654	189.539
	1.38	266.254	177.072
	1.39	246.277	165.583
	1.4	228.687	154.605
	1.41	213.295	145.882
	1.42	199.687	137.736
	1.43	188.23	130.691
	1.44	178.035	123.189
	1.45	169.168	119.284
	1.46	161.439	113.186
	1.47	154.537	109.544
	1.48	148.447	107.587
	1.49	142.752	104.216
	1.5	137.441	100.023
	1.51	132.742	96.6676
	1.52	128.018	93.5956
	1.53	123.648	90.5991
	1.54	119.829	88.6727
	1.55	116.349	86.776
	1.56	113.049	84.995
	1.57	110.332	83.1859
	1.58	107.478	80.8568
	1.59	105.493	80.4869
	1.6	103.642	78.4013
	1.61	101.91	78.5314
	1.62	100.574	75.7313
	1.63	99.1997	74.3214
	1.64	97.5463	75.19
	1.65	95.874	74.2504
	1.66	93.5187	70.6873
	1.67	90.6907	68.9939
	1.68	87.663	66.5875
	1.69	84.3746	68.504
	1.7	81.3075	65.69
	1.71	78.4983	62.252
	1.72	75.9046	61.2245
	1.73	73.102	59.9339
	1.74	70.4836	57.2829
	1.75	67.8914	56.8367
	1.76	65.8595	56.3441
