# Supplementary material for: RNA-directed activation of cytoplasmic dynein-1 in reconstituted transport RNPs
Source: eLife journal article supplement (doi:10.7554/elife.36312), 2018-06-26
Supplement: supp [file elife-36312-supp-v1.zip › elife_poa_e36312_Figure_1_source_data_1.xlsx]

## Sheet: Sheet1
Figure 1D	Fraction MT-bound hairy puncta processive	Fraction MT-bound hairy puncta static	Fraction MT-bound hairy puncta diffusive		Figure 1F	ILS binding events (μm-1 min-1)	Scram binding events (μm-1 min-1)		Figure 1G	Processive ILS movements (μm-1 min-1)	Processive Scram movements (μm-1 min-1)		Figure 1H	Fraction RNA processive movements DY647-ILS	Fraction RNA processive movements DY647-ILS + DY547-Scram	Fraction processive RNA movementsDY547-Scram
	0.797101	0.115942	0.0869565			1.00712	0.153257			0.613027	0.0656814			0.896552	0.0689655	0.0344828
	0.859649	0.0350877	0.105263			1.18688	0.126754			0.795091	0.0806614			0.9	0.0857143	0.0142857
	0.857143	0.0892857	0.0535714			1.17735	0.150942			0.860371	0.135848			0.847458	0.118644	0.0338983
	0.622642	0.283019	0.0943396			1.12184	0.23908			0.91954	0.202299			0.8	0.109091	0.0909091
	0.82	0.12	0.06			0.965056	0.216057			0.720191	0.144038			0.811321	0.132075	0.0566038
	0.810345	0.172414	0.0172414			1.0158	0.1693			0.725571	0.0725571			0.904762	0.047619	0.047619
	0.657895	0.342105	0			1.34044	0.178725			0.826603	0.0893625			0.897436	0.0512821	0.0512821
	0.882353	0	0.117647			0.846836	0.2272			0.660945	0.144582			0.8	0.114286	0.0857143
	0.864865	0.135135	0			1.45168	0.433337			1.01834	0.303336			0.72549	0.196078	0.0784314
	0.875	0.111111	0.0138889			1.05204	0.156384			0.725055	0.0995173			0.862745	0.137255	0
	0.820312	0.125	0.0546875			0.781605	0.260535			0.550018	0.0578967			0.894737	0.105263	0
	0.752688	0.11828	0.129032			1.04085	0.185867			0.78064	0.0743467			0.904762	0.0952381	0
	0.944444	0.0277778	0.0277778			1.08141	0.304146			0.912437	0.253455			0.741379	0.189655	0.0689655
	0.838235	0.117647	0.0441176			0.872404	0.174481			0.484669	0.077547			0.851852	0.148148	0
	0.811321	0.0566038	0.132075			1.1016	0.1768			0.6664	0.0952			0.854167	0.145833	0
						0.913134	0.0268569			0.456567	0			1	0	0
						1.03259	0.144563			0.867378	0.0826074			0.906977	0.0697674	0.0232558
						1.02267	0.122721			0.797685	0.122721			0.85	0.125	0.025
						0.37841	0.139414			0.298745	0.0796652			0.777778	0.111111	0.111111
						0.439706	0.129325			0.336246	0.0775952			0.785714	0.142857	0.0714286
						0.58372	0.0833886			0.333554	0.0208471			0.9375	0.0625	0
						0.585527	0.146382			0.311061	0.0914886			0.6875	0.25	0.0625
						0.625414	0.109448			0.43779	0.0469061			0.892857	0.107143	0
						0.629127	0.193578			0.387155	0.145183			0.666667	0.222222	0.111111
						0.8051	0.128084			0.494039	0.0914886			0.827586	0.103448	0.0689655
						0.404546	0			0.328694	0			1	0	0
						0.358192	0			0.230266	0			1	0	0
						0.704249	0.179514			0.497117	0.124279			0.769231	0.153846	0.0769231
