# Supplementary material for: RNA-directed activation of cytoplasmic dynein-1 in reconstituted transport RNPs
Source: eLife journal article supplement (doi:10.7554/elife.36312), 2018-06-26
Supplement: supp [file elife-36312-supp-v1.zip › elife_poa_e36312_Figure_2_source_data_1.xlsx]

## Sheet: Sheet1
Figure 2C	MT binding events of RNA -TMR-dynein (μm-1 min-1)	MT binding events of RNA -dynactin (μm-1 min-1)	MT binding events of RNA -Egl/BICD2 (μm-1 min-1)	MT binding events of RNA with all complexes present (μm-1 min-1)		Figure 2D	MT binding events of dynein -dynactin (μm-1 min-1)	MT binding events of dynein -Egl/BICD2 (μm-1 min-1)	MT binding events of dynein with all complexes present (μm-1 min-1)
	-0.0094984	0.0610268	-0.00661625	0.384747			0.552771	0.532489	0.697113
	0.0702608	-0.00777231	0.0210344	0.260227			0.738875	0.403303	0.898815
	-0.0796502	-0.000845353	0.00798699	0.284239			0.490364	0.811052	0.917608
	-0.0372518	0.00643934	-0.00612057	0.45091			0.406247	0.490257	0.978587
	-0.00406445	0.00855852	0.00209873	0.45091			0.689422	0.608939	0.773833
	0.0817356	0.0291486	0.0151316	0.35654			0.763702	0.74782	0.888631
	0.0852695	0.030483	0.00177765	0.25129			0.325105	0.740819	0.799298
	0.0252238	-0.0747329	-0.0161181	0.233709			0.497066	0.422837	0.945415
	-0.0985467	0.067114	-0.0356134	0.434324			0.462903	0.383406	1.04795
	-0.0425115	-0.0348525	0.00698733	0.314784			0.406389	0.475205	1.03191
							0.417931	0.478736	0.735817
							0.543814	0.343009	0.793126
							0.434005	0.372548	0.851064
							0.564207	0.298038	0.751693
