# Supplementary material for: RNA-directed activation of cytoplasmic dynein-1 in reconstituted transport RNPs
Source: eLife journal article supplement (doi:10.7554/elife.36312), 2018-06-26
Supplement: supp [file elife-36312-supp-v1.zip › elife_poa_e36312_Figure_3_figure_supplement_1_source_data_1.xlsx]

## Sheet: Sheet1
Figure 3 - figure supplement 1A	Dynein velocity bin center (μm sec-1; frequency distribution)	Frequency of dynein velocity -RNA	Frequency of dynein velocity +hairy RNA	Dynein velocity -RNA (μm sec-1)	Dynein velocity +hairy RNA (μm sec-1)		Figure 3 - figure supplement 1B	Dynein run length bin center (μm; 1-cumulative frequency distribution)	1-cumulative frequency of dynein run length -RNA	1-cumulative frequency of dynein +hairy RNA	Dynein run length -RNA (μm; raw, unfitted values)	Dynein run length +hairy RNA (μm; raw, unfitted values)
	0	0.097561	0.0175439	0.0666057	0.44814			0	1	0.995305	3.99	1.365
	0.1	0.414634	0.0701754	0.0510919	0.0370734			1	0.430769	0.868545	1.995	2.205
	0.2	0.121951	0.0807018	0.064744	0.267254			2	0.292308	0.70892	2.73	1.785
	0.3	0.0365854	0.0526316	0.0666057	0.865725			3	0.2	0.619718	3.99	11.13
	0.4	0.0731707	0.0526316	0.0221329	0.703784			4	0.153846	0.558685	5.25	4.2
	0.5	0.0731707	0.0912281	0.20685	1.15437			5	0.123077	0.478873	1.785	1.365
	0.6	0	0.101754	0.0122042	0.479306			6	0.0923077	0.399061	1.575	3.675
	0.7	0.0487805	0.0912281	0.123076	1.32405			7	0.0461538	0.342723	0.63	6.51
	0.8	0.0121951	0.0947368	0.0146864	0.6111			8	0.0461538	0.29108	1.365	4.935
	0.9	0.0121951	0.0807018	0.122248	0.577082			9	0.0307692	0.267606	11.76	2.52
	1	0.0487805	0.0947368	0.137969	0.645118			10	0.0153846	0.220657	0.735	13.44
	1.1	0.0121951	0.0596491	0.0862564	0.0763875			11	0.0153846	0.178404	0.84	7.665
	1.2	0.0121951	0.045614	0.141072	0.8148			12	0	0.131455	2.52	1.26
	1.3	0.0243902	0.0350877	0.08274	0.85554			13	0	0.122066	1.365	11.76
	1.4	0	0.0140351	0.53781	1.06943			14	0	0.0985915	3.465	0.735
	1.5	0.0121951	0.0175439	0.393015	0.254625			15	0	0.084507	0.735	1.68
				0.04137	0.174571			16	0	0.0516432	1.05	1.785
				0.482581	0.13322			17	0	0.0375587	1.26	6.3
				0.116043	0.6111			18	0	0.00938967	1.26	7.875
				0.08274	0.116313			19	0	0.00938967	1.365	15.855
				0.361988	0.091665			20	0	0.00469484	0.63	17.43
				0.8274	0.483787			21	0	0.00469484	1.05	3.885
				0.0887387	0.782615			22	0	0	3.36	2.835
				0.672262	0.6111						1.575	2.1
				0.401496	0.423085						3.15	11.025
				0.182831	0.950668						1.26	3.78
				0.20895	0.466473						0.945	11.445
				0.0282083	0.356475						1.365	8.505
				0.12537	0.8148						0.735	21.945
				0.0927738	0.69258						0.525	9.45
				0.25074	0.8148						7.035	7.455
				0.0768936	1.0185						0.63	4.725
				0.25074	1.18309						0.63	1.26
				0.34832	0.350364						1.47	1.68
				1.33728	0.894854						1.05	2.835
				0.142504	0.327753						1.365	8.4
				1.04475	0.91665						0.63	9.87
				1.2537	0.313291						3.885	5.46
				0.170921	0.792189						0.63	15.645
				0.679087	0.8148						0.525	6.405
				0.146265	0.44977						0.63	11.55
				0.104475	0.633711						1.26	2.52
				0.86568	0.97063						1.05	5.46
				0.0896395	1.18268						7.35	5.775
				1.04475	0.148905						0.63	3.57
				0.12537	1.35807						1.575	1.365
				0.17907	0.149312						5.775	19.635
				0.153996	0.139331						8.82	13.545
				0.109908	1.18146						1.995	10.92
				0.54327	1.0185						0.84	5.25
				0.104475	0.152775						0.63	14.385
				0.702908	0.543268						1.05	1.785
				0.13937	0.500084						1.26	0.945
				0.0549538	0.356475						0.945	1.68
				0.17907	0.222237						10.395	1.365
				0.062685	0.646951						1.995	10.5
				0.004179	1.0077						6.51	1.995
				0.53721	0.0236292						2.1	9.03
				1.20731	0.170904						6.3	4.095
				0.12537	0.595211						2.73	15.33
				0.517125	0.776504						2.31	7.35
				0.369434	0.933557						0.945	9.975
				0.4137	0.6111						0.84	5.775
				1.02205	0.6111						1.155	12.495
				0.655094	0.0873873						4.725	4.83
				0.0254426	0.636563							2.415
				0.20685	0.669358							6.09
				0.121628	0.543268							2.31
				0.112733	0.577082							0.945
				0.37233	0.882632							0.63
				1.46264	0.793615							4.725
				0.0666057	0.710098							4.515
				1.06879	0.176608							8.4
				0.534294	0.722117							4.935
				1.03425	0.78343							9.87
				0.0970127	1.11628							3.15
				0.0994948	0.288643							3.675
				0.0858427	0.229162							12.915
				0.0846017	0.65184							15.54
				0.16548	1.32405							16.695
				0.0281316	0.464029							1.995
				0.166307	0.751246							3.36
					0.967575							11.97
					0.973279							7.665
					0.283754							1.785
					0.782615							1.89
					0.313291							2.94
					0.727413							2.52
					0.921539							11.34
					0.53349							5.25
					1.15437							2.31
					0.851873							15.33
					0.93702							0.42
					0.787708							10.08
					0.640229							4.41
					0.458325							1.995
					0.4074							16.065
					0.833337							17.955
					0.67384							7.35
					0.905243							9.975
					0.797893							4.095
					0.52962							9.87
					0.140146							13.86
					0.763875							2.1
					0.381937							17.955
					0.71295							7.875
					0.928057							8.925
					0.645118							7.035
					0.796263							2.625
					0.981427							11.655
					0.552842							3.045
					0.8148							17.535
					0.800745							16.17
					0.782615							1.05
					0.577082							1.89
					0.949725							1.05
					0.8442							5.67
					1.2663							3.045
					0.63315							1.89
					1.05525							16.17
					0.92862							4.515
					0.899284							1.365
					0.246295							3.36
					0.509053							7.98
					0.105525							0.945
					1.0677							6.09
					0.263813							6.72
					0.19691							17.43
					0.98497							6.405
					1.00249							4.62
					0.9225							11.55
					0.243763							14.805
					1.34312							4.935
					0.218015							2.73
					0.342956							1.155
					0.29547							8.085
					0.519605							5.775
					0.198176							18.06
					0.398673							1.47
					0.819296							18.06
					0.04221							5.985
					0.563926							5.775
					0.164197							10.815
					1.47735							3.36
					0.21105							8.505
					1.05525							11.97
					0.21105							4.62
					1.04111							1.785
					0.487526							10.29
					0.659531							10.29
					0.12663							11.025
					0.225401							7.245
					1.22409							6.09
					1.46849							2.625
					1.47735							1.785
					0.527625							18.27
					0.949725							8.4
					0.70343							1.575
					1.2663							1.26
					0.680003							11.97
					0.345278							1.995
					1.47735							2.1
					1.0084							11.55
					1.37183							3.885
					0.8442							1.68
					0.470008							9.87
					0.518128							12.075
					0.474863							1.575
					0.613944							6.51
					0.685913							6.51
					0.750494							3.78
					0.263813							2.73
					1.02971							13.965
					0.36174							4.305
					0.53459							7.98
					0.46431							2.73
					1.16077							11.13
					1.45097							5.145
					1.29374							0.525
					1.1021							6.09
					0.738675							1.68
					0.668395							2.73
					1.16077							5.145
					1.01557							7.56
					1.05525							5.67
					1.09999							10.29
					0.98497							6.825
					0.91047							15.855
					0.738675							0.945
					1.42459							1.155
					0.184669							6.51
					0.12663							1.995
					1.05525							1.26
					0.0975051							2.1
					0.21105							2.1
					0.231733							14.175
					0.96471							5.67
					0.67536							6.51
					1.31505							1.05
					1.04617							5.25
					1.32666							3.78
					1.19602							0.945
					0.232366							0.945
					0.721158							0.945
					1.00249							1.575
					1.05525							0.525
					1.21354							2.73
					0.382423							1.89
					1.05525							1.89
					1.19602							1.89
					0.992568							0.84
					0.70343							5.775
					0.224135							5.67
					0.535645
					1.05525
					0.230256
					1.00249
					0.445527
					1.40707
					0.195432
					1.2663
					0.339579
					0.307078
					1.04406
					0.245451
					0.137605
					0.8442
					0.0491747
					0.712294
					1.05525
					0.594739
					1.0065
					1.2663
					0.78384
					1.23771
					0.049959
					0.0904995
					1.0647
					0.943693
					0.0921375
					0.0931613
					0.698607
					1.09193
					0.665438
					1.02375
					0.61425
					0.580057
					0.9828
					0.850531
					0.800368
					1.12613
					1.10913
					0.9009
					0.921375
					0.672809
					0.460688
					0.563063
					0.976453
					0.555692
					0.350942
					0.563063
					0.36855
					0.584971
					1.02375
					1.16994
					0.102375
					0.505937
					0.705159
					0.682432
					1.02375
					0.307125
					0.460688
					0.36855
					0.460688
					0.61425
					0.0931613
					0.716625
					0.648443
					0.921375
					0.61425
					0.921375
					0.546068
					0.499181
					0.076167
					0.789721
