# Supplementary material for: RNA-directed activation of cytoplasmic dynein-1 in reconstituted transport RNPs
Source: eLife journal article supplement (doi:10.7554/elife.36312), 2018-06-26
Supplement: supp [file elife-36312-supp-v1.zip › elife_poa_e36312_Figure_3_source_data_1.xlsx]

## Sheet: Sheet1
Figure 3B	Processive dynein movements -Cy5-hairy RNA (μm-1 min-1)	Processive dynein movements +Cy5-hairy RNA (μm-1 min-1)		Figure 3C	MT binding events of dynein -Cy5-hairy RNA (μm-1 min-1)	MT binding events of dynein +Cy5-hairy RNA (μm-1 min-1)		Figure 3D	Fraction of MT-bound dyneins processive -Cy5-hairy RNA	Fraction of MT-bound dyneins processive +Cy5 hairy RNA		Figure 3E	Dynein velocity bin center (μm sec-1; frequency distribution)	Frequency of dynein velocity -RNA	Frequency of dynein velocity +hairy RNA	Dynein velocity -RNA (μm sec-1; raw values)	Dynein velocity +hairy RNA (μm sec-1; raw values)		Figure 3F	Dynein run length bin center (μm; 1-cumulative frequency distribution)	1-cumulative frequency of dynein run length -RNA	1-cumulative frequency of dynein run length +hairy RNA	Dynein run length -RNA (μm; raw, unfitted values)	Dynein run length +hairy RNA (μm; raw, unfitted values)		Figure 3H	Processive dynein movements -Cy5-hairy RNA (μm-1 min-1)	Processive dynein movements +Cy5-hairy RNA (μm-1 min-1)		Figure 3I	MT binding events of dynein -Cy5-hairy RNA (μm-1 min-1)	MT binding events of dynein +Cy5-hairy RNA (μm-1 min-1)		Figure 3J	Fraction of MT-bound dyneins processive -Cy5-hairy RNA	Fraction of MT-bound dyneins processive +Cy5 hairy RNA
	0.241875	1.58609			1.39078	2.79455			0.173913	0.567568			0	0.108303	0.0371991	73.8045	602.788			0	1	1	2.835	13.02			0.0817691	0.531561			1.2756	1.86047			0.0641026	0.285714
	0.261039	1.22803			1.57997	1.92076			0.165217	0.639344			0.1	0.252708	0.146608	831.6	550.927			1	0.555024	0.820988	1.05	11.445			0.130417	0.604822			1.26504	1.43965			0.103093	0.420118
	0.394361	1.28792			1.30632	1.91973			0.301887	0.670886			0.2	0.212996	0.113786	415.8	975.286			2	0.363636	0.694444	9.555	6.195			0.122418	0.435829			1.22418	1.35979			0.1	0.320513
	0.229628	1.49835			1.29166	2.1405			0.177778	0.7			0.3	0.101083	0.083151	311.85	114.425			3	0.277512	0.558642	6.93	5.04			0.0760321	0.629633			0.912386	2.23418			0.0833333	0.281818
	0.31148	1.26113			1.39543	1.94902			0.223214	0.647059			0.4	0.0288809	0.0743982	164.033	174.107			4	0.229665	0.487654	12.495	1.05			0.053734	0.71514			1.30305	1.95288			0.0412371	0.366197
	0.307468	1.24202			1.65264	1.90443			0.186047	0.652174			0.5	0.0469314	0.0568928	158.42	47.1282			5	0.157895	0.385802	12.39	4.515			0.149675	0.954838			1.41511	1.9362			0.105769	0.493151
	0.138267	0.885818			0.884907	1.89818			0.15625	0.466667			0.6	0.0433213	0.0700219	280.665	1097.53			6	0.124402	0.330247	0.63	9.87			0.148238	0.917958			1.39591	2.0909			0.106195	0.439024
	0.178253	1.18768			1.2987	1.81645			0.137255	0.653846			0.7	0.032491	0.0612691	646.777	1029			7	0.100478	0.259259	4.725	1.575			0.127696	0.62075			1.20034	1.69295			0.106383	0.366667
	0.365551	1.42417			1.12102	2.13625			0.326087	0.666667			0.8	0.0505415	0.0787746	124.74	804.472			8	0.0813397	0.222222	0.735	8.505			0.101775	0.419282			1.20434	1.6278			0.084507	0.257576
	0.139891	0.905658			1.09115	1.60722			0.128205	0.563492			0.9	0.0108303	0.0612691	443.451	1289.75			9	0.0669856	0.138889	9.765	1.26			0.0770296	0.72049			0.96287	1.89462			0.08	0.380282
	0.227204	0.783251			1.27802	1.26653			0.177778	0.618421			1	0.0180505	0.0568928	183.16	771.75			10	0.0526316	0.111111	1.575	0.735			0.174	0.436871			1.566	1.36724			0.111111	0.319527
	0.153362	1.01018			1.05437	1.69095			0.145455	0.597403			1.1	0.0216606	0.04814	120.166	208.27			11	0.0334928	0.0833333	1.155	6.195			0.0959516	0.517486			1.91903	1.66889			0.05	0.310078
	0.324005	1.1288			1.68483	1.63049			0.192308	0.692308			1.2	0.0216606	0.0415755	89.1891	823.2			12	0.00956938	0.0709877	1.05	10.29			0.166384	0.456449			1.55985	1.64036			0.106667	0.278261
	0.253438	0.440015			0.916276	0.935032			0.276596	0.470588			1.3	0.0180505	0.0284464	267.359	29.4294			13	0.00956938	0.058642	2.835	3.36			0.228425	0.368071			1.54187	1.48829			0.148148	0.247312
	0.215666	0.962509			1.36588	1.68951			0.157895	0.569697			1.4	0.00722022	0.0196937	311.85	1214.22			14	0	0.0462963	1.26	3.36			0.197363	0.590356			1.85028	1.33965			0.106667	0.440678
	0.237846	0.781643			1.21566	1.68835			0.195652	0.462963			1.5	0.0108303	0.00656455	207.9	248.606			15	0	0.0432099	1.26	8.715
	0.145949	0.792369			1.09462	1.70126			0.133333	0.465753			1.6	0	0.00437637	291.06	174.107			16	0	0.0308642	1.89	1.26
	0.201288	0.886189			1.15022	1.71867			0.175	0.515625			1.7	0.0108303	0.00437637	5.6133	628.307			17	0	0.0246914	3.36	4.515
	0.20667	1.0785			1.44669	1.96668			0.142857	0.548387			1.8	0.00361011	0.00218818	134.927	823.2			18	0	0.00617284	0.735	4.62
	0.14551	1.65518			1.19318	2.25823			0.121951	0.732955			1.9	0	0	415.8	1317.12			19	0	0.00308642	0.63	13.44
	0.147272	1.71292			0.908178	2.53131			0.162162	0.676692			2	0	0.00437637	49.896	138.092			20	0	0.00308642	1.26	8.085
	0.222732	2.69983			1.13222	3.21597			0.196721	0.839506						239.917	38.6904			21	0	0.00308642	11.97	1.68
	0.165006	1.61623			0.825028	2.44455			0.2	0.661157						75.6756	161.141			22	0	0	0.84	1.26
	0.0796705	1.17075			1.03572	2.12686			0.0769231	0.550459						183.368	205.8						1.47	4.2
	0.0501691	2.03185			0.978297	3.18574			0.0512821	0.637795						103.95	107.428						1.26	9.87
	0.269999	2.14156			1.27636	2.96524			0.211538	0.722222						181.912	227.821						4.725	3.255
	0.342583	1.59505			1.22759	2.36508			0.27907	0.674419						51.975	244.696						1.89	0.945
	0.060865	1.94634			1.18687	2.78735			0.0512821	0.698276						623.7	139.121						3.57	0.63
	0.192231				1.51382				0.126984							226.819	139.121						0.735	8.925
																92.3076	823.2						9.24	3.78
																106.861	126.567						2.835	6.195
																264.657	1029						1.785	2.31
																1247.4	195.716						1.785	0.63
																85.6548	1097.53						3.99	2.73
																415.8	1234.8						2.31	1.26
																41.58	1175.94						1.995	3.255
																504.989	133.358						3.675	5.145
																184.823	96.726						3.99	6.72
																478.17	926.1						1.89	0.735
																295.426	176.371						9.765	6.825
																161.746	833.078						5.985	2.625
																831.6	823.2						5.775	8.61
																582.12	933.92						13.755	8.61
																12.6819	905.52						1.575	1.365
																103.95	308.7						2.415	1.05
																116.84	1070.16						2.835	0.84
																1169.44	823.2						1.05	5.25
																149.688	637.98						1.785	6.3
																128.482	1120.38						1.995	5.145
																138.669	171.431						4.83	1.26
																89.1891	329.28						2.73	8.715
																564.241	180.075						11.13	7.245
																1039.5	355.417						3.15	4.725
																801.87	347.39						2.625	9.24
																17.2557	1714.93						1.155	6.615
																779.625	1234.8						5.145	3.57
																75.6756	583.031						0.63	4.725
																117.879	992.779						1.68	0.63
																207.9	68.5314						1.26	2.1
																571.725	52.6848						1.785	2.94
																346.569	102.9						4.83	0.735
																831.6	676.259						5.25	0.525
																87.7338	63.3864						7.56	6.195
																94.5945	649.916						2.835	10.5
																283.576	775.66						2.205	1.155
																51.975	274.331						5.985	3.78
																5.4054	1004.72						8.82	1.89
																987.525	747.466						1.365	9.03
																13.5135	926.1						1.05	4.935
																89.1891	24.696						1.155	4.515
																531.392	366.941						0.63	3.045
																1178.17	102.9						3.045	8.4
																207.9	1029						7.455	6.09
																762.369	164.64						5.46	2.1
																69.2307	900.375						2.31	4.725
																1039.5	1166.27						2.94	3.99
																716.008	841.928						7.455	2.1
																952.806	24.696						0.84	1.68
																170.062	160.112						0.525	10.08
																35.1351	668.85						1.05	10.185
																122.453	960.469						1.89	5.04
																195.01	110.72						1.26	8.61
																22.6611	257.25						12.18	0.945
																330.145	102.9						0.945	3.78
																32.2245	393.695						1.155	4.62
																6.0291	823.2						1.365	3.255
																10.6029	292.442						5.25	6.825
																146.362	754.669						0.525	11.97
																869.438	110.103						7.77	8.295
																284.407	352.741						2.31	3.57
																537.422	754.669						5.145	4.515
																623.7	926.1						4.41	2.31
																91.2681	411.6						11.97	3.57
																120.374	842.751						5.25	1.365
																783.575	1074.69						1.05	0.63
																65.6964	1106.17						0.63	6.405
																831.6	994.631						1.785	15.855
																73.3887	322.9						0.945	10.815
																81.2889	918.28						2.31	4.83
																10.8108	685.931						1.785	4.83
																63.4095	661.441						1.26	3.885
																611.434	977.55						1.365	12.495
																554.469	205.8						1.785	7.98
																1663.2	48.363						1.47	7.455
																801.87	940.712						1.995	5.355
																1091.47	96.9318						0.735	2.31
																166.32	137.269						5.04	3.045
																1420.58	712.48						1.47	2.415
																249.48	493.92						1.155	2.31
																349.272	823.2						2.415	17.745
																386.07	767.017						1.785	2.52
																692.931	463.05						0.84	4.095
																457.38	1260						0.525	13.86
																25.3638	1026.69						2.1	1.155
																17.2557	464.94						0.525	3.465
																15.5925	1050						0.735	2.94
																191.684	1040.97						0.945	9.24
																138.669	790.02						0.84	15.645
																124.74	187.95						1.68	17.955
																127.859	752.43						1.995	11.34
																41.58	577.5						0.735	5.04
																207.9	1019.97						1.47	9.345
																215.592	97.44						0.945	0.84
																97.2972	84						4.83	1.155
																252.391	1601.25						2.52	17.85
																87.5259	960.96						1.05	7.875
																80.0415	618.03						0.63	17.535
																692.931	483						0.84	8.82
																748.44	804.93						3.675	6.93
																831.6	215.88						0.735	14.385
																669.854	193.62						14.28	16.38
																20.9979	693.84						0.63	18.375
																44.0748	438.48						1.155	8.4
																675.675	1071						1.26	3.885
																944.905	924						1.47	1.365
																115.592	676.62						1.155	2.94
																961.538	168						0.525	0.525
																187.11	100.38						1.05	2.94
																193.139	924						0.84	2.625
																118.503	1478.82						4.095	2.73
																196.258	56.07						2.415	3.045
																144.283	1365						0.945	1.26
																1247.4	530.04						6.3	1.995
																1336.59	1106.07						3.78	2.625
																173.181	770.07						2.31	3.255
																230.977	866.25						0.63	1.05
																249.48	420						10.71	3.99
																706.86	803.04						10.605	7.35
																207.9	804.93						3.255	1.89
																249.48	1422.33						1.89	2.835
																1108.73	783.93						1.26	0.945
																392.723	1006.32						4.935	3.465
																311.85	216.09						2.31	6.3
																1351.35	672						0.63	4.515
																97.0893	1036.98						1.05	0.63
																115.592	174.93						0.84	10.71
																582.12	119.91						1.155	3.99
																173.181	50.19						1.05	6.72
																267.359	432.39						7.665	11.97
																207.9	171.78						3.36	3.045
																1793.92	796.32						0.63	4.935
																844.2	694.68						8.715	5.25
																131.906	190.89						0.525	0.735
																183.613	86.94						1.155	1.785
																211.05	202.23						4.095	9.03
																37.7779	42						1.47	11.655
																281.33	714						1.785	1.26
																211.05	119.91						3.15	4.2
																168.84	975.87						1.155	3.36
																14.1403	367.5						0.63	0.735
																67.1139	364.77						3.36	1.575
																527.625	1250.97						6.72	8.295
																164.197	336						2.52	9.03
																1477.35	56.07						1.365	7.035
																118.61	599.97						0.735	1.68
																133.595	1413.51						0.525	5.985
																44.1095	1076.25						7.665	10.92
																113.545	327.6						2.1	5.355
																41.1547	54.81						6.09	0.945
																162.297	54.6						1.155	4.725
																422.1	256.62						0.525	1.995
																70.2797	1190.07						0.945	0.945
																671.561	116.76						10.5	1.575
																86.9526	235.2						1.365	0.84
																844.2	291.69						2.31	0.84
																105.525	420						0.945	1.365
																128.952	105						6.72	3.57
																230.256	267.33						2.31	9.135
																173.905	609						1.155	5.46
																145.202	504						0.84	7.035
																131.906	1995						1.575	1.155
																49.1746	210						0.945	2.1
																241.23	1627.5						3.465	1.68
																103.837	525						0.63	5.25
																100.038	1140.09						0.63	3.255
																633.15	226.8						5.46	2.52
																211.05	903						5.67	6.72
																271.41	539.91						0.63	5.985
																30.8133	567						1.155	4.83
																844.2	630						5.145	8.82
																46.431	329.91						1.68	0.63
																253.26	900.06						1.155	2.415
																489.847	531.09						0.735	5.04
																650.667	252						5.985	6.51
																527.625	931.35						1.68	5.67
																247.773	16.59						1.47	7.56
																337.68	279.93						0.735	1.05
																337.68	1221.78						2.415	3.045
																1308.51	476.49						3.57	0.525
																1266.3	721.98							1.575
																1266.3	630							5.565
																236.165	198.24							5.985
																150.69	616.98							1.995
																211.05	308.07							2.94
																35.2454	452.34							5.25
																47.9083	245.07							6.51
																112.49	148.68							3.15
																178.548	903							5.985
																131.906	665.07							2.52
																886.41	306.18							10.815
																150.69	315							4.62
																27.4365	350.07							3.36
																126.63	95.55							1.68
																1459.83	308.07							1.26
																527.625	294							0.735
																580.388	286.44							1.68
																128.529	975.87							1.05
																123.042	189							2.1
																86.9526	210							2.625
																301.59	199.5							3.15
																487.103	720.09							6.93
																1160.78	1172.43							1.89
																180.87	840							6.09
																1125.53	268.8							2.1
																1500.78	93.66							1.155
																422.1	825.09							1.575
																457.345	111.09							1.47
																295.47	763.56							8.19
																211.05	1338.75							6.825
																192.478	315							8.715
																114.178	727.02							6.93
																1260	997.5							9.87
																210	315							14.805
																1050	1050							9.03
																288.75	840							1.785
																105	560.07							13.125
																189	151.62							8.715
																214.41	476.07							4.41
																206.01	1218							8.715
																124.11	992.67							1.26
																58.38	1176							4.41
																145.32	308.07							6.825
																194.25	1190.07							10.92
																26.88	329.91							5.88
																329.91	350.07							10.08
																200.97	672							4.2
																462	30.03							14.385
																240.03	210							2.625
																242.34	93.24							3.885
																270.06	256.62							2.415
																1732.5	288.75							0.63
																252	672							1.89
																630	84							5.145
																94.92	560.07							0.945
																116.97	640.08							1.89
																315	569.94							6.93
																1155	1379.91							17.955
																201.81	840							10.185
																1680	40.74							9.135
																770.07	599.97							6.3
																489.93	14.28							12.915
																1088.22	1439.97							3.255
																1119.93	1183.56							0.945
																210	198.87							3.15
																105	487.83							3.15
																185.85	149.94							1.155
																297.57	761.25							17.22
																	65.52							15.54
																	210							5.88
																	1076.25							1.575
																	630							2.94
																	672							8.4
																	395.22							3.255
																	210							4.725
																	399							9.24
																	77.28							2.835
																	656.25							9.24
																	500.85							7.245
																	525							19.005
																	933.24							21.945
																	297.57							17.325
																	1260							9.87
																	1544.97							13.65
																	420							3.885
																	384.93							1.785
																	55.23							10.92
																	109.62							8.505
																	353.64							1.995
																	840							7.14
																	126							4.305
																	735							3.78
																	672							2.835
																	525							1.68
																	1050							1.995
																	152.67							1.26
																	94.5							1.365
																	572.67							8.4
																	1386							5.46
																	1260							6.93
																	1353.24							1.155
																	1400.07							4.41
																	210							1.47
																	149.94							1.155
																	136.92							2.415
																	980.07							3.045
																	315							9.24
																	32.34							2.31
																	866.25							3.255
																	1950.06							0.84
																	31.5							7.665
																	212.73							8.82
																	382.41							9.24
																	630							6.51
																	1140.09							3.255
																	588
																	79.59
																	218.82
																	120.75
																	577.5
																	244.44
																	1290.03
																	714
																	337.47
																	19.11
																	322.98
																	290.85
																	489.93
																	525
																	10.08
																	354.48
																	1025.22
																	119.91
																	1329.93
																	756
																	553.56
																	93.24
																	105
																	459.48
																	470.61
																	162.96
																	376.53
																	980.07
																	81.48
																	1077.93
																	1199.94
																	1150.8
																	328.02
																	863.31
																	536.76
																	252
																	945
																	935.55
																	236.25
																	315
																	407.61
																	525
																	504
																	439.11
																	809.97
																	464.31
																	875.07
																	149.94
																	85.89
																	210
																	1155
																	1260
																	956.76
																	699.93
																	882
																	378
																	900.06
																	1050
																	577.5
																	924
																	315
																	909.93
																	245.07
																	394.38
																	1069.11
																	787.5
																	98.07
																	630
																	90.09
																	1680
																	517.02
																	1085.07
																	674.94
																	1155
																	111.09
																	1421.49
																	115.92
																	69.93
																	141.96
																	396.69
																	66.78
																	370.65
																	3.99
																	131.67
																	296.52
																	723.24
																	372.33
																	945
																	420
																	805.77
																	1295.07
																	210
																	1030.89
																	1092
																	248.22
																	219.03
																	594.93
																	687.33
																	746.76
																	586.53
																	997.5
																	892.5
																	1229.97
																	140.07
																	354.48
																	65.94
																	997.5
																	1260
																	909.93
																	1199.94
																	1820.07
																	1066.17
																	210
																	140.07
																	1260
																	1470
																	577.5
																	439.11
																	60.9
																	525
																	1086.96
																	770.07
																	19.95
																	560.07
																	170.52
																	397.95
																	105
																	202.86
																	399
																	411.6
																	599.97
																	1183.56
																	651
