# Supplementary material for: RNA-directed activation of cytoplasmic dynein-1 in reconstituted transport RNPs
Source: eLife journal article supplement (doi:10.7554/elife.36312), 2018-06-26
Supplement: supp [file elife-36312-supp-v1.zip › elife_poa_e36312_Figure_4_figure_supplement_1_source_data_1.xlsx]

## Sheet: Sheet1
Figure 4 - figure supplement 1C	Fraction MT-bound dyneins co-localised with BICD2 -hairy RNA	Fraction MT-bound dyneins co-localised with BICD2 +hairy RNA
	0.157303	0.422819
	0.0935673	0.443548
	0.153846	0.574468
	0.195402	0.460606
	0.133333	0.431373
	0.152381	0.409722
	0.192308	0.513761
	0.0909091	0.47191
	0.162963	0.37963
	0.109091	0.359155
	0.211765	0.324786
	0.153061	0.373737
	0.157143	0.329545
	0.172727	0.388889
	0.1625	0.333333
	0.0933333	0.349398
	0.109375	0.364583
	0.15625
