# Supplementary material for: RNA-directed activation of cytoplasmic dynein-1 in reconstituted transport RNPs
Source: eLife journal article supplement (doi:10.7554/elife.36312), 2018-06-26
Supplement: supp [file elife-36312-supp-v1.zip › elife_poa_e36312_Figure_4_figure_supplement_2_source_data_1.xlsx]

## Sheet: Sheet1
Figure 4 - figure supplement 2A	Fraction MT-bound dyneins co-localised with Egl -hairy RNA	Processive Egl movements -hairy RNA (μm-1 min-1)	Processive dynein movements -hairy RNA (μm-1 min-1)	Fraction MT-bound dyneins co-localised with Egl +hairy RNA	Processive Egl movements +hairy RNA (μm-1 min-1)	Processive dynein movements +hairy RNA (μm-1 min-1)		Figure 4 - figure supplement 2B	Fraction MT-bound dyneins co-localised with BICD2 -hairy RNA	Processive BICD2 movements -hairy RNA (μm-1 min-1)	Processive dynein movements -hairy RNA (μm-1 min-1)	Fraction MT-bound dyneins co-localised with BICD2 +hairy RNA	Processive BICD2 movements +hairy RNA (μm-1 min-1)	Processive dynein movements +hairy RNA (μm-1 min-1)
	0.0448276	0.0321739	0.329783	0.44	0.720652	1.22197			0.157303	0.186753	0.271641	0.422819	0.612676	1.0604
	0.0515873	0.0602326	0.378605	0.219512	0.34556	0.703461			0.0935673	0.10416	0.272418	0.443548	0.596117	1.00881
	0.0192308	0.0166917	0.275414	0.236364	0.365623	0.609372			0.153846	0.177965	0.415252	0.574468	1.21674	1.82512
	0.0307692	0.0163235	0.293824	0.272109	0.683955	1.175			0.195402	0.221021	0.47888	0.460606	0.72539	1.2801
	0.0229885	0	0.128077	0.243243	0.344134	0.851278			0.133333	0.15114	0.319072	0.431373	0.656314	1.22884
	0.0604396	0.0609502	0.348287	0.372781	0.768249	1.18955			0.152381	0.170177	0.368717	0.409722	0.657613	1.14425
	0.0212766	0.0544272	0.29935	0.309013	0.628567	1.09492			0.192308	0.15219	0.30438	0.513761	0.601959	1.12257
	0.0493827	0.0430801	0.33387	0.363636	0.658431	1.22708			0.0909091	0.228389	0.436015	0.47191	0.595014	1.09483
	0.0891089	0.0524535	0.297237	0.268966	0.652219	1.10726			0.162963	0.219529	0.365882	0.37963	0.593361	1.20526
	0.0454545	0.0909194	0.534152	0.30303	0.679575	0.993225			0.109091	0.17236	0.384495	0.359155	0.449225	0.752755
	0.0175439	0.0340798	0.374878	0.34965	0.753077	1.15176			0.211765	0.17711	0.450825	0.324786	0.530902	0.846574
	0.04	0.0453609	0.378008	0.348571	0.545736	0.937243			0.153061	0.143052	0.400545	0.373737	0.599241	1.16103
	0.0263158	0.0289042	0.337215	0.308219	0.495645	0.729699			0.157143	0.107912	0.23124	0.329545	0.673433	1.11537
	0.0277778	0.0552553	0.331532	0.385246	0.509412	0.647091			0.172727	0.155157	0.394945	0.388889	0.846331	0.9289
	0.0275862	0.0216433	0.313828	0.335878	0.464667	0.730191			0.1625	0.150455	0.338524	0.333333	0.707651	0.958278
									0.0933333	0.127745	0.212908	0.349398	0.597301	0.938617
									0.109375	0.0981229	0.245307	0.364583	0.631791	1.05298
									0.15625	0.171871	0.343742
