# Supplementary material for: RNA-directed activation of cytoplasmic dynein-1 in reconstituted transport RNPs
Source: eLife journal article supplement (doi:10.7554/elife.36312), 2018-06-26
Supplement: supp [file elife-36312-supp-v1.zip › elife_poa_e36312_Figure_4_source_data_1.xlsx]

## Sheet: Sheet1
Figure 4C	Fraction MT-bound dyneins co-localised with Egl -hairy RNA	Fraction MT-bound dyneins co-localised with Egl +hairy RNA
	0.0448276	0.44
	0.0515873	0.219512
	0.0192308	0.236364
	0.0307692	0.272109
	0.0229885	0.243243
	0.0604396	0.372781
	0.0212766	0.309013
	0.0493827	0.363636
	0.0891089	0.268966
	0.0454545	0.30303
	0.0175439	0.34965
	0.04	0.348571
	0.0263158	0.308219
	0.0277778	0.385246
	0.0275862	0.335878
