# Supplementary material for: RNA-directed activation of cytoplasmic dynein-1 in reconstituted transport RNPs
Source: eLife journal article supplement (doi:10.7554/elife.36312), 2018-06-26
Supplement: supp [file elife-36312-supp-v1.zip › elife_poa_e36312_Figure_5_figure_supplement_1_source_data_1.xlsx]

## Sheet: Sheet1
Figure 5 - figure supplement 1A	Dynein velocity bin center (μm sec-1; frequency distribution)	Frequency of dynein velocity -RNA	Frequency of dynein velocity +hairy RNA	Dynein velocity -RNA (μm sec-1; raw values)	Dynein velocity +hairy RNA (μm sec-1; raw values)		Figure 5 - figure supplement 1B	Dynein run length bin center (μm; 1-cumulative frequency distribution)	1-cumulative frequency of dynein run length -RNA	1-cumulative frequency of dynein run length +hairy RNA	Dynein run length -RNA (μm; raw, unfitted values)	Dynein run length +hairy RNA (μm; raw, unfitted values)
	0	0.16129	0.121212	1.48725	0.652969			0	0.777344	0.92674	15.855	5.25
	0.2	0.431085	0.256198	0.982537	1.04475			2	0.453125	0.6337	1.995	1.05
	0.4	0.102639	0.112948	0.14314	1.17681			4	0.273438	0.446886	0.945	11.235
	0.6	0.0879765	0.123967	0.930825	1.10451			6	0.1875	0.29304	4.725	3.885
	0.8	0.0821114	0.101928	1.55137	0.0160891			8	0.128906	0.157509	3.15	4.62
	1	0.0469208	0.118457	0.186165	0.287306			10	0.0820312	0.0879121	0.945	11.235
	1.2	0.0381232	0.0909091	0.107976	0.190562			12	0.0429688	0.021978	1.26	3.57
	1.4	0.0322581	0.046832	0.11625	1.49044			14	0.0273438	0.010989	0.945	2.415
	1.6	0.0117302	0.0192837	0.180994	0.263068			16	0.0078125	0	4.41	10.605
	1.8	0	0.00826446	0.188233	0.96117			18	0.0078125	0	8.295	16.59
	2	0.0058651	0	0.16548	0.27059			20	0.00390625	0	7.35	4.725
	2.2	0	0	1.44795	0.470137			22	0.00390625	0	15.225	2.835
				1.6548	0.0896395			24	0	0	1.995	4.62
				0.641235	1.61936						1.89	0.63
				1.39148	1.21191						1.995	7.14
				0.78603	0.0804457						16.695	1.26
				0.74466	1.41041						0.525	5.145
				0.302415	1.04475						0.63	3.675
				0.723975	0.940275						6.93	5.25
				1.34452	0.194115						8.085	5.145
				0.0397152	1.07964						1.785	1.155
				0.155138	0.4179						2.73	5.46
				0.344819	0.268083						0.945	12.495
				0.788512	0.11931						4.095	1.365
				0.530984	0.51548						2.205	6.93
				0.251116	0.123907						4.305	7.245
				0.192164	0.803622						3.78	1.575
				0.62055	0.930872						1.05	5.565
				0.806715	0.164235						6.195	8.82
				0.361988	0.90538						0.525	1.47
				0.256908	1.46265						11.97	0.735
				0.155138	0.90538						3.78	15.96
				0.0955647	0.20895						2.415	6.615
				0.118111	0.79401						1.47	1.05
				0.20685	0.144593						14.7	0.84
				0.0874975	1.18412						4.095	5.67
				0.103425	0.285008						3.15	2.205
				1.2411	1.10743						2.52	2.31
				0.147691	1.2537						4.62	5.04
				0.274283	0.108445						11.76	2.625
				0.20685	0.0812815						0.63	5.67
				0.153483	1.32328						3.36	2.31
				0.131557	1.19666						2.1	1.47
				0.269732	0.69643						0.735	4.725
				0.308	0.33432						7.14	0.84
				0.156792	1.12833						0.945	0.525
				0.26332	0.130594						2.1	0.945
				1.03425	1.11433						1.365	7.245
				1.6548	0.0956991						4.2	7.875
				0.12411	0.590075						6.615	6.615
				1.2411	0.652969						3.78	6.09
				0.85698	1.61184						1.47	1.47
				0.197542	0.15316						1.05	0.945
				0.354541	0.225039						0.945	4.83
				0.62055	1.17534						0.945	1.26
				0.66192	0.16716						0.735	3.99
				0.137969	0.174055						1.155	0.84
				0.111285	0.188055						2.94	8.82
				0.215124	1.09699						6.405	2.625
				0.137969	0.151907						3.045	4.41
				0.0380604	0.54327						2.625	3.045
				2.0685	1.12833						3.465	7.98
				1.34452	0.364409						0.945	9.45
				0.107355	1.31638						1.47	3.675
				0.465413	1.21191						0.945	2.415
				0.0974263	1.46265						8.4	7.14
				0.62055	0.470137						2.205	5.355
				0.4137	1.37301						9.345	8.295
				1.42209	0.62685						4.515	0.945
				0.112733	0.203517						3.78	4.305
				0.723975	0.00982065						6.3	2.73
				0.517125	1.09699						0.63	2.94
				0.14314	0.32638						6.195	2.415
				0.465413	1.2537						1.155	3.36
				0.0062055	1.21191						4.41	4.2
				0.758519	0.181369						1.05	2.205
				0.0891524	1.35817						0.945	0.735
				0.113767	0.273307						1.155	3.255
				0.401871	0.71649						1.26	8.505
				0.742411	1.2537						0.63	1.05
				1.37214	0.522375						0.525	1.47
				0.0359667	0.580463						1.155	8.4
				0.121206	0.058506						11.235	5.67
				0.11684	1.18412						0.735	11.34
				0.0848232	0.171966						1.89	1.89
				0.72765	0.381125						0.63	7.665
				0.168815	0.371513						0.735	4.2
				0.111434	0.940275						2.1	5.88
				0.29106	0.24468						1.05	2.415
				1.11746	0.90538						7.35	2.1
				0.213929	1.46265						4.725	2.73
				0.356341	1.39307						1.26	6.405
				0.155925	0.156713						11.13	0.63
				1.11518	0.66864						3.675	1.89
				0.485031	1.19394						5.67	2.835
				0.051975	0.87759						7.035	11.235
				1.2474	0.29253						1.995	5.145
				0.051975	0.498346						2.73	5.985
				0.0567567	1.41041						0.84	1.68
				0.485031	0.261188						4.095	1.365
				0.051975	0.48748						6.93	1.575
				0.226819	0.47766						5.775	10.29
				0.17817	0.020895						1.785	3.15
				0.0945945	0.522375						1.68	1.89
				0.0952182	0.452795						9.345	1.365
				0.146154	0.612015						9.03	0.945
				0.491476	1.61184						0.63	1.785
				0.58212	0.0616403						1.365	2.205
				0.16632	1.01696						11.865	5.67
				0.215384	0.114505						11.76	4.935
				0.0640332	0.243845						2.31	9.66
				0.14553	0.0695803						4.2	3.57
				0.18711	0.911858						9.87	2.73
				0.2079	1.20146						12.285	6.51
				0.121206	0.464287						11.445	9.975
				0.230977	0.118057						9.66	8.4
				0.346569	0.910395						3.675	1.785
				0.193139	0.0896395						1.155	9.765
				0.0975051	0.62685						1.155	11.97
				0.0819126	0.705206						0.84	1.995
				0.66528	0.617865						0.42	3.255
				0.2079	0.814905						3.36	5.04
				0.16632	0.787533						5.985	2.52
				0.15738	1.19101						10.815	11.655
				1.4553	0.8358						13.23	7.35
				0.0683991	0.90538						15.54	5.04
				0.112474	0.12537						0.42	2.1
				0.114553	0.731325						0.735	11.55
				1.31663	0.89556						1.785	3.255
				1.35135	0.37611						1.995	9.135
				0.8316	0.90538						1.365	1.575
				2.02703	0.470137						0.525	3.15
				0.0733887	0.470137						0.735	7.455
				0.0172557	0.16716						1.365	1.575
				0.118711	0.731325						3.675	12.075
				0.047817	0.854814						4.62	4.83
				1.0395	0.37611						7.035	9.975
				1.17817	0.892843						20.58	1.89
				0.195634	1.28149						0.63	2.835
				0.547193	0.591955						5.775	0.42
				0.190644	0.20895						0.84	3.15
				0.529106	0.123281						11.13	8.4
				0.0467775	1.12833						0.945	11.34
				0.218295	0.356469						14.805	1.365
				0.12474	0.90538						0.945	4.305
				0.180249	1.03075						1.26	6.09
				0.72765	0.25074						5.04	4.725
				0.267359	1.18412						1.89	3.255
				1.55239	0.26265						23.31	0.945
				0.190644	0.27853						7.77	1.26
				0.143451	0.318858						1.365	12.18
				0.61081	1.22382						1.89	9.45
				0.535758	0.198502						7.035	5.04
				0.866319	0.92544						8.715	8.505
				0.950311	0.371513						1.47	7.665
				0.13368	0.55727						2.31	2.835
				1.00977	0.20895						1.89	3.675
				0.0532224	1.6716						11.97	8.4
				0.987525	0.20895						10.29	3.045
				0.779625	0.00438795						1.995	5.145
				0.0837837	0.191189						2.31	0.63
				1.4553	0.50148						0.42	1.26
				1.14345	0.45969						8.61	0.84
				1.14345	0.522375						8.505	1.05
				0.0979209	0.8358						3.045	4.2
				0.10395	0.325126						6.3	2.52
				0.15842	0.0737594						0.84	3.465
				0.0575883	0.0491033						0.735	5.04
				0.352598	0.00940275						3.045	5.775
				0.930976	0.641685						3.255	5.46
				0.91476	0.647745						3.465	0.735
				0.0451143	0.4179						4.095	7.77
				0.941579	1.00547						1.575	8.4
				0.140748	1.04475						3.15	5.775
				0.63659	0.235069						0.735	2.52
				0.669854	0.20895						4.2	5.67
				0.08316	1.85443						1.155	4.2
				0.11185	0.44778						4.2	7.245
				0.441787	0.649417						5.985	3.78
				0.438877	0.0522375						0.735	3.78
				0.900831	0.121191						3.675	4.095
				0.51975	0.374438						1.47	7.035
				0.0970893	1.88055						15.12	10.08
				0.189237	0.940275						0.735	11.235
				0.127312	0.170921						0.63	3.675
				0.763875	0.104475						1.26	6.825
				0.160108	1.2537						1.785	2.625
				0.139331	1.11433						1.575	5.145
				1.288	0.867978						0.735	1.26
				0.24444	0.20895						9.45	2.94
				0.0904428	0.0896395						1.575	5.985
				0.0959427	1.22382						1.05	4.935
				0.514139	1.51489						1.365	2.205
				0.458325	1.34334						1.26	5.985
				0.562212	0.202473						0.945	8.505
				0.37603	0.14919						5.145	8.82
				0.10185	0.0927738						3.78	0.735
				0.30555	0.0612224						1.47	0.84
				0.150127	0.897649						5.355	7.77
				0.216329	1.70963						2.205	1.995
				0.24444	0.527808						2.52	9.765
				0.23507	1.20898						1.26	7.455
				0.0452214	1.17325						2.415	2.1
				0.380919	0.705206						9.345	2.73
				0.10185	0.562493						9.975	1.365
				0.494787	1.6716						0.84	4.41
				0.162145	1.00986						1.05	3.045
				0.220607	0.787533						0.84	7.98
				0.6111	0.17907						0.84	1.89
				0.853096	0.147519						1.995	3.57
				0.456899	0.4179						0.84	11.55
				0.10185	0.13937						2.73	13.965
				0.0784245	0.10155						3.675	2.835
				0.640229	0.155041						6.72	2.73
				0.0431844	0.132056						0.63	4.305
				1.10589	0.76622						0.63	9.87
				1.24766	0.62685						5.67	4.305
				0.168256	0.820965						1.575	13.86
				0.89628	0.194115						2.1	7.98
				0.0627396	0.182831						4.41	4.515
				0.107961	0.909559						6.93	4.83
				0.217348	1.04475						7.77	11.55
				0.0120183	0.957618						4.515	10.92
				0.145442	1.6716						1.26	14.07
				0.149923	0.867978						0.63	5.355
				0.168867	0.900577						13.44	0.945
				0.0943131	0.736025						3.045	4.095
				0.0012222	0.48636						0.84	11.13
				0.0804615	0.455962						9.345	7.245
				0.543268	0.0869368						1.47	3.465
				0.0792393	1.31723						4.935	15.12
				0.984482	0.0790335						1.68	8.82
				0.421048	1.01325						0.63	5.04
				0.145442	0.0674824						0.63	5.775
				0.187404	1.06391						3.57	4.095
				0.169071	0.64848						1.365	2.52
				0.191071	0.337818						0.84	3.99
				0.678932	0.60795						1.155	1.05
				0.129553	0.506625						5.88	2.94
				0.173349	0.88862						4.62	5.565
				0.248921	0.463258						2.625	1.47
				0.150942	0.385035						3.99	1.575
				1.16109	0.144692						1.68	9.66
				0.0839244	0.562962						5.88	5.985
				0.792189	0.82742						2.31	1.995
				0.950668	0.187046						5.145	8.4
				0.797893	0.515744						3.465	7.98
				0.637377	0.506625						2.625	1.47
				0.118757	0.132533						8.085	6.405
				0.24444	0.759938						10.29	9.66
				0.0499065	1.36059						2.415	11.865
				0.0370734	0.0674824						4.305	12.285
				0.160108	0.88862						0.84	2.1
				0.116313	0.965627						1.26	4.83
				0.320013	0.222915						0.945	7.77
				0.28518	0.0429618						0.735	1.155
				0.116313	0.177319							8.19
				0.163775	0.32424							10.29
				0.179663	0.270132							4.095
				0.156645	0.93219							1.68
				0.882632	0.128277							1.68
				0.24444	0.554248							9.555
				0.02037	0.0674824							11.34
				0.831707	0.24014							9.03
				0.150942	0.945768							9.45
				0.271532	0.36477							8.19
				0.167849	0.675432							5.46
				1.29859	0.878082							2.625
				0.6111	0.0549181							2.835
				0.6111	1.06391							2.625
				0.111017	1.17537							8.61
				0.780782	0.37774							1.995
				0.725172	0.244599							1.785
				0.105109	0.4053
				0.181089	1.14842
				0.156645	0.696711
				0.181089	0.898347
				0.543268	0.195355
				0.241996	0.214606
				0.271532	0.0522837
				0.151349	1.03858
				0.155016	0.634902
				0.869188	0.692455
				0.04074	0.119158
				0.111017	0.0751832
				0.8148	0.112876
				0.331012	0.0982853
				0.50925	0.348558
				0.0904428	0.93219
				1.06943	1.04223
				0.129757	0.0674824
				0.232829	1.49961
				0.0391104	0.0271551
				0.230181	0.245814
				0.15746	0.222915
				0.0533694	0.798644
				0.188015	0.543913
				0.2037	0.130304
				0.746968	0.790335
				0.130979	0.60795
				0.397215	0.115713
				0.0452214	0.436508
				0.0941094	0.101325
				0.215107	0.619906
				0.130979	1.07567
				0.581971	0.835931
				0.232829	0.584037
				0.15359	0.802089
				0.129553	0.105378
				0.315735	0.464068
				1.08633	0.17509
				0.8148	0.839579
				0.135868	1.11458
				0.4074	0.395168
				0.112646	0.60795
				0.08148	0.072346
				0.26481	0.313094
				0.14809	0.129696
				0.0560175	0.106594
				0.18333	0.0915978
				0.354642	0.14915
				0.995889	0.56742
				0.44814	0.0869368
				0.475232	0.0553235
				0.483787	0.8106
				0.232829	1.44388
				0.113257	0.0954481
				0.164997	0.0190491
				0.44814	0.118753
				0.232218	0.0691037
				0.840263	0.962588
				0.50925	0.0591738
				0.560175	0.0877475
				0.0749616	0.149556
				0.185367	0.104973
				0.167238	0.64848
				0.379697	0.240748
				0.2037	0.739065
				0.188015	0.131115
				0.0833133	0.0772097
				0.158479	0.469337
					1.01325
					0.847482
					0.0960561
					0.557288
					0.987919
					0.53682
					0.08106
					0.179345
					0.120171
					0.0484334
					0.922057
					1.28744
					0.285737
					0.759938
					1.43699
					1.05378
					1.26656
					0.109431
					0.123617
					0.103149
					0.274996
					0.574107
