# Supplementary material for: RNA-directed activation of cytoplasmic dynein-1 in reconstituted transport RNPs
Source: eLife journal article supplement (doi:10.7554/elife.36312), 2018-06-26
Supplement: supp [file elife-36312-supp-v1.zip › elife_poa_e36312_Figure_5_source_data_1.xlsx]

## Sheet: Sheet1
Figure 5B	Fraction MT-bound hairy puncta processive	Fraction MT-bound hairy puncta static	Fraction MT-bound hairy puncta diffusive		Figure 5C	Processive dynein movements -Cy5-hairy RNA (μm-1 min-1)	Processive dynein movements +Cy5-hairy RNA (μm-1 min-1)		Figure 5D	MT binding events of dynein -Cy5-hairy RNA (μm-1 min-1)	MT binding events of dynein +Cy5-hairy RNA (μm-1 min-1)		Figure 5E	Fraction of MT-bound dyneins processive -Cy5-hairy RNA	Fraction of MT-bound dyneins processive +Cy5-hairy RNA
	0.739726	0.205479	0.0547945			0.324749	1.04555			1.16368	1.57529			0.27907	0.663717
	0.803571	0.160714	0.0357143			0.20798	1.29817			0.790323	2.04711			0.263158	0.634146
	0.741379	0.224138	0.0344828			0.192867	1.17859			1.04699	1.74683			0.184211	0.674699
	0.694915	0.288136	0.0169492			0.423963	1.23523			1.47602	1.63226			0.287234	0.756757
	0.736842	0.210526	0.0526316			0.208306	1.38222			0.972096	2.18084			0.214286	0.633803
	0.704918	0.245902	0.0491803			0.224121	1.33364			0.896483	1.9902			0.25	0.670103
	0.831579	0.147368	0.0210526			0.160634	1.2824			1.08874	1.90149			0.147541	0.674419
	0.842105	0.149123	0.00877193			0.288283	1.72271			1.10072	2.52849			0.261905	0.681319
	0.753846	0.230769	0.0153846			0.415722	1.39713			1.0771	1.97129			0.385965	0.708738
	0.770833	0.1875	0.0416667			0.326272	0.973289			1.17123	1.59619			0.278571	0.609756
	0.68	0.293333	0.0266667			0.522766	1.04347			1.64816	1.48848			0.317181	0.701031
	0.821918	0.164384	0.0136986			0.562787	0.994365			1.57943	1.43631			0.356322	0.692308
	0.6625	0.325	0.0125			0.325148	1.53451			1.08383	2.06648			0.3	0.742574
	0.725806	0.225806	0.0483871			0.509765	1.17939			1.58203	1.84414			0.322222	0.639535
	0.720588	0.25	0.0294118			0.243181	1.03311			1.51028	1.39182			0.161017	0.742268
