# Supplementary material for: RNA-directed activation of cytoplasmic dynein-1 in reconstituted transport RNPs
Source: eLife journal article supplement (doi:10.7554/elife.36312), 2018-06-26
Supplement: supp [file elife-36312-supp-v1.zip › elife_poa_e36312_Figure_6_figure_supplement_1_source_data_1.xlsx]

## Sheet: Sheet1
Elution volume (ml)	Normalised absorbance at 280 nm -RNA (mAu)	Normalised absorbance at 280 nm +ILS (mAu)
5.64	3.67914	-0.00219158
5.65	3.66622	0.0053181
5.66	3.64853	0.0118278
5.66	3.62269	0.0161687
5.67	3.59689	0.0184236
5.68	3.61031	0.0317136
5.68	3.62897	0.0485995
5.69	3.65192	0.0761285
5.7	3.6428	0.0771142
5.7	3.65914	0.075791
5.71	3.72226	0.0948104
5.72	3.71212	0.129867
5.72	3.68726	0.16916
5.73	3.66239	0.206454
5.73	3.67441	0.242776
5.74	3.68531	0.276041
5.75	3.62457	0.315335
5.75	3.58108	0.349155
5.76	3.54857	0.375948
5.77	3.50504	0.4292
5.77	3.45769	0.49302
5.78	3.40558	0.576116
5.79	3.38458	0.669256
5.79	3.35729	0.762045
5.8	3.32095	0.840886
5.81	3.32723	0.925279
5.81	3.33246	1.01154
5.82	3.32099	1.09113
5.82	3.3435	1.16971
5.83	3.36833	1.25048
5.84	3.36833	1.34509
5.84	3.38605	1.45252
5.85	3.41669	1.57065
5.86	3.47216	1.70604
5.86	3.48404	1.85461
5.87	3.46635	2.0153
5.88	3.45679	2.19229
5.88	3.44051	2.35916
5.89	3.41756	2.50908
5.9	3.38216	2.68709
5.9	3.35733	2.87928
5.91	3.34968	3.10719
5.92	3.34776	3.31805
5.92	3.34729	3.52863
5.93	3.34729	3.81796
5.93	3.33293	4.0968
5.94	3.30612	4.37126
5.95	3.25494	4.68086
5.95	3.26461	4.99573
5.96	3.29854	5.31285
5.97	3.30666	5.65369
5.97	3.31431	6.00208
5.98	3.32005	6.36374
5.99	3.30951	6.71467
5.99	3.29803	7.07639
6	3.28703	7.46967
6.01	3.26599	7.75354
6.01	3.25021	8.02431
6.02	3.24448	8.3082
6.03	3.24736	8.58714
6.03	3.2435	8.84856
6.04	3.22246	9.03377
6.04	3.18706	9.21578
6.05	3.14833	9.38472
6.06	3.11437	9.46356
6.06	3.09193	9.52078
6.07	3.07327	9.55379
6.08	3.05032	9.53665
6.08	3.04797	9.47494
6.09	3.06374	9.36731
6.1	3.01394	9.26517
6.1	2.99059	9.14508
6.11	3.00206	8.99091
6.12	2.93165	8.77458
6.12	2.84652	8.55677
6.13	2.75088	8.39383
6.13	2.70122	8.1984
6.14	2.6769	7.98421
6.15	2.69555	7.69813
6.15	2.70079	7.46479
6.16	2.69888	7.26681
6.17	2.70223	6.993
6.17	2.69935	6.71283
6.18	2.69169	6.42976
6.19	2.66777	6.23695
6.19	2.63955	6.03387
6.2	2.60559	5.76814
6.21	2.55105	5.57069
6.21	2.51717	5.39046
6.22	2.51908	5.23086
6.23	2.49945	5.06475
6.23	2.47505	4.8986
6.24	2.44589	4.74642
6.24	2.46556	4.59114
6.25	2.49519	4.43543
6.26	2.50522	4.28751
6.26	2.49706	4.12838
6.27	2.48129	3.95741
6.28	2.48609	3.86905
6.28	2.50764	3.77354
6.29	2.53391	3.6658
6.3	2.4932	3.53871
6.3	2.45928	3.42964
6.31	2.43441	3.35956
6.32	2.40428	3.25178
6.32	2.36025	3.13511
6.33	2.29377	3.03599
6.34	2.27663	2.95725
6.34	2.27522	2.88746
6.35	2.28908	2.80337
6.35	2.29193	2.72902
6.36	2.28858	2.66194
6.37	2.27327	2.60275
6.37	2.25797	2.55179
6.38	2.24076	2.50699
6.39	2.22928	2.44063
6.39	2.21062	2.38435
6.4	2.18576	2.34402
6.41	2.14317	2.2824
6.41	2.1126	2.21978
6.42	2.09539	2.16321
6.43	2.06572	2.1156
6.43	2.0169	2.07105
6.44	1.9423	2.03051
6.45	1.95821	2.013
6.45	1.98398	2.00419
6.46	1.98015	1.97289
6.46	1.94807	1.96023
6.47	1.91227	1.95672
6.48	1.91801	1.90666
6.48	1.90314	1.8602
6.49	1.87012	1.82291
6.5	1.80029	1.77049
6.5	1.76402	1.71583
6.51	1.75828	1.65626
6.52	1.73626	1.65581
6.52	1.72818	1.65994
6.53	1.73965	1.65468
6.54	1.7066	1.66786
6.54	1.68563	1.69296
6.55	1.70523	1.71749
6.55	1.71861	1.73334
6.56	1.72576	1.74059
6.57	1.72002	1.74485
6.57	1.7368	1.76491
6.58	1.76261	1.79864
6.59	1.77073	1.79239
6.59	1.75395	1.79273
6.6	1.71999	1.80024
6.61	1.67791	1.80913
6.61	1.63583	1.80785
6.62	1.59375	1.78858
6.63	1.5914	1.80712
6.63	1.59955	1.83318
6.64	1.61915	1.84695
6.65	1.63445	1.85
6.65	1.66415	1.84959
6.66	1.72872	1.89355
6.66	1.74298	1.91434
6.67	1.73385	1.92185
6.68	1.69321	1.94289
6.68	1.69184	1.95687
6.69	1.70616	1.96438
6.7	1.69563	1.97777
6.7	1.69422	1.99719
6.71	1.70331	2.02172
6.72	1.72388	2.02329
6.72	1.71952	2.02489
6.73	1.68891	2.03565
6.74	1.67794	2.03847
6.74	1.6372	2.04263
6.75	1.54539	2.06391
6.76	1.51247	2.10336
6.76	1.50536	2.14791
6.77	1.53405	2.19146
6.77	1.51197	2.24001
6.78	1.49009	2.29407
6.79	1.55322	2.34613
6.79	1.56029	2.39795
6.8	1.53398	2.4502
6.81	1.49237	2.49175
6.81	1.45747	2.52971
6.82	1.42831	2.56149
6.83	1.42163	2.61663
6.83	1.40727	2.67624
6.84	1.37858	2.72204
6.85	1.36999	2.77645
6.85	1.35418	2.83689
6.86	1.32358	2.90071
6.86	1.32506	2.97224
6.87	1.32838	3.04306
6.88	1.31452	3.08778
6.88	1.30305	3.15833
6.89	1.29301	3.25094
6.9	1.29301	3.33002
6.9	1.29301	3.39208
6.91	1.29399	3.43988
6.92	1.32174	3.54601
6.92	1.33509	3.64466
6.93	1.33701	3.71911
6.94	1.3461	3.76835
6.94	1.34415	3.82092
6.95	1.32647	3.9378
6.96	1.27717	4.03587
6.96	1.24472	4.127
6.97	1.25764	4.22686
6.97	1.27821	4.36924
6.98	1.29106	4.53099
6.99	1.26382	4.66814
6.99	1.27248	4.77498
7	1.29446	4.86333
7.01	1.2911	4.9829
7.01	1.28583	5.11591
7.02	1.28298	5.27602
7.03	1.30691	5.40719
7.03	1.32506	5.54798
7.04	1.33654	5.72042
7.05	1.33892	5.88546
7.05	1.32116	6.0331
7.06	1.26952	6.12892
7.07	1.23177	6.25787
7.07	1.21029	6.40988
7.08	1.21986	6.54829
7.08	1.22368	6.67976
7.09	1.21982	6.81147
7.1	1.19687	6.99769
7.1	1.17583	7.15993
7.11	1.15432	7.29383
7.12	1.14811	7.45279
7.12	1.09734	7.61344
7.13	1.01368	7.76863
7.14	1.02765	7.93715
7.14	1.0506	8.09586
7.15	1.07882	8.23001
7.16	1.04479	8.39349
7.16	1.02909	8.56149
7.17	1.05442	8.71266
7.18	1.08073	8.86023
7.18	1.08734	9.00623
7.19	1.04143	9.17443
7.19	1.01996	9.32566
7.2	1.00029	9.46707
7.21	0.931903	9.59633
7.21	0.889389	9.71891
7.22	0.863584	9.83479
7.23	0.867914	9.96219
7.23	0.849691	10.0952
7.24	0.814323	10.2389
7.25	0.841641	10.398
7.25	0.855464	10.5622
7.26	0.849726	10.7367
7.27	0.831068	10.8818
7.27	0.821539	11.0202
7.28	0.833016	11.1649
7.28	0.830598	11.3034
7.29	0.816705	11.4373
7.3	0.782275	11.5404
7.3	0.770834	11.6635
7.31	0.778051	11.8094
7.32	0.823487	11.9338
7.32	0.85023	12.0532
7.33	0.865063	12.1628
7.34	0.898553	12.288
7.34	0.897509	12.4052
7.35	0.861167	12.5074
7.36	0.883721	12.6252
7.36	0.878851	12.7519
7.37	0.825764	12.8828
7.38	0.779389	13.0127
7.38	0.741638	13.1378
7.39	0.720598	13.2527
7.39	0.679926	13.3567
7.4	0.641237	13.4526
7.41	0.633586	13.5703
7.41	0.639829	13.6639
7.42	0.648888	13.7342
7.43	0.63023	13.845
7.43	0.62164	13.9628
7.44	0.618284	14.083
7.45	0.592914	14.1626
7.45	0.581003	14.2568
7.46	0.583386	14.3834
7.47	0.565197	14.4927
7.47	0.551338	14.5955
7.48	0.547513	14.6873
7.49	0.534593	14.7999
7.49	0.504893	14.9195
7.5	0.445598	15.0286
7.5	0.449529	15.1202
7.51	0.468117	15.2033
7.52	0.445164	15.3064
7.52	0.420298	15.4314
7.53	0.392076	15.5959
7.54	0.357647	15.7119
7.54	0.321774	15.8407
7.55	0.285432	16.0041
7.56	0.241439	16.1399
7.56	0.206071	16.2608
7.57	0.184562	16.3469
7.58	0.188892	16.484
7.58	0.198456	16.6542
7.59	0.208019	16.8254
7.59	0.212314	17.0098
7.6	0.221913	17.2052
7.61	0.255873	17.4061
7.61	0.28359	17.6094
7.62	0.30943	17.8132
7.63	0.346241	17.9929
7.63	0.366777	18.1877
7.64	0.372515	18.4036
7.65	0.378253	18.6635
7.65	0.380635	18.9176
7.66	0.378722	19.1483
7.67	0.361003	19.4383
7.67	0.348588	19.7422
7.68	0.346206	20.0328
7.69	0.333755	20.2892
7.69	0.331409	20.5352
7.7	0.354361	20.8991
7.7	0.385939	21.2505
7.71	0.413152	21.5942
7.72	0.415065	21.9757
7.72	0.415065	22.3842
7.73	0.407378	22.8107
7.74	0.366237	23.3275
7.74	0.320331	23.8041
7.75	0.272043	24.2371
7.76	0.237145	24.7486
7.76	0.218052	25.3007
7.77	0.212783	25.9517
7.78	0.208958	26.4696
7.78	0.196508	27.002
7.79	0.169729	27.7318
7.8	0.180772	28.4101
7.8	0.1903	29.0685
7.81	0.171173	29.6939
7.81	0.176946	30.4564
7.82	0.198021	31.3623
7.83	0.242014	32.1877
7.83	0.274026	33.048
7.84	0.294562	33.956
7.85	0.283555	34.9038
7.85	0.284059	35.8854
7.86	0.294093	36.9246
7.87	0.303656	38.0067
7.87	0.29164	39.1224
7.88	0.252916	40.2732
7.89	0.276913	41.6185
7.89	0.291675	42.9804
7.9	0.278286	44.1132
7.9	0.245265	45.5567
7.91	0.21134	47.1648
7.92	0.194125	48.6413
7.92	0.154392	50.0313
7.93	0.108991	51.3513
7.94	0.0802999	53.1891
7.94	0.0602337	54.9932
7.95	0.0478185	56.7112
7.96	0.0569128	58.4437
7.96	0.0664765	60.2429
7.97	0.0779529	62.1246
7.98	0.0726841	63.9878
7.98	0.057347	65.8689
7.99	0.0300992	67.8748
8	0.00858972	69.8758
8	-0.000938765	71.9226
8.01	0.0162759	74.3989
8.01	0.0138586	76.427
8.02	0.0158065	78.2832
8.03	0.045941	80.8205
8.03	0.0818136	83.1117
8.04	0.111878	85.2594
8.05	0.0788565	87.1485
8.05	0.0755708	89.2434
8.06	0.0932549	91.7383
8.07	0.095637	93.9082
8.07	0.0769438	96.0316
8.08	0.0367762	98.0995
8.09	0.0325166	100.145
8.09	0.0325166	102.173
8.1	0.0396982	104.155
8.11	0.0401675	106.077
8.11	0.0512098	107.949
8.12	0.0913773	109.792
8.12	0.0999318	111.737
8.13	0.0980191	113.695
8.14	0.0884554	115.091
8.14	0.103793	116.544
8.15	0.129128	118.056
8.16	0.142986	119.661
8.16	0.166444	121.039
8.17	0.195135	122.079
8.18	0.222382	123.287
8.18	0.239092	124.436
8.19	0.244361	125.402
8.2	0.273557	126.247
8.2	0.296005	127.002
8.21	0.303656	127.664
8.22	0.323758	128.215
8.22	0.346241	128.707
8.23	0.373019	129.003
8.23	0.375366	129.208
8.24	0.369159	129.356
8.25	0.372515	129.373
8.25	0.404128	129.307
8.26	0.450972	129.178
8.27	0.472951	128.889
8.27	0.525135	128.521
8.28	0.605001	127.971
8.29	0.692517	127.459
8.29	0.814064	126.885
8.3	0.979029	126.053
8.31	1.15215	125.218
8.31	1.33963	124.374
8.32	1.55339	123.481
8.32	1.81359	122.465
8.33	2.08856	121.397
8.34	2.37547	120.242
8.34	2.73088	119.061
8.35	3.12688	117.841
8.36	3.58118	116.494
8.36	4.14565	115.058
8.37	4.79316	113.489
8.38	5.53011	112.281
8.38	6.3825	110.988
8.39	7.34987	109.52
8.4	8.52119	107.836
8.4	9.77374	106.182
8.41	11.1256	104.833
8.42	12.7154	103.154
8.42	14.4214	101.34
8.43	16.3016	99.69
8.43	18.4193	98.1988
8.44	20.6541	96.8212
8.45	23.0508	94.9551
8.45	25.687	93.1737
8.46	28.4682	91.493
8.47	31.3957	89.8624
8.47	34.5158	88.2168
8.48	37.7977	86.5489
8.49	41.3561	84.7285
8.49	44.9612	83.0874
8.5	48.6012	81.7364
8.51	52.4278	80.227
8.51	56.3228	78.6398
8.52	60.3037	76.8423
8.53	64.2324	75.3765
8.53	68.1857	74.011
8.54	72.2259	72.2772
8.54	76.1985	70.7159
8.55	80.1349	69.2471
8.56	84.0216	68.0525
8.56	87.7861	66.6977
8.57	91.4618	65.0756
8.58	94.9778	63.7262
8.58	98.3726	62.391
8.59	101.661	61.0645
8.6	104.696	59.7795
8.6	107.603	58.4562
8.61	110.368	57.0148
8.62	112.89	55.9308
8.62	115.272	54.8821
8.63	117.447	53.7323
8.63	119.378	52.4628
8.64	121.179	51.1687
8.65	122.776	50.2614
8.65	124.171	49.1847
8.66	125.437	47.9692
8.67	126.497	46.9745
8.67	127.376	46.0501
8.68	128.115	45.2109
8.69	128.624	44.1917
8.69	128.995	43.1871
8.7	129.237	42.2733
8.71	129.349	41.3925
8.71	129.373	40.5488
8.72	129.289	39.7564
8.73	129.119	38.965
8.73	128.902	38.175
8.74	128.609	37.4289
8.74	128.118	36.6848
8.75	127.54	35.9412
8.76	126.871	35.1099
8.76	126.133	34.4172
8.77	125.343	33.8235
8.78	124.423	33.0888
8.78	123.473	32.4232
8.79	122.493	31.8265
8.8	121.427	31.3154
8.8	120.347	30.7789
8.81	119.259	30.1289
8.82	118.077	29.5677
8.82	116.881	29.0261
8.83	115.676	28.491
8.84	114.441	27.9924
8.84	113.176	27.5087
8.85	111.854	27.0481
8.85	110.518	26.6051
8.86	109.189	26.1809
8.87	107.897	25.7617
8.87	106.558	25.306
8.88	105.197	24.805
8.89	103.87	24.4793
8.89	102.583	24.1327
8.9	101.328	23.751
8.91	100.044	23.3413
8.91	98.7676	22.9684
8.92	97.5028	22.6961
8.93	96.2333	22.3494
8.93	94.9522	21.9812
8.94	93.6472	21.6591
8.95	92.3786	21.3636
8.95	91.1148	21.0794
8.96	89.8394	20.7795
8.96	88.59	20.4792
8.97	87.3592	20.1791
8.98	86.169	19.8858
8.98	84.9917	19.603
8.99	83.8274	19.3287
9	82.7032	19.0411
9	81.6125	18.8033
9.01	80.5495	18.6278
9.02	79.4396	18.4489
9.02	78.3595	18.2597
9.03	77.3194	18.0233
9.04	76.288	17.8556
9.04	75.2455	17.7045
9.05	74.1839	17.4898
9.05	73.1827	17.2898
9.06	72.1885	17.0972
9.07	71.1599	16.9228
9.07	70.1711	16.7384
9.08	69.2062	16.548
9.09	68.2876	16.3829
9.09	67.3781	16.218
9.1	66.4791	16.052
9.11	65.6553	15.9031
9.11	64.8414	15.7502
9.12	64.0362	15.5842
9.13	63.2165	15.4381
9.13	62.3964	15.2954
9.14	61.5721	15.156
9.15	60.8008	15.0141
9.15	60.041	14.8751
9.16	59.2898	14.7549
9.16	58.5342	14.643
9.17	57.7946	14.5388
9.18	57.1194	14.4292
9.18	56.4039	14.3216
9.19	55.6675	14.2142
9.2	54.933	14.0875
9.2	54.2072	13.9548
9.21	53.4909	13.8186
9.22	52.7994	13.6911
9.22	52.1243	13.566
9.23	51.4682	13.4417
9.24	50.8495	13.2894
9.24	50.2355	13.1547
9.25	49.622	13.0801
9.26	49.0343	12.9674
9.26	48.4466	12.835
9.27	47.8441	12.7224
9.27	47.2521	12.6328
9.28	46.6793	12.5572
9.29	46.1648	12.3989
9.29	45.633	12.2826
9.3	45.097	12.2018
9.31	44.6117	12.1355
9.31	44.157	12.0673
9.32	43.7271	11.9907
9.33	43.2589	11.9314
9.33	42.7683	11.8696
9.34	42.2499	11.7867
9.35	41.7584	11.7147
9.35	41.2706	11.6458
9.36	40.779	11.58
9.36	40.2808	11.4938
9.37	39.7998	11.4029
9.38	39.3771	11.3338
9.38	38.9893	11.251
9.39	38.6101	11.1518
9.4	38.2103	11.089
9.4	37.8178	11.0203
9.41	37.4285	10.9424
9.42	37.0144	10.8753
9.42	36.5955	10.8092
9.43	36.1709	10.7476
9.44	35.7606	10.6741
9.44	35.358	10.6105
9.45	34.9697	10.586
9.46	34.6369	10.5356
9.46	34.318	10.4789
9.47	34.012	10.4461
9.47	33.715	10.4042
9.48	33.4263	10.3564
9.49	33.1532	10.2985
9.49	32.8811	10.2435
9.5	32.5984	10.1935
9.51	32.2422	10.1272
9.51	31.9171	10.0592
9.52	31.6086	9.99008
9.53	31.2585	9.90063
9.53	30.9253	9.83428
9.54	30.6135	9.8055
9.55	30.3515	9.76806
9.55	30.0871	9.73167
9.56	29.8131	9.71365
9.57	29.5558	9.67809
9.57	29.2904	9.63173
9.58	28.9944	9.54338
9.58	28.7564	9.47116
9.59	28.5364	9.409
9.6	28.3131	9.37171
9.6	28.1046	9.34028
9.61	27.9014	9.31675
9.62	27.6666	9.29322
9.62	27.4524	9.26077
9.63	27.252	9.21132
9.64	27.0076	9.15737
9.64	26.7556	9.10866
9.65	26.4978	9.07236
9.66	26.2808	9.00214
9.66	26.0666	8.93386
9.67	25.8543	8.89348
9.68	25.6736	8.84692
9.68	25.5043	8.79654
9.69	25.3479	8.75073
9.69	25.1997	8.72125
9.7	25.0514	8.70301
9.71	24.8869	8.66372
9.71	24.7244	8.62147
9.72	24.5579	8.57672
9.73	24.3432	8.54723
9.73	24.1683	8.51068
9.74	24.0305	8.45737
9.75	23.8751	8.42987
9.75	23.7096	8.41552
9.76	23.5318	8.41126
9.77	23.3898	8.38408
9.77	23.2473	8.349
9.78	23.089	8.348
9.78	22.9072	8.33322
9.79	22.7212	8.31095
9.8	22.5376	8.28841
9.8	22.398	8.28504
9.81	22.2761	8.29455
9.82	22.146	8.27888
9.82	22.0265	8.27328
9.83	21.9141	8.27654
9.84	21.7917	8.27021
9.84	21.6813	8.2577
9.85	21.5823	8.23218
9.86	21.4412	8.23612
9.86	21.3073	8.2383
9.87	21.1911	8.20652
9.88	21.0883	8.19103
9.88	20.973	8.17926
9.89	20.8234	8.1685
9.89	20.7077	8.163
9.9	20.5943	8.16471
9.91	20.4465	8.18599
9.91	20.3395	8.20171
9.92	20.2568	8.20957
9.93	20.1875	8.19155
9.93	20.1152	8.17677
9.94	20.0383	8.16538
9.95	19.9838	8.15987
9.95	19.9216	8.15086
9.96	19.8489	8.13609
9.97	19.7427	8.14646
9.97	19.6385	8.16285
9.98	19.5409	8.1606
9.99	19.4558	8.161
9.99	19.3548	8.16573
10	19.1985	8.1795
10	19.1135	8.19126
10.01	19.0498	8.20303
10.02	18.9714	8.22758
10.02	18.8844	8.24318
10.03	18.7954	8.24944
10.04	18.7314	8.26178
10.04	18.6596	8.2612
10.05	18.5827	8.24418
10.06	18.5263	8.23408
10.06	18.4708	8.22914
10.07	18.4158	8.24391
10.08	18.346	8.25
10.08	18.2862	8.25726
10.09	18.248	8.30507
10.09	18.2222	8.34888
10.1	18.1781	8.38921
10.11	18.0686	8.41049
10.11	18.0261	8.43176
10.12	17.9954	8.45199
10.13	17.8835	8.44874
10.13	17.774	8.45359
10.14	17.6741	8.47586
10.15	17.6464	8.48605
10.15	17.5775	8.50325
10.16	17.4675	8.53983
10.17	17.4561	8.56854
10.17	17.46	8.59105
10.18	17.481	8.5973
10.19	17.436	8.623
10.19	17.392	8.65643
10.2	17.3724	8.6702
10.2	17.3231	8.69656
10.21	17.2614	8.73015
10.22	17.1868	8.73666
10.22	17.1333	8.75251
10.23	17.0898	8.77804
10.24	17.0343	8.80616
10.24	17.0272	8.84064
10.25	17.0468	8.88204
10.26	16.9855	8.9471
10.26	16.9526	9.00652
10.27	16.9526	9.04782
10.28	16.9636	9.09324
10.28	16.9521	9.12024
10.29	16.8985	9.10873
10.3	16.8521	9.12333
10.3	16.7937	9.15143
10.31	16.7019	9.19298
10.31	16.6259	9.23287
10.32	16.5609	9.27217
10.33	16.5227	9.33343
10.33	16.5108	9.38275
10.34	16.5189	9.42305
10.35	16.551	9.44171
10.35	16.5921	9.46918
10.36	16.6366	9.52267
10.37	16.648	9.57129
10.37	16.649	9.62881
10.38	16.6394	9.72022
10.39	16.6375	9.79329
10.39	16.6404	9.85811
10.4	16.648	9.89965
10.4	16.7146	9.9583
10.41	16.7935	10.0188
10.42	16.8638	10.0548
10.42	16.9082	10.1038
10.43	16.9431	10.1691
10.44	16.9809	10.2414
10.44	16.9899	10.299
10.45	16.9813	10.336
10.46	16.9923	10.3851
10.46	17.0244	10.4306
10.47	17.0741	10.4689
10.48	17.0822	10.5203
10.48	17.1062	10.583
10.49	17.1578	10.6606
10.5	17.2367	10.7344
