# Supplementary material for: RNA-directed activation of cytoplasmic dynein-1 in reconstituted transport RNPs
Source: eLife journal article supplement (doi:10.7554/elife.36312), 2018-06-26
Supplement: supp [file elife-36312-supp-v1.zip › elife_poa_e36312_Figure_6_figure_supplement_2_source_data_1.xlsx]

## Sheet: Sheet1
1 mg ml-1 Egl/BICD2 -ILS r (cm)	1 mg ml-1 Egl/BICD2 -ILS Speed 1 fringes	1 mg ml-1 Egl/BICD2 -ILS Speed 2 fringes	1 mg ml-1 Egl/BICD2 -ILS Speed 3 fringes	1 mg ml-1 Egl/BICD2 -ILS Speed 1 fit	1 mg ml-1 Egl/BICD2 -ILS Speed 2 fit	1 mg ml-1 Egl/BICD2 -ILS Speed 3 fit	1 mg ml-1 Egl/BICD2 -ILS Speed 1 residuals	1 mg ml-1 Egl/BICD2 -ILS Speed 2 residuals	1 mg ml-1 Egl/BICD2 -ILS Speed 3 residuals	0.33 mg ml-1 Egl/BICD2 -ILS r (cm)	0.33 mg ml-1 Egl/BICD2 -ILS Speed 1 fringes	0.33 mg ml-1 Egl/BICD2 -ILS Speed 2 fringes	0.33 mg ml-1 Egl/BICD2 -ILS Speed 3 fringes	0.33 mg ml-1 Egl/BICD2 -ILS Speed 1 fit	0.33 mg ml-1 Egl/BICD2 -ILS Speed 2 fit	0.33 mg ml-1 Egl/BICD2 -ILS Speed 3 fit	0.33 mg ml-1 Egl/BICD2 -ILS Speed 1 residuals	0.33 mg ml-1 Egl/BICD2 -ILS Speed 2 residuals	0.33 mg ml-1 Egl/BICD2 -ILS Speed 3 residuals	0.11 mg ml-1 Egl/BICD2 -ILS r (cm)	0.11 mg ml-1 Egl/BICD2 -ILS Speed 1 fringes	0.11 mg ml-1 Egl/BICD2 -ILS Speed 2 fringes	0.11 mg ml-1 Egl/BICD2 -ILS Speed 3 fringes	0.11 mg ml-1 Egl/BICD2 -ILS Speed 1 fit	0.11 mg ml-1 Egl/BICD2 -ILS Speed 2 fit	0.11 mg ml-1 Egl/BICD2 -ILS Speed 3 fit	0.11 mg ml-1 Egl/BICD2 -ILS Speed 1 residuals	0.11 mg ml-1 Egl/BICD2 -ILS Speed 2 residuals	0.11 mg ml-1 Egl/BICD2 -ILS Speed 3 residuals	1 mg ml-1 Egl/BICD2 +ILS r (cm)	1 mg ml-1 Egl/BICD2 +ILS Speed 1 fringes	1 mg ml-1 Egl/BICD2 +ILS Speed 2 fringes	1 mg ml-1 Egl/BICD2 +ILS Speed 3 fringes	1 mg ml-1 Egl/BICD2 +ILS Speed 1 fit	1 mg ml-1 Egl/BICD2 +ILS Speed 2 fit	1 mg ml-1 Egl/BICD2 +ILS Speed 3 fit	1 mg ml-1 Egl/BICD2 +ILS Speed 1 residuals	1 mg ml-1 Egl/BICD2 +ILS Speed 2 residuals	1 mg ml-1 Egl/BICD2 +ILS Speed 3 residuals	0.33 mg ml-1 Egl/BICD2 +ILS r (cm)	0.33 mg ml-1 Egl/BICD2 +ILS Speed 1 fringes	0.33 mg ml-1 Egl/BICD2 +ILS Speed 2 fringes	0.33 mg ml-1 Egl/BICD2 +ILS Speed 3 fringes	0.33 mg ml-1 Egl/BICD2 +ILS Speed 1 fit	0.33 mg ml-1 Egl/BICD2 +ILS Speed 2 fit	0.33 mg ml-1 Egl/BICD2 +ILS Speed 3 fit	0.33 mg ml-1 Egl/BICD2 +ILS Speed 1 residuals	0.33 mg ml-1 Egl/BICD2 +ILS Speed 2 residuals	0.33 mg ml-1 Egl/BICD2 +ILS Speed 3 residuals
5.8545	0.0462493	3.37596	1.10581	0.111937	2.95961	1.33178	-0.0656874	-4.46473	0.914323	6.3761	-0.0421232	1.04035	0.494691	0.0381611	1.02397	0.507892	-0.0802843	0.0163811	-0.0132011	6.8945	0.00103796	0.480198	0.213316	0.0274993	0.496144	0.232844	-0.0264614	-0.0159454	-0.0195282	5.8659	5.75645	2.27403	0.399054	5.61698	2.27814	0.556027	0.139464	-1.9498	2.57206	6.3647	1.69927	0.812798	0.266592	1.61419	0.812046	0.321145	0.0850778	0.000752091	-0.054553
5.8553	0.00580931	3.26615	1.50398	0.113775	2.96391	1.33772	-0.107966	-4.57454	1.31249	6.3768	-0.0319422	1.04572	0.505892	0.0387505	1.02557	0.510331	-0.0706927	0.0201495	-0.00443888	6.8953	-0.000302076	0.479208	0.212836	0.027927	0.496831	0.233833	-0.0282291	-0.0176225	-0.0209966	5.8667	5.75388	2.23096	0.345264	5.62321	2.28378	0.560253	0.130672	-1.99287	2.51827	6.3655	1.69731	0.81419	0.271209	1.61611	0.814078	0.32246	0.0811924	0.000112176	-0.0512505
5.8561	-0.00680065	3.2185	1.52409	0.115643	2.96883	1.34453	-0.122444	-4.62219	1.3326	6.3776	-0.0221592	1.03937	0.510344	0.0394337	1.02741	0.513133	-0.0615929	0.0119584	-0.0027895	6.8961	-0.00363207	0.473428	0.212346	0.0283611	0.497617	0.234967	-0.0319932	-0.0241885	-0.0226214	5.8674	5.75153	2.22524	0.312874	5.62866	2.28873	0.56398	0.122865	-1.99859	2.48588	6.3662	1.72169	0.834712	0.278879	1.6178	0.815859	0.323617	0.103885	0.0188523	-0.044738
5.8568	0.0166594	3.1756	1.44152	0.117299	2.97376	1.35138	-0.10064	-4.66509	1.25003	6.3783	-0.0104322	1.03259	0.500193	0.0400401	1.02902	0.515602	-0.0504723	0.00356829	-0.0154088	6.8968	-0.00770211	0.479138	0.213176	0.0287479	0.498405	0.236109	-0.03645	-0.0192668	-0.0229334	5.8682	5.78383	2.22001	0.291474	5.6349	2.29441	0.568275	0.148928	-2.00382	2.46448	6.367	1.71821	0.84197	0.286989	1.61973	0.8179	0.324949	0.0984741	0.0240694	-0.0379597
5.8576	0.00739932	3.14092	1.43583	0.11922	2.97808	1.35739	-0.111821	-4.69977	1.24434	6.3791	-0.0421772	1.04784	0.500635	0.0407444	1.03086	0.518436	-0.0829216	0.0169771	-0.0178006	6.8976	0.0049479	0.487528	0.226506	0.0291959	0.499095	0.237113	-0.024248	-0.0115671	-0.0106068	5.869	5.78819	2.19734	0.286064	5.64116	2.3001	0.572601	0.14703	-2.02649	2.45907	6.3677	1.66602	0.826665	0.302207	1.62142	0.819945	0.326289	0.0445921	0.00671935	-0.0240816
5.8583	-0.0312207	3.10612	1.39607	0.120931	2.98303	1.36431	-0.152152	-4.73457	1.20458	6.3799	-0.0676072	1.03998	0.507668	0.0414642	1.03271	0.521284	-0.109071	0.0072695	-0.0136164	6.8983	0.0061779	0.489518	0.228556	0.0295929	0.499886	0.238265	-0.023415	-0.0103679	-0.00970864	5.8697	5.76289	2.17846	0.269144	5.64664	2.30508	0.57641	0.116251	-2.04537	2.44215	6.3685	1.66938	0.818131	0.293092	1.62336	0.821741	0.327472	0.0460151	-0.00361007	-0.0343797
5.8591	-0.00826073	3.05922	1.35649	0.122916	2.98736	1.3704	-0.131176	-4.78147	1.165	6.3806	-0.0646542	1.02449	0.497758	0.0421039	1.03433	0.523788	-0.106758	-0.0098325	-0.0260303	6.8991	-0.000162005	0.497318	0.234206	0.0300527	0.500678	0.239422	-0.0302147	-0.00335932	-0.00521576	5.8705	5.77986	2.18742	0.255234	5.65291	2.31079	0.580792	0.12695	-2.03641	2.42824	6.3692	1.70709	0.807708	0.280877	1.62506	0.823798	0.328833	0.082029	-0.0160904	-0.0479558
5.8599	0.0138294	3.01212	1.29988	0.124932	2.99233	1.37738	-0.111103	-4.82857	1.10839	6.3814	-0.0612792	1.02523	0.49347	0.0428458	1.03618	0.526668	-0.104125	-0.0109471	-0.033198	6.8999	-0.00794208	0.501828	0.239486	0.0305214	0.501372	0.24044	-0.0384635	0.000456572	-0.000954151	5.8712	5.76663	2.19569	0.269494	5.65841	2.31581	0.584665	0.108215	-2.02814	2.4425	6.37	1.71041	0.817633	0.277682	1.627	0.82586	0.330204	0.0834074	-0.00822747	-0.0525217
5.8606	-0.00746071	2.96627	1.25063	0.12672	2.9973	1.3844	-0.13418	-4.87442	1.05914	6.3821	-0.0343382	1.03208	0.502031	0.0435045	1.0378	0.529201	-0.0778427	-0.0057236	-0.0271704	6.9006	-0.00245202	0.504598	0.236966	0.0309377	0.502166	0.241608	-0.0333897	0.00243235	-0.00464225	5.872	5.76065	2.19302	0.286324	5.66471	2.32155	0.589118	0.0959387	-2.03081	2.45933	6.3708	1.69959	0.834691	0.280763	1.62894	0.827668	0.33141	0.0706418	0.00702256	-0.050647
5.8614	0.0201093	2.92735	1.21828	0.128799	3.00166	1.39057	-0.10869	-4.91334	1.02679	6.3829	-0.00635222	1.03166	0.518405	0.0442734	1.03966	0.532111	-0.0506257	-0.00799847	-0.0137057	6.9014	0.0044179	0.498288	0.239256	0.0314195	0.502862	0.242635	-0.0270016	-0.00457358	-0.00337899	5.8727	5.78666	2.20933	0.291414	5.67022	2.32731	0.593604	0.11644	-2.0145	2.46442	6.3715	1.71589	0.832588	0.298618	1.63065	0.829741	0.332801	0.0852375	0.00284684	-0.0341828
5.8621	0.0444694	2.9167	1.20699	0.130651	3.00664	1.39766	-0.0861815	-4.92399	1.0155	6.3836	-0.0104312	1.03797	0.518157	0.0449567	1.04153	0.535035	-0.0553879	-0.00355065	-0.0168784	6.9021	0.0153379	0.494368	0.234516	0.0318463	0.503659	0.243814	-0.0165083	-0.00929022	-0.00929785	5.8735	5.76968	2.23174	0.301914	5.67653	2.33236	0.597552	0.0931458	-1.99209	2.47492	6.3723	1.72217	0.828172	0.30364	1.6326	0.831559	0.334027	0.0895666	-0.00338721	-0.0303867
5.8629	0.0170894	2.91867	1.21139	0.132794	3.01164	1.40479	-0.115705	-4.92202	1.0199	6.3844	0.000246793	1.05664	0.52811	0.0457488	1.04316	0.53761	-0.045502	0.0134778	-0.0095005	6.9029	0.041798	0.493308	0.237336	0.0323433	0.504457	0.245	0.00945473	-0.0111487	-0.00766397	5.8743	5.77976	2.23743	0.326764	5.68286	2.33815	0.602109	0.0968971	-1.9864	2.49977	6.373	1.68183	0.825879	0.299617	1.63431	0.83364	0.335436	0.0475172	-0.00776142	-0.0358188
5.8636	0.0438093	2.91138	1.20777	0.134695	3.01602	1.41105	-0.0908859	-4.92931	1.01628	6.3852	0.000803798	1.05273	0.540986	0.0465546	1.04503	0.540569	-0.0457508	0.00769734	0.000417352	6.9036	0.0653379	0.493368	0.237546	0.0327845	0.505157	0.246042	0.0325534	-0.0117884	-0.00849628	5.875	5.78363	2.25539	0.339904	5.6884	2.34322	0.606123	0.0952268	-1.96844	2.51291	6.3738	1.66929	0.84404	0.302162	1.63627	0.835728	0.336856	0.0330213	0.00831187	-0.0346934
5.8644	0.0502393	2.89736	1.1968	0.136907	3.02103	1.41825	-0.0866675	-4.94333	1.00531	6.3859	0.0225958	1.0509	0.538213	0.0472739	1.0469	0.543541	-0.0246781	0.00399351	-0.00532776	6.9044	0.0688579	0.497668	0.239906	0.033295	0.505957	0.247238	0.0355629	-0.00828862	-0.00733197	5.8758	5.76735	2.28171	0.350134	5.69475	2.34904	0.610738	0.072597	-1.94212	2.52314	6.3745	1.67397	0.85669	0.314696	1.63798	0.837559	0.338107	0.0359863	0.0191306	-0.0234107
5.8652	0.0214794	2.88781	1.19347	0.139159	3.02543	1.42458	-0.117679	-4.95288	1.00198	6.3867	0.0341378	1.06355	0.542642	0.0481091	1.04854	0.546154	-0.0139713	0.0150088	-0.00351202	6.9052	0.056788	0.499238	0.245836	0.0338135	0.506759	0.24844	0.0229745	-0.00752068	-0.00260389	5.8765	5.777	2.29311	0.380204	5.70031	2.35487	0.61539	0.0766964	-1.93072	2.55321	6.3753	1.60722	0.853327	0.334466	1.63994	0.839658	0.339548	-0.0327264	0.0136686	-0.00508231
5.8659	0.0534294	2.8982	1.20536	0.141157	3.03046	1.43185	-0.0877274	-4.94249	1.01387	6.3874	-0.00459421	1.05679	0.546191	0.0488506	1.05042	0.54916	-0.0534448	0.00636911	-0.00296915	6.9059	0.0374279	0.506578	0.247686	0.0342743	0.507462	0.249497	0.00315356	-0.000883579	-0.00181091	5.8773	5.77157	2.31387	0.398304	5.70667	2.35998	0.619493	0.064899	-1.90996	2.57131	6.3761	1.61774	0.851543	0.33021	1.64191	0.841761	0.340999	-0.0241716	0.00978196	-0.0107889
5.8667	0.0585093	2.92018	1.23	0.143473	3.0355	1.43915	-0.0849636	-4.92051	1.03851	6.3882	-0.0143972	1.04968	0.541096	0.0497108	1.05207	0.551805	-0.064108	-0.00239444	-0.0107089	6.9067	0.0312979	0.512628	0.254696	0.0348094	0.508267	0.250711	-0.00351143	0.00436163	0.00398505	5.878	5.78486	2.3354	0.410274	5.71225	2.36584	0.624218	0.0726066	-1.88843	2.58328	6.3768	1.64942	0.860402	0.326898	1.64363	0.843606	0.342277	0.00578511	0.0167962	-0.0153787
5.8674	0.0714394	2.93257	1.24771	0.145531	3.03992	1.44557	-0.0740913	-4.90812	1.05622	6.389	-0.0128552	1.05795	0.540079	0.0505891	1.05396	0.554842	-0.0634443	0.00398529	-0.014763	6.9074	0.0439579	0.521398	0.259636	0.0352838	0.508972	0.251778	0.00867414	0.0124264	0.00785816	5.8788	5.8	2.33615	0.434184	5.71864	2.37172	0.628977	0.0813565	-1.88768	2.60719	6.3776	1.64853	0.873813	0.336057	1.6456	0.84572	0.343748	0.00292313	0.0280933	-0.00769067
5.8682	0.0942793	2.93652	1.2557	0.147924	3.04498	1.45295	-0.0536448	-4.90417	1.06421	6.3897	-0.0075562	1.05292	0.549362	0.0513715	1.05585	0.557893	-0.0589277	-0.00292826	-0.00853121	6.9082	0.052398	0.528438	0.267496	0.035833	0.509779	0.253002	0.016565	0.0186591	0.0144936	5.8796	5.81217	2.33679	0.440304	5.72504	2.37687	0.633167	0.0871239	-1.88704	2.61331	6.3783	1.6647	0.86474	0.345212	1.64733	0.847575	0.345046	0.0173656	0.0171651	0.000165641
5.869	0.0913993	2.95435	1.26866	0.150356	3.05004	1.46037	-0.0589567	-4.88634	1.07717	6.3905	-0.0104112	1.05081	0.547856	0.0522785	1.05751	0.560579	-0.0626898	-0.00669754	-0.012723	6.909	0.0494479	0.530468	0.267826	0.0363915	0.510587	0.254233	0.0130564	0.019881	0.0135934	5.8803	5.82813	2.32795	0.435644	5.73065	2.38277	0.637993	0.0974765	-1.89588	2.60865	6.3791	1.66672	0.858383	0.337039	1.64931	0.849699	0.34654	0.0174091	0.00868332	-0.00950041
5.8697	0.103259	2.9895	1.30035	0.152513	3.05448	1.46689	-0.0492533	-4.85119	1.10886	6.3912	-0.0198812	1.06291	0.553262	0.0530833	1.05941	0.563667	-0.0729645	0.00350344	-0.0104051	6.9097	0.0375479	0.526108	0.263156	0.036889	0.511296	0.255316	0.000658989	0.014812	0.00784039	5.8811	5.83208	2.32218	0.433244	5.73708	2.38795	0.642252	0.0950031	-1.90165	2.60625	6.3799	1.62802	0.862747	0.321584	1.65129	0.85183	0.348043	-0.0232726	0.0109169	-0.026459
5.8705	0.0958493	3.01007	1.32922	0.155014	3.05956	1.47437	-0.059165	-4.83062	1.13773	6.392	-0.0154712	1.06242	0.567186	0.0540216	1.06131	0.566771	-0.0694928	0.00110877	0.00041455	6.9105	0.0171679	0.517438	0.256126	0.0374645	0.512107	0.256558	-0.0202966	0.0053308	-0.000432253	5.8818	5.83624	2.33756	0.428854	5.74271	2.39388	0.647152	0.0935378	-1.88627	2.60186	6.3806	1.62955	0.85989	0.325763	1.65303	0.853697	0.349367	-0.0234785	0.00619256	-0.0236036
5.8712	0.0869193	3.02144	1.35015	0.157248	3.06402	1.48096	-0.0703288	-4.81925	1.15866	6.3927	-0.0175572	1.07532	0.566191	0.0548573	1.06297	0.5695	-0.0724145	0.0123496	-0.00330877	6.9112	0.00299799	0.514698	0.252256	0.0379745	0.51292	0.257807	-0.0349765	0.00177836	-0.00555086	5.8826	5.83372	2.35603	0.443904	5.74915	2.39983	0.652087	0.084578	-1.8678	2.61691	6.3814	1.64401	0.846279	0.325983	1.65501	0.855838	0.350893	-0.0110056	-0.0095588	-0.0249093
5.872	0.0938493	3.04017	1.37783	0.159835	3.06912	1.48853	-0.0659854	-4.80052	1.18634	6.3935	-0.0128772	1.07163	0.573519	0.0558259	1.06488	0.572635	-0.0687031	0.00674558	0.000883698	6.912	0.00448799	0.511418	0.255876	0.0385667	0.513632	0.258904	-0.0340787	-0.00221372	-0.00302804	5.8834	5.83407	2.376	0.464804	5.7556	2.40504	0.656435	0.0784674	-1.84783	2.63781	6.3821	1.66204	0.851959	0.319425	1.65675	0.857716	0.352237	0.00528312	-0.00575691	-0.0328119
5.8727	0.100429	3.0563	1.40436	0.162129	3.07423	1.49613	-0.0616993	-4.78439	1.21287	6.3943	0.0120578	1.06433	0.566644	0.056811	1.06655	0.575397	-0.0447533	-0.0022254	-0.00875264	6.9127	0.0045079	0.511648	0.253136	0.039094	0.514447	0.260164	-0.0345861	-0.0027988	-0.00702846	5.8841	5.83315	2.3948	0.482694	5.76126	2.41102	0.661445	0.0718894	-1.82903	2.6557	6.3829	1.70637	0.868131	0.325851	1.65875	0.859867	0.353784	0.0476191	0.00826401	-0.0279326
5.8735	0.112249	3.04537	1.40512	0.164788	3.07871	1.50281	-0.0525382	-4.79532	1.21363	6.395	0.0395658	1.07087	0.563867	0.0576881	1.06847	0.578565	-0.0181223	0.00239754	-0.0146981	6.9135	0.00571799	0.513098	0.254596	0.039704	0.515162	0.261273	-0.033986	-0.00206375	-0.00667739	5.8849	5.84069	2.38987	0.500324	5.76774	2.41701	0.666495	0.0729485	-1.83396	2.67333	6.3836	1.69975	0.871172	0.347527	1.66049	0.862023	0.355341	0.0392523	0.00914848	-0.00781396
5.8743	0.107409	3.0282	1.38904	0.167503	3.08384	1.51049	-0.0600941	-4.81249	1.19755	6.3958	0.0519748	1.06734	0.574626	0.0587093	1.07039	0.581752	-0.00673449	-0.00304914	-0.00712633	6.9143	0.017648	0.513568	0.252276	0.0403231	0.515979	0.262545	-0.0226752	-0.00241113	-0.0102688	5.8856	5.84909	2.37788	0.496394	5.77342	2.42227	0.670941	0.0756683	-1.84595	2.6694	6.3844	1.71986	0.878554	0.351872	1.66249	0.863916	0.356715	0.0573635	0.014638	-0.00484335
5.875	0.109589	3.03367	1.3902	0.169915	3.08833	1.51725	-0.0603254	-4.80702	1.19871	6.3965	0.0487138	1.07919	0.577877	0.0596164	1.07207	0.584554	-0.0109026	0.00712049	-0.00667685	6.915	0.021518	0.513098	0.251946	0.0408725	0.516798	0.263823	-0.0193545	-0.00370002	-0.0118768	5.8864	5.8525	2.37801	0.484384	5.77993	2.42829	0.676058	0.0725722	-1.84582	2.65739	6.3852	1.71412	0.886837	0.349858	1.6645	0.866084	0.358297	0.0496207	0.0207528	-0.00843877
5.8758	0.103659	3.03675	1.39793	0.172709	3.09347	1.525	-0.0690492	-4.80394	1.20644	6.3973	0.0385468	1.08689	0.589462	0.0606683	1.07399	0.587778	-0.0221215	0.0128963	0.00168437	6.9158	0.0107679	0.507178	0.251436	0.0415117	0.517516	0.264948	-0.0307437	-0.0103381	-0.0135115	5.8871	5.86174	2.39545	0.489854	5.78563	2.43357	0.680579	0.0761089	-1.82838	2.66286	6.3859	1.72066	0.882077	0.359074	1.66625	0.868256	0.359889	0.054405	0.0138206	-0.000814408
5.8765	0.0943593	3.05	1.40827	0.175184	3.09863	1.53279	-0.0808251	-0.0486245	-0.124517	6.398	0.0114008	1.09259	0.595789	0.0616054	1.07592	0.591018	-0.0502046	0.0166646	0.00477058	6.9165	-0.00954211	0.504288	0.251886	0.0420786	0.518338	0.266238	-0.0516207	-0.01405	-0.0143524	5.8879	5.8603	2.4154	0.505024	5.79215	2.43963	0.685777	0.0681467	-0.0242229	-0.180753	6.3867	1.72422	0.888197	0.358534	1.66826	0.870161	0.36129	0.0559552	0.0180354	-0.00275615
5.8773	0.103519	3.07981	1.4394	0.178071	3.10315	1.53964	-0.0745521	-0.0233321	-0.100243	6.3988	-0.0117952	1.0926	0.597501	0.0626963	1.07762	0.593867	-0.0744916	0.0149848	0.00363392	6.9173	-0.0330421	0.504068	0.250926	0.0427352	0.519058	0.267373	-0.0757773	-0.0149901	-0.0164466	5.8887	5.851	2.41657	0.525034	5.79869	2.44569	0.69101	0.0523067	-0.0291169	-0.165976	6.3874	1.69365	0.89253	0.356911	1.67002	0.872346	0.362906	0.0236242	0.0201838	-0.00599498
5.878	0.113359	3.08522	1.46349	0.180636	3.10832	1.54752	-0.0672767	-0.0230947	-0.0840275	6.3996	-0.0086402	1.08443	0.593993	0.0638056	1.07955	0.597137	-0.0724458	0.00488496	-0.00314438	6.918	-0.063202	0.505708	0.252596	0.0433177	0.519882	0.268674	-0.10652	-0.014174	-0.0160779	5.8894	5.8384	2.40818	0.531594	5.80443	2.45101	0.695619	0.033978	-0.0428267	-0.164025	6.3882	1.67514	0.879786	0.357938	1.67204	0.874262	0.364331	0.00309968	0.00552338	-0.00639266
5.8788	0.138969	3.07594	1.46367	0.183608	3.1135	1.55543	-0.0446383	-0.0375562	-0.0917611	6.4003	0.0063628	1.08457	0.587661	0.0647901	1.08125	0.600019	-0.0584273	0.00332153	-0.0123577	6.9188	-0.085052	0.507428	0.255766	0.0439949	0.520708	0.269984	-0.129047	-0.0132802	-0.0142179	5.8902	5.83799	2.41586	0.524344	5.81099	2.45711	0.700938	0.0269928	-0.0412469	-0.176594	6.389	1.64481	0.882554	0.355145	1.67406	0.876457	0.365969	-0.0292505	0.00609636	-0.010824
5.8796	0.160469	3.07533	1.46724	0.186625	3.11804	1.56239	-0.0261561	-0.0427055	-0.0951434	6.4011	0.0225498	1.08453	0.598021	0.0659345	1.08319	0.603328	-0.0433848	0.00134289	-0.00530756	6.9196	-0.0814921	0.511028	0.256246	0.0446827	0.521432	0.271135	-0.126175	-0.0104036	-0.0148892	5.8909	5.843	2.43889	0.534474	5.81675	2.46322	0.706296	0.0262456	-0.024332	-0.171822	6.3897	1.63737	0.886773	0.354633	1.67583	0.878657	0.367618	-0.0384609	0.00811625	-0.0129849
5.8803	0.166919	3.07812	1.46813	0.189314	3.12323	1.57037	-0.0223942	-0.0451112	-0.10224	6.4018	0.0330408	1.09291	0.604672	0.066957	1.08514	0.606656	-0.0339162	0.00776875	-0.00198394	6.9203	-0.0533921	0.511628	0.261156	0.0452923	0.522261	0.272457	-0.0986843	-0.0106325	-0.0113007	5.8917	5.84528	2.45652	0.559674	5.82334	2.46859	0.711014	0.021944	-0.0120645	-0.15134	6.3905	1.62416	0.881442	0.362083	1.67785	0.880587	0.369072	-0.0536969	0.000855088	-0.00698924
5.8811	0.181839	3.09901	1.48539	0.192434	3.12779	1.5774	-0.0105946	-0.0287786	-0.0920111	6.4026	0.0380718	1.10043	0.616339	0.0681415	1.08684	0.60958	-0.0300697	0.0135888	0.00675905	6.9211	0.00372791	0.513038	0.266706	0.0459987	0.52309	0.273784	-0.0422708	-0.0100522	-0.00707829	5.8924	5.85931	2.45136	0.580354	5.82911	2.47473	0.716444	0.0301976	-0.0233667	-0.13609	6.3912	1.61667	0.891487	0.357069	1.67963	0.882799	0.370748	-0.0629617	0.00868785	-0.0136786
5.8818	0.190299	3.11912	1.51984	0.195202	3.13301	1.58547	-0.0049032	-0.0138845	-0.0656316	6.4034	0.0323748	1.10183	0.621622	0.0693464	1.0888	0.612942	-0.0369716	0.0130286	0.00868046	6.9218	0.013088	0.525818	0.272446	0.0466284	0.523818	0.274952	-0.0335404	0.00200057	-0.0025059	5.8932	5.87079	2.45308	0.575034	5.83573	2.48012	0.721235	0.0350595	-0.0270369	-0.146201	6.392	1.62648	0.892874	0.366186	1.68166	0.885017	0.372435	-0.0551856	0.00785702	-0.00624877
5.8826	0.189319	3.11141	1.52871	0.198411	3.13823	1.59358	-0.00909114	-0.0268202	-0.0648719	6.4041	0.0116668	1.09939	0.620161	0.0704162	1.09051	0.615901	-0.0587494	0.00888443	0.00425994	6.9226	0.017828	0.532488	0.277866	0.0473572	0.52465	0.276292	-0.0295292	0.00783825	0.00157392	5.894	5.8845	2.4682	0.574104	5.84236	2.48629	0.726748	0.0421324	-0.0180883	-0.152644	6.3927	1.63884	0.899294	0.374578	1.68344	0.886961	0.37392	-0.0446075	0.0123328	0.000657797
5.8834	0.188919	3.10704	1.52224	0.201679	3.14281	1.60071	-0.0127597	-0.0357695	-0.0784721	6.4049	-0.0138172	1.09606	0.619798	0.0716651	1.09247	0.619299	-0.0854824	0.00359333	0.000498712	6.9234	0.0270679	0.527238	0.278756	0.0480971	0.52538	0.27747	-0.0210292	0.00185847	0.00128555	5.8947	5.90002	2.47602	0.592084	5.84817	2.49248	0.732304	0.0518408	-0.016459	-0.14022	6.3935	1.65149	0.901583	0.368388	1.68548	0.889189	0.37563	-0.0339962	0.0123935	-0.00724202
5.8841	0.191479	3.11708	1.52597	0.204589	3.14805	1.60891	-0.0131099	-0.0309706	-0.0829341	6.4056	-0.0159362	1.09805	0.621812	0.072775	1.09444	0.622716	-0.0887112	0.00361168	-0.000903666	6.9241	0.036168	0.523418	0.277926	0.0487525	0.526215	0.278823	-0.0125846	-0.00279665	-0.000897169	5.8955	5.90747	2.46981	0.604824	5.85483	2.49791	0.737195	0.0526342	-0.0280969	-0.132371	6.3943	1.67754	0.894687	0.371883	1.68753	0.891145	0.37714	-0.0099895	0.0035423	-0.00525659
5.8849	0.200229	3.13336	1.54192	0.20796	3.15331	1.61714	-0.00773096	-0.0199437	-0.0752217	6.4064	0.00631478	1.10213	0.627593	0.0740625	1.09616	0.625721	-0.0677477	0.00596845	0.00187188	6.9249	0.0326879	0.529408	0.281786	0.0495158	0.527051	0.280183	-0.0168279	0.00235677	0.00160313	5.8962	5.9077	2.47673	0.603654	5.86067	2.50413	0.742832	0.0470343	-0.0273986	-0.139179	6.395	1.7062	0.900555	0.364595	1.68932	0.893383	0.378875	0.0168798	0.00717181	-0.0142795
5.8856	0.215379	3.13716	1.56212	0.210949	3.15791	1.62438	0.00443077	-0.0207467	-0.0622594	6.4071	0.0303858	1.1089	0.632226	0.0752055	1.09813	0.629177	-0.0448197	0.0107651	0.00304931	6.9256	0.0114579	0.532798	0.291756	0.0501935	0.527785	0.281379	-0.0387356	0.00501347	0.0103768	5.897	5.90284	2.49854	0.612364	5.86735	2.50959	0.747806	0.0354905	-0.0110462	-0.135442	6.3958	1.71735	0.897607	0.367726	1.69137	0.895628	0.380623	0.0259786	0.00197846	-0.0128965
5.8864	0.223809	3.12609	1.55614	0.214425	3.16318	1.63269	0.00938392	-0.037086	-0.0765513	6.4079	0.0368188	1.10863	0.634163	0.0765392	1.10011	0.632648	-0.0397204	0.00852835	0.00151449	6.9264	-0.00939202	0.532298	0.293976	0.0509782	0.528624	0.282751	-0.0603702	0.00367475	0.0112249	5.8978	5.89257	2.50472	0.635594	5.87405	2.51584	0.753522	0.0185161	-0.0111148	-0.117929	6.3965	1.71657	0.904453	0.375275	1.69317	0.897597	0.382162	0.0234014	0.00685585	-0.00688651
5.8871	0.229939	3.133	1.55405	0.217521	3.1678	1.64001	0.0124183	-0.0347962	-0.0859609	6.4087	0.0347338	1.10576	0.634403	0.0778961	1.10184	0.635702	-0.0431623	0.00391889	-0.00129867	6.9271	0.000187993	0.534038	0.294826	0.0516731	0.529464	0.28413	-0.0514851	0.00457382	0.0106956	5.8985	5.88518	2.50913	0.646674	5.87992	2.52211	0.759284	0.00525951	-0.0129726	-0.11261	6.3973	1.70276	0.912398	0.382194	1.69522	0.899854	0.383937	0.00753486	0.0125436	-0.00174281
5.8879	0.230079	3.14768	1.57399	0.221105	3.17309	1.64841	0.00897443	-0.0254054	-0.0744219	6.4094	0.0425608	1.10333	0.63177	0.0791009	1.10382	0.63921	-0.0365401	-0.000491738	-0.00744027	6.9279	0.0470979	0.536708	0.296136	0.0524819	0.530201	0.285342	-0.00538397	0.0065074	0.0107938	5.8993	5.87685	2.53052	0.647584	5.88665	2.5276	0.764362	-0.00980043	0.00292087	-0.116778	6.398	1.68484	0.917605	0.390884	1.69702	0.902117	0.385725	-0.0121886	0.0154877	0.00515947
5.8887	0.216259	3.14574	1.58941	0.224747	3.17838	1.65685	-0.00848722	-0.0326405	-0.0674393	6.4102	0.0497578	1.1012	0.632965	0.0804996	1.10556	0.6423	-0.0307418	-0.00435734	-0.0093354	6.9287	0.116198	0.538078	0.299036	0.0533038	0.531045	0.286736	0.0628941	0.00703359	0.0123005	5.9	5.8698	2.53197	0.669614	5.89255	2.5339	0.770215	-0.0227561	-0.00193048	-0.100601	6.3988	1.66011	0.918659	0.386633	1.69909	0.904101	0.387299	-0.0389837	0.0145574	-0.000665605
5.8894	0.212099	3.14522	1.59172	0.227982	3.18303	1.66427	-0.0158828	-0.0378017	-0.0725453	6.4109	0.0506848	1.10482	0.637963	0.0817482	1.10755	0.645848	-0.0310635	-0.00273061	-0.0078854	6.9294	0.157058	0.538498	0.302816	0.0540326	0.531784	0.28796	0.103025	0.00671411	0.0148561	5.9008	5.87314	2.53316	0.676924	5.89931	2.54022	0.776111	-0.0261712	-0.00705695	-0.0991874	6.3996	1.65282	0.911587	0.384118	1.70116	0.906373	0.389109	-0.0483427	0.00521356	-0.00499088
5.8902	0.213309	3.15975	1.59895	0.231748	3.18834	1.6728	-0.0184386	-0.0285897	-0.0738481	6.4117	0.0526798	1.11095	0.644734	0.0831972	1.10954	0.649413	-0.0305175	0.0014106	-0.00467902	6.9302	0.156648	0.540978	0.304786	0.0548768	0.53263	0.289365	0.101771	0.00834799	0.0154209	5.9015	5.87855	2.55049	0.675474	5.90523	2.54576	0.781302	-0.02668	0.00473499	-0.105829	6.4003	1.6641	0.909173	0.379248	1.70297	0.908368	0.390707	-0.0388756	0.000804842	-0.0114592
5.8909	0.208529	3.17358	1.62089	0.23509	3.19367	1.68137	-0.0265607	-0.0200858	-0.0604832	6.4124	0.0437098	1.11234	0.647541	0.0844847	1.11129	0.652548	-0.0407749	0.0010556	-0.00500703	6.9309	0.133088	0.543198	0.299186	0.0556276	0.533477	0.290776	0.0774604	0.00972128	0.00840998	5.9023	5.89083	2.55311	0.697304	5.91202	2.5521	0.787274	-0.0211892	0.00101328	-0.0899701	6.4011	1.67579	0.910527	0.383117	1.70505	0.910653	0.392547	-0.0292622	-0.000126541	-0.00942954
5.8917	0.211749	3.17105	1.63583	0.238962	3.19834	1.68891	-0.0272125	-0.0272822	-0.0530784	6.4132	0.0447338	1.11395	0.652377	0.0859792	1.11329	0.656156	-0.0412454	0.000660062	-0.00377887	6.9317	0.096928	0.540798	0.293746	0.0564991	0.53422	0.292019	0.0404289	0.00657821	0.00172746	5.9031	5.90952	2.56111	0.709544	5.91882	2.55767	0.792552	-0.00930357	0.00344467	-0.0830088	6.4018	1.68671	0.919259	0.390509	1.70687	0.912944	0.394399	-0.0201626	0.00631446	-0.0038901
5.8924	0.221159	3.18144	1.63774	0.242404	3.20368	1.69756	-0.0212443	-0.0222354	-0.0598209	6.414	0.0577498	1.11777	0.654913	0.0875044	1.1153	0.659783	-0.0297546	0.00247967	-0.00486982	6.9324	0.063278	0.538338	0.295596	0.0572718	0.53507	0.293445	0.00600612	0.00326777	0.00215125	5.9038	5.92916	2.57632	0.715404	5.92479	2.56405	0.798623	0.00436974	0.0122757	-0.0832188	6.4026	1.70276	0.929754	0.397709	1.70895	0.914953	0.39603	-0.00619555	0.0148008	0.00167942
5.8932	0.242869	3.19126	1.65847	0.24641	3.20836	1.70518	-0.00354028	-0.0170989	-0.0467042	6.4147	0.0563678	1.12622	0.663046	0.0888628	1.11705	0.662971	-0.0324951	0.00916648	7.50422e-05	6.9332	0.0472679	0.539258	0.302396	0.0581666	0.535815	0.294698	-0.0108987	0.00344276	0.0076983	5.9046	5.94459	2.58006	0.731004	5.93162	2.57044	0.804737	0.0129757	0.00962019	-0.0737333	6.4034	1.7052	0.934465	0.403115	1.71104	0.917254	0.397908	-0.00584352	0.0172106	0.0052067
5.894	0.264049	3.18488	1.67001	0.250478	3.21372	1.71392	0.013571	-0.0288382	-0.0439043	6.4155	0.0469438	1.13213	0.669398	0.0904381	1.11906	0.666633	-0.0434943	0.0130696	0.00276488	6.934	0.0396179	0.544498	0.309956	0.0590767	0.536669	0.296136	-0.0194588	0.00782967	0.0138198	5.9053	5.9492	2.59104	0.736114	5.93761	2.57605	0.810119	0.0115929	0.0149939	-0.0740051	6.4041	1.68854	0.933452	0.401047	1.71287	0.919274	0.399566	-0.0243328	0.0141776	0.00148147
5.8947	0.277469	3.19212	1.66578	0.254086	3.21909	1.7227	0.0233828	-0.0269699	-0.0569228	6.4162	0.0462218	1.13326	0.671429	0.0918357	1.12083	0.669858	-0.0456139	0.0124356	0.00157118	6.9347	0.0334679	0.551978	0.307076	0.0598869	0.537523	0.297583	-0.026419	0.0144551	0.00949275	5.9061	5.95193	2.59712	0.742604	5.94447	2.58248	0.816331	0.00745964	0.0146453	-0.0737269	6.4049	1.66628	0.929452	0.400274	1.71497	0.921588	0.401472	-0.0486894	0.00786388	-0.00119743
5.8955	0.286619	3.19912	1.68204	0.258272	3.2238	1.73043	0.0283475	-0.0246763	-0.048384	6.417	0.0476088	1.12721	0.670743	0.0934646	1.12285	0.67356	-0.0458558	0.00436807	-0.00281703	6.9355	0.0332979	0.552388	0.303956	0.0608249	0.538272	0.298855	-0.027527	0.014116	0.00510061	5.9069	5.95941	2.59884	0.752674	5.95136	2.58892	0.822584	0.00805759	0.00992489	-0.0699105	6.4056	1.66297	0.933076	0.401313	1.7168	0.923908	0.403391	-0.0538365	0.00916827	-0.00207797
5.8962	0.282689	3.1999	1.69549	0.26201	3.22919	1.7393	0.0206796	-0.0292854	-0.0438094	6.4178	0.0556978	1.12569	0.677151	0.0951247	1.12487	0.677284	-0.0394269	0.00081563	-0.000132918	6.9362	0.037118	0.549368	0.303796	0.0616559	0.539129	0.300314	-0.0245379	0.0102394	0.00348151	5.9076	5.96253	2.60938	0.759374	5.95739	2.59457	0.828094	0.00513649	0.0148141	-0.0687206	6.4064	1.67421	0.939276	0.406854	1.71891	0.925942	0.405083	-0.0447	0.0133334	0.00177115
5.897	0.275079	3.21219	1.70283	0.266336	3.23391	1.74711	0.00874376	-0.0217199	-0.0442778	6.4185	0.0963138	1.13179	0.684831	0.0965995	1.12664	0.680556	-0.000285715	0.00514364	0.00427443	6.937	0.0447979	0.543598	0.306046	0.0626203	0.539988	0.301781	-0.0178224	0.00361061	0.00426483	5.9084	5.95531	2.61682	0.772144	5.96431	2.60104	0.834435	-0.00899315	0.0157797	-0.0622919	6.4071	1.70311	0.945525	0.41333	1.72075	0.928274	0.407033	-0.017644	0.0172506	0.00629765
5.8978	0.267919	3.21998	1.72271	0.270731	3.23932	1.75607	-0.00281215	-0.0193353	-0.0333557	6.4193	0.136969	1.13439	0.689633	0.098311	1.12867	0.684321	0.0386578	0.0057137	0.00531167	6.9378	0.0578079	0.542198	0.310186	0.0636027	0.54074	0.303071	-0.00579476	0.00145817	0.00711489	5.9091	5.94423	2.62325	0.782314	5.97037	2.60672	0.84003	-0.0261455	0.0165293	-0.0577168	6.4079	1.71158	0.94584	0.41675	1.72286	0.930611	0.408995	-0.0112851	0.0152291	0.00775534
5.8985	0.252409	3.22914	1.7336	0.274627	3.24474	1.76507	-0.0222175	-0.0155921	-0.0314732	6.42	0.154123	1.13702	0.694848	0.0998348	1.13071	0.688108	0.054288	0.00630867	0.00673985	6.9385	0.064538	0.540528	0.310346	0.0644741	0.541602	0.304553	6.38962e-05	-0.00107336	0.00579321	5.9099	5.94195	2.6295	0.788344	5.97732	2.61323	0.846473	-0.035368	0.0162709	-0.0581291	6.4087	1.70691	0.941568	0.415877	1.72498	0.93266	0.410723	-0.0180715	0.00890744	0.00515407
5.8993	0.247519	3.24148	1.74662	0.279172	3.24948	1.77299	-0.031653	-0.0079999	-0.0263723	6.4208	0.162929	1.14199	0.701222	0.101609	1.13249	0.691437	0.0613199	0.00949645	0.00978476	6.9393	0.060228	0.540458	0.304566	0.0654835	0.542356	0.305855	-0.00525546	-0.00189829	-0.00128853	5.9106	5.94696	2.63482	0.796314	5.98342	2.61975	0.852958	-0.036458	0.0150695	-0.0566442	6.4094	1.71783	0.937767	0.409756	1.72683	0.935009	0.412713	-0.00900638	0.00275755	-0.00295681
5.9	0.250199	3.24379	1.75917	0.283208	3.25492	1.7821	-0.0330091	-0.0111275	-0.0229264	6.4215	0.16471	1.14547	0.707782	0.103185	1.13453	0.695259	0.0615248	0.0109328	0.0125233	6.94	0.0628979	0.539618	0.300006	0.0663787	0.54322	0.307348	-0.00348079	-0.00360203	-0.00734222	5.9114	5.9544	2.63943	0.801934	5.99039	2.62547	0.858671	-0.0359988	0.0139594	-0.0567369	6.4102	1.72696	0.937052	0.40967	1.72896	0.93707	0.41447	-0.00200057	-1.87159e-05	-0.0047996
5.9008	0.255509	3.25273	1.76326	0.287885	3.26037	1.79125	-0.0323757	-0.00763369	-0.0279856	6.4223	0.149224	1.14691	0.712696	0.105013	1.13632	0.698623	0.0442109	0.0105901	0.0140734	6.9408	0.0944879	0.539598	0.302106	0.0674206	0.544086	0.30885	0.0270673	-0.00448775	-0.00674438	5.9122	5.96371	2.64629	0.810894	5.9974	2.63203	0.865255	-0.033689	0.0142622	-0.0543611	6.4109	1.72753	0.941118	0.414682	1.73082	0.939431	0.41649	-0.00329304	0.00168616	-0.00180778
5.9015	0.263169	3.26104	1.77577	0.29203	3.26514	1.79929	-0.0288602	-0.00409603	-0.0235144	6.4231	0.111106	1.14837	0.715775	0.106874	1.13837	0.70249	0.00423154	0.00999439	0.0132844	6.9415	0.128628	0.545368	0.309276	0.0683447	0.544845	0.310172	0.0602832	0.000523567	-0.000896096	5.9129	5.97906	2.65665	0.822254	6.00354	2.63778	0.871063	-0.024487	0.0188704	-0.0488098	6.4117	1.71564	0.947112	0.42055	1.73295	0.941797	0.418523	-0.0173155	0.00531471	0.00202674
5.9023	0.282379	3.26863	1.79023	0.296863	3.2706	1.80851	-0.0144835	-0.001966	-0.0182811	6.4238	0.0868948	1.14806	0.717945	0.108537	1.14043	0.706379	-0.0216425	0.00763893	0.011566	6.9423	0.134238	0.549238	0.315136	0.0694144	0.545713	0.311689	0.0648235	0.00352502	0.00344706	5.9137	5.99122	2.66784	0.834204	6.01058	2.64437	0.877745	-0.0193563	0.0234704	-0.043541	6.4124	1.70138	0.949966	0.42302	1.73482	0.943872	0.420315	-0.0334451	0.00609356	0.00270545
5.9031	0.304359	3.28133	1.80506	0.301775	3.27539	1.81664	0.00258482	0.00594378	-0.0115811	6.4246	0.0856938	1.14728	0.719547	0.110465	1.14223	0.709796	-0.0247714	0.00505459	0.0097506	6.9431	0.118298	0.550948	0.319676	0.0705006	0.546583	0.313213	0.0477973	0.00436497	0.00646305	5.9144	5.99537	2.67606	0.846904	6.01675	2.65098	0.884475	-0.0213809	0.0250845	-0.037571	6.4132	1.70278	0.950634	0.423432	1.73696	0.946252	0.422381	-0.0341864	0.00438195	0.00105107
5.9038	0.325359	3.28765	1.82039	0.306132	3.28087	1.82597	0.019227	0.00678015	-0.00558221	6.4253	0.107369	1.14346	0.718022	0.112176	1.14428	0.713721	-0.00480756	-0.000822902	0.00430048	6.9438	0.098238	0.551418	0.325976	0.0714687	0.547345	0.314552	0.0267693	0.0040729	0.0114241	5.9152	5.99429	2.68214	0.856234	6.02383	2.65677	0.890406	-0.0295396	0.0253718	-0.0341721	6.414	1.71449	0.956121	0.429746	1.73911	0.948637	0.424462	-0.0246229	0.00748336	0.00528395
5.9046	0.338539	3.29241	1.82892	0.311185	3.28637	1.83535	0.0273539	0.00604725	-0.00642967	6.4261	0.146407	1.14097	0.71699	0.114164	1.14609	0.71718	0.0322424	-0.00512457	-0.000190496	6.9446	0.089258	0.555888	0.335806	0.0725901	0.548218	0.31609	0.0166678	0.0076704	0.0197155	5.9159	5.98878	2.68944	0.863504	6.03004	2.66341	0.897239	-0.0412636	0.0260341	-0.033735	6.4147	1.71355	0.963523	0.436577	1.74099	0.950729	0.426295	-0.027445	0.0127937	0.0102824
5.9053	0.341749	3.29648	1.83769	0.315687	3.29118	1.84359	0.0260625	0.00530481	-0.00589728	6.4269	0.18914	1.1432	0.71826	0.116196	1.14816	0.721152	0.0729435	-0.00496304	-0.00289202	6.9453	0.0863279	0.562568	0.342476	0.073584	0.548983	0.317443	0.0127439	0.0135856	0.0250329	5.9167	5.99003	2.69724	0.873214	6.03715	2.67007	0.904126	-0.0471253	0.0271778	-0.0309124	6.4155	1.70838	0.968153	0.439404	1.74315	0.953126	0.428403	-0.0347707	0.0150272	0.0110007
5.9061	0.346089	3.29724	1.8462	0.32091	3.29669	1.85307	0.0251797	0.000551701	-0.00686514	6.4276	0.199307	1.15041	0.726145	0.118002	1.15023	0.725145	0.0813048	0.000182867	0.00100029	6.9461	0.097068	0.566038	0.343086	0.0747359	0.549858	0.318996	0.0223321	0.01618	0.0240901	5.9175	5.99913	2.70548	0.885514	6.04428	2.6759	0.91019	-0.0451565	0.0295806	-0.0246763	6.4162	1.70371	0.967669	0.44095	1.74504	0.955228	0.430264	-0.0413295	0.0124402	0.010686
5.9069	0.354299	3.3002	1.85293	0.326217	3.30221	1.86259	0.028082	-0.00200748	-0.00965428	6.4284	0.183772	1.15769	0.733585	0.120097	1.15205	0.728654	0.0636749	0.00564337	0.00493097	6.9469	0.116738	0.565958	0.342876	0.0759088	0.550735	0.320556	0.0408292	0.0152233	0.02232	5.9182	6.01126	2.71556	0.897304	6.05055	2.68259	0.91717	-0.0392876	0.0329721	-0.0198662	6.417	1.70623	0.962424	0.439159	1.7472	0.957636	0.432405	-0.0409733	0.00478733	0.0067547
5.9076	0.362559	3.30305	1.86295	0.330923	3.30705	1.87096	0.0316366	-0.00399637	-0.00800443	6.4291	0.155642	1.16044	0.735436	0.121957	1.15413	0.732693	0.033685	0.00631404	0.00274336	6.9476	0.125358	0.566518	0.344516	0.0769511	0.551504	0.321929	0.0484068	0.0150144	0.0225871	5.919	6.01805	2.72155	0.908104	6.05772	2.68846	0.923336	-0.0396743	0.0330923	-0.0152323	6.4178	1.72584	0.961596	0.437965	1.74937	0.960052	0.434561	-0.0235329	0.001544	0.00340378
5.9084	0.356339	3.31049	1.87286	0.336397	3.31259	1.88057	0.019942	-0.00209522	-0.00770593	6.4299	0.146091	1.15475	0.73627	0.124128	1.15621	0.73675	0.0219623	-0.00146079	-0.000480413	6.9484	0.107078	0.569288	0.348276	0.0781579	0.552384	0.323505	0.0289201	0.0169044	0.0247712	5.9197	6.01692	2.72945	0.914904	6.06402	2.69518	0.930423	-0.0471015	0.0342729	-0.0155194	6.4185	1.74811	0.968081	0.445254	1.75127	0.962169	0.43646	-0.00316525	0.00591171	0.00879419
5.9091	0.348429	3.31556	1.88462	0.341272	3.31744	1.88902	0.00715697	-0.00188112	-0.004403	6.4306	0.152293	1.15513	0.742466	0.126058	1.15804	0.740319	0.0262344	-0.00290501	0.00214672	6.9491	0.095318	0.571478	0.346086	0.0792267	0.553265	0.325087	0.0160912	0.0182135	0.0209988	5.9205	6.01229	2.73745	0.921364	6.07123	2.70192	0.937566	-0.0589371	0.0355322	-0.0162027	6.4193	1.76007	0.973025	0.455653	1.75345	0.964597	0.438649	0.00661612	0.00842792	0.0170044
5.9099	0.340179	3.3195	1.89545	0.34692	3.323	1.89874	-0.00674021	-0.00350142	-0.00328791	6.4314	0.157124	1.15845	0.752443	0.128296	1.16013	0.744419	0.0288278	-0.00167775	0.00802398	6.9499	0.121608	0.571578	0.341856	0.0804715	0.554037	0.326478	0.0411364	0.0175414	0.0153782	5.9213	6.0119	2.74617	0.933324	6.07847	2.70783	0.943853	-0.0665665	0.0383439	-0.0105298	6.42	1.76608	0.97744	0.462128	1.75536	0.967031	0.440855	0.0107157	0.0104086	0.021273
5.9106	0.343319	3.32296	1.9043	0.351926	3.32857	1.9085	-0.00860667	-0.00560808	-0.00419474	6.4322	0.163596	1.1582	0.755492	0.130572	1.16196	0.748029	0.0330234	-0.0037601	0.0074631	6.9506	0.131648	0.562528	0.331636	0.0815769	0.554921	0.328077	0.050071	0.00760698	0.00355911	5.922	6.02965	2.75217	0.943264	6.08482	2.7146	0.95111	-0.0551744	0.0375683	-0.00784659	6.4208	1.77488	0.982098	0.473087	1.75755	0.969166	0.442798	0.0173267	0.012932	0.0302889
5.9114	0.354199	3.32703	1.91204	0.357747	3.33345	1.91707	-0.00354815	-0.0064168	-0.00503194	6.4329	0.161008	1.15617	0.760036	0.132605	1.16406	0.752176	0.0284031	-0.00789511	0.00786018	6.9514	0.092628	0.551348	0.320196	0.0828561	0.555696	0.329483	0.00977194	-0.00434804	-0.00928664	5.9228	6.04295	2.7562	0.946944	6.09211	2.7214	0.958421	-0.0491605	0.0348053	-0.0114768	6.4215	1.78824	0.984883	0.484788	1.75947	0.97161	0.445033	0.0287675	0.0132731	0.0397551
5.9122	0.369569	3.33362	1.92121	0.363679	3.33904	1.92693	0.00589037	-0.00541544	-0.00572145	6.4337	0.157085	1.15758	0.768171	0.134965	1.16616	0.756345	0.0221201	-0.00858223	0.011826	6.9522	0.049938	0.548008	0.319416	0.0841548	0.556583	0.331096	-0.0342169	-0.0085752	-0.0116799	5.9235	6.04821	2.75953	0.952544	6.09849	2.72735	0.964858	-0.0502834	0.0321784	-0.0123146	6.4223	1.78522	0.988568	0.491313	1.76167	0.973755	0.447003	0.0235503	0.0148131	0.0443102
5.9129	0.389249	3.34373	1.93328	0.368944	3.34394	1.93561	0.0203058	-0.000204563	-0.00232577	6.4344	0.155302	1.16124	0.771492	0.13706	1.16801	0.760009	0.0182414	-0.00676382	0.0114832	6.9529	0.0329679	0.553178	0.326016	0.0853099	0.557471	0.332716	-0.0523419	-0.00429296	-0.0066998	5.9243	6.05596	2.76133	0.968214	6.10582	2.73417	0.972262	-0.0498648	0.0271583	-0.00404859	6.4231	1.773	0.991766	0.494865	1.76387	0.976213	0.449274	0.00912666	0.0155526	0.0455909
5.9137	0.401989	3.35149	1.94957	0.375046	3.34955	1.94556	0.0269431	0.00194836	0.00400674	6.4352	0.153865	1.16294	0.778404	0.139493	1.17012	0.764221	0.0143713	-0.00717139	0.0141829	6.9537	0.0332379	0.556028	0.327136	0.0866507	0.55825	0.334141	-0.0534128	-0.00222158	-0.0070051	5.925	6.06045	2.76743	0.988574	6.11226	2.74016	0.978799	-0.0518031	0.0272717	0.00977445	6.4238	1.75354	0.993452	0.497231	1.7658	0.978678	0.451561	-0.0122665	0.0147738	0.0456705
5.9144	0.406609	3.35815	1.96362	0.380468	3.35516	1.95557	0.0261408	0.00299168	0.00804996	6.4359	0.161029	1.1658	0.785411	0.141666	1.17223	0.768461	0.0193631	-0.00643444	0.0169504	6.9544	0.0267279	0.555588	0.328116	0.0878397	0.559141	0.335778	-0.0611118	-0.00355315	-0.00766253	5.9258	6.06666	2.77412	1.00273	6.11963	2.74702	0.986326	-0.0529637	0.027101	0.0164075	6.4246	1.74395	0.99256	0.49715	1.76802	0.980839	0.453574	-0.0240711	0.0117209	0.0435765
5.9152	0.409649	3.36067	1.97587	0.38678	3.36008	1.96437	0.0228696	0.000589371	0.0115023	6.4367	0.169837	1.16888	0.787684	0.144187	1.17408	0.772188	0.0256501	-0.00520372	0.0154964	6.9552	0.0183179	0.557878	0.332316	0.0892172	0.559923	0.337217	-0.0708992	-0.00204444	-0.00490117	5.9266	6.07884	2.7793	1.00397	6.12702	2.7539	0.993908	-0.0481873	0.025404	0.0100656	6.4253	1.74674	0.990883	0.491035	1.76996	0.983314	0.45589	-0.0232224	0.00756907	0.0351444
5.9159	0.411469	3.36597	1.98351	0.392382	3.36572	1.97448	0.0190877	0.000255108	0.0090338	6.4375	0.170571	1.17111	0.786236	0.146752	1.17621	0.776469	0.0238193	-0.00509584	0.00976729	6.9559	0.0198179	0.562728	0.336016	0.0904422	0.560817	0.338869	-0.0706242	0.0019114	-0.00285268	5.9273	6.08328	2.78789	1.00432	6.13352	2.75993	1.00058	-0.0502324	0.0279644	0.00374103	6.4261	1.76522	0.987812	0.485996	1.77218	0.985487	0.457937	-0.00696504	0.00232482	0.0280586
5.9167	0.410839	3.36902	1.99543	0.398872	3.37137	1.98464	0.0119678	-0.00234222	0.0107895	6.4382	0.154913	1.17737	0.789836	0.149027	1.17807	0.780235	0.0058856	-0.000690818	0.009601	6.9567	0.0462379	0.563008	0.333456	0.0918635	0.561713	0.340529	-0.0456256	0.00129557	-0.00707293	5.9281	6.08231	2.79769	1.01263	6.14097	2.76684	1.00828	-0.0586548	0.0308528	0.00435734	6.4269	1.79197	0.987572	0.482124	1.77441	0.987976	0.460291	0.0175531	-0.000404537	0.0218339
5.9175	0.415979	3.37422	2.00739	0.405466	3.37631	1.99357	0.0105129	-0.0020895	0.0138181	6.439	0.134829	1.17965	0.798	0.151681	1.18019	0.784563	-0.0168524	-0.00054884	0.0134373	6.9575	0.084978	0.556908	0.333466	0.0933068	0.562498	0.341989	-0.0083288	-0.00558972	-0.00852346	5.9288	6.08964	2.80592	1.02313	6.1475	2.77377	1.01603	-0.0578632	0.0321546	0.00710249	6.4276	1.79286	0.992041	0.480864	1.77637	0.990472	0.462661	0.0164866	0.00156915	0.0182034
5.9182	0.430569	3.38201	2.02006	0.411357	3.38198	2.00383	0.0192124	3.52859e-05	0.0162313	6.4397	0.123908	1.18071	0.801381	0.154045	1.18233	0.788916	-0.0301373	-0.00161517	0.0124646	6.9582	0.129628	0.555928	0.334756	0.0945857	0.563396	0.343665	0.0350423	-0.00746775	-0.00890863	5.9296	6.10368	2.81451	1.0304	6.15499	2.77985	1.02287	-0.0513115	0.0346673	0.00753784	6.4284	1.76003	0.999658	0.482473	1.77861	0.99266	0.464748	-0.0185848	0.00699818	0.0177248
5.919	0.432479	3.38793	2.03235	0.418178	3.38695	2.01286	0.0143013	0.000988007	0.0194888	6.4405	0.116521	1.1797	0.803879	0.156785	1.1842	0.792743	-0.0402641	-0.0044992	0.0111363	6.959	0.172678	0.559198	0.335606	0.0960708	0.564296	0.345349	0.0766072	-0.0050981	-0.00974286	5.9303	6.12483	2.8208	1.03947	6.16158	2.78681	1.03073	-0.0367541	0.0339949	0.008744	6.4291	1.73852	1.00414	0.479534	1.78058	0.995169	0.467156	-0.0420598	0.00897032	0.0123779
5.9197	0.428829	3.39313	2.04144	0.424228	3.39263	2.02322	0.00460148	0.000505924	0.0182176	6.4413	0.122259	1.1879	0.810363	0.159572	1.18634	0.79714	-0.0373135	0.00156009	0.0132231	6.9597	0.185898	0.561578	0.337986	0.0973933	0.565085	0.346829	0.0885047	-0.00350666	-0.00884271	5.9311	6.13879	2.82434	1.05907	6.16913	2.79291	1.03766	-0.0303383	0.0314283	0.0214133	6.4299	1.74095	1.00136	0.475053	1.78283	0.997682	0.469579	-0.0418832	0.00367761	0.00547352
5.9205	0.436849	3.40175	2.0506	0.431241	3.39832	2.03364	0.00560796	0.00343037	0.016959	6.442	0.149854	1.19525	0.816726	0.162054	1.18822	0.801013	-0.0122003	0.0070312	0.0157131	6.9605	0.166268	0.564228	0.341906	0.0989232	0.565988	0.34853	0.0673448	-0.00176001	-0.0066241	5.9319	6.15062	2.829	1.08696	6.1767	2.79992	1.04565	-0.0260878	0.0290875	0.0413136	6.4306	1.7463	1.00495	0.478802	1.78481	0.999887	0.471714	-0.03851	0.00506437	0.00708717
5.9213	0.448259	3.41291	2.06379	0.438406	3.40331	2.04279	0.00985312	0.00960064	0.0209966	6.4428	0.173852	1.19324	0.812888	0.164944	1.19037	0.80546	0.00890791	0.00286853	0.00742817	6.9613	0.130478	0.568748	0.351056	0.100477	0.56678	0.350025	0.0300012	0.00196838	0.00103092	5.9326	6.15606	2.83616	1.10348	6.18335	2.80693	1.05369	-0.0272932	0.0292342	0.0497904	6.4314	1.76438	1.01441	0.485566	1.78707	1.00241	0.474172	-0.0226927	0.0119967	0.0113944
5.922	0.465549	3.42095	2.07812	0.444768	3.40903	2.05333	0.0207813	0.0119243	0.0247958	6.4435	0.172073	1.19113	0.813285	0.167511	1.19252	0.809928	0.00456157	-0.00138879	0.00335729	6.962	0.115688	0.571998	0.358396	0.101855	0.567686	0.351741	0.0138332	0.00431275	0.00665486	5.9334	6.1528	2.84361	1.10692	6.19098	2.81308	1.06078	-0.0381808	0.0305316	0.0461438	6.4322	1.7935	1.01668	0.4898	1.78934	1.00463	0.47634	0.0041573	0.0120493	0.0134602
5.9228	0.478129	3.42491	2.08993	0.45214	3.41476	2.06391	0.0259891	0.0101576	0.0260227	6.4443	0.177012	1.18762	0.817817	0.170491	1.19441	0.813857	0.00652099	-0.0067879	0.00395989	6.9628	0.120808	0.575178	0.363326	0.103459	0.568593	0.353464	0.0173494	0.0065856	0.00986183	5.9341	6.15399	2.85391	1.11345	6.19769	2.82013	1.06894	-0.0436954	0.0337815	0.0445168	6.4329	1.80439	1.01568	0.490665	1.79133	1.00717	0.478836	0.013055	0.0085063	0.0118288
5.9235	0.481759	3.42563	2.09642	0.458674	3.41977	2.07321	0.0230857	0.00586033	0.0232127	6.445	0.200508	1.1853	0.820095	0.173144	1.19657	0.818379	0.0273642	-0.0112711	0.00171566	6.9635	0.116158	0.577738	0.370516	0.104881	0.569388	0.354982	0.0112767	0.00835013	0.0155343	5.9349	6.15817	2.86543	1.12472	6.20537	2.82632	1.07614	-0.0472059	0.0391142	0.0485809	6.4337	1.80449	1.02184	0.496455	1.79361	1.00972	0.48135	0.0108715	0.0121248	0.0151052
5.9243	0.486679	3.42678	2.10473	0.466298	3.42551	2.08388	0.0203813	0.00127029	0.0208497	6.4458	0.206385	1.18088	0.824743	0.176231	1.19874	0.822925	0.030154	-0.0178561	0.00181746	6.9643	0.0879279	0.579818	0.373396	0.106529	0.570299	0.356723	-0.0186011	0.00951958	0.0166726	5.9357	6.1599	2.87478	1.13272	6.21309	2.83341	1.08443	-0.053194	0.0413766	0.0482936	6.4344	1.80433	1.02582	0.503161	1.79562	1.01195	0.483563	0.00870955	0.013869	0.0195983
5.925	0.493929	3.43235	2.11542	0.473068	3.43055	2.09328	0.0208614	0.00180483	0.0221426	6.4466	0.186075	1.18213	0.82615	0.179372	1.20063	0.826922	0.00670296	-0.0185062	-0.000771761	6.965	0.0504079	0.581428	0.366256	0.107991	0.571211	0.358473	-0.0575829	0.0102174	0.0077827	5.9364	6.15055	2.88225	1.13647	6.21987	2.84051	1.09278	-0.0693188	0.0417407	0.0436954	6.4352	1.80727	1.02563	0.505529	1.79791	1.01451	0.486112	0.00935507	0.011125	0.0194168
5.9258	0.499119	3.4384	2.13143	0.480909	3.43631	2.10407	0.0182108	0.00208998	0.0273583	6.4473	0.161238	1.18538	0.831497	0.18216	1.20281	0.831512	-0.0209222	-0.0174303	-1.54972e-05	6.9658	0.0614779	0.580528	0.358136	0.109691	0.57201	0.36001	-0.048213	0.00851822	-0.00187433	5.9372	6.13877	2.88893	1.14778	6.22765	2.84674	1.10013	-0.0888801	0.0421922	0.0476575	6.4359	1.81987	1.02556	0.508834	1.79993	1.01708	0.488684	0.019941	0.00848126	0.0201505
5.9266	0.516929	3.44563	2.14564	0.488877	3.44209	2.11492	0.0280527	0.00354481	0.0307202	6.4481	0.145798	1.18942	0.837006	0.185401	1.20471	0.835555	-0.0396035	-0.0152879	0.00145125	6.9666	0.0717479	0.578968	0.357306	0.111417	0.572925	0.361777	-0.0396695	0.00604367	-0.00447059	5.9379	6.13634	2.89487	1.16187	6.23448	2.85388	1.1086	-0.0981421	0.0409937	0.0532713	6.4367	1.8373	1.02801	0.510935	1.80223	1.01933	0.490949	0.0350639	0.00868559	0.019986
5.9273	0.537249	3.45358	2.15764	0.495975	3.44715	2.12445	0.0412745	0.00643492	0.0331895	6.4488	0.142	1.19991	0.840523	0.188298	1.20689	0.840196	-0.0462979	-0.00698435	0.00032711	6.9673	0.0444779	0.574888	0.359776	0.112948	0.573726	0.36333	-0.0684698	0.00116181	-0.00355411	5.9387	6.14856	2.90079	1.17209	6.24232	2.86104	1.11715	-0.0937552	0.0397522	0.0549471	6.4375	1.848	1.02881	0.510244	1.80455	1.0219	0.493555	0.0434493	0.0069052	0.0166895
5.9281	0.541159	3.46258	2.16868	0.504216	3.45294	2.13541	0.0369431	0.00964069	0.0332737	6.4496	0.147511	1.20533	0.840152	0.191655	1.20908	0.844864	-0.0441446	-0.00375104	-0.00471246	6.9681	0.0143679	0.569518	0.361876	0.114721	0.574645	0.365113	-0.100353	-0.00512624	-0.00323725	5.9394	6.16453	2.90611	1.1791	6.2492	2.86732	1.12467	-0.0846691	0.038794	0.0544329	6.4382	1.84189	1.03435	0.514335	1.80658	1.02417	0.495852	0.0353091	0.0101819	0.0184823
5.9288	0.537569	3.4739	2.18312	0.511528	3.45875	2.14642	0.0260409	0.0151577	0.0367007	6.4503	0.165434	1.2096	0.844833	0.194636	1.21099	0.848967	-0.0292022	-0.00139427	-0.00413418	6.9688	0.0358579	0.568198	0.364936	0.116303	0.575564	0.366905	-0.0804447	-0.0073657	-0.00196874	5.9402	6.17419	2.91256	1.18939	6.2571	2.87451	1.13333	-0.0829082	0.0380502	0.0560639	6.439	1.82212	1.04011	0.521622	1.80891	1.02676	0.498498	0.0132103	0.0133489	0.0231246
5.9296	0.541519	3.48143	2.20028	0.520003	3.46383	2.15611	0.0215164	0.0176001	0.0441761	6.4511	0.193832	1.21198	0.851667	0.198099	1.21319	0.853687	-0.0042671	-0.00120616	-0.00201988	6.9696	0.0635979	0.571868	0.365856	0.118134	0.57637	0.36848	-0.054536	-0.00450158	-0.00262427	5.941	6.18323	2.91992	1.19896	6.26504	2.88082	1.14097	-0.0818124	0.0390985	0.0579932	6.4397	1.79969	1.04345	0.522482	1.81095	1.02936	0.501164	-0.0112633	0.0140991	0.0213177
5.9303	0.561299	3.48287	2.21067	0.527562	3.46966	2.16723	0.0337371	0.0132155	0.0434463	6.4519	0.205453	1.21516	0.856306	0.201638	1.21539	0.858432	0.00381434	-0.000230074	-0.00212586	6.9703	0.070298	0.577928	0.367726	0.119757	0.577292	0.37029	-0.0494593	0.000636101	-0.00256407	5.9417	6.19371	2.92401	1.20514	6.27201	2.88806	1.14977	-0.0783081	0.0359566	0.0553753	6.4405	1.77771	1.04816	0.523419	1.81329	1.03163	0.503511	-0.0355835	0.0165256	0.019908
5.9311	0.590079	3.48331	2.21701	0.536327	3.47476	2.177	0.0537518	0.0085516	0.04001	6.4526	0.194801	1.21922	0.861782	0.204784	1.21731	0.862606	-0.00998363	0.00190747	-0.000823736	6.9711	0.0874579	0.581338	0.370856	0.121638	0.578216	0.372107	-0.0341797	0.00312233	-0.00125146	5.9425	6.20317	2.92707	1.21007	6.28001	2.8953	1.15863	-0.0768485	0.0317709	0.0514481	6.4413	1.76535	1.053	0.531307	1.81564	1.03425	0.506214	-0.0502925	0.0187557	0.0250934
5.9319	0.620389	3.48833	2.22457	0.545236	3.48061	2.18824	0.0751536	0.00772619	0.0363302	6.4534	0.185028	1.21665	0.866347	0.208434	1.21952	0.8674	-0.0234064	-0.00286531	-0.00105298	6.9719	0.103058	0.581748	0.381346	0.123555	0.579026	0.373705	-0.0204968	0.00272274	0.00764132	5.9432	6.20274	2.93082	1.22156	6.28705	2.90166	1.16643	-0.0843177	0.0291646	0.0551362	6.442	1.77939	1.05639	0.53585	1.8177	1.03654	0.5086	-0.038314	0.019858	0.0272495
5.9326	0.631399	3.49649	2.2368	0.553134	3.48646	2.19953	0.0782654	0.0100331	0.0372715	6.4541	0.175283	1.2119	0.869749	0.211675	1.22145	0.871618	-0.0363919	-0.00954759	-0.00186872	6.9726	0.114378	0.580328	0.383826	0.125257	0.579952	0.37554	-0.0108795	0.000375748	0.00828636	5.944	6.20555	2.93835	1.23552	6.29513	2.90894	1.17542	-0.0895796	0.0294087	0.0601029	6.4428	1.80088	1.05516	0.529717	1.82007	1.03916	0.511344	-0.0191884	0.0160005	0.0183722
5.9334	0.623559	3.50497	2.24823	0.562323	3.49159	2.20946	0.061236	0.0133824	0.0387764	6.4549	0.160402	1.20877	0.876321	0.215456	1.22366	0.876467	-0.0550546	-0.0148938	-0.000146508	6.9734	0.126248	0.580028	0.380256	0.127229	0.580765	0.377154	-0.000980973	-0.000736713	0.00310171	5.9448	6.21631	2.94794	1.24722	6.30324	2.91625	1.18449	-0.0869327	0.0316913	0.0627325	6.4435	1.81468	1.05182	0.527688	1.82214	1.04179	0.514107	-0.00746322	0.0100305	0.0135814
5.9341	0.612439	3.51401	2.2604	0.570507	3.49746	2.22085	0.0419319	0.0165486	0.0395477	6.4557	0.163687	1.21112	0.885733	0.219304	1.22588	0.881343	-0.0556174	-0.0147622	0.00438988	6.9741	0.147558	0.586658	0.384566	0.128975	0.581695	0.379007	0.0185828	0.00496316	0.00555885	5.9455	6.22577	2.95951	1.25855	6.31036	2.92266	1.19248	-0.0845895	0.0368538	0.0660732	6.4443	1.81569	1.05375	0.52994	1.82452	1.0441	0.516541	-0.0088309	0.00965369	0.0133988
5.9349	0.612709	3.52854	2.27538	0.579983	3.50262	2.23089	0.0327266	0.0259275	0.0444896	6.4564	0.191686	1.21573	0.891542	0.222721	1.22783	0.885628	-0.0310354	-0.012096	0.00591373	6.9749	0.164958	0.589758	0.390096	0.131008	0.582626	0.380868	0.0339502	0.00713205	0.00922835	5.9463	6.2373	2.96916	1.26959	6.31855	2.93	1.20167	-0.0812535	0.0391669	0.0679257	6.445	1.82789	1.0568	0.532731	1.82661	1.04674	0.519349	0.0012815	0.0100521	0.0133829
5.9357	0.617589	3.54014	2.2914	0.589612	3.50851	2.24241	0.0279772	0.0316319	0.0489881	6.4572	0.232755	1.21301	0.891932	0.226689	1.23005	0.89055	0.00606626	-0.0170418	0.00138187	6.9757	0.197358	0.586538	0.392686	0.133073	0.583443	0.382505	0.0642844	0.00309539	0.0101814	5.947	6.25649	2.97691	1.28071	6.32575	2.93643	1.20977	-0.0692658	0.0404787	0.0709441	6.4458	1.83142	1.05627	0.535573	1.829	1.0494	0.522177	0.0024184	0.00687408	0.0133964
5.9364	0.618509	3.54736	2.30437	0.598168	3.51442	2.25399	0.0203408	0.0329456	0.0503793	6.4579	0.267755	1.21204	0.895961	0.230231	1.23228	0.895508	0.037524	-0.0202409	0.000452518	6.9764	0.211868	0.585628	0.392816	0.134905	0.584377	0.384384	0.0769627	0.00125098	0.00843179	5.9478	6.26814	2.98461	1.29212	6.33401	2.94381	1.21911	-0.0658731	0.0407984	0.073014	6.4466	1.82213	1.05894	0.538727	1.8314	1.05172	0.524667	-0.00927424	0.00722253	0.0140601
5.9372	0.616519	3.54935	2.31294	0.608128	3.51959	2.26416	0.0083909	0.0297623	0.0487776	6.4587	0.282583	1.21168	0.898418	0.234344	1.23424	0.899868	0.0482385	-0.0225551	-0.00145018	6.9772	0.189148	0.592088	0.390026	0.137028	0.585196	0.386037	0.0521203	0.00689197	0.00398934	5.9485	6.26811	2.99158	1.30402	6.34127	2.95121	1.22852	-0.0731668	0.0403707	0.0755048	6.4473	1.79798	1.05845	0.539007	1.83351	1.05439	0.527533	-0.0355321	0.00406957	0.0114739
5.9379	0.620459	3.55211	2.32245	0.616969	3.52552	2.27586	0.00349021	0.0265975	0.046591	6.4594	0.280344	1.20999	0.905497	0.237997	1.23648	0.904875	0.0423464	-0.0264816	0.000622034	6.9779	0.166938	0.593908	0.392496	0.138915	0.586134	0.387934	0.028023	0.00777435	0.00456226	5.9493	6.27172	2.99548	1.31541	6.34962	2.9577	1.2368	-0.0778995	0.0377836	0.0786099	6.4481	1.77136	1.05788	0.538812	1.83593	1.05672	0.530062	-0.0645697	0.00115466	0.0087499
5.9387	0.637439	3.55943	2.33633	0.627218	3.53145	2.28762	0.0102215	0.0279799	0.0487089	6.4602	0.282181	1.21558	0.9135	0.242236	1.23844	0.909276	0.0399446	-0.022856	0.00422406	6.9787	0.150288	0.589688	0.395306	0.141106	0.587073	0.38984	0.00918162	0.00261545	0.00546646	5.9501	6.27514	3.00223	1.32523	6.358	2.96513	1.24634	-0.0828691	0.0371015	0.0788939	6.4488	1.76462	1.06533	0.544295	1.83805	1.0594	0.532972	-0.0734339	0.00592744	0.0113229
5.9394	0.661559	3.56328	2.34891	0.636325	3.53666	2.29796	0.0252348	0.0266271	0.0509527	6.461	0.294489	1.22008	0.915062	0.246565	1.24069	0.914341	0.0479238	-0.0206085	0.000721097	6.9794	0.115698	0.591048	0.396496	0.143049	0.587896	0.391517	-0.0273515	0.00315213	0.00497901	5.9508	6.2773	3.00951	1.33784	6.36538	2.97165	1.25476	-0.0880795	0.0378585	0.0830791	6.4496	1.77689	1.06804	0.54587	1.84049	1.06209	0.535904	-0.0635991	0.00594997	0.00996625
5.9402	0.678729	3.56767	2.36045	0.646919	3.54261	2.30983	0.0318105	0.0250607	0.0506237	6.4617	0.307636	1.2221	0.920326	0.250421	1.24294	0.91943	0.0572147	-0.0208387	0.000896096	6.9802	0.0989779	0.596048	0.400396	0.1453	0.588838	0.393441	-0.0463217	0.00721025	0.00695479	5.9516	6.28564	3.01531	1.34748	6.37384	2.97912	1.26445	-0.0882072	0.036191	0.0830359	6.4503	1.79548	1.06843	0.548546	1.84262	1.06444	0.538485	-0.0471458	0.00399375	0.0100609
5.941	0.691109	3.57573	2.3719	0.657686	3.54783	2.32027	0.0334231	0.0278993	0.0516295	6.4625	0.315984	1.22282	0.922241	0.254893	1.24491	0.923906	0.0610908	-0.0220917	-0.00166488	6.981	0.091398	0.596128	0.409746	0.147588	0.589782	0.395376	-0.0561903	0.00634646	0.0143702	5.9523	6.29533	3.02223	1.35763	6.3813	2.98661	1.27421	-0.0859694	0.03562	0.0834255	6.4511	1.82071	1.06817	0.547637	1.84507	1.06714	0.541462	-0.0243657	0.00103283	0.00617552
5.9417	0.699869	3.57869	2.38187	0.667236	3.55381	2.33227	0.0326331	0.0248804	0.0496023	6.4632	0.322862	1.22388	0.921859	0.258861	1.24717	0.929048	0.0640008	-0.0232906	-0.0071888	6.9817	0.102078	0.596818	0.412496	0.149626	0.590609	0.397075	-0.0475485	0.00620961	0.0154212	5.9531	6.29735	3.02695	1.36918	6.38986	2.99318	1.2828	-0.0925055	0.0337739	0.0863845	6.4519	1.8401	1.07507	0.55275	1.84753	1.06984	0.54446	-0.00743806	0.00522184	0.00829035
5.9425	0.704519	3.5834	2.38966	0.678316	3.5598	2.34432	0.0262038	0.0236058	0.045342	6.464	0.321953	1.22773	0.924237	0.263489	1.24915	0.933576	0.0584637	-0.0214213	-0.00933862	6.9825	0.150948	0.598698	0.407086	0.151986	0.591556	0.399029	-0.00103796	0.00714231	0.00805736	5.9538	6.30681	3.03247	1.37729	6.39738	3.00071	1.29272	-0.0905709	0.0317626	0.0845776	6.4526	1.83477	1.08405	0.561827	1.8497	1.07222	0.547103	-0.0149298	0.0118356	0.0147241
5.9432	0.708149	3.58594	2.39926	0.688212	3.56504	2.35491	0.0199375	0.0208993	0.0443487	6.4648	0.31003	1.23271	0.928236	0.268201	1.25142	0.938777	0.0418286	-0.0187092	-0.0105411	6.9832	0.166818	0.596188	0.407826	0.154076	0.592386	0.400746	0.0127416	0.00380254	0.00707984	5.9546	6.32324	3.04308	1.39024	6.40602	3.00826	1.30271	-0.0827813	0.0348225	0.087538	6.4534	1.82812	1.08385	0.566283	1.85218	1.07494	0.550143	-0.0240588	0.00891471	0.0161399
5.944	0.718579	3.58819	2.40945	0.699665	3.57105	2.36709	0.0189139	0.017139	0.0423613	6.4655	0.307971	1.238	0.930764	0.27239	1.25369	0.944003	0.0355808	-0.0156898	-0.0132391	6.984	0.146188	0.595088	0.408656	0.156504	0.593336	0.402717	-0.0103164	0.00175261	0.00593865	5.9554	6.32885	3.05012	1.40164	6.41472	3.01488	1.3115	-0.0858746	0.0352428	0.0901399	6.4541	1.81734	1.08279	0.566725	1.85435	1.07732	0.552823	-0.0370146	0.00546777	0.0139016
5.9448	0.737449	3.59604	2.42154	0.711306	3.57708	2.37934	0.0261432	0.0189686	0.0422034	6.4663	0.329533	1.24343	0.935211	0.277252	1.25568	0.948599	0.0522811	-0.0122505	-0.0133878	6.9848	0.114018	0.595368	0.404686	0.158975	0.594287	0.404697	-0.0449572	0.00108147	-1.0848e-05	5.9561	6.32924	3.05421	1.40722	6.42238	3.02246	1.32162	-0.0931392	0.0317535	0.0856009	6.4549	1.81021	1.0855	0.568082	1.85685	1.08005	0.555912	-0.0466424	0.00544703	0.0121698
5.9455	0.756679	3.60198	2.43533	0.721623	3.58235	2.3901	0.0350566	0.0196328	0.0452285	6.467	0.354416	1.24945	0.942	0.281581	1.25796	0.953885	0.0728353	-0.00851107	-0.0118855	6.9855	0.0958979	0.592668	0.403036	0.161168	0.595121	0.406439	-0.0652702	-0.00245237	-0.00340259	5.9569	6.32554	3.06084	1.41532	6.43118	3.02911	1.33056	-0.105636	0.031729	0.0847669	6.4557	1.8109	1.08802	0.574405	1.85936	1.0828	0.559023	-0.0484612	0.00522041	0.0153819
5.9463	0.778919	3.61289	2.45137	0.733663	3.58839	2.40246	0.0452564	0.0245061	0.0489161	6.4678	0.37355	1.25337	0.947326	0.286622	1.26024	0.959204	0.0869282	-0.00687623	-0.0118778	6.9863	0.116938	0.594568	0.403826	0.163708	0.596076	0.408439	-0.0467702	-0.00150728	-0.0046134	5.9576	6.33662	3.06526	1.42657	6.43891	3.03674	1.34084	-0.102293	0.0285234	0.0857296	6.4564	1.82859	1.09086	0.579608	1.86156	1.0852	0.561762	-0.0329733	0.00566685	0.0178463
5.947	0.798679	3.62277	2.46642	0.744355	3.59368	2.41332	0.0543245	0.0290933	0.0530989	6.4685	0.377216	1.25605	0.955426	0.2911	1.26225	0.963879	0.0861156	-0.00619864	-0.00845325	6.987	0.154018	0.592708	0.403566	0.165962	0.597032	0.41045	-0.0119437	-0.00432348	-0.00688374	5.9584	6.3537	3.07198	1.44019	6.4478	3.04438	1.35121	-0.0941024	0.0276	0.0889859	6.4572	1.84866	1.09231	0.579907	1.86409	1.08795	0.564914	-0.0154301	0.00436294	0.014993
5.9478	0.806029	3.62765	2.48112	0.756745	3.59974	2.42582	0.049284	0.0279107	0.0553052	6.4693	0.359166	1.26008	0.965804	0.296295	1.26454	0.969249	0.0628707	-0.00446129	-0.00344551	6.9878	0.163178	0.591818	0.405986	0.168584	0.59787	0.412216	-0.00540638	-0.0060513	-0.00622976	5.9592	6.3657	3.08203	1.45428	6.45676	3.05108	1.36033	-0.0910602	0.0309482	0.0939527	6.4579	1.86521	1.09341	0.581033	1.86631	1.09071	0.568097	-0.00110126	0.0026958	0.0129352
5.9485	0.811949	3.63463	2.49283	0.767727	3.60582	2.43837	0.0442228	0.0288177	0.0544596	6.4701	0.335713	1.26444	0.974968	0.301585	1.26655	0.973974	0.0341274	-0.00211108	0.000993609	6.9885	0.175448	0.592858	0.412616	0.170911	0.598829	0.414243	0.00453699	-0.00597024	-0.00162721	5.9599	6.37696	3.08808	1.46756	6.46464	3.05876	1.37084	-0.087677	0.0293207	0.0967221	6.4587	1.88147	1.09545	0.583241	1.86886	1.09313	0.570902	0.0126097	0.00231373	0.0123395
5.9493	0.817609	3.63934	2.50262	0.780535	3.61114	2.4494	0.0370744	0.0282068	0.0532167	6.4708	0.337836	1.265	0.985707	0.306313	1.26885	0.979404	0.0315226	-0.00385141	0.00630319	6.9893	0.187158	0.592878	0.413756	0.173604	0.599669	0.416028	0.0135537	-0.00679111	-0.00227225	5.9607	6.39372	3.09437	1.47769	6.4737	3.06647	1.38145	-0.0799727	0.0279057	0.0962453	6.4594	1.8803	1.09487	0.587997	1.87109	1.09591	0.574128	0.009202	-0.00104332	0.0138695
5.9501	0.823029	3.64432	2.51688	0.793553	3.61723	2.46208	0.0294763	0.0270958	0.0548062	6.4716	0.354912	1.26555	0.992854	0.311794	1.27115	0.984865	0.0431177	-0.00560737	0.00798845	6.9901	0.227448	0.597308	0.415046	0.176339	0.600632	0.418077	0.0511088	-0.00332379	-0.0030309	5.9614	6.41747	3.10071	1.48591	6.48167	3.07322	1.39079	-0.0641923	0.0274899	0.0951221	6.4602	1.86794	1.10009	0.596074	1.87366	1.09834	0.576968	-0.00572455	0.00174487	0.0191056
5.9508	0.83424	3.65195	2.53103	0.805104	3.62257	2.47323	0.0291359	0.0293846	0.0577974	6.4723	0.362277	1.26814	0.997181	0.31666	1.27318	0.989666	0.0456173	-0.00503802	0.00751495	6.9908	0.279108	0.602038	0.420966	0.178777	0.601596	0.420135	0.100331	0.000442028	0.000830889	5.9622	6.44002	3.10561	1.49757	6.49084	3.08096	1.40154	-0.0508246	0.0246503	0.096031	6.461	1.87272	1.10491	0.600929	1.87624	1.10113	0.580245	-0.00352585	0.00377715	0.0206838
5.9516	0.847655	3.65754	2.54127	0.818501	3.62868	2.48603	0.0291547	0.0288634	0.0552375	6.4731	0.380804	1.26945	1.00013	0.322316	1.27549	0.995183	0.0584875	-0.00604188	0.00494897	6.9916	0.303518	0.601328	0.422516	0.181601	0.602441	0.421944	0.121917	-0.0011127	0.000572205	5.9629	6.45471	3.11342	1.51106	6.49892	3.08775	1.41102	-0.0442047	0.0256732	0.100046	6.4617	1.88703	1.10298	0.600712	1.87851	1.10393	0.583544	0.00851583	-0.000949264	0.0171679
5.9523	0.860162	3.6649	2.55463	0.830435	3.6348	2.49891	0.029727	0.0300989	0.0557261	6.4738	0.410146	1.27037	1.00828	0.327371	1.27781	1.00073	0.0827745	-0.00743973	0.00754964	6.9923	0.301968	0.599538	0.423326	0.184105	0.603408	0.424023	0.117863	-0.00387001	-0.000697136	5.9637	6.45219	3.12216	1.52425	6.50819	3.09553	1.42194	-0.0560012	0.0266311	0.102313	6.4625	1.88485	1.10173	0.599527	1.88111	1.10638	0.586451	0.00373292	-0.00464439	0.0130752
5.9531	0.871439	3.66749	2.56925	0.844293	3.64017	2.51021	0.0271465	0.0273223	0.0590384	6.4746	0.419414	1.2738	1.01311	0.333228	1.27984	1.00562	0.0861856	-0.00604224	0.00749266	6.9931	0.276108	0.602518	0.427366	0.187006	0.604256	0.42585	0.0891016	-0.00173759	0.00151575	5.9645	6.45187	3.12814	1.53426	6.51753	3.10333	1.43294	-0.0656633	0.0248156	0.101325	6.4632	1.88551	1.1005	0.596582	1.8834	1.10919	0.589797	0.00210726	-0.0086869	0.00678539
5.9538	0.887229	3.67225	2.58071	0.856589	3.64632	2.52322	0.0306404	0.0259356	0.0574877	6.4754	0.418112	1.27942	1.01833	0.339188	1.28217	1.01123	0.0789242	-0.0027492	0.00710738	6.9938	0.256188	0.603878	0.428446	0.189593	0.605226	0.427946	0.0665947	-0.00134754	0.000499487	5.9652	6.46409	3.133	1.54446	6.52578	3.11017	1.44263	-0.0616879	0.0228362	0.101836	6.464	1.88729	1.1015	0.599218	1.88603	1.11165	0.592749	0.00126076	-0.0101507	0.00646853
5.9546	0.903054	3.68005	2.59444	0.87084	3.65248	2.5363	0.0322139	0.0275779	0.0581419	6.4761	0.419887	1.27863	1.02831	0.344479	1.28421	1.01616	0.0754079	-0.0055784	0.0121568	6.9946	0.250938	0.602198	0.429886	0.192588	0.606198	0.430054	0.0583503	-0.00399947	-0.000167727	5.966	6.47324	3.1389	1.55458	6.53525	3.118	1.45378	-0.0620155	0.0209002	0.100802	6.4648	1.88244	1.10275	0.601029	1.88866	1.11448	0.596148	-0.00622725	-0.0117264	0.00488126
5.9554	0.916292	3.68632	2.61001	0.885362	3.65787	2.54779	0.03093	0.0284524	0.0622211	6.4769	0.435679	1.27983	1.03615	0.350658	1.28654	1.02183	0.0850205	-0.0067147	0.0143174	6.9954	0.253588	0.598388	0.432156	0.195629	0.60705	0.431908	0.0579594	-0.00866151	0.000247478	5.9667	6.47591	3.14401	1.56216	6.54359	3.12587	1.46504	-0.0676837	0.0181477	0.0971191	6.4655	1.88258	1.10373	0.602646	1.89098	1.11731	0.599569	-0.00840664	-0.0135756	0.00307697
5.9561	0.933404	3.69267	2.61795	0.898296	3.66405	2.56098	0.0351081	0.0286283	0.0569735	6.4776	0.45002	1.28636	1.04246	0.356151	1.28888	1.02754	0.0938691	-0.00252521	0.0149277	6.9961	0.263748	0.595938	0.432076	0.198322	0.608025	0.434037	0.0654259	-0.0120869	-0.00196147	5.9675	6.4811	3.14939	1.57129	6.55318	3.13276	1.47497	-0.0720825	0.0166326	0.0963261	6.4663	1.88262	1.10691	0.603479	1.89365	1.11979	0.602583	-0.0110286	-0.0128835	0.000896096
5.9569	0.957094	3.69449	2.62561	0.91328	3.66946	2.57259	0.0438141	0.025033	0.0530224	6.4784	0.447124	1.28519	1.04739	0.362523	1.29093	1.03255	0.0846009	-0.00574613	0.0148391	6.9969	0.276698	0.594978	0.436746	0.201459	0.609002	0.436176	0.0752387	-0.0140235	0.000569701	5.9683	6.49309	3.15673	1.58218	6.56286	3.14066	1.48638	-0.069768	0.0160749	0.0957999	6.467	1.88819	1.11093	0.608961	1.89599	1.12264	0.606058	-0.00779903	-0.011705	0.00290364
5.9576	0.97751	3.6985	2.63786	0.926565	3.67566	2.58593	0.050945	0.0228434	0.051934	6.4792	0.42745	1.29017	1.04788	0.368999	1.29328	1.03831	0.0584512	-0.00311291	0.00957382	6.9976	0.273188	0.598098	0.442256	0.204245	0.609858	0.438055	0.0689425	-0.0117593	0.00420094	5.969	6.52015	3.16215	1.59391	6.57138	3.14758	1.49643	-0.0512323	0.0145705	0.0974813	6.4678	1.9059	1.11281	0.613893	1.89867	1.12549	0.609561	0.0072217	-0.0126874	0.00433201
5.9584	0.989758	3.7067	2.64805	0.942015	3.68187	2.59933	0.0477433	0.0248322	0.0487192	6.4799	0.402761	1.2983	1.05155	0.374784	1.29534	1.04338	0.0279764	0.00295806	0.00817299	6.9984	0.256048	0.606138	0.445326	0.207472	0.610837	0.440214	0.0485761	-0.00469899	0.00511169	5.9698	6.5475	3.16992	1.60723	6.58119	3.15552	1.50802	-0.0336928	0.0144041	0.0992088	6.4685	1.9282	1.11621	0.617386	1.90104	1.128	0.612646	0.0271581	-0.0117862	0.00473946
5.9592	1.0074	3.71505	2.66666	0.957759	3.68731	2.61111	0.0496404	0.0277405	0.055552	6.4807	0.406233	1.29924	1.0605	0.381504	1.2977	1.04921	0.024729	0.00154042	0.0112921	6.9992	0.232388	0.610938	0.445676	0.210744	0.611696	0.442113	0.0216436	-0.000757933	0.00356257	5.9705	6.5528	3.1768	1.62031	6.58982	3.16348	1.51971	-0.0370221	0.0133231	0.100604	6.4693	1.92607	1.12219	0.62627	1.90375	1.13086	0.616196	0.0223161	-0.00867474	0.0100737
5.9599	1.01789	3.72318	2.68496	0.971734	3.69354	2.62464	0.0461578	0.0296431	0.0603213	6.4814	0.434112	1.29647	1.06767	0.387471	1.30006	1.05507	0.0466405	-0.00359154	0.0126032	6.9999	0.214868	0.612718	0.447466	0.213656	0.612679	0.444293	0.00121164	3.88622e-05	0.00317299	5.9713	6.55874	3.18235	1.62948	6.59978	3.17046	1.53	-0.0410438	0.0118933	0.0994823	6.4701	1.89723	1.12689	0.634617	1.90648	1.13338	0.619326	-0.00925159	-0.00649297	0.0152909
5.9607	1.01706	3.72779	2.69731	0.987937	3.69979	2.63826	0.0291247	0.0280085	0.0590539	6.4822	0.455762	1.29467	1.07427	0.3944	1.30213	1.06022	0.0613616	-0.00746095	0.0140562	7.0007	0.217498	0.610888	0.447306	0.217037	0.613664	0.446483	0.000460625	-0.00277591	0.000822783	5.972	6.57814	3.19151	1.64271	6.60856	3.17846	1.54185	-0.0304193	0.0130563	0.100868	6.4708	1.88261	1.13114	0.639524	1.90888	1.13626	0.622931	-0.0262731	-0.00511825	0.0165935
5.9614	1.03363	3.73028	2.70807	1.00233	3.70526	2.65023	0.0312951	0.0250258	0.0578456	6.4829	0.472445	1.30077	1.0795	0.400587	1.3045	1.06614	0.0718576	-0.00373173	0.0133607	7.0014	0.234148	0.607058	0.440506	0.220036	0.614527	0.448409	0.0141122	-0.00746894	-0.00790322	5.9728	6.5875	3.19946	1.65852	6.61865	3.18547	1.5523	-0.0311432	0.0139894	0.106228	6.4716	1.87947	1.13775	0.646571	1.91164	1.13915	0.626564	-0.0321703	-0.00139964	0.0200071
5.9622	1.05804	3.73575	2.71846	1.01909	3.71152	2.66397	0.0389487	0.0242324	0.054493	6.4837	0.490068	1.30068	1.08514	0.407768	1.30687	1.0721	0.0822996	-0.00619578	0.0130445	7.0022	0.247638	0.601658	0.439596	0.22351	0.615515	0.45062	0.0241282	-0.0138566	-0.0110245	5.9736	6.5857	3.2055	1.67038	6.62882	3.19351	1.56432	-0.0431199	0.0119934	0.10606	6.4723	1.86452	1.14115	0.651391	1.91406	1.14168	0.629762	-0.0495435	-0.00053072	0.0216287
5.9629	1.08334	3.74082	2.73203	1.03397	3.71701	2.67605	0.0493635	0.0238128	0.0559807	6.4845	0.512894	1.3017	1.09279	0.415075	1.30895	1.07734	0.0978189	-0.00725734	0.0154587	7.0029	0.252348	0.598848	0.440466	0.2266	0.616505	0.452843	0.0257484	-0.0176563	-0.0123775	5.9743	6.59437	3.21305	1.68022	6.6378	3.20157	1.57645	-0.0434308	0.0114841	0.103777	6.4731	1.85991	1.13845	0.650327	1.91684	1.14459	0.633446	-0.0569372	-0.00613439	0.0168808
5.9637	1.11515	3.74677	2.74734	1.05121	3.7233	2.68994	0.0639433	0.0234752	0.0573993	6.4852	0.53155	1.30971	1.09894	0.421559	1.31134	1.08335	0.109991	-0.0016309	0.0155864	7.0037	0.240708	0.596698	0.439866	0.230185	0.617372	0.454796	0.0105231	-0.0206738	-0.0149304	5.9751	6.61366	3.21849	1.69125	6.64815	3.20864	1.58712	-0.0344834	0.00985718	0.104134	6.4738	1.87633	1.13616	0.649234	1.9193	1.1475	0.637161	-0.0429698	-0.0113391	0.0120724
5.9645	1.14321	3.7546	2.76037	1.06873	3.72959	2.70389	0.0744834	0.0250111	0.0564771	6.486	0.529433	1.31313	1.10676	0.429121	1.31343	1.08865	0.100311	-0.00030005	0.0181134	7.0045	0.219318	0.599598	0.441606	0.233826	0.618365	0.45704	-0.014508	-0.0187666	-0.0154338	5.9758	6.62665	3.22516	1.70325	6.65726	3.21674	1.59942	-0.0306158	0.00842476	0.103831	6.4746	1.90123	1.13839	0.652042	1.92211	1.15005	0.640437	-0.0208844	-0.0116688	0.0116056
5.9652	1.16083	3.76041	2.77244	1.08438	3.73511	2.71616	0.0764529	0.0253034	0.0562799	6.4867	0.519279	1.31599	1.11572	0.435859	1.31582	1.09473	0.08342	0.000167131	0.020991	7.0052	0.217918	0.600168	0.440316	0.237052	0.619235	0.459014	-0.0191345	-0.019067	-0.0186977	5.9766	6.64215	3.23203	1.71511	6.66776	3.22486	1.61183	-0.0256057	0.00717092	0.103281	6.4754	1.93328	1.14252	0.654914	1.92494	1.15298	0.644205	0.00833428	-0.0104563	0.0107094
5.966	1.16767	3.763	2.78344	1.10251	3.74143	2.73025	0.0651675	0.021575	0.0531912	6.4875	0.507934	1.32406	1.1258	0.443673	1.31822	1.10085	0.0642612	0.00584126	0.0249525	7.006	0.241718	0.598978	0.438956	0.2408	0.620232	0.461279	0.000918269	-0.0212533	-0.0223231	5.9773	6.65248	3.24132	1.72739	6.67703	3.23198	1.62276	-0.0245504	0.00934052	0.10463	6.4761	1.95039	1.14421	0.656644	1.92743	1.15555	0.647523	0.0229547	-0.01134	0.00912124
5.9667	1.17708	3.76961	2.79638	1.11858	3.74776	2.74443	0.0584915	0.0218525	0.051949	6.4883	0.498926	1.33276	1.1361	0.451614	1.32032	1.10623	0.0473121	0.0124407	0.0298665	7.0067	0.261248	0.601848	0.444976	0.244137	0.621229	0.463554	0.0171107	-0.0193803	-0.0185779	5.9781	6.66189	3.24883	1.73996	6.68771	3.24014	1.63533	-0.0258174	0.00868487	0.10463	6.4769	1.9592	1.14727	0.661658	1.9303	1.15849	0.65135	0.0288987	-0.0112199	0.0103077
5.9675	1.18623	3.77763	2.80643	1.13724	3.75331	2.7569	0.0489982	0.0243239	0.0495324	6.489	0.495126	1.33541	1.14119	0.458689	1.32272	1.11241	0.0364367	0.0126852	0.0287803	7.0075	0.275608	0.603598	0.451506	0.248001	0.622103	0.465554	0.0276072	-0.0185046	-0.014048	5.9789	6.6766	3.25415	1.75211	6.69848	3.2473	1.64642	-0.0218768	0.00685501	0.105695	6.4776	1.96723	1.1515	0.667887	1.93282	1.16144	0.655207	0.0344077	-0.00993752	0.0126805
5.9683	1.20465	3.78014	2.81903	1.15627	3.75966	2.77121	0.0483829	0.0204816	0.0478199	6.4898	0.492262	1.34057	1.14722	0.466929	1.32513	1.11864	0.0253328	0.0154339	0.0285861	7.0083	0.294478	0.607128	0.456436	0.25192	0.623104	0.467854	0.0425584	-0.0159762	-0.0114176	5.9796	6.67781	3.25843	1.76104	6.70797	3.2555	1.6592	-0.0301604	0.0029211	0.101845	6.4784	1.96132	1.15509	0.671925	1.93572	1.16403	0.658602	0.0256014	-0.00893104	0.0133229
5.969	1.24365	3.78606	2.83161	1.17318	3.76523	2.78379	0.0704707	0.0208364	0.0478263	6.4905	0.491307	1.34106	1.15148	0.47425	1.32725	1.12411	0.0170566	0.0138109	0.027374	7.009	0.318238	0.608218	0.461866	0.255398	0.624107	0.470164	0.0628399	-0.0158892	-0.00829792	5.9804	6.67347	3.26612	1.77169	6.71893	3.26373	1.67207	-0.0454583	0.00239325	0.0996199	6.4792	1.93601	1.1582	0.676295	1.93863	1.16699	0.662508	-0.00262022	-0.00878263	0.0137872
5.9698	1.27776	3.79742	2.84577	1.19279	3.7716	2.79824	0.0849761	0.0258245	0.0475271	6.4913	0.503567	1.3406	1.15427	0.482748	1.32967	1.13039	0.0208192	0.0109318	0.0238785	7.0098	0.341978	0.614068	0.465426	0.259447	0.624986	0.472194	0.082531	-0.0109179	-0.00676775	5.9811	6.68222	3.27884	1.78726	6.72861	3.27094	1.68341	-0.0463891	0.00790024	0.103853	6.4799	1.91	1.16291	0.681701	1.94119	1.16959	0.665958	-0.031198	-0.006675	0.0157437
5.9705	1.29929	3.7993	2.86041	1.21016	3.77799	2.81278	0.089133	0.021318	0.0476272	6.492	0.535281	1.34446	1.15993	0.490314	1.33179	1.13592	0.0449666	0.0126719	0.0240082	7.0105	0.368308	0.623818	0.473436	0.263039	0.625992	0.474524	0.105269	-0.0021739	-0.00108826	5.9819	6.70861	3.28442	1.80094	6.73976	3.2792	1.69645	-0.0311518	0.00522161	0.10449	6.4807	1.8885	1.16541	0.68571	1.94415	1.17257	0.669928	-0.0556498	-0.0071553	0.015782
5.9713	1.32205	3.79931	2.87261	1.23044	3.78358	2.82556	0.0916167	0.0157318	0.0470493	6.4928	0.570879	1.34478	1.16817	0.499126	1.33421	1.14227	0.0717525	0.0105647	0.0258992	7.0113	0.388898	0.627018	0.478096	0.2672	0.626874	0.476575	0.121698	0.000144243	0.00152051	5.9827	6.73792	3.29103	1.81222	6.751	3.28749	1.70963	-0.013083	0.00353551	0.102592	6.4814	1.89226	1.16503	0.685362	1.94674	1.17555	0.673928	-0.0544859	-0.0105253	0.0114346
5.972	1.33533	3.80862	2.88347	1.24844	3.78999	2.84024	0.0868865	0.0186348	0.0432358	6.4936	0.590912	1.3492	1.17513	0.508083	1.33665	1.14867	0.0828292	0.0125514	0.0264602	7.012	0.392938	0.625718	0.480146	0.270891	0.627883	0.478929	0.122047	-0.00216436	0.00121737	5.9834	6.74789	3.29842	1.82337	6.76093	3.29476	1.72124	-0.0130367	0.00365305	0.102131	6.4822	1.91221	1.16551	0.689931	1.94973	1.17817	0.677448	-0.0375211	-0.0126631	0.0124828
5.9728	1.33694	3.81728	2.89592	1.2693	3.7956	2.85315	0.0676426	0.0216789	0.042774	6.4943	0.593279	1.35219	1.1771	0.516038	1.33878	1.15429	0.0772406	0.0134093	0.0228094	7.0128	0.369768	0.625798	0.481026	0.275187	0.628894	0.481294	0.0945808	-0.00309563	-0.000268221	5.9842	6.74738	3.30811	1.83969	6.7724	3.30309	1.7346	-0.0250144	0.005018	0.105092	6.4829	1.92746	1.1673	0.692529	1.95236	1.18117	0.681509	-0.0249031	-0.0138701	0.0110207
5.9736	1.34362	3.81786	2.90713	1.2905	3.80203	2.86797	0.0531261	0.0158319	0.0391598	6.4951	0.593311	1.35112	1.17844	0.525288	1.34122	1.16074	0.0680228	0.00989795	0.0176985	7.0136	0.349508	0.629758	0.487176	0.279545	0.62978	0.483372	0.0699625	-2.12193e-05	0.00380397	5.9849	6.75295	3.31386	1.85365	6.78252	3.31039	1.74636	-0.0295649	0.00346851	0.107294	6.4837	1.9393	1.16871	0.693078	1.95538	1.18418	0.685599	-0.0160875	-0.0154753	0.00747877
5.9743	1.35956	3.82247	2.92037	1.30939	3.80847	2.88288	0.0501735	0.0139999	0.0374925	6.4958	0.606415	1.34965	1.18348	0.533555	1.34367	1.16724	0.0728601	0.00598121	0.0162423	7.0143	0.336908	0.632198	0.488276	0.283411	0.630794	0.485761	0.053497	0.00140429	0.0025146	5.9857	6.76615	3.31711	1.86104	6.79419	3.31877	1.75993	-0.0280352	-0.00165462	0.10111	6.4845	1.95551	1.17026	0.69742	1.95843	1.18682	0.689205	-0.0029242	-0.016565	0.00821567
5.9751	1.38364	3.83049	2.93322	1.33132	3.81412	2.89598	0.0523233	0.016376	0.0372455	6.4966	0.635619	1.34849	1.18984	0.543139	1.34581	1.17296	0.0924799	0.00267625	0.0168844	7.0151	0.326838	0.630218	0.485036	0.287892	0.631683	0.487862	0.038946	-0.00146484	-0.00282574	5.9864	6.77893	3.32927	1.87318	6.80449	3.32716	1.7736	-0.0255647	0.00211668	0.0995846	6.4852	1.97097	1.17867	0.708445	1.96111	1.18985	0.693353	0.00985599	-0.0111808	0.0150921
5.9758	1.41981	3.83334	2.94873	1.35078	3.82058	2.91103	0.0690284	0.012763	0.037699	6.4973	0.654135	1.35011	1.19785	0.551647	1.34826	1.17952	0.102487	0.00184226	0.0183312	7.0158	0.316718	0.628798	0.490446	0.291887	0.6327	0.490271	0.0248311	-0.00390196	0.00017488	5.9872	6.79526	3.3397	1.888	6.81639	3.33452	1.78564	-0.021131	0.0051775	0.102362	6.486	1.97843	1.18601	0.714551	1.9642	1.1925	0.697011	0.0142281	-0.00648868	0.0175405
5.9766	1.45407	3.83465	2.96415	1.37335	3.82706	2.92618	0.0807165	0.00759554	0.0379748	6.4981	0.648615	1.35442	1.20302	0.561534	1.35042	1.18529	0.0870807	0.00400078	0.0177248	7.0166	0.317228	0.631968	0.492746	0.296514	0.633719	0.492693	0.0207136	-0.00175118	5.25713e-05	5.988	6.81585	3.3461	1.90165	6.82842	3.34295	1.7995	-0.012567	0.00314665	0.102152	6.4867	1.9767	1.18869	0.719488	1.96692	1.19554	0.701225	0.00977683	-0.00685155	0.0182629
5.9773	1.47593	3.84187	2.9756	1.39346	3.83273	2.93949	0.0824744	0.00914073	0.0361142	6.4989	0.642942	1.36249	1.20891	0.571642	1.35288	1.19193	0.0713003	0.009606	0.016982	7.0173	0.335988	0.634958	0.496796	0.300616	0.634613	0.494824	0.0353715	0.000345469	0.00197232	5.9887	6.8352	3.35173	1.91422	6.83903	3.35141	1.81348	-0.00383282	0.000320196	0.100742	6.4875	1.97878	1.19771	0.731314	1.97005	1.19859	0.705469	0.00872767	-0.000877261	0.0258455
5.9781	1.49615	3.85444	2.9881	1.4168	3.83923	2.95476	0.0793531	0.0152178	0.03334	6.4996	0.644075	1.36594	1.21514	0.580626	1.35535	1.19861	0.0634491	0.0105863	0.0165316	7.0181	0.357068	0.636748	0.501976	0.305369	0.635636	0.497271	0.0516994	0.0011127	0.00470519	5.9895	6.85	3.35864	1.92328	6.85127	3.35883	1.82582	-0.00127411	-0.000188589	0.0974679	6.4883	1.99183	1.20424	0.736637	1.9732	1.20126	0.709207	0.0186287	0.00298285	0.0274303
5.9789	1.5156	3.85722	3.00045	1.44052	3.84492	2.9682	0.0750875	0.0123041	0.0322523	6.5004	0.666061	1.36007	1.21962	0.59105	1.35751	1.20448	0.075011	0.00255203	0.0151401	7.0189	0.370608	0.641088	0.503556	0.310214	0.63666	0.49973	0.0603936	0.00442815	0.00382638	5.9902	6.86431	3.3672	1.93441	6.86213	3.36733	1.84	0.00217819	-0.000134706	0.0944095	6.489	1.99475	1.20919	0.74221	1.97597	1.20432	0.713512	0.0187719	0.00486171	0.0286984
5.9796	1.53176	3.8548	3.00805	1.46155	3.85144	2.98365	0.0702089	0.00336266	0.0244031	6.5011	0.687282	1.35795	1.22072	0.600306	1.35999	1.21122	0.0869756	-0.00204444	0.00950205	7.0196	0.371928	0.645428	0.505126	0.314518	0.637558	0.501889	0.0574096	0.00787044	0.00323653	5.991	6.87735	3.37481	1.95054	6.87465	3.37478	1.8525	0.002707	2.40803e-05	0.0980487	6.4898	1.98603	1.21242	0.746115	1.97917	1.2074	0.717857	0.00685227	0.00502086	0.028258
5.9804	1.53606	3.86398	3.02355	1.48602	3.85797	2.99918	0.0500304	0.00601006	0.0243764	6.5019	0.688159	1.3579	1.22489	0.611116	1.36216	1.21715	0.0770423	-0.0042665	0.00773871	7.0204	0.366028	0.644098	0.504866	0.319502	0.638585	0.504369	0.0465256	0.00551343	0.000496507	5.9917	6.88231	3.38286	1.96634	6.8857	3.38332	1.86689	-0.0033865	-0.000465631	0.0994577	6.4905	1.96028	1.21209	0.744801	1.98199	1.21009	0.721685	-0.0217161	0.00200224	0.0231158
5.9811	1.53766	3.88024	3.04012	1.50783	3.8637	3.01282	0.0298305	0.0165467	0.0273025	6.5027	0.680102	1.36003	1.22998	0.622104	1.36465	1.22398	0.0579979	-0.00462437	0.00600576	7.0211	0.358258	0.641638	0.505036	0.323917	0.639486	0.506553	0.0343406	0.00215244	-0.00151694	5.9925	6.8739	3.39002	1.97838	6.89844	3.39189	1.88141	-0.0245409	-0.00187325	0.0969744	6.4913	1.93485	1.21197	0.745718	1.98524	1.21318	0.72609	-0.0503892	-0.00120556	0.0196285
5.9819	1.55855	3.88866	3.0537	1.53308	3.87025	3.02848	0.0254658	0.0184176	0.0252225	6.5034	0.675799	1.35988	1.23461	0.631868	1.36714	1.23084	0.0439306	-0.00726664	0.00377619	7.0219	0.353868	0.638708	0.505136	0.32906	0.640517	0.509059	0.0248082	-0.00180864	-0.00392258	5.9933	6.85835	3.39572	1.99018	6.91138	3.3994	1.8942	-0.0530238	-0.0036788	0.0959811	6.492	1.92916	1.21254	0.749203	1.98809	1.21589	0.729968	-0.0589385	-0.00334418	0.0192354
5.9827	1.59496	3.88873	3.06822	1.55872	3.87681	3.04425	0.0362364	0.0119195	0.0239685	6.5042	0.674138	1.36088	1.2384	0.643206	1.36933	1.23687	0.0309319	-0.00845051	0.0015372	7.0227	0.348828	0.638688	0.508616	0.33428	0.64155	0.511576	0.0145476	-0.0028615	-0.00296021	5.994	6.85825	3.40292	2.00338	6.92281	3.40801	1.90892	-0.0645566	-0.00508857	0.0944605	6.4928	1.96192	1.21489	0.75344	1.99139	1.21899	0.73444	-0.0294741	-0.0040952	0.0190004
5.9834	1.63008	3.88918	3.08861	1.58152	3.88257	3.05812	0.0485505	0.00661445	0.0304928	6.5049	0.693839	1.36194	1.24327	0.653331	1.37183	1.24379	0.0405081	-0.00989139	-0.000521898	7.0234	0.346708	0.641718	0.513586	0.338913	0.642455	0.513789	0.00779498	-0.000736475	-0.000202775	5.9948	6.86979	3.40914	2.0151	6.936	3.41556	1.9219	-0.0662103	-0.006423	0.0932055	6.4936	2.00722	1.2175	0.758263	1.99471	1.2221	0.738948	0.0125066	-0.00459468	0.0193156
5.9842	1.65359	3.89899	3.10668	1.60807	3.88916	3.07404	0.0455165	0.00983572	0.0326438	6.5057	0.727773	1.36223	1.25088	0.66509	1.37433	1.25077	0.0626832	-0.0121069	0.000115395	7.0242	0.354478	0.644228	0.515206	0.344281	0.643491	0.516332	0.0101969	0.000736952	-0.00112629	5.9955	6.88313	3.41704	2.03021	6.94765	3.42421	1.93685	-0.0645137	-0.007164	0.0933657	6.4943	2.02867	1.21979	0.76161	1.99764	1.22483	0.742917	0.0310315	-0.0050379	0.018693
5.9849	1.66747	3.91086	3.12207	1.63163	3.89493	3.08802	0.0358366	0.0159333	0.0340488	6.5064	0.764461	1.3664	1.25933	0.675533	1.37653	1.2569	0.0889273	-0.0101337	0.00243092	7.0249	0.366928	0.642688	0.517536	0.349055	0.644529	0.518886	0.0178726	-0.00184059	-0.0013504	5.9963	6.89479	3.4253	2.04435	6.96115	3.43288	1.95192	-0.0663614	-0.00758076	0.0924358	6.4951	2.02429	1.22344	0.763672	2.00101	1.22795	0.747486	0.0232806	-0.00451589	0.0161864
5.9857	1.68442	3.91107	3.13945	1.65895	3.90154	3.10412	0.0254655	0.00953007	0.035336	6.5072	0.782951	1.37287	1.26789	0.687653	1.37905	1.26395	0.0952979	-0.00617898	0.00394535	7.0257	0.375958	0.644298	0.525226	0.354599	0.645438	0.521132	0.0213588	-0.00113988	0.00409436	5.9971	6.90495	3.42916	2.05449	6.9748	3.44049	1.96519	-0.0698509	-0.0113297	0.0893049	6.4958	2.01676	1.22697	0.766182	2.00398	1.23109	0.752096	0.0127726	-0.00412333	0.0140863
5.9864	1.71011	3.91129	3.15913	1.68323	3.90816	3.12028	0.0268774	0.00312972	0.0388527	6.508	0.773101	1.37996	1.27395	0.700032	1.38125	1.27014	0.0730692	-0.00129294	0.00381196	7.0264	0.378578	0.652978	0.533516	0.359515	0.64648	0.52371	0.0190626	0.00649858	0.00980639	5.9978	6.91983	3.4382	2.06661	6.98688	3.44921	1.98046	-0.0670524	-0.0110059	0.0861502	6.4966	2.02377	1.2266	0.772801	2.00741	1.23384	0.756161	0.0163546	-0.00723565	0.0166403
5.9872	1.7379	3.91471	3.18069	1.71148	3.91397	3.13449	0.0264211	0.000745058	0.0462	6.5087	0.747271	1.38214	1.27806	0.71106	1.38378	1.27727	0.0362108	-0.00163829	0.000794291	7.0272	0.375708	0.655618	0.534016	0.365212	0.647392	0.525979	0.0104959	0.00822592	0.00803745	5.9986	6.94252	3.44682	2.08427	7.00082	3.45795	1.99589	-0.0582995	-0.0111294	0.0883837	6.4973	2.03218	1.22605	0.775872	2.01043	1.23699	0.760834	0.0217443	-0.0109427	0.015038
5.988	1.76806	3.92356	3.19682	1.74019	3.92061	3.15081	0.0278623	0.00294971	0.0460081	6.5095	0.716592	1.38495	1.28407	0.723851	1.3863	1.28443	-0.00725925	-0.00135803	-0.0003618	7.028	0.370208	0.652458	0.531506	0.371	0.648437	0.528583	-0.000792265	0.00402093	0.00292289	5.9993	6.97414	3.45332	2.09902	7.01319	3.46562	2.00948	-0.0390487	-0.0123003	0.0895414	6.4981	2.0375	1.23064	0.781271	2.01391	1.23975	0.764951	0.0235848	-0.00910997	0.0163205
5.9887	1.79872	3.93555	3.20625	1.76566	3.92727	3.16723	0.0330521	0.00828075	0.039021	6.5102	0.715068	1.39064	1.29186	0.735202	1.38852	1.29073	-0.0201341	0.00211525	0.00112867	7.0287	0.367008	0.651988	0.533846	0.376159	0.649483	0.531198	-0.00915062	0.00250506	0.00264764	6.0001	7.00147	3.4593	2.11179	7.02749	3.4744	2.02511	-0.0260229	-0.0150981	0.0866842	6.4989	2.06042	1.23804	0.787425	2.01743	1.24292	0.769698	0.0429854	-0.00487888	0.0177273
5.9895	1.8314	3.94607	3.2128	1.79521	3.93311	3.18168	0.0361807	0.012964	0.0311265	6.511	0.744771	1.39164	1.30121	0.748443	1.39106	1.29797	-0.00367177	0.000578284	0.00324607	7.0295	0.373098	0.655858	0.539696	0.38213	0.6504	0.533497	-0.00903225	0.00545812	0.00619912	6.0008	7.02291	3.46799	2.12445	7.04013	3.4821	2.03888	-0.0172272	-0.0141075	0.0855789	6.4996	2.09916	1.23938	0.790507	2.02053	1.24609	0.774484	0.0786221	-0.00671673	0.0160232
5.9902	1.85213	3.95303	3.22448	1.82162	3.93979	3.19826	0.0305184	0.0132425	0.0262241	6.5117	0.769791	1.39372	1.30633	0.760239	1.3936	1.30525	0.00955176	0.000114441	0.00108171	7.0302	0.385078	0.655688	0.543686	0.387422	0.65145	0.53614	-0.00234389	0.00423813	0.00754595	6.0016	7.03977	3.48004	2.13735	7.05474	3.49093	2.05476	-0.0149713	-0.010891	0.0825891	6.5004	2.12983	1.23822	0.791978	2.02411	1.24888	0.7787	0.105718	-0.0106558	0.0132785
5.991	1.87384	3.95492	3.24284	1.85219	3.94565	3.21283	0.0216522	0.00927854	0.030015	6.5125	0.779691	1.39233	1.31159	0.773913	1.39583	1.31166	0.00577784	-0.00350547	-6.80685e-05	7.031	0.399528	0.655468	0.542966	0.393568	0.65237	0.538464	0.00595963	0.00309777	0.00450242	6.0024	7.05039	3.48597	2.14895	7.06956	3.49979	2.07077	-0.0191679	-0.0138152	0.0781817	6.5011	2.13806	1.23534	0.793008	2.02726	1.25207	0.783548	0.110796	-0.0167295	0.00946033
5.9917	1.90051	3.95533	3.25877	1.87931	3.95235	3.22957	0.0211909	0.00298786	0.0292065	6.5133	0.782761	1.39643	1.32192	0.787827	1.39839	1.31902	-0.00506616	-0.00195849	0.0029012	7.0317	0.409008	0.659878	0.544716	0.399043	0.653424	0.541131	0.00996506	0.00645447	0.00358546	6.0031	7.05464	3.4919	2.16457	7.08271	3.50755	2.08487	-0.0280709	-0.0156507	0.0797033	6.5019	2.112	1.23679	0.793433	2.0309	1.25487	0.787825	0.0810928	-0.018078	0.00560838
5.9925	1.92512	3.95679	3.27107	1.91077	3.95906	3.24641	0.0143549	-0.00227022	0.0246596	6.514	0.781431	1.40142	1.33153	0.800218	1.40062	1.32549	-0.0187869	0.00079453	0.00604224	7.0325	0.408218	0.660388	0.541626	0.405377	0.654479	0.54381	0.00284135	0.00590944	-0.00218415	6.0039	7.06212	3.50205	2.18094	7.09789	3.51644	2.1011	-0.035779	-0.0143969	0.0798473	6.5027	2.06021	1.23931	0.79995	2.03458	1.25807	0.792754	0.0256286	-0.018765	0.00719631
5.9933	1.949	3.96748	3.28214	1.9429	3.96495	3.26122	0.00609708	0.00253272	0.0209227	6.5148	0.779621	1.40491	1.33942	0.814649	1.40318	1.33293	-0.035028	0.00172341	0.0064944	7.0333	0.408508	0.657208	0.537436	0.411809	0.655404	0.546167	-0.00330114	0.00180459	-0.00873077	6.0046	7.08105	3.51286	2.19547	7.11132	3.52536	2.11745	-0.0302744	-0.0125008	0.0780201	6.5034	2.01474	1.24082	0.805327	2.03782	1.26129	0.797719	-0.0230842	-0.0204698	0.0076077
5.994	1.98002	3.98315	3.3	1.97144	3.97169	3.27822	0.00858319	0.0114634	0.021781	6.5155	0.780431	1.41021	1.34338	0.827471	1.40575	1.34042	-0.0470407	0.00445545	0.00296772	7.034	0.410428	0.653678	0.539266	0.417516	0.656462	0.548872	-0.00708783	-0.00278354	-0.00960648	6.0054	7.11712	3.52034	2.20621	7.12689	3.53319	2.13189	-0.00977373	-0.012846	0.0743189	6.5042	1.9957	1.24198	0.808191	2.04156	1.26411	0.802091	-0.0458617	-0.0221254	0.00609994
5.9948	2.01994	3.99272	3.31347	2.00452	3.9776	3.29317	0.0154226	0.0151274	0.0203023	6.5163	0.798091	1.41241	1.34943	0.842355	1.408	1.347	-0.0442647	0.00440514	0.00243545	7.0348	0.422378	0.652448	0.542956	0.424159	0.657522	0.551593	-0.00178075	-0.00507402	-0.00863659	6.0062	7.15606	3.52329	2.21865	7.14268	3.54215	2.14851	0.0133753	-0.0188591	0.0701485	6.5049	2.01276	1.2411	0.809776	2.04487	1.26734	0.807126	-0.0321097	-0.0262365	0.0026502
5.9955	2.06509	3.99921	3.32708	2.03384	3.98436	3.31035	0.0312552	0.0148571	0.0167356	6.5171	0.819131	1.41565	1.35644	0.857497	1.41058	1.35456	-0.038366	0.00506866	0.00188458	7.0355	0.430768	0.650808	0.548916	0.430052	0.658451	0.553982	0.000715852	-0.00764298	-0.00506604	6.0069	7.18269	3.53062	2.23093	7.15667	3.55001	2.16313	0.0260162	-0.0193918	0.0678034	6.5057	2.04895	1.24002	0.812415	2.04868	1.27058	0.812205	0.000265598	-0.0305562	0.000209928
5.9963	2.10473	4.00219	3.34465	2.06806	3.99113	3.32762	0.0366688	0.0110612	0.0170321	6.5178	0.842611	1.41764	1.36201	0.871038	1.41316	1.36216	-0.028427	0.00447714	-0.000149012	7.0363	0.429388	0.659868	0.554586	0.436879	0.659515	0.556727	-0.00749111	0.000353098	-0.00214148	6.0077	7.19863	3.53943	2.24699	7.17285	3.55902	2.17999	0.0257773	-0.0195923	0.0670052	6.5064	2.1116	1.24533	0.817928	2.05205	1.27342	0.816683	0.0595498	-0.0280888	0.0012455
5.9971	2.14132	3.99913	3.36169	2.10281	3.99707	3.3428	0.0385113	0.00206423	0.0188937	6.5186	0.893181	1.42193	1.37099	0.886738	1.41542	1.36886	0.00644314	0.00650358	0.00213337	7.0371	0.435528	0.670248	0.559956	0.443804	0.660448	0.559143	-0.00827587	0.00980067	0.000813127	6.0084	7.20213	3.54789	2.2622	7.18719	3.56806	2.19698	0.0149388	-0.0201697	0.0652204	6.5072	2.16557	1.2549	0.828661	2.05593	1.27668	0.821834	0.109648	-0.0217745	0.00682694
5.9978	2.16742	3.99716	3.37948	2.13366	4.00387	3.36023	0.0337601	-0.0067029	0.0192511	6.5193	0.959981	1.4295	1.37878	0.900676	1.41801	1.37655	0.0593046	0.0114837	0.00223756	7.0378	0.454908	0.673448	0.563386	0.449982	0.661515	0.561915	0.00492597	0.0119333	0.0014708	6.0092	7.20269	3.55626	2.27335	7.20383	3.57598	2.21196	-0.00114346	-0.0197153	0.0613914	6.508	2.16284	1.26034	0.835627	2.05986	1.27953	0.82637	0.102981	-0.0191909	0.00925672
5.9986	2.19503	3.99981	3.39629	2.16944	4.01068	3.37778	0.0255909	-0.0108657	0.0185122	6.5201	1.00154	1.43528	1.38956	0.916883	1.42028	1.3833	0.084658	0.0149928	0.00625813	7.0386	0.477488	0.666938	0.564976	0.457138	0.662584	0.564699	0.0203496	0.00435472	0.000277162	6.0099	7.2045	3.56339	2.28612	7.21857	3.58506	2.2292	-0.0140753	-0.0216651	0.0569239	6.5087	2.12876	1.2651	0.837387	2.06333	1.28281	0.831605	0.0654271	-0.0177133	0.00578254
5.9993	2.22319	4.00531	3.41233	2.20133	4.01665	3.39321	0.0218632	-0.0113363	0.0191259	6.5208	1.01067	1.43953	1.39778	0.931369	1.42288	1.39107	0.0793024	0.0166426	0.00670946	7.0393	0.487038	0.664438	0.566206	0.463482	0.66352	0.567147	0.0235554	0.000917912	-0.000940561	6.0107	7.21821	3.57312	2.30205	7.23563	3.59302	2.24439	-0.0174212	-0.0199034	0.057662	6.5095	2.07777	1.27177	0.843878	2.06733	1.28609	0.836878	0.0104315	-0.0143245	0.00700057
6.0001	2.24611	4.00806	3.42687	2.23836	4.02348	3.41091	0.00775266	-0.0154171	0.0159652	6.5216	1.00959	1.43765	1.39964	0.948154	1.42549	1.3989	0.0614373	0.012156	0.000747323	7.0401	0.489348	0.671898	0.569596	0.470837	0.664593	0.569961	0.0185114	0.00730515	-0.000364661	6.0115	7.2504	3.58188	2.31802	7.25291	3.60215	2.26191	-0.00250769	-0.0202689	0.0561161	6.5102	2.02308	1.27722	0.849725	2.07087	1.28897	0.841521	-0.0477929	-0.0117537	0.00820386
6.0008	2.29022	4.01615	3.43816	2.27121	4.02947	3.42647	0.0190084	-0.0133147	0.0116963	6.5224	1.01144	1.43408	1.40395	0.965234	1.42778	1.40577	0.0462067	0.00630176	-0.00182056	7.0408	0.480788	0.675248	0.570066	0.477394	0.665668	0.572788	0.00339413	0.00958014	-0.00272226	6.0122	7.28472	3.58917	2.3325	7.26831	3.6113	2.27955	0.0164099	-0.0221338	0.052949	6.511	1.99938	1.28033	0.856572	2.07496	1.29227	0.846863	-0.0755835	-0.0119395	0.0097096
6.0016	2.34576	4.03039	3.44871	2.3093	4.03633	3.44437	0.0364602	-0.00593424	0.00434208	6.5231	1.02085	1.42855	1.40832	0.980402	1.43039	1.41367	0.0404491	-0.00184345	-0.00535011	7.0416	0.473448	0.671398	0.567846	0.484989	0.666609	0.575272	-0.0115415	0.00478888	-0.00742638	6.013	7.3151	3.59643	2.34637	7.28612	3.61932	2.29509	0.0289798	-0.0228932	0.05128	6.5117	2.00681	1.28246	0.861053	2.07858	1.29557	0.852256	-0.0717721	-0.0131164	0.00879741
6.0024	2.39548	4.04046	3.46358	2.34812	4.0432	3.46236	0.0473592	-0.00273609	0.00121832	6.5239	1.02468	1.43013	1.41125	0.998117	1.43268	1.42062	0.0265635	-0.00255501	-0.00936389	7.0424	0.478828	0.666618	0.565586	0.492694	0.667686	0.578123	-0.0138663	-0.00106812	-0.0125369	6.0137	7.32571	3.60746	2.3618	7.30189	3.62851	2.31297	0.0238175	-0.0210538	0.0488329	6.5125	2.02422	1.28386	0.862807	2.08275	1.29847	0.857011	-0.0585337	-0.014618	0.00579572
6.0031	2.43643	4.05039	3.48065	2.38269	4.04922	3.47818	0.0537357	0.00117302	0.00247478	6.5246	1.03377	1.43514	1.4144	1.01387	1.43531	1.4286	0.0199056	-0.000169277	-0.0142012	7.0431	0.492988	0.659478	0.565396	0.499524	0.668631	0.580633	-0.00653577	-0.00915313	-0.0152375	6.0145	7.32659	3.61983	2.37805	7.32016	3.63773	2.33104	0.00642633	-0.0179038	0.0470181	6.5133	2.04836	1.28578	0.86669	2.08697	1.3018	0.862482	-0.0386126	-0.0160161	0.00420785
6.0039	2.46751	4.05854	3.49845	2.42275	4.05611	3.49634	0.0447612	0.00242901	0.00211453	6.5254	1.06876	1.43607	1.41817	1.03214	1.43794	1.43664	0.0366228	-0.00186992	-0.0184662	7.0439	0.513008	0.655678	0.566886	0.507479	0.669713	0.583515	0.00552893	-0.0140347	-0.0166292	6.0152	7.33442	3.62686	2.39258	7.33645	3.64582	2.34695	-0.0020318	-0.0189667	0.0456309	6.514	2.07861	1.28816	0.879086	2.0907	1.30471	0.867299	-0.0120952	-0.0165551	0.0117875
6.0046	2.48889	4.0683	3.5197	2.45828	4.06302	3.51459	0.0306127	0.00528622	0.00510931	6.5262	1.09935	1.43563	1.42352	1.05071	1.44024	1.4437	0.0486407	-0.00461495	-0.0201795	7.0446	0.520578	0.657728	0.569726	0.514545	0.670796	0.586411	0.00603271	-0.0130682	-0.0166845	6.016	7.34676	3.63157	2.40739	7.35528	3.65509	2.36526	-0.00852251	-0.0235226	0.042129	6.5148	2.0983	1.29606	0.887303	2.09502	1.30805	0.87285	0.00327563	-0.0119933	0.0144535
6.0054	2.51279	4.0768	3.53672	2.49962	4.06907	3.53066	0.0131783	0.00773048	0.00605726	6.5269	1.11984	1.43465	1.42918	1.06731	1.44288	1.45182	0.0525353	-0.00823402	-0.0226339	7.0454	0.508878	0.666498	0.577766	0.522728	0.671746	0.588954	-0.0138503	-0.00524735	-0.0111878	6.0168	7.3705	3.63912	2.42279	7.3744	3.66321	2.38138	-0.00389814	-0.0240955	0.041409	6.5155	2.10709	1.3029	0.891302	2.09884	1.3114	0.87845	0.00824904	-0.00850666	0.0128524
6.0062	2.54573	4.08302	3.55271	2.5417	4.076	3.54911	0.00403142	0.00701952	0.00359654	6.5277	1.12434	1.4354	1.43459	1.08658	1.44552	1.45998	0.0377598	-0.0101277	-0.0253869	7.0462	0.497798	0.671218	0.582206	0.531029	0.672833	0.591878	-0.0332309	-0.00161457	-0.00967228	6.0175	7.39083	3.64544	2.44181	7.39132	3.67253	2.39999	-0.000495434	-0.0270922	0.0418205	6.5163	2.1168	1.30624	0.895724	2.10324	1.31434	0.883382	0.0135522	-0.00809872	0.0123417
6.0069	2.57756	4.08698	3.56709	2.57908	4.08208	3.56533	-0.00152087	0.00490761	0.00176573	6.5284	1.1305	1.43254	1.44076	1.1037	1.44784	1.46717	0.0267992	-0.0153066	-0.0264041	7.0469	0.506818	0.669918	0.579696	0.538416	0.673921	0.594816	-0.0315983	-0.00400257	-0.0151199	6.0183	7.42087	3.65297	2.45861	7.41105	3.68186	2.41873	0.00981712	-0.0288897	0.0398836	6.5171	2.12339	1.31005	0.90089	2.1077	1.31771	0.889059	0.0156853	-0.00766098	0.0118313
6.0077	2.60611	4.09292	3.58091	2.62243	4.08903	3.58396	-0.0163136	0.00389194	-0.00305033	6.5292	1.13241	1.4351	1.45155	1.12358	1.4505	1.47542	0.0088284	-0.0154012	-0.0238678	7.0477	0.516138	0.667178	0.584796	0.546994	0.674875	0.597399	-0.0308564	-0.00769687	-0.0126026	6.019	7.46768	3.66328	2.47605	7.42856	3.69005	2.43524	0.0391221	-0.026768	0.040812	6.5178	2.10598	1.31561	0.906271	2.11166	1.32108	0.89478	-0.00568271	-0.00546896	0.0114915
6.0084	2.65126	4.10021	3.6006	2.66095	4.096	3.6027	-0.0096879	0.00421762	-0.00209498	6.5299	1.11306	1.44515	1.46519	1.14134	1.45282	1.48267	-0.0282764	-0.00767732	-0.0174817	7.0484	0.529728	0.672218	0.593126	0.554602	0.675967	0.600363	-0.024874	-0.00374889	-0.00723755	6.0198	7.5098	3.67122	2.49277	7.44883	3.69943	2.45425	0.0609679	-0.028218	0.0385275	6.5186	2.08217	1.3185	0.912347	2.11623	1.32404	0.899832	-0.0340612	-0.00554597	0.0125155
6.0092	2.6972	4.10695	3.61699	2.7058	4.1021	3.61917	-0.00860023	0.00485086	-0.00218105	6.5307	1.09092	1.45217	1.47829	1.16196	1.45549	1.49102	-0.0710385	-0.00332201	-0.012727	7.0492	0.539578	0.678768	0.595786	0.563418	0.676924	0.602971	-0.02384	0.00184369	-0.0071851	6.0206	7.53701	3.67815	2.50511	7.4694	3.70884	2.47341	0.0676112	-0.0306971	0.0316992	6.5193	2.06947	1.32344	0.916846	2.12027	1.32743	0.905639	-0.0507987	-0.00399494	0.0112073
6.0099	2.7322	4.11424	3.63336	2.74561	4.10909	3.63809	-0.0134118	0.00514984	-0.00472975	6.5315	1.07974	1.4607	1.48494	1.18292	1.45816	1.49942	-0.103179	0.00253785	-0.0144724	7.0499	0.538948	0.679108	0.597846	0.571259	0.67802	0.605967	-0.032311	0.00108767	-0.00812089	6.0213	7.55875	3.6865	2.51844	7.48772	3.7171	2.49033	0.0710273	-0.0305972	0.0281153	6.5201	2.06328	1.32582	0.924992	2.12494	1.33041	0.910755	-0.0616589	-0.00458765	0.014237
6.0107	2.76947	4.12161	3.6519	2.79178	4.11522	3.65473	-0.0223081	0.00639296	-0.00282359	6.5322	1.07383	1.46276	1.49225	1.20153	1.4605	1.5068	-0.127702	0.00225806	-0.0145435	7.0507	0.540848	0.681258	0.606296	0.580364	0.679118	0.608975	-0.0395164	0.00214052	-0.00267899	6.0221	7.57982	3.6949	2.53298	7.50899	3.72655	2.50977	0.0708289	-0.0316484	0.023211	6.5208	2.06267	1.33032	0.930989	2.12908	1.33382	0.916647	-0.0664163	-0.00350261	0.0143418
6.0115	2.81466	4.12772	3.67145	2.83865	4.12224	3.67385	-0.0239844	0.00548553	-0.00239944	6.533	1.07644	1.46615	1.50296	1.22325	1.46318	1.51527	-0.146805	0.00297046	-0.0123072	7.0515	0.553778	0.687248	0.620636	0.589601	0.680079	0.611619	-0.0358231	0.00716877	0.00901699	6.0228	7.59612	3.7026	2.54868	7.52786	3.73485	2.5269	0.0682597	-0.0322442	0.0217819	6.5216	2.0787	1.33129	0.931834	2.13387	1.33724	0.922596	-0.0551736	-0.00594783	0.00923884
6.0122	2.86888	4.13111	3.69165	2.88055	4.12927	3.69307	-0.0116699	0.00184631	-0.00142097	6.5337	1.09027	1.46868	1.51112	1.24259	1.46586	1.5238	-0.152321	0.0028162	-0.0126737	7.0522	0.562658	0.687048	0.623346	0.597792	0.681181	0.614657	-0.0351336	0.00586748	0.00868917	6.0236	7.60301	3.71213	2.56847	7.54974	3.74435	2.54665	0.0532737	-0.0322223	0.0218248	6.5224	2.12184	1.32431	0.928657	2.13872	1.34024	0.927836	-0.016881	-0.0159229	0.000821471
6.013	2.93107	4.13229	3.71044	2.92908	4.13543	3.70996	0.00198936	-0.00313187	0.000478983	6.5345	1.11828	1.4653	1.51808	1.26503	1.46821	1.53131	-0.14675	-0.00291777	-0.0132245	7.053	0.578178	0.685658	0.617596	0.607305	0.682146	0.61733	-0.0291271	0.00351214	0.000266194	6.0243	7.60861	3.72194	2.58762	7.56923	3.75388	2.56657	0.0393829	-0.0319438	0.0210571	6.5231	2.15707	1.31986	0.931647	2.143	1.34367	0.933865	0.0140615	-0.0238127	-0.00221777
6.0137	2.98125	4.13934	3.72522	2.97213	4.14247	3.72935	0.00911856	-0.00312996	-0.00412846	6.5352	1.17396	1.46545	1.52428	1.28494	1.47091	1.53993	-0.110984	-0.00546253	-0.0156488	7.0537	0.608978	0.684148	0.620226	0.61578	0.683251	0.620397	-0.00680184	0.000897408	-0.000171304	6.0251	7.62676	3.72819	2.60399	7.59186	3.76224	2.58411	0.0348997	-0.0340567	0.0198812	6.5239	2.16534	1.3233	0.936082	2.14798	1.34669	0.939174	0.0173547	-0.023389	-0.00309223
6.0145	3.03433	4.14618	3.74426	3.02208	4.14954	3.74888	0.0122457	-0.00335789	-0.00461793	6.536	1.25249	1.46667	1.53387	1.30816	1.47327	1.54751	-0.055671	-0.00660372	-0.0136391	7.0545	0.625568	0.687318	0.628746	0.62559	0.684358	0.62348	-2.21729e-05	0.00296044	0.00526619	6.0259	7.6484	3.73388	2.6213	7.61484	3.77182	2.6043	0.0335569	-0.0379364	0.0170002	6.5246	2.18626	1.3267	0.938546	2.15239	1.35014	0.945297	0.0338697	-0.0234418	-0.00675118
6.0152	3.07949	4.1496	3.76024	3.06671	4.15574	3.76605	0.0127752	-0.00613165	-0.00580502	6.5368	1.32772	1.47326	1.54207	1.33183	1.47597	1.55622	-0.00411296	-0.00271606	-0.0141461	7.0552	0.635818	0.691788	0.635116	0.634284	0.685328	0.626188	0.00153351	0.00646067	0.0089277	6.0266	7.68377	3.74367	2.64029	7.63523	3.78142	2.62463	0.0485339	-0.0377433	0.0156598	6.5254	2.218	1.32925	0.940098	2.15749	1.3536	0.95147	0.060518	-0.0243493	-0.0113714
6.016	3.11527	4.15073	3.77729	3.11838	4.16282	3.78576	-0.00310683	-0.0120912	-0.00846481	6.5375	1.38047	1.47764	1.55146	1.35287	1.47868	1.56499	0.0276024	-0.00104654	-0.0135282	7.056	0.647348	0.697128	0.641556	0.644383	0.686438	0.629301	0.00296497	0.0106907	0.0122554	6.0274	7.72442	3.7549	2.65809	7.65897	3.78984	2.64261	0.0654445	-0.0349462	0.0154872	6.5262	2.23351	1.33166	0.944537	2.16264	1.35664	0.956905	0.0708625	-0.024979	-0.0123679
6.0168	3.15581	4.15303	3.7973	3.17089	4.16904	3.80307	-0.0150819	-0.0160027	-0.00577021	6.5383	1.40449	1.48368	1.56072	1.37729	1.48106	1.5727	0.0272052	0.00261831	-0.0119818	7.0568	0.660018	0.705768	0.648716	0.654662	0.68755	0.63243	0.00535583	0.0182183	0.0162863	6.0281	7.76	3.76166	2.67286	7.68013	3.7995	2.66328	0.0798659	-0.0378358	0.0095849	6.5269	2.23416	1.33317	0.948069	2.16723	1.36012	0.963161	0.0669298	-0.0269504	-0.0150923
6.0175	3.18767	4.15534	3.8163	3.21744	4.17615	3.823	-0.0297709	-0.0208092	-0.00669527	6.539	1.40245	1.48786	1.5691	1.39903	1.48378	1.58156	0.00342011	0.00407875	-0.0124611	7.0575	0.660808	0.710158	0.658116	0.663787	0.688525	0.635179	-0.00297856	0.0216336	0.0229372	6.0289	7.79491	3.76816	2.68525	7.70466	3.80796	2.68148	0.09025	-0.0397956	0.00377131	6.5277	2.22299	1.3336	0.952687	2.17254	1.36361	0.969471	0.0504518	-0.0300022	-0.0167837
6.0183	3.21862	4.15715	3.83274	3.27178	4.18328	3.84301	-0.0531609	-0.0261245	-0.0102689	6.5398	1.38371	1.49239	1.57769	1.42436	1.48616	1.58935	-0.0406477	0.00622547	-0.0116588	7.0583	0.651598	0.712948	0.665676	0.674357	0.689641	0.638335	-0.0227592	0.0233078	0.0273408	6.0297	7.81588	3.77723	2.70065	7.72958	3.81766	2.70244	0.0863028	-0.0404298	-0.00178337	6.5284	2.22125	1.33207	0.953989	2.17724	1.36667	0.975038	0.0440145	-0.0345927	-0.0210491
6.019	3.27107	4.16524	3.84663	3.32004	4.18952	3.86061	-0.0489728	-0.024281	-0.0139782	6.5406	1.37525	1.49539	1.58486	1.4501	1.48889	1.59831	-0.0748529	0.00649512	-0.0134519	7.059	0.645018	0.715468	0.662746	0.683735	0.690619	0.641113	-0.0387175	0.0248494	0.0216326	6.0304	7.81927	3.78155	2.7173	7.75175	3.82739	2.7236	0.0675197	-0.0458362	-0.00629711	6.5292	2.23971	1.33543	0.960074	2.18267	1.37017	0.981443	0.0570376	-0.0347408	-0.0213689
6.0198	3.33908	4.17528	3.86352	3.37598	4.19668	3.88082	-0.0369029	-0.0213923	-0.0172989	6.5413	1.37673	1.49654	1.59325	1.47298	1.49163	1.60732	-0.0962443	0.00491154	-0.0140681	7.0598	0.650768	0.714818	0.660546	0.694653	0.691738	0.644303	-0.0438855	0.0230799	0.0162433	6.0312	7.82604	3.78584	2.73418	7.77759	3.83592	2.74225	0.048449	-0.0500817	-0.00806379	6.5299	2.26004	1.34254	0.967012	2.18751	1.37325	0.987081	0.072535	-0.0307137	-0.0200693
6.0206	3.41567	4.18469	3.87807	3.43278	4.20384	3.90115	-0.0171072	-0.0191479	-0.0230787	6.5421	1.39035	1.5047	1.60037	1.49957	1.49402	1.61524	-0.109219	0.0106746	-0.0148702	7.0606	0.668608	0.713678	0.655746	0.705729	0.692859	0.647505	-0.0371211	0.0208192	0.00824106	6.0319	7.85247	3.79107	2.75216	7.80055	3.84569	2.76369	0.0519161	-0.054625	-0.0115252	6.5307	2.26653	1.34765	0.978443	2.19311	1.37677	0.993584	0.0734253	-0.0291201	-0.015141
6.0213	3.49938	4.199	3.89385	3.48342	4.21012	3.91904	0.0159624	-0.0111194	-0.0251865	6.5428	1.41741	1.50387	1.61191	1.52334	1.49677	1.62434	-0.105931	0.00709999	-0.0124311	7.0613	0.685678	0.712138	0.661256	0.715554	0.693842	0.650319	-0.029876	0.0182962	0.0109365	6.0327	7.89189	3.79791	2.77088	7.8272	3.85426	2.78257	0.0646844	-0.0563474	-0.0116901	6.5315	2.2567	1.35575	0.986014	2.19878	1.38031	1.00014	0.0579238	-0.0245644	-0.0141267
6.0221	3.57815	4.21236	3.91503	3.54222	4.21731	3.93956	0.0359244	-0.00494576	-0.024529	6.5436	1.45102	1.50087	1.62351	1.55091	1.49952	1.63351	-0.099885	0.00134933	-0.00999212	7.0621	0.694828	0.712228	0.667126	0.726943	0.694967	0.653556	-0.0321155	0.017261	0.0135698	6.0334	7.94246	3.80426	2.79011	7.85091	3.86409	2.80438	0.0915427	-0.0598245	-0.0142627	6.5322	2.24173	1.36303	0.991357	2.2038	1.38341	1.00592	0.0379307	-0.0203764	-0.0145589
6.0228	3.64974	4.22088	3.9361	3.59441	4.22361	3.9576	0.0553246	-0.0027256	-0.0215011	6.5443	1.48301	1.50224	1.63256	1.57538	1.50193	1.64157	-0.0923674	0.000307918	-0.00900328	7.0628	0.719118	0.717198	0.665146	0.737099	0.696095	0.656809	-0.0179813	0.0211036	0.0083369	6.0342	7.98951	3.81253	2.80817	7.87856	3.87394	2.82634	0.110944	-0.0614078	-0.0181684	6.533	2.21726	1.36667	0.997812	2.20964	1.38696	1.01256	0.00761938	-0.0202919	-0.0147463
6.0236	3.70001	4.22312	3.95716	3.65495	4.23082	3.97834	0.0450585	-0.00770092	-0.021183	6.5451	1.49478	1.50219	1.63752	1.60384	1.50469	1.65082	-0.109055	-0.00250256	-0.0133009	7.0636	0.750418	0.719748	0.666986	0.748864	0.697082	0.659667	0.00155401	0.022666	0.00731862	6.035	8.01258	3.82432	2.82622	7.90668	3.88258	2.84569	0.105901	-0.0582602	-0.019464	6.5337	2.18763	1.36839	1.00506	2.21482	1.39052	1.01926	-0.0271974	-0.0221318	-0.0141928
6.0243	3.72862	4.22275	3.97903	3.70889	4.23805	3.99921	0.0197248	-0.0153012	-0.0201778	6.5459	1.51318	1.5032	1.63538	1.6329	1.50711	1.65896	-0.119716	-0.00391138	-0.0235769	7.0643	0.770158	0.721218	0.671866	0.759294	0.698212	0.662947	0.0108643	0.023006	0.008919	6.0357	8.02089	3.83512	2.84348	7.93166	3.89248	2.86794	0.0892258	-0.0573535	-0.0244575	6.5345	2.16648	1.3658	1.00812	2.22083	1.39365	1.02517	-0.0543447	-0.0278423	-0.0170503
6.0251	3.76644	4.21909	3.99795	3.77154	4.24439	4.01755	-0.00510168	-0.0252967	-0.0195963	6.5466	1.55357	1.49962	1.64207	1.65875	1.50988	1.66831	-0.105177	-0.0102608	-0.0262419	7.0651	0.781878	0.718388	0.673686	0.771385	0.699203	0.665833	0.0104933	0.0191851	0.00785303	6.0365	8.02805	3.84498	2.85812	7.96069	3.9024	2.8904	0.0673528	-0.0574222	-0.0322781	6.5352	2.16185	1.36694	1.01499	2.22614	1.39723	1.03198	-0.0642922	-0.0302873	-0.0169903
6.0259	3.82713	4.22046	4.01301	3.83515	4.25164	4.03861	-0.00801945	-0.031179	-0.0255933	6.5474	1.59508	1.49856	1.65202	1.68875	1.51265	1.67773	-0.0936644	-0.0140975	-0.0257086	7.0659	0.784068	0.711768	0.673216	0.783701	0.700338	0.669148	0.000367165	0.0114303	0.00406754	6.0372	8.03278	3.85637	2.87313	7.98669	3.91111	2.91022	0.0460849	-0.0547476	-0.0370846	6.536	2.16336	1.37211	1.02215	2.23231	1.40036	1.03797	-0.0689576	-0.0282501	-0.0158204
6.0266	3.88933	4.23155	4.02725	3.89159	4.2589	4.05976	-0.00225735	-0.0273504	-0.0325046	6.5481	1.63313	1.49721	1.66224	1.71538	1.51509	1.68601	-0.0822537	-0.0178808	-0.0237677	7.0666	0.784048	0.708998	0.674016	0.794648	0.701475	0.67248	-0.0105996	0.00752354	0.00153625	6.038	8.04002	3.86399	2.88835	8.01685	3.92109	2.93302	0.0231657	-0.0571017	-0.0446615	6.5368	2.1769	1.37635	1.03167	2.2386	1.40396	1.04486	-0.0616953	-0.0276111	-0.0131904
6.0274	3.94752	4.25122	4.04736	3.95727	4.26527	4.07839	-0.00975418	-0.014051	-0.0310335	6.5489	1.69537	1.5029	1.67204	1.7465	1.51787	1.69552	-0.0511301	-0.0149769	-0.0234779	7.0674	0.794448	0.706458	0.676496	0.807325	0.70247	0.675406	-0.0128767	0.00398803	0.00108969	6.0387	8.06088	3.86608	2.90209	8.04365	3.92984	2.95309	0.0172281	-0.0637572	-0.0509939	6.5375	2.20876	1.38336	1.04268	2.24416	1.40757	1.05183	-0.0354009	-0.0242051	-0.00915205
6.0281	4.00215	4.27006	4.065	4.01579	4.27257	4.09979	-0.0136395	-0.00250387	-0.0347891	6.5497	1.77448	1.50844	1.68023	1.77813	1.52066	1.70508	-0.00365019	-0.0122266	-0.0248467	7.0681	0.806838	0.705798	0.673766	0.818555	0.70361	0.678768	-0.0117176	0.00218773	-0.00500238	6.0395	8.0919	3.87081	2.91865	8.0748	3.93987	2.97623	0.0170956	-0.0690556	-0.0575724	6.5383	2.23737	1.39131	1.04918	2.25062	1.41073	1.05797	-0.0132461	-0.0194265	-0.00878572
6.0289	4.05116	4.27639	4.08169	4.08359	4.27896	4.11859	-0.0324311	-0.00256348	-0.0368996	6.5504	1.81722	1.5117	1.68979	1.80624	1.52311	1.7135	0.0109782	-0.0114145	-0.0237117	7.0689	0.810618	0.701648	0.671526	0.831638	0.704752	0.682148	-0.0210204	-0.00310373	-0.0106225	6.0403	8.12732	3.87587	2.93717	8.10669	3.94992	2.99955	0.0206318	-0.0740528	-0.0623794	6.539	2.25561	1.39746	1.05899	2.25635	1.41436	1.06503	-0.000738144	-0.0168992	-0.00603282
6.0297	4.10665	4.27532	4.10047	4.15243	4.28627	4.14018	-0.0457811	-0.0109491	-0.0397129	6.5512	1.84712	1.52171	1.70067	1.83889	1.52591	1.72318	0.00823236	-0.0042069	-0.0225056	7.0697	0.813138	0.696398	0.672406	0.844922	0.705753	0.68512	-0.0317843	-0.00935483	-0.0127144	6.041	8.17641	3.88234	2.95782	8.13508	3.95874	3.02011	0.0413284	-0.0764005	-0.0622907	6.5398	2.25243	1.39995	1.06723	2.26302	1.41754	1.07125	-0.0105815	-0.0175923	-0.00401473
6.0304	4.17472	4.27267	4.11526	4.21365	4.29361	4.16192	-0.0389304	-0.0209317	-0.0466619	6.5519	1.89175	1.52151	1.70874	1.86805	1.52837	1.73168	0.0237052	-0.00686228	-0.0229387	7.0704	0.811828	0.697018	0.676526	0.856718	0.706899	0.688532	-0.0448902	-0.00988078	-0.0120059	6.0418	8.2227	3.89	2.97569	8.16806	3.96884	3.04378	0.0546427	-0.0788407	-0.0680809	6.5406	2.24511	1.40085	1.06479	2.26978	1.42118	1.07842	-0.0246642	-0.0203359	-0.0136282
6.0312	4.2416	4.27742	4.13221	4.28493	4.30003	4.18103	-0.0433321	-0.0226078	-0.048821	6.5527	1.93585	1.52648	1.71704	1.90191	1.53118	1.74145	0.0339379	-0.00470448	-0.0244119	7.0712	0.813628	0.699268	0.682086	0.870371	0.707903	0.69153	-0.0567431	-0.00863457	-0.009444	6.0425	8.26006	3.89865	2.99469	8.19734	3.97897	3.06761	0.0627155	-0.0803206	-0.0729198	6.5413	2.24841	1.40561	1.07042	2.27578	1.42484	1.08565	-0.0273683	-0.0192238	-0.0152282
6.0319	4.30151	4.29105	4.15318	4.34822	4.30738	4.20296	-0.0467091	-0.0163288	-0.0497785	6.5534	1.97131	1.53346	1.73066	1.932	1.534	1.7513	0.0393152	-0.000543118	-0.0206324	7.0719	0.817218	0.703308	0.688256	0.882522	0.709053	0.694977	-0.0653043	-0.00574422	-0.0067209	6.0433	8.31159	3.90955	3.01893	8.23164	3.98786	3.08868	0.0799465	-0.0783117	-0.0697422	6.5421	2.24758	1.41136	1.07442	2.28274	1.42804	1.09201	-0.0351593	-0.016679	-0.0175945
6.0327	4.3685	4.30124	4.17843	4.4216	4.31383	4.22223	-0.0531011	-0.0125833	-0.0438032	6.5542	1.98581	1.5351	1.73826	1.96693	1.53647	1.75995	0.0188804	-0.00137329	-0.0216854	7.0727	0.823078	0.705238	0.695306	0.896633	0.710204	0.69844	-0.073555	-0.00496602	-0.00313437	6.0441	8.37905	3.92241	3.04233	8.26656	3.99804	3.11289	0.112488	-0.0756292	-0.0705528	6.5428	2.24376	1.41201	1.07522	2.28895	1.43171	1.09934	-0.0451984	-0.0196995	-0.0241195
6.0334	4.44514	4.30418	4.20149	4.48682	4.32121	4.24442	-0.0416818	-0.0170269	-0.0429235	6.555	1.99943	1.53971	1.74953	2.00257	1.5393	1.76988	-0.00314331	0.000410199	-0.020348	7.0734	0.846848	0.707258	0.700176	0.909148	0.711214	0.701483	-0.0623	-0.00395536	-0.00130725	6.0448	8.42075	3.937	3.06664	8.29764	4.00698	3.13423	0.123108	-0.0699739	-0.0675917	6.5436	2.2507	1.41112	1.08563	2.29615	1.43539	1.10673	-0.0454493	-0.024272	-0.0211033
6.0342	4.524	4.29852	4.22393	4.56276	4.32861	4.26671	-0.0387635	-0.0300832	-0.0427761	6.5557	2.02511	1.54533	1.7591	2.03435	1.54213	1.77987	-0.00924182	0.00319672	-0.02077	7.0742	0.868628	0.711078	0.707516	0.923651	0.712368	0.704975	-0.0550232	-0.00128984	0.00254107	6.0456	8.44149	3.95094	3.09034	8.33378	4.0172	3.15878	0.107708	-0.0662684	-0.0684347	6.5443	2.26526	1.41412	1.09714	2.30254	1.43862	1.11326	-0.0372727	-0.0245082	-0.0161166
6.035	4.59882	4.30276	4.24595	4.63987	4.33509	4.2863	-0.0410523	-0.0323234	-0.0403481	6.5565	2.05152	1.55544	1.77299	2.07121	1.54461	1.78867	-0.0196939	0.0108224	-0.0156792	7.075	0.879118	0.715788	0.721056	0.938388	0.713381	0.70805	-0.0592704	0.00240755	0.0130057	6.0463	8.45527	3.96436	3.11252	8.36609	4.02747	3.18358	0.0891762	-0.063107	-0.0710592	6.5451	2.27569	1.41853	1.10014	2.30995	1.44233	1.12076	-0.0342584	-0.0237912	-0.0206181
6.0357	4.67097	4.31936	4.26239	4.70832	4.3425	4.30879	-0.0373497	-0.023139	-0.0463939	6.5572	2.09511	1.55716	1.78327	2.10393	1.54746	1.79878	-0.00881886	0.00969779	-0.0155088	7.0757	0.897378	0.726608	0.733536	0.951524	0.71454	0.71158	-0.0541461	0.0120683	0.0219557	6.0471	8.44808	3.98058	3.13541	8.40372	4.03647	3.20544	0.0443544	-0.0558972	-0.0700231	6.5459	2.27076	1.4188	1.09944	2.31751	1.44557	1.12736	-0.0467529	-0.0267731	-0.0279222
6.0365	4.74094	4.33434	4.27688	4.78774	4.34994	4.33142	-0.0468035	-0.015594	-0.0545354	6.558	2.15506	1.56064	1.78845	2.1421	1.54995	1.80767	0.0129638	0.010685	-0.0192161	7.0765	0.912568	0.737188	0.742976	0.966731	0.715701	0.715127	-0.0541632	0.0214872	0.0278486	6.0478	8.46795	3.99613	3.15973	8.43721	4.04679	3.23058	0.030735	-0.0506549	-0.0708485	6.5466	2.24828	1.41616	1.10375	2.32423	1.44929	1.13498	-0.075953	-0.0331303	-0.0312304
6.0372	4.81048	4.34361	4.29825	4.85871	4.35645	4.35133	-0.0482311	-0.0128407	-0.0530791	6.5587	2.20649	1.56092	1.80313	2.17611	1.55281	1.81788	0.0303855	0.00811064	-0.0147461	7.0772	0.936318	0.740558	0.750546	0.980208	0.716718	0.718243	-0.0438902	0.02384	0.0323031	6.0486	8.5193	4.00758	3.1845	8.47617	4.05583	3.25272	0.0431309	-0.0482469	-0.0682125	6.5474	2.22935	1.41603	1.11095	2.33203	1.45302	1.14266	-0.10268	-0.0369884	-0.0317053
6.038	4.87781	4.34308	4.32047	4.94091	4.36391	4.37419	-0.0631027	-0.0208311	-0.05372	6.5595	2.23132	1.55885	1.80802	2.21555	1.55567	1.82815	0.0157666	0.00318146	-0.0201277	7.078	0.962748	0.745038	0.752806	0.995864	0.717883	0.721824	-0.0331159	0.0271554	0.0309824	6.0494	8.57913	4.01794	3.20642	8.51597	4.06619	3.27826	0.0631628	-0.0482578	-0.0718327	6.5481	2.2274	1.42013	1.11587	2.33895	1.45629	1.14942	-0.111549	-0.0361598	-0.0335512
6.0387	4.95032	4.34836	4.33925	5.01384	4.37045	4.39428	-0.0635176	-0.0220881	-0.055027	6.5603	2.25783	1.56297	1.82471	2.25565	1.55817	1.83719	0.00217795	0.00479388	-0.0124816	7.0787	0.971778	0.745808	0.753316	1.00981	0.71905	0.725425	-0.0380318	0.0267584	0.0278914	6.0501	8.63903	4.03235	3.22482	8.55157	4.07659	3.304	0.0874538	-0.0442443	-0.0791774	6.5489	2.24284	1.42464	1.12488	2.34702	1.46004	1.15721	-0.104185	-0.0354013	-0.0323319
6.0395	5.0337	4.35675	4.35858	5.09846	4.37794	4.41737	-0.0647573	-0.0211844	-0.0587888	6.561	2.29257	1.56177	1.84024	2.29139	1.56104	1.84758	0.00118399	0.000722885	-0.00733769	7.0795	0.965438	0.743228	0.754556	1.02596	0.720073	0.728588	-0.0605178	0.0231557	0.0259675	6.0509	8.68782	4.04762	3.24765	8.59295	4.08571	3.32668	0.0948658	-0.0380826	-0.0790234	6.5497	2.26424	1.43143	1.1341	2.35523	1.46379	1.16505	-0.0909858	-0.0323634	-0.0309539
6.0403	5.15063	4.35731	4.38071	5.18483	4.38543	4.44059	-0.0342026	-0.028121	-0.0598736	6.5618	2.34176	1.56963	1.84205	2.33301	1.56356	1.85671	0.00874996	0.00606728	-0.0146558	7.0803	0.955258	0.744238	0.760376	1.04233	0.721243	0.732221	-0.0870767	0.022995	0.0281549	6.0516	8.73622	4.05962	3.27291	8.62975	4.09615	3.35278	0.106469	-0.0365314	-0.0798626	6.5504	2.27926	1.43893	1.14244	2.36252	1.46709	1.17198	-0.0832648	-0.0281624	-0.0295465
6.041	5.2564	4.35601	4.40463	5.2616	4.39201	4.461	-0.00519609	-0.0359941	-0.0563703	6.5625	2.39149	1.5708	1.85745	2.37	1.56644	1.86721	0.0214906	0.00435543	-0.00975788	7.081	0.959578	0.746238	0.762626	1.05688	0.722269	0.735416	-0.0972984	0.0239692	0.02721	6.0524	8.7811	4.06697	3.29668	8.67275	4.10663	3.3791	0.108352	-0.0396519	-0.0824194	6.5512	2.28295	1.44552	1.14903	2.37099	1.47087	1.17996	-0.0880361	-0.0253452	-0.0309242
6.0418	5.34235	4.36286	4.42638	5.35057	4.39953	4.48445	-0.00822544	-0.0366693	-0.0580645	6.5633	2.41848	1.5739	1.87395	2.41294	1.56933	1.87777	0.00554109	0.00456941	-0.00381672	7.0818	0.991038	0.744198	0.757946	1.07381	0.723444	0.739086	-0.0827675	0.0207543	0.0188599	6.0531	8.82036	4.07695	3.31978	8.71121	4.11582	3.40233	0.109151	-0.0388694	-0.08255	6.5519	2.30764	1.45054	1.15353	2.37855	1.47418	1.18698	-0.0709083	-0.0236367	-0.0334492
6.0425	5.40948	4.3749	4.45168	5.42945	4.40707	4.50801	-0.0199704	-0.0321674	-0.0563269	6.5641	2.44007	1.57505	1.88633	2.45663	1.57186	1.88706	-0.0165567	0.00318885	-0.000725746	7.0825	1.02812	0.737848	0.753636	1.08883	0.72462	0.742772	-0.0607076	0.0132284	0.0108641	6.0539	8.85216	4.08796	3.34277	8.75589	4.12634	3.42904	0.0962725	-0.0383739	-0.086267	6.5527	2.34704	1.45203	1.16307	2.38733	1.47798	1.19506	-0.0402918	-0.0259477	-0.0319878
6.0433	5.46723	4.37559	4.47789	5.52153	4.41368	4.52876	-0.0543041	-0.0380878	-0.0508699	6.5648	2.47881	1.57621	1.88518	2.4957	1.57476	1.89773	-0.0168929	0.00145137	-0.0125461	7.0833	1.07201	0.733218	0.747696	1.10623	0.725651	0.746011	-0.0342185	0.00756741	0.00168443	6.0547	8.87844	4.09787	3.36528	8.80147	4.13557	3.45257	0.0769672	-0.0376992	-0.087286	6.5534	2.38299	1.45943	1.1729	2.39513	1.48179	1.20322	-0.0121441	-0.0223531	-0.0303198
6.0441	5.52938	4.37822	4.50288	5.61504	4.42124	4.55257	-0.0856586	-0.0430193	-0.0496869	6.5656	2.53244	1.58053	1.89939	2.54101	1.57766	1.90846	-0.00857353	0.00286794	-0.00906765	7.0841	1.12293	0.726148	0.745246	1.12388	0.726831	0.749734	-0.000950813	-0.000682831	-0.00448775	6.0554	8.91797	4.1071	3.38617	8.84214	4.14615	3.47969	0.0758305	-0.039053	-0.0935202	6.5542	2.41468	1.46297	1.17369	2.40419	1.48513	1.21041	0.0104876	-0.0221548	-0.0367259
6.0448	5.61245	4.39385	4.52519	5.69807	4.42788	4.57352	-0.0856228	-0.0340238	-0.0483236	6.5663	2.58433	1.57912	1.92235	2.58125	1.5802	1.91791	0.00308514	-0.00108778	0.00443947	7.0848	1.1641	0.719348	0.743396	1.13963	0.728014	0.753478	0.0244684	-0.0086658	-0.0100818	6.0562	8.96224	4.11514	3.40816	8.8897	4.15676	3.50706	0.0725365	-0.0416183	-0.0988927	6.555	2.44009	1.46118	1.18094	2.41344	1.48895	1.21868	0.02665	-0.0277659	-0.0377442
6.0456	5.70596	4.40943	4.54908	5.79439	4.43546	4.59754	-0.0884314	-0.0260296	-0.0484619	6.5671	2.62579	1.58514	1.93843	2.62803	1.58312	1.92877	-0.0022397	0.00201797	0.00966489	7.0856	1.20922	0.718688	0.739306	1.15788	0.72905	0.756768	0.051342	-0.0103621	-0.0174618	6.0569	9.01004	4.12534	3.43314	8.93209	4.16607	3.53116	0.0779495	-0.0407276	-0.0980163	6.5557	2.46738	1.46937	1.19487	2.42169	1.49278	1.22702	0.045687	-0.0234112	-0.0321531
6.0463	5.80085	4.41751	4.57247	5.88023	4.44307	4.62175	-0.0793772	-0.025558	-0.0492764	6.5678	2.64917	1.58614	1.94903	2.66985	1.58567	1.93831	-0.0206814	0.000464082	0.0107238	7.0863	1.24984	0.714198	0.740986	1.17405	0.730237	0.760545	0.0757852	-0.0160382	-0.0195587	6.0577	9.05829	4.13282	3.45589	8.98142	4.17672	3.55888	0.0768709	-0.0439038	-0.102988	6.5565	2.49705	1.47705	1.20777	2.43127	1.49615	1.23438	0.0657856	-0.0191	-0.0266083
6.0471	5.91271	4.43038	4.59667	5.97991	4.44974	4.64303	-0.067205	-0.0193543	-0.0463538	6.5686	2.6564	1.59085	1.94909	2.71835	1.5886	1.94927	-0.0619464	0.00225115	-0.000175238	7.0871	1.27098	0.711988	0.742126	1.19281	0.731276	0.763864	0.078171	-0.0192878	-0.0217378	6.0585	9.09604	4.1389	3.47708	9.0317	4.18741	3.58683	0.0643377	-0.048512	-0.109745	6.5572	2.52592	1.4816	1.21619	2.43977	1.50001	1.24285	0.0861554	-0.0184113	-0.026655
6.0478	6.0304	4.45033	4.62463	6.06839	4.45737	4.66746	-0.0379891	-0.00703669	-0.0428238	6.5694	2.66911	1.59542	1.94601	2.76764	1.59153	1.96031	-0.0985324	0.00388968	-0.0142971	7.0878	1.28831	0.712528	0.743726	1.20953	0.732466	0.767678	0.0787771	-0.0199378	-0.0239516	6.0592	9.11799	4.14577	3.50176	9.07691	4.19679	3.61152	0.0410814	-0.0510259	-0.109758	6.558	2.55742	1.48712	1.21475	2.4497	1.50339	1.25031	0.10772	-0.0162714	-0.0355653
6.0486	6.12512	4.45887	4.65319	6.17102	4.46406	4.68892	-0.0458984	-0.00518322	-0.0357261	6.5701	2.70527	1.59831	1.939	2.81145	1.5941	1.97002	-0.106179	0.00421059	-0.0310166	7.0886	1.28845	0.709338	0.748526	1.2289	0.733658	0.771512	0.0595436	-0.0243201	-0.0229861	6.06	9.13906	4.15082	3.52425	9.12945	4.20754	3.63992	0.0096035	-0.0567241	-0.115671	6.5587	2.58343	1.48516	1.21698	2.45855	1.50726	1.2589	0.124878	-0.0221043	-0.0419232
6.0494	6.2096	4.46851	4.67776	6.2755	4.47171	4.7136	-0.0658998	-0.00320005	-0.0358391	6.5709	2.766	1.60706	1.95198	2.86262	1.59704	1.98117	-0.0966203	0.0100192	-0.0291884	7.0894	1.26872	0.713448	0.753376	1.24856	0.734703	0.774881	0.0201588	-0.0212548	-0.0215049	6.0607	9.17819	4.15358	3.5432	9.17625	4.21696	3.66494	0.00194073	-0.0633831	-0.121733	6.5595	2.58909	1.48687	1.22743	2.46883	1.51115	1.26756	0.120261	-0.0242804	-0.0401298
6.0501	6.31	4.4815	4.70063	6.36864	4.47939	4.73842	-0.0586367	0.0021162	-0.0377917	6.5716	2.85173	1.6057	1.9703	2.90811	1.59998	1.99238	-0.0563838	0.00571239	-0.0220807	7.0901	1.26157	0.715098	0.755536	1.26598	0.735899	0.778749	-0.00441408	-0.0208011	-0.0232133	6.0615	9.22273	4.15931	3.5593	9.23077	4.22776	3.69373	-0.00804234	-0.0684466	-0.134426	6.5603	2.57036	1.49048	1.23766	2.47929	1.51456	1.2752	0.0910754	-0.0240768	-0.0375402
6.0509	6.41727	4.4911	4.7271	6.47656	4.48611	4.76024	-0.0592885	0.00499153	-0.0331378	6.5724	2.94577	1.61574	1.99593	2.96091	1.60257	2.00226	-0.0151372	0.0131685	-0.00632489	7.0909	1.2675	0.717018	0.755626	1.28628	0.736948	0.782154	-0.0187819	-0.0199292	-0.0265279	6.0622	9.27356	4.16788	3.58486	9.27977	4.23859	3.72279	-0.0062151	-0.0707073	-0.13793	6.561	2.55234	1.49201	1.25263	2.48862	1.51846	1.284	0.0637197	-0.0264502	-0.0313632
6.0516	6.53489	4.50373	4.75434	6.57227	4.49381	4.78529	-0.0373759	0.00992298	-0.0309515	6.5731	3.00342	1.61567	2.02857	3.00779	1.60553	2.0136	-0.00437379	0.0101416	0.0149775	7.0916	1.28358	0.720548	0.761086	1.30431	0.738147	0.78606	-0.0207326	-0.0175991	-0.0249739	6.063	9.34618	4.17514	3.61065	9.33675	4.24809	3.74842	0.00942802	-0.0729499	-0.137764	6.5618	2.53806	1.49814	1.26294	2.49951	1.52189	1.29174	0.0385585	-0.0237471	-0.028795
6.0524	6.65019	4.51428	4.7796	6.68366	4.50152	4.81049	-0.0334725	0.0127583	-0.0308928	6.5739	3.05617	1.61857	2.04957	3.06257	1.60812	2.02357	-0.00639415	0.0104489	0.0260046	7.0924	1.31832	0.719028	0.771866	1.32519	0.739349	0.789987	-0.0068748	-0.0203211	-0.0181211	6.0638	9.42505	4.17893	3.63072	9.39487	4.25897	3.7779	0.0301809	-0.0800395	-0.147177	6.5625	2.51494	1.50439	1.26634	2.50919	1.52581	1.30067	0.00575423	-0.0214276	-0.0343249
6.0531	6.74716	4.52057	4.80207	6.78291	4.50829	4.83267	-0.035748	0.0122867	-0.0305982	6.5747	3.10838	1.62185	2.05857	3.11824	1.61109	2.03503	-0.0098629	0.0107603	0.0235472	7.0931	1.33923	0.728438	0.774036	1.34369	0.740403	0.793437	-0.00446486	-0.0119646	-0.0194006	6.0645	9.48998	4.18842	3.65418	9.44661	4.26988	3.8076	0.0433683	-0.0814595	-0.15342	6.5633	2.4929	1.50802	1.2712	2.52045	1.52975	1.30967	-0.0275493	-0.0217261	-0.0384638
6.0539	6.82621	4.52644	4.82775	6.89784	4.51602	4.85811	-0.0716281	0.0104203	-0.0303607	6.5754	3.15359	1.6185	2.04752	3.16773	1.61406	2.04656	-0.0141411	0.00443506	0.000963449	7.0939	1.34279	0.731468	0.783026	1.36525	0.741609	0.797403	-0.0224581	-0.0101409	-0.0143774	6.0653	9.54679	4.20023	3.67802	9.50739	4.27945	3.83382	0.0393944	-0.0792208	-0.155794	6.5641	2.48267	1.51183	1.27679	2.53192	1.5332	1.3176	-0.0492446	-0.0213696	-0.0408057
6.0547	6.93224	4.53319	4.85433	7.01468	4.52281	4.88048	-0.0824356	0.0103879	-0.0261488	6.5762	3.20929	1.63244	2.05697	3.2252	1.61667	2.05671	-0.015914	0.0157667	0.000264406	7.0947	1.35787	0.730308	0.789996	1.38713	0.742817	0.80139	-0.0292628	-0.0125091	-0.0113945	6.066	9.60173	4.20972	3.70469	9.56163	4.29043	3.86401	0.0401001	-0.0807099	-0.159313	6.5648	2.48581	1.5172	1.28611	2.5422	1.53716	1.32672	-0.056386	-0.0199587	-0.0406151
6.0554	7.0736	4.53729	4.87741	7.11852	4.53057	4.9062	-0.0449238	0.00672054	-0.0287848	6.5769	3.26574	1.62727	2.06747	3.27654	1.61965	2.06836	-0.0107996	0.00761259	-0.000884056	7.0954	1.38356	0.739738	0.795186	1.40655	0.743876	0.804894	-0.0229943	-0.00413799	-0.00970781	6.0668	9.66501	4.21862	3.73079	9.62476	4.30004	3.8906	0.0402451	-0.0814199	-0.159803	6.5656	2.50693	1.51866	1.293	2.55414	1.54112	1.33592	-0.0472085	-0.0224669	-0.0429244
6.0562	7.24175	4.54247	4.90045	7.23945	4.53836	4.93206	0.00229788	0.00411701	-0.0316119	6.5777	3.33391	1.638	2.08495	3.33617	1.62227	2.0786	-0.0022614	0.0157262	0.00635195	7.0962	1.41134	0.736568	0.806406	1.42906	0.745088	0.808913	-0.0177226	-0.00851941	-0.00250733	6.0676	9.72621	4.22997	3.75658	9.68917	4.31106	3.92118	0.0370359	-0.0810919	-0.164599	6.5663	2.53515	1.51986	1.30155	2.56476	1.5446	1.34405	-0.0296047	-0.024742	-0.0424984
6.0569	7.3609	4.54933	4.92371	7.34682	4.54518	4.9548	0.0140767	0.00415611	-0.0310888	6.5785	3.39667	1.63514	2.09412	3.39679	1.62527	2.09039	-0.000120401	0.00986874	0.00373626	7.0969	1.44767	0.739458	0.807866	1.44908	0.74615	0.812451	-0.00141454	-0.00669169	-0.00458467	6.0683	9.78649	4.2436	3.78375	9.74694	4.32211	3.95206	0.0395517	-0.0785108	-0.168302	6.5671	2.55178	1.52601	1.3132	2.57713	1.54859	1.35339	-0.0253491	-0.0225799	-0.0401889
6.0577	7.45938	4.55375	4.94907	7.47133	4.55298	4.98089	-0.0119486	0.000772476	-0.0318222	6.5792	3.45585	1.63177	2.09911	3.45062	1.62827	2.10224	0.00522614	0.00349522	-0.00313067	7.0977	1.47934	0.748128	0.809016	1.47233	0.747366	0.816515	0.00700307	0.000761986	-0.00749874	6.0691	9.83757	4.2549	3.81362	9.81436	4.33181	3.9793	0.0232096	-0.07691	-0.165673	6.5678	2.55953	1.52993	1.32161	2.58821	1.55209	1.36162	-0.0286798	-0.0221611	-0.0400134
6.0585	7.54922	4.56171	4.97075	7.59775	4.5608	5.00713	-0.0485272	0.000910759	-0.0363822	6.58	3.52204	1.64509	2.12669	3.51343	1.6309	2.11267	0.00860643	0.0141832	0.0140245	7.0985	1.50602	0.734078	0.817266	1.49593	0.748585	0.820598	0.0100925	-0.0145066	-0.00333214	6.0698	9.90368	4.26957	3.84171	9.87447	4.34292	4.01064	0.0292072	-0.0733562	-0.168922	6.5686	2.5735	1.53549	1.33679	2.60109	1.55609	1.3711	-0.0275846	-0.0205982	-0.0343029
6.0592	7.64856	4.56738	4.99261	7.71078	4.56766	5.03025	-0.0622215	-0.000277519	-0.0376348	6.5807	3.58073	1.62311	2.12284	3.5694	1.63392	2.12464	0.0113275	-0.0108105	-0.00180101	7.0992	1.53248	0.741118	0.815546	1.51685	0.749652	0.824185	0.0156326	-0.00853395	-0.00863934	6.0706	9.99988	4.28409	3.86577	9.94452	4.35266	4.03823	0.0553532	-0.0685725	-0.172455	6.5694	2.60832	1.54259	1.3494	2.6142	1.56011	1.38066	-0.00588036	-0.0175189	-0.0312639
6.06	7.74652	4.574	5.01575	7.84171	4.57551	5.05678	-0.0951948	-0.00150967	-0.0410242	6.5815	3.64409	1.64475	2.15157	3.63433	1.63694	2.13668	0.00976157	0.00781178	0.0148923	7.1	1.58014	0.750628	0.819206	1.54115	0.750874	0.828307	0.03899	-0.000246048	-0.00910079	6.0713	10.0869	4.30089	3.8948	10.0073	4.36382	4.07002	0.0796089	-0.0629358	-0.175216	6.5701	2.66368	1.54734	1.35852	2.62588	1.56364	1.3891	0.0377932	-0.0162925	-0.0305787
6.0607	7.85314	4.57977	5.0367	7.95788	4.58239	5.08009	-0.104736	-0.00261879	-0.0433869	6.5822	3.71082	1.6312	2.15828	3.69195	1.63958	2.14729	0.0188665	-0.00838614	0.0109932	7.1007	1.61436	0.732198	0.824576	1.5628	0.752098	0.83245	0.0515602	-0.0198998	-0.00787413	6.0721	10.1502	4.31722	3.92571	10.0807	4.37502	4.10211	0.0695782	-0.0578027	-0.176394	6.5709	2.73783	1.553	1.36671	2.63956	1.56767	1.3988	0.0982685	-0.0146705	-0.0320911
6.0615	7.97574	4.58023	5.05797	8.09268	4.59027	5.10687	-0.116937	-0.010035	-0.0488939	6.583	3.77058	1.63049	2.1689	3.75919	1.64261	2.15947	0.011394	-0.0121275	0.00943089	7.1015	1.63122	0.740128	0.822406	1.58786	0.753171	0.836093	0.0433547	-0.0130429	-0.0136875	6.0729	10.2015	4.33201	3.95301	10.1555	4.38484	4.13038	0.0459633	-0.0528297	-0.177363	6.5716	2.79054	1.56077	1.37626	2.65176	1.57172	1.40857	0.138788	-0.0109539	-0.0323118
6.0622	8.11813	4.58584	5.07999	8.21313	4.59816	5.13381	-0.0950031	-0.0123148	-0.0538154	6.5838	3.81573	1.65828	2.19202	3.82766	1.64527	2.17018	-0.0119338	0.0130063	0.0218425	7.1022	1.64803	0.753188	0.829456	1.61008	0.7544	0.840276	0.0379496	-0.0012114	-0.0108196	6.0736	10.2462	4.34985	3.98415	10.2222	4.39609	4.16291	0.0240421	-0.046247	-0.178756	6.5724	2.80835	1.56701	1.38496	2.66593	1.57527	1.4172	0.142417	-0.00826383	-0.0322378
6.063	8.26846	4.5859	5.10178	8.35267	4.60508	5.1575	-0.0842075	-0.0191731	-0.0557232	6.5845	3.85075	1.62549	2.17788	3.88856	1.64831	2.18249	-0.0378056	-0.0228257	-0.00460505	7.103	1.67857	0.736728	0.841906	1.63589	0.755476	0.843951	0.0426826	-0.0187476	-0.00204504	6.0744	10.2917	4.36524	4.01669	10.3003	4.40737	4.19569	-0.00863934	-0.0421324	-0.178992	6.5731	2.82427	1.57065	1.38984	2.67855	1.57934	1.42713	0.145714	-0.00869679	-0.0372874
6.0638	8.40741	4.5872	5.12369	8.49435	4.613	5.18471	-0.0869436	-0.0257921	-0.0610218	6.5853	3.90044	1.67074	2.22284	3.95925	1.65136	2.19488	-0.0588059	0.0193752	0.027962	7.1038	1.69964	0.741158	0.841116	1.66216	0.756709	0.848177	0.0374827	-0.0155504	-0.00706077	6.0751	10.3414	4.37501	4.04657	10.3704	4.41727	4.22465	-0.0289402	-0.0422664	-0.178074	6.5739	2.82752	1.57607	1.39827	2.69334	1.58291	1.43588	0.134179	-0.00684416	-0.037609
6.0645	8.54996	4.59185	5.14884	8.62003	4.62093	5.21206	-0.0700712	-0.0290761	-0.0632186	6.586	3.98016	1.64781	2.20739	4.02221	1.65403	2.20578	-0.0420492	-0.00622702	0.00161409	7.1045	1.6936	0.763938	0.840526	1.68548	0.757942	0.85242	0.00812006	0.00599575	-0.0118943	6.0759	10.4103	4.3866	4.0751	10.4519	4.42861	4.25794	-0.0415678	-0.0420084	-0.182837	6.5747	2.80284	1.58285	1.40308	2.70842	1.587	1.44595	0.0944214	-0.00415349	-0.0428685
6.0653	8.7097	4.5974	5.17199	8.76676	4.62788	5.23613	-0.0570641	-0.0304799	-0.0641341	6.5868	4.05411	1.64442	2.23083	4.09556	1.65709	2.21829	-0.0414457	-0.0126746	0.0125446	7.1053	1.68946	0.751018	0.854646	1.7125	0.759024	0.856151	-0.0230405	-0.00800586	-0.0015049	6.0766	10.4896	4.39965	4.10828	10.5245	4.43855	4.28728	-0.0348883	-0.0389009	-0.178993	6.5754	2.77414	1.58337	1.41146	2.72185	1.5911	1.45611	0.0522854	-0.00773191	-0.0446523
6.066	8.87286	4.60448	5.19972	8.8971	4.63585	5.26377	-0.0242434	-0.0313635	-0.0640521	6.5876	4.1381	1.6809	2.25914	4.17017	1.66016	2.23087	-0.0320644	0.0207403	0.0282695	7.106	1.70656	0.732978	0.856746	1.73647	0.760263	0.860434	-0.0299163	-0.0272844	-0.00368834	6.0774	10.5661	4.40789	4.1451	10.6096	4.44995	4.32105	-0.04354	-0.042057	-0.175945	6.5762	2.76095	1.58804	1.41762	2.7375	1.5947	1.46507	0.0234485	-0.00666606	-0.0474535
6.0668	9.03986	4.60965	5.22481	9.04819	4.64283	5.28807	-0.00832939	-0.0331717	-0.0632615	6.5883	4.22785	1.62907	2.22971	4.23641	1.66284	2.24196	-0.00856304	-0.0337774	-0.0122433	7.1068	1.73398	0.744848	0.858106	1.76439	0.761504	0.864744	-0.0304103	-0.0166554	-0.00663817	6.0782	10.6416	4.41372	4.17929	10.6968	4.46138	4.35516	-0.0551834	-0.0476646	-0.175866	6.5769	2.76163	1.59585	1.42703	2.75152	1.59882	1.47538	0.0101094	-0.00296903	-0.048346
6.0676	9.20902	4.6163	5.25032	9.2016	4.65081	5.31596	0.00741577	-0.0345058	-0.0656404	6.5891	4.29402	1.68346	2.29046	4.31341	1.66592	2.25469	-0.0193901	0.0175353	0.0357733	7.1076	1.75579	0.764938	0.877616	1.79273	0.762591	0.868533	-0.0369377	0.00234723	0.00908303	6.0789	10.712	4.4215	4.21388	10.7747	4.47141	4.38522	-0.0626545	-0.0499034	-0.171333	6.5777	2.77124	1.60152	1.43884	2.76785	1.60244	1.48446	0.00338936	-0.000911474	-0.0456188
6.0683	9.36588	4.62359	5.28088	9.33841	4.65881	5.34403	0.0274649	-0.0352206	-0.0631514	6.5898	4.38719	1.67141	2.27669	4.38229	1.66862	2.26588	0.0049057	0.00278854	0.0108087	7.1083	1.77646	0.765038	0.889776	1.81785	0.763836	0.872882	-0.0413923	0.00120234	0.0168941	6.0797	10.7712	4.43001	4.24677	10.8654	4.48289	4.4198	-0.0942144	-0.0528784	-0.173027	6.5785	2.78812	1.60337	1.44708	2.78451	1.60658	1.49493	0.00361681	-0.00321436	-0.0478493
6.0691	9.50019	4.6357	5.30968	9.49731	4.66583	5.36873	0.0028801	-0.0301275	-0.0590515	6.5906	4.46631	1.64324	2.28947	4.46215	1.6717	2.27874	0.00415659	-0.0284675	0.010736	7.1091	1.80101	0.753778	0.884176	1.84696	0.764926	0.876702	-0.0459533	-0.0111482	0.00747418	6.0804	10.8445	4.43785	4.28025	10.9466	4.4944	4.45462	-0.102057	-0.0565491	-0.174367	6.5792	2.81385	1.60477	1.46249	2.79933	1.61074	1.50549	0.0145159	-0.00597012	-0.0429922
6.0698	9.64167	4.64879	5.34091	9.63834	4.67386	5.39709	0.00332928	-0.0250702	-0.0561781	6.5913	4.55352	1.70485	2.32762	4.53307	1.6748	2.29168	0.0204477	0.0300477	0.0359395	7.1098	1.85156	0.748458	0.889916	1.87294	0.766175	0.881092	-0.0213802	-0.0177169	0.00882363	6.0812	10.9475	4.45114	4.31281	11.0417	4.5045	4.48537	-0.0941782	-0.0533681	-0.172558	6.58	2.84889	1.61165	1.47131	2.8167	1.61438	1.51479	0.0321927	-0.00272918	-0.0434828
6.0706	9.79199	4.6603	5.3701	9.80194	4.6809	5.42201	-0.00995255	-0.0205979	-0.0519037	6.5921	4.63986	1.65892	2.31569	4.61555	1.67751	2.30308	0.0243111	-0.0185953	0.0126171	7.1106	1.93307	0.791858	0.897796	1.90303	0.767426	0.885508	0.030036	0.0244319	0.0122881	6.082	11.0536	4.47034	4.34936	11.1388	4.51608	4.52078	-0.0852242	-0.0457468	-0.171421	6.5807	2.87462	1.61085	1.48611	2.83223	1.61855	1.52549	0.0423858	-0.00770617	-0.0393827
6.0713	9.97488	4.67264	5.40045	9.94775	4.68896	5.45063	0.0271311	-0.016314	-0.0501814	6.5929	4.72825	1.67587	2.3491	4.69979	1.68062	2.31616	0.0284586	-0.00475121	0.0329435	7.1113	1.99221	0.799458	0.921926	1.92971	0.768523	0.889387	0.062494	0.0309358	0.0325385	6.0827	11.1653	4.49232	4.38407	11.2255	4.52623	4.55198	-0.060215	-0.0339112	-0.167903	6.5815	2.87964	1.61435	1.50253	2.8503	1.62274	1.53628	0.0293365	-0.00838697	-0.0337478
6.0721	10.1738	4.68586	5.42997	10.1171	4.69703	5.47945	0.0566921	-0.0111713	-0.0494766	6.5936	4.81017	1.70132	2.34886	4.77473	1.68373	2.32931	0.0354357	0.0175872	0.0195487	7.1121	2.02574	0.780608	0.915206	1.96065	0.769778	0.893842	0.0650896	0.0108304	0.0213642	6.0835	11.2792	4.51193	4.41831	11.3267	4.53787	4.58788	-0.0474844	-0.0259414	-0.169566	6.5822	2.87517	1.6207	1.51553	2.86638	1.62641	1.54581	0.0087862	-0.00571215	-0.0302718
6.0729	10.3397	4.69837	5.45987	10.2891	4.70411	5.50478	0.0506124	-0.00573826	-0.0449038	6.5944	4.88944	1.66084	2.37542	4.86171	1.68646	2.34089	0.0277338	-0.0256206	0.0345345	7.1129	2.04764	0.743858	0.916676	1.99216	0.770878	0.897759	0.0554746	-2.19551	-1.01434	6.0842	11.3986	4.52846	4.45346	11.4178	4.54953	4.62408	-0.0191994	-0.02107	-0.170611	6.583	2.87285	1.62467	1.53778	2.88523	1.63062	1.55677	-0.0123727	-0.00595069	-0.0189904
6.0736	10.484	4.71182	5.49217	10.4417	4.71221	5.53386	0.0423632	-0.000391483	-0.0416875	6.5951	4.99725	1.70783	2.35651	4.93895	1.68958	2.35419	0.0582991	0.0182472	0.0023222	7.1136	2.06599	0.746088	0.93489	2.02018	0.772136	0.902258	0.0458121	-2.19328	-0.996126	6.085	11.5051	4.54311	4.48427	11.5238	4.55976	4.65603	-0.0187225	-0.0166535	-0.17176	6.5838	2.87452	1.63586	1.54629	2.90449	1.63431	1.56642	-0.0299664	0.00154722	-0.0201312
6.0744	10.6299	4.72877	5.5247	10.6193	4.72033	5.56309	0.0105801	0.00844145	-0.0383887	6.5959	5.13502	1.69983	2.38259	5.02919	1.69232	2.36589	0.105828	0.00750947	0.0166993											6.0857	11.5933	4.55476	4.52186	11.6184	4.57149	4.6928	-0.0251198	-0.0167255	-0.170935	6.5845	2.88382	1.63928	1.55747	2.92168	1.63854	1.57754	-0.037858	0.000739932	-0.0200711
6.0751	10.784	4.73895	5.55671	10.7776	4.72745	5.58884	0.00641823	0.0115047	-0.032125	6.5966	5.24162	1.6787	2.43891	5.10943	1.69545	2.37934	0.132195	1.45927	2.21833											6.0865	11.683	4.56694	4.56074	11.7288	4.58324	4.72984	-0.0458298	-0.0163078	-0.169097	6.5853	2.9105	1.6463	1.56815	2.9417	1.64278	1.58876	-0.0312009	0.00351644	-0.0206128
6.0759	10.9883	4.74558	5.58841	10.961	4.73559	5.61837	0.0273123	0.00999165	-0.0299611	6.5974	5.3439	1.7253	2.38886	5.20254	1.69859	2.39286	0.141365	1.50587	2.16828											6.0873	11.7732	4.57793	4.59862	11.8424	4.59355	4.76249	-0.0692368	-0.015624	-0.163866	6.586	2.943	1.65288	1.57317	2.9596	1.6465	1.59865	-0.0166049	0.00637698	-0.0254847
6.0766	11.2257	4.75249	5.62051	11.1236	4.74273	5.64434	0.102145	0.00976276	-0.0238323																					6.088	11.8835	4.59345	4.64416	11.944	4.60537	4.80014	-0.0604639	-0.0119276	-0.155974	6.5868	2.97382	1.65643	1.59026	2.98054	1.65076	1.61003	-0.00671816	0.005669	-0.019768
6.0774	11.4148	4.75812	5.65185	11.3129	4.7509	5.67417	0.101839	0.00721931	-0.0223217																					6.0888	12.0026	4.60416	4.6826	12.0624	4.61574	4.83331	-0.0597696	-0.0115829	-0.150702	6.5876	2.99057	1.67106	1.60059	3.00193	1.65504	1.62149	-0.0113521	0.0160204	-0.0209037
6.0782	11.5767	4.76362	5.68657	11.5057	4.7591	5.70421	0.0709658	0.00452614	-0.0176334																					6.0895	12.1256	4.61549	4.72367	12.1679	4.62761	4.87145	-0.042285	-0.0121174	-0.147779	6.5883	3.00861	1.67178	1.61507	3.02098	1.65879	1.63161	-0.0123665	0.0129948	-0.0165468
6.0789	11.7501	4.76537	5.71762	11.677	4.76628	5.73061	0.0731182	-0.000902653	-0.0129843																					6.0903	12.243	4.63328	4.76137	12.2921	4.63951	4.90991	-0.0490885	-0.00623465	-0.148535	6.5891	3.03773	1.67833	1.63692	3.04321	1.66308	1.64327	-0.00547504	0.0152497	-0.00635028
6.0797	11.9257	4.77005	5.74646	11.8756	4.77449	5.76092	0.050106	-0.00444078	-0.0144572																					6.091	12.3526	4.64585	4.80299	12.403	4.64996	4.94389	-0.0504322	-0.00411177	-0.140898	6.5898	3.06956	1.68441	1.64695	3.06319	1.66685	1.65353	0.00637007	0.0175613	-0.00658417
6.0804	12.1521	4.77447	5.77614	12.0521	4.78272	5.79137	0.0999641	-0.00824928	-0.0152254																					6.0918	12.471	4.66216	4.84559	12.5324	4.66193	4.98298	-0.0613918	0.000223637	-0.137385	6.5906	3.10434	1.68626	1.66451	3.08645	1.67117	1.66534	0.0178857	0.0150918	-0.000832081
6.0812	12.3509	4.78013	5.8089	12.2577	4.78994	5.81818	0.0931721	-0.00980616	-0.00927639																					6.0926	12.6351	4.67395	4.88433	12.6646	4.67243	5.0174	-0.0294895	0.00152254	-0.133067	6.5913	3.14732	1.70281	1.67896	3.10717	1.6755	1.67726	0.0401502	0.0273106	0.00169468
6.082	12.5546	4.79106	5.84144	12.4665	4.7982	5.84898	0.0880909	-0.00714016	-0.00753975																					6.0933	12.7821	4.6877	4.92908	12.7833	4.68445	5.05703	-0.00121689	0.00324059	-0.127946	6.5921	3.1784	1.70776	1.6888	3.13138	1.6793	1.68778	0.0470233	0.0284618	0.0010184
6.0827	12.7889	4.80211	5.86937	12.6518	4.80544	5.87605	0.137045	-0.00333118	-0.00668192																					6.0941	12.9184	4.70361	4.97018	12.9221	4.69651	5.09703	-0.00374413	0.00709867	-0.126849	6.5929	3.20199	1.71359	1.71703	3.15623	1.68365	1.69988	0.0457551	0.0299399	0.0171493
																														6.0948	13.0643	4.7107	5.01507	13.0461	4.7071	5.1323	0.0182838	0.0036006	-0.117229	6.5936	3.20451	1.73182	1.73813	3.17843	1.68801	1.71207	0.0260816	0.0438062	0.0260594
																														6.0956	13.1982	4.72666	5.06209	13.1907	4.71922	5.17288	0.00757217	0.00743818	-0.110791	6.5944	3.20922	1.73917	1.74103	3.20429	1.69184	1.72282	0.00492477	0.0473289	0.0182101
																														6.0964	13.3325	4.73936	5.10555	13.339	4.73137	5.21377	-0.00646305	0.0079813	-0.108218	6.5951	3.23136	1.73851	1.76175	3.22735	1.69622	1.7352	0.00400424	0.0422877	0.0265474
																														6.0971	13.473	4.75868	5.16032	13.4722	4.74204	5.24986	0.000759125	0.0166383	-0.0895338	6.5959	3.24185	1.74542	1.77831	3.25444	1.70007	1.74612	-0.0125937	0.04535	0.0321931
																														6.0979	13.6238	4.78581	5.21393	13.6275	4.75425	5.29139	-0.0037117	0.0315566	-0.0774579	6.5966	3.25984	1.75433	1.78748	3.27863	1.70448	1.75868	-0.0187852	0.0498517	0.0288012
																																								6.5974	3.30322	1.758	1.81883	3.30681	1.70889	1.77134	-0.00358677	0.0491035	0.0474899
																																								6.5982	3.34281	1.77323	1.85378	3.33559	1.71277	1.78252	0.00722194	0.0604578	0.0712568
																																								6.5989	3.36567	1.79829	1.85359	3.36146	1.71721	1.79538	0.00421715	0.0810755	0.0582104
																																								6.5997	3.39047	1.78867	1.85508	3.39164	1.72111	1.80671	-0.00116849	0.06756	0.0483721
																																								6.6004	3.42082	1.80027	1.90078	3.41856	1.72557	1.81975	0.00225782	0.0746957	0.0810244
																																								6.6012	3.44271	1.8389	1.91797	3.44997	1.73005	1.83293	-0.0072608	0.108849	0.0850409
																																								6.602	3.4608	1.82644	1.90331	3.48223	1.73398	1.84453	-0.0214257	0.092459	0.0587736
																																								6.6027	3.48607	1.80742	1.94747	3.51112	1.73848	1.85789	-0.0250535	0.0689441	0.0895767
																																								6.6035	3.51272	1.84621	1.99979	3.54477	1.74299	1.87134	-0.0320501	0.103219	0.128448
																																								6.6042	3.53984	1.86808	2.01827	3.57477	1.74695	1.88322	-0.0349336	0.121137	0.135046
																																								6.605	3.56809	1.8481	1.99926	3.60998	1.75148	1.8969	-0.0418987	0.0966144	0.102357
																																								6.6057	3.59382	1.8277	2.02584	3.64154	1.75546	1.90895	-0.0477133	0.0722399	0.11689
																																								6.6065	3.61766	1.8738	2.09676	3.6783	1.76002	1.92282	-0.0606408	0.390213	1.52677
																																								6.6073	3.64903	1.93175	2.12466	3.71586	1.76459	1.93681	-0.0668349	0.448163	1.55467
[truncated: 10 more columns]
