# Supplementary material for: RNA-directed activation of cytoplasmic dynein-1 in reconstituted transport RNPs
Source: eLife journal article supplement (doi:10.7554/elife.36312), 2018-06-26
Supplement: supp [file elife-36312-supp-v1.zip › elife_poa_e36312_Figure_6_figure_supplement_3_source_data_1.xlsx]

## Sheet: Sheet1
BICD2 elution volume (ml; for differential refractive index axis)	BICD2 differential refractive index (arbitrary units)	BICD2 elution volume (ml; for mean molar mass axis)	BICD2 mean molar mass (Da)	Egl/BICD2 -ILS elution volume (ml; for differential refractive index axis)	Egl/BICD2 -ILS differential refractive index (arbitrary units)	Egl/BICD2 -ILS elution volume (ml; for mean molar mass axis)	Egl/BICD2 -ILS mean molar mass (Da)	Egl/BICD2 +ILS elution volume (ml; for differential refractive index axis)	Egl/BICD2 +ILS differential refractive index (arbitrary units)	Egl/BICD2 +ILS elution volume (ml; for mean molar mass axis)	Egl/BICD2 +ILS mean molar mass (Da)
6.00067	0.00243056	11.0329	182926	6.00573	-0.000561586	10.7787	220395	6.00035	0.000158729	10.1007	361110
6.00857	0.00235912	11.0413	186498	6.01363	-0.000516899	10.7871	224200	6.00824	-0.000105376	10.1091	360629
6.01646	0.00235778	11.0497	186630	6.02152	-0.000497927	10.7956	223699	6.01614	-0.000135781	10.1175	359860
6.02436	0.00235645	11.0581	186466	6.02942	-0.000493941	10.804	223387	6.02403	-0.000166187	10.126	358865
6.03225	0.0022957	11.0666	186213	6.03731	-0.000489955	10.8124	222870	6.03193	-0.000290739	10.1344	357893
6.04015	0.00220591	11.075	185840	6.04521	-0.000413952	10.8208	222232	6.03982	-0.000243264	10.1428	357391
6.04804	0.00205417	11.0834	185612	6.0531	-0.000431832	10.8292	221693	6.04772	-0.000255102	10.1512	357020
6.05594	0.00204373	11.0918	185625	6.061	-0.000449713	10.8377	221192	6.05561	-0.00026694	10.1596	356214
6.06383	0.00203164	11.1002	185536	6.06889	-0.000508013	10.8461	220643	6.06351	-0.000389654	10.168	355545
6.07173	0.00201954	11.1086	185324	6.07679	-0.000493393	10.8545	220230	6.0714	-0.000586674	10.1765	355331
6.07962	0.00196186	11.1171	185058	6.08468	-0.000478774	10.8629	219899	6.0793	-0.000640063	10.1849	354633
6.08752	0.00174559	11.1255	184930	6.09258	-0.000606024	10.8713	219865	6.08719	-0.000596448	10.1933	354736
6.09541	0.00159562	11.1339	184943	6.10047	-0.000401447	10.8797	220107	6.09509	-0.000592617	10.2017	354539
6.10331	0.00142932	11.1423	184763	6.10837	-0.000173172	10.8882	220009	6.10298	-0.000625461	10.2101	353433
6.1112	0.00142952	11.1507	184415	6.11626	-0.000168945	10.8966	219746	6.11088	-0.000658305	10.2186	352530
6.1191	0.00142972	11.1591	184118	6.12416	-0.000164718	10.905	219644	6.11877	-0.000756573	10.227	351934
6.12699	0.00141468	11.1676	183937	6.13205	-0.000176918	10.9134	219616	6.12667	-0.000812326	10.2354	350917
6.13489	0.00137088	11.176	183941	6.13995	-0.000312492	10.9218	219639	6.13457	-0.000868079	10.2438	349774
6.14279	0.00132709	11.1844	184081	6.14784	-0.000207589	10.9302	219724	6.14246	-0.00102892	10.2522	348884
6.15068	0.0012994	11.1928	184231	6.15574	-0.000153028	10.9387	219901	6.15036	-0.00127617	10.2606	347994
6.15858	0.0012816	11.2012	184231	6.16363	-0.000111812	10.9471	219976	6.15825	-0.00126147	10.2691	347007
6.16647	0.00129738	11.2096	184220	6.17153	0.000218411	10.9555	219910	6.16615	-0.00124785	10.2775	346160
6.17437	0.00124871	11.2181	184320	6.17942	0.000223624	10.9639	219805	6.17404	-0.00125982	10.2859	345473
6.18226	0.00120005	11.2265	184388	6.18732	0.000228836	10.9723	219606	6.18194	-0.00127179	10.2943	344735
6.19016	0.00109253	11.2349	184381	6.19521	0.000172497	10.9807	219536	6.18983	-0.0012786	10.3027	344183
6.19805	0.00117024	11.2433	184470	6.20311	-6.52525e-06	10.9892	219655	6.19773	-0.00128541	10.3111	343661
6.20595	0.00119559	11.2517	184690	6.211	0.000266736	10.9976	219918	6.20562	-0.00133095	10.3196	342929
6.21384	0.00121268	11.2602	184867	6.2189	0.000334662	11.006	220150	6.21352	-0.00132987	10.328	342217
6.22174	0.00120487	11.2686	184877	6.2268	0.000566791	11.0144	220179	6.22141	-0.0013288	10.3364	341749
6.22963	0.00119706	11.277	184841	6.23469	0.000617936	11.0228	220232	6.22931	-0.00138826	10.3448	341164
6.23753	0.00110101	11.2854	184814	6.24259	0.000639552	11.0312	220556	6.2372	-0.00134277	10.3532	340111
6.24542	0.00105232	11.2938	184734	6.25048	0.000652312	11.0397	220952	6.2451	-0.00136932	10.3616	339255
6.25332	0.000985328	11.3022	184612	6.25838	0.000665072	11.0481	221114	6.25299	-0.00139587	10.3701	338685
6.26121	0.000971053	11.3107	184545	6.26627	0.000558985	11.0565	221099	6.26089	-0.00145816	10.3785	338080
6.26911	0.000956779	11.3191	184535	6.27417	0.000667984	11.0649	220989	6.26878	-0.00145603	10.3869	337230
6.277	0.000844369	11.3275	184579	6.28206	0.000822613	11.0733	220924	6.27668	-0.00134937	10.3953	336563
6.2849	0.00085185	11.3359	184718	6.28996	0.00115853	11.0818	220966	6.28457	-0.00131093	10.4037	336068
6.29279	0.000851816	11.3443	184912	6.29785	0.00126051	11.0902	220999	6.29247	-0.00127043	10.4121	335542
6.30069	0.000851781	11.3527	185071	6.30575	0.00136248	11.0986	221000	6.30036	-0.0012533	10.4206	335061
6.30858	0.000842268	11.3612	185163	6.31364	0.00141691	11.107	221059	6.30826	-0.00134103	10.429	334542
6.31648	0.000832755	11.3696	185213	6.32154	0.00141602	11.1154	221202	6.31615	-0.00142877	10.4374	333646
6.32437	0.000557227	11.378	185274	6.32943	0.00141513	11.1238	221503	6.32405	-0.00135364	10.4458	332521
6.33227	0.000540168	11.3864	185377	6.33733	0.00139488	11.1323	221975	6.33194	-0.00139595	10.4542	331709
6.34016	0.000523109	11.3948	185520	6.34522	0.00122359	11.1407	222402	6.33984	-0.00143827	10.4627	331137
6.34806	0.000465259	11.4032	185681	6.35312	0.00128514	11.1491	222576	6.34773	-0.0015668	10.4711	330503
6.35595	0.000351527	11.4117	185824	6.36101	0.00150865	11.1575	222497	6.35563	-0.00174255	10.4795	329790
6.36385	0.00045288	11.4201	185985	6.36891	0.00158687	11.1659	222370	6.36352	-0.00181078	10.4879	329228
6.37174	0.000468704	11.4285	186139	6.3768	0.00170635	11.1743	222346	6.37142	-0.00185843	10.4963	328690
6.37964	0.000452939	11.4369	186218	6.3847	0.00190186	11.1828	222288	6.37931	-0.00203486	10.5047	328096
6.38753	0.000437175	11.4453	186304	6.39259	0.00214942	11.1912	222233	6.38721	-0.00210372	10.5132	327459
6.39543	0.000520892	11.4537	186436	6.40049	0.00215919	11.1996	222276	6.3951	-0.00212073	10.5216	326755
6.40332	0.000526166	11.4622	186526	6.40838	0.00216895	11.208	222282	6.403	-0.00219086	10.53	326043
6.41122	0.000530411	11.4706	186498	6.41628	0.00214428	11.2164	222146	6.41089	-0.00208672	10.5384	325342
6.41911	0.000534657	11.479	186418	6.42417	0.0021552	11.2248	222027	6.41879	-0.00203873	10.5468	324640
6.42701	0.00052918	11.4874	186449	6.43207	0.00238224	11.2333	222028	6.42668	-0.00202369	10.5552	323950
6.4349	0.000523704	11.4958	186705	6.43996	0.00259153	11.2417	222002	6.43458	-0.00202514	10.5637	323259
6.4428	0.000422972	11.5043	186986	6.44786	0.00273575	11.2501	221919	6.44247	-0.00202658	10.5721	322464
6.45069	0.000391361	11.5127	187125	6.45575	0.00289616	11.2585	221901	6.45037	-0.00212124	10.5805	321545
6.45859	0.000343259	11.5211	187332	6.46365	0.0029237	11.2669	221987	6.45826	-0.00241856	10.5889	320687
6.46648	0.00024669	11.5295	187583	6.47154	0.00292949	11.2754	222101	6.46616	-0.00233873	10.5973	319984
6.47438	0.000146685	11.5379	187652	6.47944	0.00293528	11.2838	222098	6.47405	-0.00223513	10.6057	319306
6.48228	0.000160674	11.5463	187569	6.48733	0.00290844	11.2922	221959	6.48195	-0.00213152	10.6142	318518
6.49017	0.000110227	11.5548	187573	6.49523	0.00289025	11.3006	221864	6.48985	-0.00209273	10.6226	317615
6.49807	5.97805e-05	11.5632	187732	6.50312	0.00290359	11.309	221824	6.49774	-0.00196271	10.631	316803
6.50596	-5.71477e-05	11.5716	187997	6.51102	0.00290362	11.3174	221805	6.50564	-0.00196071	10.6394	315960
6.51386	-0.00022229	11.58	188161	6.51891	0.00290366	11.3259	221889	6.51353	-0.00195871	10.6478	315158
6.52175	-0.00022643	11.5884	188250	6.52681	0.00284153	11.3343	222161	6.52143	-0.00192544	10.6562	314516
6.52965	-0.000313213	11.5968	188389	6.5347	0.00278941	11.3427	222494	6.52932	-0.00194227	10.6647	313868
6.53754	-0.000399996	11.6053	188533	6.5426	0.00292806	11.3511	222533	6.53722	-0.0019591	10.6731	313155
6.54544	-0.000488421	11.6137	188612	6.55049	0.00296931	11.3595	222333	6.54511	-0.00203413	10.6815	312458
6.55333	-0.000608654	11.6221	188557	6.55839	0.00298912	11.3679	222168	6.55301	-0.00214933	10.6899	311691
6.56123	-0.000822804	11.6305	188378	6.56628	0.0029982	11.3764	221930	6.5609	-0.00218877	10.6983	310861
6.56912	-0.000792703	11.6389	188281	6.57418	0.00300728	11.3848	221660	6.5688	-0.00228231	10.7068	310120
6.57702	-0.000762602	11.6473	188463	6.58207	0.0029751	11.3932	221526	6.57669	-0.00238099	10.7152	309547
6.58491	-0.000752976	11.6558	188823	6.58997	0.00293017	11.4016	221560	6.58459	-0.00241119	10.7236	309016
6.59281	-0.000759215	11.6642	189214	6.59786	0.00294964	11.41	221714	6.59248	-0.0025598	10.732	308343
6.6007	-0.000765454	11.6726	189478	6.60576	0.0029496	11.4184	221834	6.60038	-0.00259357	10.7404	307621
6.6086	-0.00118234	11.681	189499	6.61365	0.00294956	11.4269	221738	6.60827	-0.00271597	10.7488	306857
6.61649	-0.00123587	11.6894	189475	6.62155	0.00310044	11.4353	221515	6.61617	-0.00262177	10.7573	305924
6.62439	-0.00119518	11.6979	189576	6.62944	0.00311451	11.4437	221381	6.62406	-0.00259598	10.7657	304827
6.63228	-0.00120535	11.7063	189723	6.63734	0.00312857	11.4521	221216	6.63196	-0.00263542	10.7741	303807
6.64018	-0.00121551	11.7147	189955	6.64523	0.00313715	11.4605	220986	6.63985	-0.00267486	10.7825	302994
6.64807	-0.00129337	11.7231	190181	6.65313	0.00300378	11.4689	220871	6.64775	-0.00266524	10.7909	302289
6.65597	-0.00135364	11.7315	190291	6.66102	0.00313241	11.4774	220971	6.65564	-0.00252711	10.7993	301524
6.66386	-0.0013445	11.7399	190327	6.66892	0.00315035	11.4858	221232	6.66354	-0.00253211	10.8078	300824
6.67176	-0.00136267	11.7484	190458	6.67682	0.00316829	11.4942	221250	6.67143	-0.00253711	10.8162	300211
6.67965	-0.00138083	11.7568	190741	6.68471	0.00327879	11.5026	221023	6.67933	-0.00256542	10.8246	299203
6.68755	-0.00140921	11.7652	191038	6.69261	0.00346925	11.511	220962	6.68722	-0.0026574	10.833	298075
6.69544	-0.00143758	11.7736	191198	6.7005	0.00355408	11.5195	220900	6.69512	-0.00269674	10.8414	297075
6.70334	-0.00152136	11.782	191376	6.7084	0.0035347	11.5279	220573	6.70301	-0.00273609	10.8498	296272
6.71123	-0.00154094	11.7904	192094	6.71629	0.00351531	11.5363	220237	6.71091	-0.00284489	10.8583	295440
6.71913	-0.00163528	11.7989	193364	6.72419	0.00345659	11.5447	220097	6.7188	-0.0028662	10.8667	294565
6.72702	-0.00163439	11.8073	194347	6.73208	0.00358622	11.5531	220098	6.7267	-0.00288751	10.8751	293831
6.73492	-0.00168779	11.8157	194396	6.73998	0.00369401	11.5615	220131	6.73459	-0.00293829	10.8835	293164
6.74281	-0.00171002	11.8241	193797	6.74787	0.00380181	11.57	220133	6.74249	-0.00305539	10.8919	292426
6.75071	-0.00169629	11.8325	191073	6.75577	0.00402192	11.5784	220228	6.75038	-0.00301332	10.9004	291624
6.7586	-0.00174197			6.76366	0.00433414	11.5868	220517	6.75828	-0.00307759	10.9088	290762
6.7665	-0.00178765			6.77156	0.00446965	11.5952	220730	6.76617	-0.00314185	10.9172	289855
6.77439	-0.00180291			6.77945	0.00453949	13.2029	116245	6.77407	-0.00330473	10.9256	288952
6.78229	-0.0018045			6.78735	0.00460934	13.2113	115663	6.78196	-0.00327987	10.934	288126
6.79018	-0.00200916			6.79524	0.00463455	13.2197	115140	6.78986	-0.00328876	10.9424	287321
6.79808	-0.00217503			6.80314	0.00465931	13.2282	114585	6.79775	-0.00329766	10.9509	286354
6.80597	-0.0022849			6.81103	0.00466528	13.2366	114128	6.80565	-0.00338779	10.9593	285401
6.81387	-0.00229069			6.81893	0.00467124	13.245	114051	6.81354	-0.00343759	10.9677	284674
6.82176	-0.00229649			6.82682	0.0049529	13.2534	114215	6.82144	-0.00335636	10.9761	284084
6.82966	-0.00255278			6.83472	0.0050446	13.2618	114344	6.82933	-0.00334039	10.9845	283188
6.83756	-0.00253557			6.84261	0.005075	13.2702	114495	6.83723	-0.00337056	10.9929	282273
6.84545	-0.00249089			6.85051	0.0051054	13.2787	114747	6.84513	-0.00340075	11.0014	281603
6.85335	-0.00240944			6.8584	0.00528749	13.2871	114955	6.85302	-0.00336331	11.0098	280972
6.86124	-0.00238588			6.8663	0.00532322	13.2955	114927	6.86092	-0.00332587	11.0182	279969
6.86914	-0.00237502			6.87419	0.00531872	13.3039	114666	6.86881	-0.00328511	11.0266	278874
6.87703	-0.00244453			6.88209	0.00531422	13.3123	114240	6.87671	-0.00331324	11.035	278055
6.88493	-0.00251403			6.88998	0.00535725	13.3207	113926	6.8846	-0.00334136	11.0434	277331
6.89282	-0.00251181			6.89788	0.00546608	13.3292	113929	6.8925	-0.00334038	11.0519	276525
6.90072	-0.00250959			6.90577	0.00557492	13.3376	113969	6.90039	-0.0033394	11.0603	275729
6.90861	-0.00250516			6.91367	0.00561723	13.346	113915	6.90829	-0.00345532	11.0687	274905
6.91651	-0.00270984			6.92156	0.00592703	13.3544	113884	6.91618	-0.00336067	11.0771	273952
6.9244	-0.00267078			6.92946	0.00611391	13.3628	113866	6.92408	-0.00334178	11.0855	273100
6.9323	-0.00267875			6.93735	0.00618301	13.3713	113910	6.93197	-0.00332289	11.0939	272229
6.94019	-0.00268672			6.94525	0.00625212	13.3797	113945	6.93987	-0.00325186	11.1024	271351
6.94809	-0.00272239			6.95314	0.00639006	13.3881	113778	6.94776	-0.00308805	11.1108	270714
6.95598	-0.00284761			6.96104	0.00646252	13.3965	113345	6.95566	-0.00292423	11.1192	270006
6.96388	-0.00274873			6.96893	0.00649184	13.4049	112894	6.96355	-0.00287064	11.1276	269027
6.97177	-0.00274764			6.97683	0.00652116	13.4133	112791	6.97145	-0.00279822	11.136	268159
6.97967	-0.00274654			6.98472	0.00654431	13.4218	113288	6.97934	-0.0027258	11.1445	267311
6.98756	-0.00273904			6.99262	0.00667702	13.4302	113895	6.98724	-0.00269722	11.1529	266511
6.99546	-0.00275512			7.00051	0.00699152	13.4386	113958	6.99513	-0.00266866	11.1613	265864
7.00335	-0.0027712			7.00841	0.00700851	13.447	113598	7.00303	-0.00265982	11.1697	265162
7.01125	-0.00281085			7.0163	0.0070255	13.4554	113180	7.01092	-0.00268832	11.1781	264205
7.01914	-0.00280371			7.0242	0.00721714	13.4638	113028	7.01882	-0.00271683	11.1865	263308
7.02704	-0.00280941			7.03209	0.00728729	13.4723	112804	7.02671	-0.00274396	11.195	262499
7.03493	-0.00281511			7.03999	0.00732161	13.4807	112431	7.03461	-0.0027711	11.2034	261457
7.04283	-0.00309796			7.04788	0.00734139	13.4891	111936	7.0425	-0.00270083	11.2118	260750
7.05072	-0.00307452			7.05578	0.00736116	13.4975	111451	7.0504	-0.00267366	11.2202	260180
7.05862	-0.0030183			7.06367	0.0074364	13.5059	111194	7.05829	-0.00271291	11.2286	259578
7.06651	-0.00299724			7.07157	0.00751164	13.5143	111098	7.06619	-0.00275215	11.237	258662
7.07441	-0.00297618			7.07946	0.0075994	13.5228	111094	7.07408	-0.00281087	11.2455	257598
7.0823	-0.00281477			7.08736	0.00764699	13.5312	111323	7.08198	-0.00278392	11.2539	256886
7.0902	-0.00280907			7.09525	0.00762181	13.5396	111692	7.08987	-0.00279123	11.2623	256313
7.09809	-0.00281067			7.10315	0.00759663	13.548	111940	7.09777	-0.00279854	11.2707	255855
7.10599	-0.00281227			7.11104	0.00773651	13.5564	112038	7.10566	-0.00267556	11.2791	255260
7.11388	-0.00291708			7.11894	0.0078	13.5648	112006	7.11356	-0.00257634	11.2875	254238
7.12178	-0.00282438			7.12684	0.00780486	13.5733	111792	7.12145	-0.00244804	11.296	252961
7.12967	-0.00278206			7.13473	0.00780973	13.5817	111397	7.12935	-0.00231092	11.3044	251940
7.13757	-0.00278647			7.14263	0.00761064	13.5901	111075	7.13724	-0.00232239	11.3128	251221
7.14546	-0.00279088			7.15052	0.00767469	13.5985	111387	7.14514	-0.00233387	11.3212	250685
7.15336	-0.00280712			7.15842	0.00769944	13.6069	112154	7.15303	-0.00238807	11.3296	250341
7.16125	-0.00261379			7.16631	0.00772419	13.6154	112689	7.16093	-0.00235906	11.338	249940
7.16915	-0.00257698			7.17421	0.0079109	13.6238	112925	7.16882	-0.00227585	11.3465	249336
7.17704	-0.00254016			7.1821	0.00793895	13.6322	112834	7.17672	-0.00227737	11.3549	248824
7.18494	-0.00254662			7.19	0.0080033	13.6406	112567	7.18462	-0.00227889	11.3633	248407
7.19284	-0.00255309			7.19789	0.00804215	13.649	112612	7.19251	-0.00243882	11.3717	247299
7.20073	-0.00259396			7.20579	0.008081	13.6574	113284	7.20041	-0.00229344	11.3801	245968
7.20863	-0.00258055			7.21368	0.00809916	13.6659	114061	7.2083	-0.00204355	11.3886	244909
7.21652	-0.00252829			7.22158	0.00815593	13.6743	114451	7.2162	-0.00203738	11.397	243760
7.22442	-0.00247603			7.22947	0.00815871	13.6827	114425	7.22409	-0.0020964	11.4054	242897
7.23231	-0.0024294			7.23737	0.00816148	13.6911	114240	7.23199	-0.00215543	11.4138	242205
7.24021	-0.00238874			7.24526	0.00813533	13.6995	113953	7.23988	-0.00233172	11.4222	241557
7.2481	-0.00234373			7.25316	0.00788161	13.7079	113313	7.24778	-0.00215762	11.4306	240989
7.256	-0.00235237			7.26105	0.00800883	13.7164	112378	7.25567	-0.00207348	11.4391	240299
7.26389	-0.002361			7.26895	0.00807291	13.7248	111635	7.26357	-0.00198934	11.4475	239612
7.27179	-0.00236327			7.27684	0.00806994	13.7332	111213	7.27146	-0.00170487	11.4559	238970
7.27968	-0.00213733			7.28474	0.00806697	13.7416	110855	7.27936	-0.00171506	11.4643	238498
7.28758	-0.00207036			7.29263	0.00794867	13.75	110540	7.28725	-0.00172524	11.4727	237873
7.29547	-0.002036			7.30053	0.0078397	13.7584	110237	7.29515	-0.0017491	11.4811	237233
7.30337	-0.00205566			7.30842	0.00797876	13.7669	109997	7.30304	-0.00160797	11.4896	236886
7.31126	-0.00207532			7.31632	0.00796084	13.7753	109831	7.31094	-0.00159013	11.498	236500
7.31916	-0.0022076			7.32421	0.00794292	13.7837	109721	7.31883	-0.0015723	11.5064	236104
7.32705	-0.00228543			7.33211	0.00789078	13.7921	109878	7.32673	-0.00130926	11.5148	235467
7.33495	-0.00229047			7.34	0.00761216	13.8005	110815	7.33462	-0.00122903	11.5232	234768
7.34284	-0.00229551			7.3479	0.00751457	13.809	112185	7.34252	-0.00121419	11.5316	234397
7.35074	-0.0022634			7.35579	0.00750875	13.8174	113232	7.35041	-0.00119936	11.5401	233632
7.35863	-0.00209351			7.36369	0.00750575	13.8258	113823	7.35831	-0.00118119	11.5485	232358
7.36653	-0.00203144			7.37158	0.00750274	13.8342	113582	7.3662	-0.00102281	11.5569	231038
7.37442	-0.00202628			7.37948	0.00746836	13.8426	112499	7.3741	-0.000970929	11.5653	229843
7.38232	-0.00202111			7.38737	0.00760472	13.851	111362	7.38199	-0.000919048	11.5737	229183
7.39021	-0.00192769			7.39527	0.00765574	13.8595	110611	7.38989	-0.000880535	16.2032	23663
7.39811	-0.00187962			7.40316	0.00768829	13.8679	109969	7.39778	-0.000862427	16.2117	23094.7
7.406	-0.00183155			7.41106	0.00771159	13.8763	109609	7.40568	-0.000869471	16.2201	22780.9
7.4139	-0.0017128			7.41895	0.00766051	13.8847	109863	7.41357	-0.000876516	16.2285	22515.4
7.42179	-0.00166639			7.42685	0.00760943	13.8931	110531	7.42147	-0.000767234	16.2369	22335
7.42969	-0.0016686			7.43474	0.00753211	13.9015	111196	7.42936	-0.000745529	16.2453	22193.2
7.43758	-0.0016708			7.44264	0.00741736	13.91	111633	7.43726	-0.000723824	16.2537	21985.5
7.44548	-0.00160043			7.45053	0.00742137	13.9184	111580	7.44515	-0.000636301	16.2622	21752
7.45337	-0.00152268			7.45843	0.00742879	13.9268	110827	7.45305	-0.000562932	16.2706	21531.4
7.46127	-0.00148252			7.46632	0.00732001	13.9352	110045	7.46094	-0.00055619	16.279	21421.7
7.46916	-0.00144237			7.47422	0.00728935	13.9436	109580	7.46884	-0.00043393	16.2874	21369.4
7.47706	-0.00139814			7.48211	0.00709875	13.952	108943	7.47673	-0.000389613	16.2958	21228.9
7.48495	-0.00135392			7.49001	0.00697169	13.9605	108062	7.48463	-0.000370621	16.3042	21055.5
7.49285	-0.00126293			7.4979	0.00684463	13.9689	107059	7.49252	-0.00040758	16.3127	20907.1
7.50074	-0.00123016			7.5058	0.00658298	13.9773	106223	7.50042	-0.00044454	16.3211	20856.7
7.50864	-0.00128125			7.51369	0.00664886	13.9857	105591	7.50831	-0.000343397	16.3295	20889.7
7.51653	-0.00133234			7.52159	0.00669823	13.9941	105055	7.51621	-0.000298915	16.3379	20916
7.52443	-0.00125553			7.52948	0.00670789			7.5241	-0.000254433	16.3463	20928.8
7.53233	-0.00117873			7.53738	0.00671755			7.532	-0.000197973	16.3547	20918.6
7.54022	-0.00111784			7.54527	0.00647022			7.5399	-0.000177075	16.3632	20874.1
7.54812	-0.000952355			7.55317	0.00608271			7.54779	-0.000156176	16.3716	20824.8
7.55601	-0.000925662			7.56107	0.00607707			7.55569	-0.000100733	16.38	20817
7.56391	-0.000920806			7.56896	0.00607181			7.56358	-9.45746e-05	16.3884	20791.9
7.5718	-0.000915951			7.57686	0.00606654			7.57148	-0.000130369	16.3968	20681.6
7.5797	-0.000733271			7.58475	0.00588595			7.57937	-0.000166164	16.4053	20509.4
7.58759	-0.000604591			7.59265	0.00566562			7.58727	-4.58335e-05	16.4137	20323.3
7.59549	-0.000536495			7.60054	0.00554466			7.59516	0.00029705	16.4221	20148.8
7.60338	-0.000468399			7.60844	0.00550605			7.60306	0.000418037	16.4305	20028.2
7.61128	-0.000375634			7.61633	0.00546745			7.61095	0.000504773	16.4389	20017.3
7.61917	-0.000326024			7.62423	0.00522403			7.61885	0.000856789	16.4473	20041.2
7.62707	-0.000276413			7.63212	0.0051353			7.62674	0.00093362	16.4558	20025.1
7.63496	-0.000226451			7.64002	0.00491485			7.63464	0.00101045	16.4642	19998.7
7.64286	-0.000132809			7.64791	0.00478263			7.64253	0.00121628	16.4726	19984
7.65075	3.68919e-05			7.65581	0.00473424			7.65043	0.00130098	16.481	19984.8
7.65865	0.000127198			7.6637	0.00468586			7.65832	0.00138569	16.4894	20044.6
7.66654	0.000164326			7.6716	0.0045704			7.66622	0.00141362	16.4978	20190.3
7.67444	0.000185304			7.67949	0.00445903			7.67411	0.0015448	16.5063	20409.1
7.68233	0.000206281			7.68739	0.00432485			7.68201	0.00167598	16.5147	20633.1
7.69023	0.000228981			7.69528	0.00421071			7.6899	0.00168642	16.5231	20787.9
7.69812	0.000383388			7.70318	0.00415518			7.6978	0.00170888	16.5315	20884.9
7.70602	0.000451229			7.71107	0.00393788			7.70569	0.00172416	16.5399	20968.9
7.71391	0.00049144			7.71897	0.00368906			7.71359	0.00176305	16.5483	21231.2
7.72181	0.000531652			7.72686	0.00361511			7.72148	0.00181569	16.5568	21583
7.7297	0.000654726			7.73476	0.00342244			7.72938	0.00189987	16.5652	21746.1
7.7376	0.000706802			7.74265	0.00321298			7.73727	0.00192054	16.5736	21661.1
7.74549	0.000734354			7.75055	0.00316452			7.74517	0.00192892	16.582	21377.6
7.75339	0.000749644			7.75844	0.00309202			7.75306	0.00193108	16.5904	21103.6
7.76128	0.000764933			7.76634	0.00306351			7.76096	0.00193324	16.5988	20966.6
7.76918	0.000809836			7.77423	0.00288507			7.76885	0.00208143	16.6073	21014
7.77707	0.000821775			7.78213	0.00270662			7.77675	0.00213732	16.6157	21191.9
7.78497	0.000833714			7.79002	0.00238396			7.78464	0.00231178	16.6241	21397.3
7.79286	0.00085225			7.79792	0.00201658			7.79254	0.00240576	16.6325	21565.5
7.80076	0.00089842			7.80581	0.00167724			7.80043	0.00244647	16.6409	21658.8
7.80865	0.000919735			7.81371	0.001562			7.80833	0.00244643	16.6494	21618.2
7.81655	0.000860419			7.8216	0.00151051			7.81622	0.0024464	16.6578	21415.8
7.82444	0.000801104			7.8295	0.00145901			7.82412	0.00240564	16.6662	21126.3
7.83234	0.000715516			7.83739	0.00102607			7.83201	0.002389	16.6746	20853.4
7.84023	0.000774635			7.84529	0.000718784			7.83991	0.00237237	16.683	20663.1
7.84813	0.000791973			7.85318	0.000636949			7.8478	0.00223324	16.6914	20590.3
7.85602	0.000809311			7.86108	0.000593466			7.8557	0.00226746	16.6999	20569.7
7.86392	0.000822702			7.86897	0.000549982			7.86359	0.00236229	16.7083	20561
7.87181	0.00080629			7.87687	0.000311597			7.87149	0.00230405	16.7167	20604
7.87971	0.000789877			7.88476	0.00010122			7.87939	0.00224581	16.7251	20782.5
7.88761	0.000698378			7.89266	4.47887e-05			7.88728	0.00212232	16.7335	21101.4
7.8955	0.000645966			7.90055	2.99391e-05			7.89518	0.00198208	16.7419	21525.5
7.9034	0.000718493			7.90845	-0.000299957			7.90307	0.00221699	16.7504	22136.9
7.91129	0.000773096			7.91634	-0.000327216			7.91097	0.00220373	16.7588	22813.8
7.91919	0.000800305			7.92424	-0.000446954			7.91886	0.00219046	16.7672	23378
7.92708	0.000893645			7.93213	-0.000566692			7.92676	0.0021396	16.7756	23861.2
7.93498	0.000906314			7.94003	-0.000802997			7.93465	0.00201674	16.784	24363.8
7.94287	0.000880768			7.94792	-0.000924438			7.94255	0.00206933	16.7924	24813.1
7.95077	0.000855222			7.95582	-0.00104907			7.95044	0.00207162
7.95866	0.000734049			7.96371	-0.00113755			7.95834	0.00206778
7.96656	0.000749191			7.97161	-0.00120134			7.96623	0.00206394
7.97445	0.000703596			7.9795	-0.00122123			7.97413	0.00206131
7.98235	0.000658001			7.9874	-0.00134133			7.98202	0.00203297
7.99024	0.000556509			7.99529	-0.00157911			7.98992	0.00200464
7.99814	0.000608227			8.00319	-0.00182915			7.99781	0.00199239
8.00603	0.000625904			8.01109	-0.00188386			8.00571	0.00168974
8.01393	0.000628355			8.01898	-0.00203632			8.0136	0.00174814
8.02182	0.000630805			8.02688	-0.00221469			8.0215	0.00178835
8.02972	0.000631204			8.03477	-0.00236226			8.02939	0.00178486
8.03761	0.000631604			8.04267	-0.00250056			8.03729	0.00178136
8.04551	0.000608664			8.05056	-0.00251941			8.04518	0.00176573
8.0534	0.000667156			8.05846	-0.00253825			8.05308	0.00175773
8.0613	0.00073133			8.06635	-0.00285828			8.06097	0.00174973
8.06919	0.000754156			8.07425	-0.00300876			8.06887	0.00147614
8.07709	0.000776982			8.08214	-0.00325654			8.07676	0.00142403
8.08498	0.000811809			8.09004	-0.0031742			8.08466	0.00163216
8.09288	0.000826412			8.09793	-0.00315053			8.09255	0.00165487
8.10077	0.000841015			8.10583	-0.0032715			8.10045	0.0016659
8.10867	0.00101572			8.11372	-0.00339247			8.10834	0.00167693
8.11656	0.00106148			8.12162	-0.00328622			8.11624	0.00179824
8.12446	0.00108197			8.12951	-0.00310942			8.12413	0.00181232
8.13235	0.00110246			8.13741	-0.00312157			8.13203	0.00182641
8.14025	0.00113959			8.1453	-0.00313372			8.13992	0.00181744
8.14814	0.00117671			8.1532	-0.00317688			8.14782	0.00180848
8.15604	0.00131546			8.16109	-0.00327			8.15571	0.00175189
8.16393	0.00132507			8.16899	-0.00326911			8.16361	0.00162417
8.17183	0.00133467			8.17688	-0.00326823			8.1715	0.00159768
8.17972	0.00135691			8.18478	-0.00322647			8.1794	0.0015712
8.18762	0.00139963			8.19267	-0.00320251			8.18729	0.00148979
8.19551	0.00142104			8.20057	-0.00317855			8.19519	0.00162893
8.20341	0.00143178			8.20846	-0.00294292			8.20308	0.00160541
8.2113	0.00141575			8.21636	-0.00287426			8.21098	0.0015819
8.2192	0.00139971			8.22425	-0.00285373			8.21887	0.00152688
8.22709	0.0015148			8.23215	-0.00283321			8.22677	0.00157318
8.23499	0.00152619			8.24004	-0.00278563			8.23467	0.00163352
8.24289	0.00151202			8.24794	-0.00271784			8.24256	0.00166314
8.25078	0.00149783			8.25583	-0.00270047			8.25046	0.00159069
8.25868	0.00143556			8.26373	-0.00268138			8.25835	0.00151824
8.26657	0.00169174			8.27162	-0.00258124			8.26625	0.00148698
8.27447	0.00192384			8.27952	-0.00249594			8.27414	0.00145573
8.28236	0.0019599			8.28741	-0.00241063			8.28204	0.00151346
8.29026	0.00205039			8.29531	-0.00222343			8.28993	0.00159914
8.29815	0.00217786			8.3032	-0.00201269			8.29783	0.00163366
8.30605	0.00220724			8.3111	-0.00198321			8.30572	0.0016292
8.31394	0.00223661			8.31899	-0.00190352			8.31362	0.00162473
8.32184	0.00228896			8.32689	-0.00185056			8.32151	0.00159616
8.32973	0.00230085			8.33478	-0.00176326			8.32941	0.00156759
8.33763	0.00228253			8.34268	-0.00171022			8.3373	0.00136926
8.34552	0.00226421			8.35057	-0.00165718			8.3452	0.00138821
8.35342	0.00227481			8.35847	-0.00160654			8.35309	0.00139703
8.36131	0.00227682			8.36636	-0.00151111			8.36099	0.00138591
8.36921	0.00227882			8.37426	-0.00147899			8.36888	0.00137478
8.3771	0.00238183			8.38215	-0.00138144			8.37678	0.00144958
8.385	0.00242918			8.39005	-0.00128923			8.38467	0.00147976
8.39289	0.00247652			8.39794	-0.00116544			8.39257	0.00150994
8.40079	0.00251065			8.40584	-0.00104166			8.40046	0.00155478
8.40868	0.00248457			8.41373	-0.000899867			8.40836	0.00152481
8.41658	0.0024585			8.42163	-0.000841362			8.41625	0.00149484
8.42447	0.00250214			8.42952	-0.000810839			8.42415	0.0014299
8.43237	0.0025126			8.43742	-0.000780317			8.43204	0.00153325
8.44026	0.00252307			8.44532	-0.000702939			8.43994	0.00152588
8.44816	0.00256904			8.45321	-0.000528686			8.44783	0.00151851
8.45605	0.00276122			8.46111	-0.000382215			8.45573	0.00148729
8.46395	0.00282378			8.469	-0.00025705			8.46362	0.00152549
8.47184	0.00288633			8.4769	-0.000153415			8.47152	0.00152015
8.47974	0.002954			8.48479	-9.8456e-05			8.47941	0.0015148
8.48763	0.00299044			8.49269	-4.34975e-05			8.48731	0.00150963
8.49553	0.00300392			8.50058	-1.68763e-05			8.4952	0.00150445
8.50342	0.00301739			8.50848	4.28018e-05			8.5031	0.0014435
8.51132	0.00302149			8.51637	0.000160968			8.51099	0.00147663
8.51921	0.00302559			8.52427	0.000223696			8.51889	0.00157709
8.52711	0.00298568			8.53216	0.000286424			8.52678	0.00164416
8.535	0.00303856			8.54006	0.000485325			8.53468	0.00164638
8.5429	0.00309143			8.54795	0.000546078			8.54257	0.00162023
8.55079	0.00332885			8.55585	0.000568389			8.55047	0.00159409
8.55869	0.00332203			8.56374	0.000590701			8.55836	0.00153957
8.56658	0.00331521			8.57164	0.000723558			8.56626	0.00146695
8.57448	0.00329004			8.57953	0.000843973			8.57415	0.00145972
8.58238	0.00334118			8.58743	0.000893734			8.58205	0.00145249
8.59027	0.00333229			8.59532	0.000905338			8.58995	0.00137776
8.59817	0.0033234			8.60322	0.000916943			8.59784	0.00138228
8.60606	0.00330084			8.61111	0.000871804			8.60574	0.00140394
8.61396	0.00350293			8.61901	0.000940268			8.61363	0.00141242
8.62185	0.00354391			8.6269	0.00109216			8.62153	0.00140598
8.62975	0.0035641			8.6348	0.00115468			8.62942	0.00139955
8.63764	0.0035188			8.64269	0.00121721			8.63732	0.00144873
8.64554	0.0034735			8.65059	0.00140426			8.64521	0.00147031
8.65343	0.00346959			8.65848	0.00158829			8.65311	0.0014919
8.66133	0.00346568			8.66638	0.00161579			8.661	0.00170391
8.66922	0.00344032			8.67427	0.00163324			8.6689	0.0017125
8.67712	0.00342287			8.68217	0.00165068			8.67679	0.00173254
8.68501	0.00340541			8.69006	0.00172334			8.68469	0.00172473
8.69291	0.00338786			8.69796	0.00179262			8.69258	0.00171691
8.7008	0.00353937			8.70585	0.00183469			8.70048	0.00168615
8.7087	0.00369122			8.71375	0.00183169			8.70837	0.00164764
8.71659	0.00371167			8.72164	0.00182869			8.71627	0.00165876
8.72449	0.0037566			8.72954	0.00179923			8.72416	0.00166194
8.73238	0.00393708			8.73743	0.00176977			8.73206	0.00166116
8.74028	0.00404195			8.74533	0.00169019			8.73995	0.00166038
8.74817	0.00407634			8.75322	0.00170015			8.74785	0.00176692
8.75607	0.00416539			8.76112	0.00192009			8.75574	0.0018013
8.76396	0.00418776			8.76901	0.00203019			8.76364	0.00181621
8.77186	0.00420016			8.77691	0.00205143			8.77153	0.00183112
8.77975	0.00416022			8.7848	0.00206793			8.77943	0.00182895
8.78765	0.00412027			8.7927	0.00206511			8.78732	0.00182678
8.79554	0.00402798			8.80059	0.00206228			8.79522	0.00181456
8.80344	0.00403993			8.80849	0.00204012			8.80311	0.00178814
8.81133	0.00442553			8.81638	0.00200819			8.81101	0.0018254
8.81923	0.00460057			8.82428	0.00196752			8.8189	0.00183478
8.82712	0.00468538			8.83217	0.00195365			8.8268	0.0018399
8.83502	0.00467937			8.84007	0.0019868			8.83469	0.00184503
8.84291	0.00467337			8.84796	0.00221347			8.84259	0.00189824
8.85081	0.0046614			8.85586	0.00223727			8.85048	0.00189912
8.8587	0.00487303			8.86375	0.00224871			8.85838	0.00189999
8.8666	0.00494116			8.87165	0.00226015			8.86627	0.00184545
8.87449	0.0049473			8.87954	0.00223387			8.87417	0.0017909
8.88239	0.00495344			8.88744	0.00215493			8.88206	0.00188736
8.89028	0.00507796			8.89534	0.00209015			8.88996	0.00192385
8.89818	0.00519778			8.90323	0.00202536			8.89785	0.00203034
8.90607	0.00523954			8.91113	0.0020074			8.90575	0.00231169
8.91397	0.00530368			8.91902	0.00198945			8.91364	0.00241711
8.92186	0.00544802			8.92692	0.00180467			8.92154	0.00246922
8.92976	0.00553585			8.93481	0.00180594			8.92944	0.0024712
8.93766	0.00562367			8.94271	0.00180722			8.93733	0.00247319
8.94555	0.0057062			8.9506	0.00181254			8.94523	0.0024844
8.95345	0.00578141			8.9585	0.00181787			8.95312	0.00263148
8.96134	0.00585661			8.96639	0.00177662			8.96102	0.002837
8.96924	0.00594046			8.97429	0.0017104			8.96891	0.00288187
8.97713	0.00615317			8.98218	0.00161484			8.97681	0.00303614
8.98503	0.00630904			8.99008	0.00160554			8.9847	0.00319206
8.99292	0.00633812			8.99797	0.00159547			8.9926	0.00338636
9.00082	0.00638532			9.00587	0.0015854			9.00049	0.00344024
9.00871	0.00657246			9.01376	0.00154995			9.00839	0.00349412
9.01661	0.00662208			9.02166	0.00151449			9.01628	0.00355915
9.0245	0.00670822			9.02955	0.00134932			9.02418	0.00377501
9.0324	0.00685103			9.03745	0.00140637			9.03207	0.00384181
9.04029	0.00685802			9.04534	0.00138379			9.03997	0.00384398
9.04819	0.00683978			9.05324	0.00136122			9.04786	0.00384615
9.05608	0.00682154			9.06113	0.00129014			9.05576	0.00390603
9.06398	0.00699088			9.06903	0.00114714			9.06365	0.00397207
9.07187	0.00723172			9.07692	0.00103344			9.07155	0.00431329
9.07977	0.00745092			9.08482	0.000872374			9.07944	0.00432379
9.08766	0.00754185			9.09271	0.000875796			9.08734	0.0043343
9.09556	0.00763279			9.10061	0.000849484			9.09523	0.00458848
9.10345	0.00774674			9.1085	0.000805579			9.10313	0.00483314
9.11135	0.00781411			9.1164	0.000723702			9.11102	0.00496018
9.11924	0.0078773			9.12429	0.000572381			9.11892	0.00502683
9.12714	0.00808393			9.13219	0.000584123			9.12681	0.00505021
9.13503	0.00834048			9.14008	0.000595865			9.13471	0.00526541
9.14293	0.00859987			9.14798	0.000336864			9.1426	0.00538634
9.15082	0.00874236			9.15587	0.000156437			9.1505	0.00547238
9.15872	0.00901426			9.16377	2.18181e-05			9.15839	0.00562183
9.16661	0.00932243			9.17166	-9.44952e-05			9.16629	0.00588702
9.17451	0.00937669			9.17956	-0.000134609			9.17418	0.00605134
9.1824	0.00940982			9.18745	-0.000174723			9.18208	0.00627939
9.1903	0.00963696			9.19535	-0.000288472			9.18997	0.00644034
9.19819	0.009922			9.20324	-0.000541045			9.19787	0.00669761
9.20609	0.0102952			9.21114	-0.000720445			9.20576	0.00709428
9.21398	0.0104722			9.21903	-0.000782604			9.21366	0.00724153
9.22188	0.0105266			9.22693	-0.000768217			9.22155	0.0073643
9.22977	0.0107899			9.23482	-0.000753829			9.22945	0.007856
9.23767	0.011065			9.24272	-0.000801729			9.23734	0.00819887
9.24556	0.0114003			9.25061	-0.000939399			9.24524	0.00826048
9.25346	0.0116418			9.25851	-0.00100328			9.25313	0.00847284
9.26135	0.0117283			9.2664	-0.00106183			9.26103	0.00885918
9.26925	0.0117766			9.2743	-0.00112037			9.26892	0.00910785
9.27715	0.0118248			9.28219	-0.00118378			9.27682	0.00940077
9.28504	0.0120304			9.29009	-0.00116969			9.28472	0.00975483
9.29294	0.0121955			9.29798	-0.0011556			9.29261	0.0100589
9.30083	0.0122607			9.30588	-0.00143514			9.30051	0.0103351
9.30873	0.0125631			9.31377	-0.00144425			9.3084	0.010609
9.31662	0.0128683			9.32167	-0.00143795			9.3163	0.0109
9.32452	0.0132685			9.32957	-0.00143166			9.32419	0.0111137
9.33241	0.0133221			9.33746	-0.00168713			9.33209	0.0115636
9.34031	0.0135156			9.34536	-0.00167216			9.33998	0.0121381
9.3482	0.0137201			9.35325	-0.00167714			9.34788	0.0124505
9.3561	0.0138173			9.36115	-0.00166971			9.35577	0.0128662
9.36399	0.0141814			9.36904	-0.00166228			9.36367	0.0133946
9.37189	0.0144722			9.37694	-0.00177007			9.37156	0.0138522
9.37978	0.0147603			9.38483	-0.00185328			9.37946	0.0144169
9.38768	0.0149024			9.39273	-0.0019365			9.38735	0.0148947
9.39557	0.0150491			9.40062	-0.00210309			9.39525	0.0153009
9.40347	0.0152153			9.40852	-0.00201454			9.40314	0.0156035
9.41136	0.0153815			9.41641	-0.00198627			9.41104	0.0163449
9.41926	0.0156475			9.42431	-0.00202357			9.41893	0.017047
9.42715	0.0162411			9.4322	-0.00206086			9.42683	0.0174398
9.43505	0.0165565			9.4401	-0.00217274			9.43472	0.0181443
9.44294	0.0167522			9.44799	-0.00215696			9.44262	0.0186466
9.45084	0.0169144			9.45589	-0.00206316			9.45051	0.0191024
9.45873	0.0171967			9.46378	-0.00206609			9.45841	0.0197538
9.46663	0.0175776			9.47168	-0.00206902			9.4663	0.0206211
9.47452	0.0179586			9.47957	-0.00212091			9.4742	0.0212008
9.48242	0.0182133			9.48747	-0.00215908			9.48209	0.0219183
9.49031	0.0183646			9.49536	-0.00197971			9.48999	0.0227313
9.49821	0.018512			9.50326	-0.00187643			9.49788	0.0233978
9.5061	0.0187723			9.51115	-0.00176208			9.50578	0.0242913
9.514	0.0190103			9.51905	-0.00176246			9.51367	0.0251617
9.52189	0.0192718			9.52694	-0.00176285			9.52157	0.026177
9.52979	0.0193639			9.53484	-0.00178606			9.52946	0.0271025
9.53768	0.0195741			9.54273	-0.00180648			9.53736	0.0277922
9.54558	0.0197479			9.55063	-0.0018324			9.54525	0.0286673
9.55347	0.0199217			9.55852	-0.00184909			9.55315	0.0298256
9.56137	0.0200517			9.56642	-0.00193195			9.56104	0.0308661
9.56926	0.0203039			9.57431	-0.00201842			9.56894	0.031921
9.57716	0.0206604			9.58221	-0.00203783			9.57683	0.0330196
9.58505	0.0207403			9.5901	-0.00205723			9.58473	0.0341374
9.59295	0.0211172			9.598	-0.00211705			9.59262	0.0353355
9.60084	0.0212378			9.60589	-0.00214439			9.60052	0.0366086
9.60874	0.0213584			9.61379	-0.00206744			9.60841	0.0377401
9.61663	0.0215024			9.62168	-0.00199988			9.61631	0.0389753
9.62453	0.0219613			9.62958	-0.00197801			9.6242	0.0404325
9.63243	0.0220887			9.63747	-0.00195615			9.6321	0.0418616
9.64032	0.022154			9.64537	-0.00193394			9.64	0.0433236
9.64822	0.0222193			9.65326	-0.00193732			9.64789	0.0448827
9.65611	0.0225473			9.66116	-0.0019407			9.65579	0.0464806
9.66401	0.0226651			9.66905	-0.00173766			9.66368	0.0480502
9.6719	0.0227442			9.67695	-0.00166312			9.67158	0.0496654
9.6798	0.0227565			9.68484	-0.00169721			9.67947	0.0515581
9.68769	0.0228205			9.69274	-0.00173131			9.68737	0.0534474
9.69559	0.0229929			9.70063	-0.00184425			9.69526	0.055178
9.70348	0.0232334			9.70853	-0.00163818			9.70316	0.0570105
9.71138	0.0233442			9.71642	-0.00151862			9.71105	0.0589023
9.71927	0.0235117			9.72432	-0.00129178			9.71895	0.06071
9.72717	0.0236396			9.73221	-0.00116863			9.72684	0.0627146
9.73506	0.0237432			9.74011	-0.00114365			9.73474	0.0650368
9.74296	0.0239359			9.748	-0.00111007			9.74263	0.0672668
9.75085	0.0239835			9.7559	-0.000930278			9.75053	0.069336
9.75875	0.0240312			9.76379	-0.000870898			9.75842	0.0713827
9.76664	0.0240427			9.77169	-0.000811518			9.76632	0.0737505
9.77454	0.0240314			9.77959	-0.000713762			9.77421	0.0763847
9.78243	0.0240201			9.78748	-0.000642703			9.78211	0.0789946
9.79033	0.0238689			9.79538	-0.000571645			9.79	0.081766
9.79822	0.0238397			9.80327	-0.000333724			9.7979	0.0843397
9.80612	0.023942			9.81117	-0.000159744			9.80579	0.0868863
9.81401	0.0240406			9.81906	-9.87249e-05			9.81369	0.0896467
9.82191	0.0240886			9.82696	9.55525e-05			9.82158	0.0927005
9.8298	0.0240322			9.83485	0.000169873			9.82948	0.0955963
9.8377	0.0239759			9.84275	0.000413593			9.83737	0.0985307
9.84559	0.0239001			9.85064	0.000448304			9.84527	0.101594
9.85349	0.0239909			9.85854	0.000473324			9.85316	0.104708
9.86138	0.024071			9.86643	0.000486967			9.86106	0.107793
9.86928	0.0241137			9.87433	0.00050061			9.86895	0.111011
9.87717	0.0240735			9.88222	0.000829396			9.87685	0.114545
9.88507	0.0240333			9.89012	0.00111645			9.88474	0.117783
9.89296	0.0239231			9.89801	0.00115898			9.89264	0.121174
9.90086	0.0239026			9.90591	0.00138463			9.90053	0.124706
9.90875	0.023893			9.9138	0.00152341			9.90843	0.128268
9.91665	0.0238834			9.9217	0.0016204			9.91632	0.131985
9.92454	0.0237855			9.92959	0.00181901			9.92422	0.1356
9.93244	0.0236914			9.93749	0.00196078			9.93211	0.13939
9.94033	0.023546			9.94538	0.00226406			9.94001	0.14331
9.94823	0.0234381			9.95328	0.00256332			9.9479	0.147297
9.95612	0.0233878			9.96117	0.00292723			9.9558	0.151253
9.96402	0.0233374			9.96907	0.00330526			9.96369	0.155186
9.97191	0.0232141			9.97696	0.00344126			9.97159	0.159303
9.97981	0.0230517			9.98486	0.00355811			9.97949	0.163406
9.98771	0.0231766			9.99275	0.00377713			9.98738	0.167721
9.9956	0.0231599			10.0006	0.00405729			9.99528	0.172053
10.0035	0.0231432			10.0085	0.00431849			10.0032	0.176168
10.0114	0.0230805			10.0164	0.0046801			10.0111	0.180716
10.0193	0.0230481			10.0243	0.00500434			10.019	0.18548
10.0272	0.023003			10.0322	0.00551068			10.0269	0.189964
10.0351	0.0229291			10.0401	0.00580625			10.0348	0.19451
10.043	0.0227357			10.048	0.00607317			10.0426	0.198982
10.0509	0.022555			10.0559	0.00624532			10.0505	0.203673
10.0588	0.0224285			10.0638	0.00641946			10.0584	0.208519
10.0667	0.0223111			10.0717	0.00658576			10.0663	0.213309
10.0746	0.022231			10.0796	0.00697126			10.0742	0.21795
10.0824	0.0222647			10.0875	0.00723453			10.0821	0.22289
10.0903	0.0222627			10.0954	0.00756857			10.09	0.227902
10.0982	0.0222606			10.1033	0.00808623			10.0979	0.233015
10.1061	0.0221366			10.1112	0.00859434			10.1058	0.23783
10.114	0.0221507			10.1191	0.00878349			10.1137	0.242862
10.1219	0.0221405			10.127	0.00890597			10.1216	0.248099
10.1298	0.0221303			10.1349	0.00925868			10.1295	0.253406
10.1377	0.0221204			10.1428	0.00964053			10.1374	0.258657
10.1456	0.022152			10.1507	0.010037			10.1453	0.263642
10.1535	0.0221666			10.1585	0.0106217			10.1532	0.268566
10.1614	0.0221049			10.1664	0.0110282			10.1611	0.273949
10.1693	0.0220431			10.1743	0.0112651			10.169	0.279269
10.1772	0.0220669			10.1822	0.0116909			10.1769	0.2843
10.1851	0.0220958			10.1901	0.0122829			10.1848	0.289828
10.193	0.022198			10.198	0.0127039			10.1927	0.294877
10.2009	0.0221988			10.2059	0.0130569			10.2005	0.29995
10.2088	0.0221996			10.2138	0.0136491			10.2084	0.305307
10.2167	0.0221954			10.2217	0.0143552			10.2163	0.310698
10.2246	0.0220876			10.2296	0.0146932			10.2242	0.315926
10.2325	0.0222159			10.2375	0.0151941			10.2321	0.321227
10.2403	0.0223237			10.2454	0.0160255			10.24	0.326651
10.2482	0.0224311			10.2533	0.0165458			10.2479	0.331918
10.2561	0.022574			10.2612	0.0169635			10.2558	0.336982
10.264	0.0226426			10.2691	0.0175368			10.2637	0.342151
10.2719	0.0227111			10.277	0.0182373			10.2716	0.347442
10.2798	0.0229789			10.2849	0.0188461			10.2795	0.352567
10.2877	0.0232141			10.2928	0.0193051			10.2874	0.35764
10.2956	0.0232809			10.3007	0.0199655			10.2953	0.362814
10.3035	0.0234133			10.3086	0.0207422			10.3032	0.367923
10.3114	0.0235997			10.3165	0.0213481			10.3111	0.373051
10.3193	0.0237255			10.3243	0.0221462			10.319	0.378155
10.3272	0.0238906			10.3322	0.0229447			10.3269	0.383275
10.3351	0.024403			10.3401	0.0236082			10.3348	0.388346
10.343	0.0246326			10.348	0.0243398			10.3427	0.393025
10.3509	0.0250967			10.3559	0.0252791			10.3506	0.398022
10.3588	0.0253503			10.3638	0.026287			10.3585	0.402871
10.3667	0.0255569			10.3717	0.0274119			10.3663	0.407621
10.3746	0.0257308			10.3796	0.0285249			10.3742	0.412353
10.3825	0.0261566			10.3875	0.0294117			10.3821	0.417071
10.3904	0.0267062			10.3954	0.0303784			10.39	0.421738
10.3983	0.0272606			10.4033	0.0318266			10.3979	0.426326
10.4061	0.0277653			10.4112	0.033224			10.4058	0.430882
10.414	0.0282946			10.4191	0.03425			10.4137	0.435321
10.4219	0.0289565			10.427	0.0353878			10.4216	0.439636
10.4298	0.0294269			10.4349	0.0368962			10.4295	0.443828
10.4377	0.0299635			10.4428	0.0385903			10.4374	0.448101
10.4456	0.0306071			10.4507	0.0402775			10.4453	0.452483
10.4535	0.0313375			10.4586	0.0418775			10.4532	0.456595
10.4614	0.0320403			10.4665	0.0435694			10.4611	0.460398
10.4693	0.0329015			10.4744	0.0455842			10.469	0.464121
10.4772	0.0336684			10.4822	0.0476657			10.4769	0.468126
10.4851	0.0344356			10.4901	0.0495419			10.4848	0.471861
10.493	0.0354724			10.498	0.0515901			10.4927	0.475293
10.5009	0.0365024			10.5059	0.0540152			10.5006	0.478653
10.5088	0.0376087			10.5138	0.0565073			10.5085	0.482002
10.5167	0.0387621			10.5217	0.0588735			10.5164	0.485379
10.5246	0.0399286			10.5296	0.0617967			10.5242	0.488643
10.5325	0.0412239			10.5375	0.0647148			10.5321	0.491753
10.5404	0.0427802			10.5454	0.0677359			10.54	0.494851
10.5483	0.044066			10.5533	0.0706508			10.5479	0.497782
10.5562	0.0456282			10.5612	0.0738665			10.5558	0.500537
10.564	0.0471289			10.5691	0.0774663			10.5637	0.50313
10.5719	0.0487184			10.577	0.0810534			10.5716	0.50572
10.5798	0.0507653			10.5849	0.0848928			10.5795	0.508378
10.5877	0.0524871			10.5928	0.0888803			10.5874	0.510898
10.5956	0.0544293			10.6007	0.0929854			10.5953	0.513182
10.6035	0.0566673			10.6086	0.09742			10.6032	0.515346
10.6114	0.0590238			10.6165	0.101988			10.6111	0.517335
10.6193	0.0613273			10.6244	0.106687			10.619	0.519553
10.6272	0.0640472			10.6323	0.111708			10.6269	0.521429
10.6351	0.0669032			10.6401	0.116872			10.6348	0.523119
10.643	0.0694234			10.648	0.122336			10.6427	0.524973
10.6509	0.0721591			10.6559	0.127943			10.6506	0.526587
10.6588	0.0753161			10.6638	0.133752			10.6585	0.527905
10.6667	0.0786815			10.6717	0.139806			10.6664	0.529224
10.6746	0.0822332			10.6796	0.146086			10.6743	0.530449
10.6825	0.085985			10.6875	0.152719			10.6822	0.531496
10.6904	0.0897505			10.6954	0.159474			10.69	0.53257
10.6983	0.093746			10.7033	0.16621			10.6979	0.533595
10.7062	0.0981286			10.7112	0.17349			10.7058	0.534477
10.7141	0.102315			10.7191	0.180839			10.7137	0.53519
10.722	0.106965			10.727	0.188454			10.7216	0.535758
10.7298	0.111939			10.7349	0.196249			10.7295	0.536427
10.7377	0.117081			10.7428	0.204134			10.7374	0.536937
10.7456	0.122196			10.7507	0.212262			10.7453	0.537268
10.7535	0.127585			10.7586	0.220695			10.7532	0.537423
10.7614	0.133642			10.7665	0.229247			10.7611	0.537461
10.7693	0.139724			10.7744	0.237677			10.769	0.537458
10.7772	0.145921			10.7823	0.246292			10.7769	0.537454
10.7851	0.152393			10.7902	0.255305			10.7848	0.53736
10.793	0.159421			10.7981	0.264537			10.7927	0.537068
10.8009	0.166436			10.8059	0.273632			10.8006	0.536804
10.8088	0.173731			10.8138	0.282958			10.8085	0.536374
10.8167	0.181256			10.8217	0.29206			10.8164	0.53572
10.8246	0.18921			10.8296	0.301298			10.8243	0.535208
10.8325	0.197596			10.8375	0.310422			10.8322	0.534592
10.8404	0.205947			10.8454	0.319833			10.8401	0.533907
10.8483	0.214624			10.8533	0.329211			10.8479	0.532865
10.8562	0.224015			10.8612	0.338361			10.8558	0.531763
10.8641	0.233333			10.8691	0.347817			10.8637	0.530626
10.872	0.243027			10.877	0.35696			10.8716	0.529504
10.8799	0.252786			10.8849	0.366322			10.8795	0.528239
10.8877	0.263013			10.8928	0.37545			10.8874	0.526986
10.8956	0.27352			10.9007	0.384188			10.8953	0.525726
10.9035	0.284384			10.9086	0.39329			10.9032	0.524383
10.9114	0.295477			10.9165	0.402383			10.9111	0.522785
10.9193	0.307087			10.9244	0.41116			10.919	0.521036
10.9272	0.318575			10.9323	0.419574			10.9269	0.519153
10.9351	0.330287			10.9402	0.428004			10.9348	0.517232
10.943	0.342792			10.9481	0.436377			10.9427	0.515369
10.9509	0.355634			10.956	0.444197			10.9506	0.513559
10.9588	0.368013			10.9638	0.451912			10.9585	0.511614
10.9667	0.380618			10.9717	0.459581			10.9664	0.509466
10.9746	0.394045			10.9796	0.467128			10.9743	0.507
10.9825	0.407538			10.9875	0.474384			10.9822	0.504964
10.9904	0.421315			10.9954	0.481364			10.9901	0.502795
10.9983	0.434866			11.0033	0.487924			10.998	0.50034
11.0062	0.448835			11.0112	0.494203			11.0058	0.497599
11.0141	0.46337			11.0191	0.500409			11.0137	0.495122
11.022	0.47781			11.027	0.506646			11.0216	0.492707
11.0299	0.492164			11.0349	0.512127			11.0295	0.489986
11.0378	0.506857			11.0428	0.517084			11.0374	0.487104
11.0457	0.521461			11.0507	0.522047			11.0453	0.484328
11.0535	0.536278			11.0586	0.526683			11.0532	0.481504
11.0614	0.551152			11.0665	0.531063			11.0611	0.478646
11.0693	0.566225			11.0744	0.534972			11.069	0.47585
11.0772	0.58116			11.0823	0.538983			11.0769	0.473022
11.0851	0.596126			11.0902	0.542672			11.0848	0.469998
11.093	0.611441			11.0981	0.545642			11.0927	0.466897
11.1009	0.626449			11.106	0.548426			11.1006	0.463788
11.1088	0.641333			11.1139	0.550901			11.1085	0.46051
11.1167	0.655862			11.1218	0.552978			11.1164	0.457108
11.1246	0.669945			11.1296	0.554811			11.1243	0.454114
11.1325	0.684367			11.1375	0.556329			11.1322	0.450698
11.1404	0.698941			11.1454	0.557435			11.1401	0.447085
11.1483	0.71306			11.1533	0.558287			11.148	0.443727
11.1562	0.727583			11.1612	0.559053			11.1559	0.440161
11.1641	0.741928			11.1691	0.558988			11.1638	0.436462
11.172	0.755975			11.177	0.558923			11.1716	0.432716
11.1799	0.769569			11.1849	0.558753			11.1795	0.429217
11.1878	0.783144			11.1928	0.558413			11.1874	0.425657
11.1957	0.796566			11.2007	0.557496			11.1953	0.42187
11.2036	0.809388			11.2086	0.556454			11.2032	0.418266
11.2114	0.822227			11.2165	0.555293			11.2111	0.414408
11.2193	0.83485			11.2244	0.553334			11.219	0.410616
11.2272	0.847152			11.2323	0.551351			11.2269	0.406742
11.2351	0.859138			11.2402	0.549321			11.2348	0.402884
11.243	0.870309			11.2481	0.546962			11.2427	0.399097
11.2509	0.881352			11.256	0.544407			11.2506	0.395176
11.2588	0.891727			11.2639	0.541515			11.2585	0.391284
11.2667	0.901686			11.2718	0.53828			11.2664	0.387356
11.2746	0.911397			11.2797	0.534754			11.2743	0.383416
11.2825	0.920614			11.2875	0.53089			11.2822	0.379481
11.2904	0.929647			11.2954	0.527162			11.2901	0.375571
11.2983	0.938048			11.3033	0.523109			11.298	0.371819
11.3062	0.945799			11.3112	0.518772			11.3059	0.367656
11.3141	0.953255			11.3191	0.514408			11.3138	0.363358
11.322	0.960213			11.327	0.50984			11.3217	0.359304
11.3299	0.966542			11.3349	0.505199			11.3295	0.355172
11.3378	0.972253			11.3428	0.500459			11.3374	0.35094
11.3457	0.977688			11.3507	0.495275			11.3453	0.346822
11.3536	0.98252			11.3586	0.490157			11.3532	0.342854
11.3615	0.986528			11.3665	0.484821			11.3611	0.338594
11.3693	0.990079			11.3744	0.479371			11.369	0.334273
11.3772	0.993149			11.3823	0.473661			11.3769	0.32995
11.3851	0.995749			11.3902	0.468027			11.3848	0.32553
11.393	0.99775			11.3981	0.4622			11.3927	0.321365
11.4009	0.999399			11.406	0.456432			11.4006	0.317469
11.4088	0.999835			11.4139	0.450642			11.4085	0.313138
11.4167	1			11.4218	0.444675			11.4164	0.30906
11.4246	0.999815			11.4297	0.438491			11.4243	0.304918
11.4325	0.999629			11.4376	0.432451			11.4322	0.300686
11.4404	0.998227			11.4454	0.42628			11.4401	0.296345
11.4483	0.996187			11.4533	0.419833			11.448	0.291974
11.4562	0.994009			11.4612	0.413503			11.4559	0.287816
11.4641	0.990826			11.4691	0.407029			11.4638	0.283525
11.472	0.987473			11.477	0.400553			11.4717	0.279293
11.4799	0.98349			11.4849	0.394191			11.4796	0.275254
11.4878	0.979003			11.4928	0.387857			11.4875	0.271136
11.4957	0.974208			11.5007	0.381574			11.4953	0.267097
11.5036	0.968963			11.5086	0.375007			11.5032	0.262969
11.5115	0.963128			11.5165	0.368429			11.5111	0.258825
11.5194	0.956709			11.5244	0.361874			11.519	0.255099
11.5273	0.949968			11.5323	0.355398			11.5269	0.251126
11.5351	0.942609			11.5402	0.349097			11.5348	0.246874
11.543	0.935282			11.5481	0.34255			11.5427	0.242894
11.5509	0.927352			11.556	0.336371			11.5506	0.238881
11.5588	0.91892			11.5639	0.329842			11.5585	0.2349
11.5667	0.910123			11.5718	0.323394			11.5664	0.231065
11.5746	0.900801			11.5797	0.317405			11.5743	0.227141
11.5825	0.891444			11.5876	0.311066			11.5822	0.22325
11.5904	0.881368			11.5955	0.305006			11.5901	0.219417
11.5983	0.871315			11.6034	0.299257			11.598	0.215734
11.6062	0.861028			11.6112	0.293024			11.6059	0.211938
11.6141	0.850655			11.6191	0.286759			11.6138	0.208409
11.622	0.839904			11.627	0.280866			11.6217	0.204801
11.6299	0.828663			11.6349	0.275134			11.6296	0.200981
11.6378	0.817515			11.6428	0.269451			11.6375	0.197377
11.6457	0.806012			11.6507	0.263773			11.6454	0.194006
11.6536	0.794227			11.6586	0.257969			11.6532	0.190514
11.6615	0.782674			11.6665	0.25218			11.6611	0.186971
11.6694	0.77066			11.6744	0.247067			11.669	0.183404
11.6773	0.758202			11.6823	0.241603			11.6769	0.180189
11.6852	0.745828			11.6902	0.235854			11.6848	0.176871
11.693	0.733312			11.6981	0.230553			11.6927	0.173426
11.7009	0.720833			11.706	0.225356			11.7006	0.170241
11.7088	0.708024			11.7139	0.22039			11.7085	0.167151
11.7167	0.69523			11.7218	0.215388			11.7164	0.163933
11.7246	0.682926			11.7297	0.210513			11.7243	0.160966
11.7325	0.670877			11.7376	0.205912			11.7322	0.157956
11.7404	0.658287			11.7455	0.201068			11.7401	0.154825
11.7483	0.64516			11.7534	0.196421			11.748	0.151637
11.7562	0.632132			11.7613	0.191932			11.7559	0.148612
11.7641	0.619207			11.7691	0.187315			11.7638	0.146145
11.772	0.605976			11.777	0.183002			11.7717	0.143406
11.7799	0.593681			11.7849	0.178742			11.7796	0.140578
11.7878	0.581382			11.7928	0.174578			11.7875	0.137917
11.7957	0.568541			11.8007	0.170541			11.7954	0.135378
11.8036	0.556034			11.8086	0.166339			11.8033	0.132762
11.8115	0.543495			11.8165	0.162466			11.8112	0.13021
11.8194	0.531196			11.8244	0.158694			11.819	0.1278
11.8273	0.518771			11.8323	0.154967			11.8269	0.125388
11.8352	0.50657			11.8402	0.151333			11.8348	0.123071
11.8431	0.494354			11.8481	0.147543			11.8427	0.120566
11.851	0.481902			11.856	0.14403			11.8506	0.11822
11.8588	0.470351			11.8639	0.140551			11.8585	0.116157
11.8667	0.45858			11.8718	0.13724			11.8664	0.114029
11.8746	0.446511			11.8797	0.134061			11.8743	0.111853
11.8825	0.434609			11.8876	0.130803			11.8822	0.109797
11.8904	0.423582			11.8955	0.127742			11.8901	0.107597
11.8983	0.412549			11.9034	0.124879			11.898	0.105575
11.9062	0.401461			11.9113	0.121762			11.9059	0.103711
11.9141	0.390539			11.9192	0.11882			11.9138	0.101834
11.922	0.38027			11.927	0.116164			11.9217	0.0997895
11.9299	0.369713			11.9349	0.113449			11.9296	0.0981289
11.9378	0.359104			11.9428	0.11082			11.9375	0.0967241
11.9457	0.349012			11.9507	0.108097			11.9454	0.0950267
11.9536	0.339117			11.9586	0.10571			11.9533	0.0933414
11.9615	0.329551			11.9665	0.103602			11.9612	0.091809
11.9694	0.320113			11.9744	0.101343			11.9691	0.0900969
11.9773	0.311042			11.9823	0.0988884			11.9769	0.088508
11.9852	0.302008			11.9902	0.0968275			11.9848	0.0869243
11.9931	0.292931			11.9981	0.0951518			11.9927	0.085497
12.001	0.284366			12.006	0.0931182			12.0006	0.0840205
12.0089	0.2758			12.0139	0.0909547			12.0085	0.0827528
12.0167	0.267405			12.0218	0.0889167			12.0164	0.0815241
12.0246	0.259396			12.0297	0.0871982			12.0243	0.0799809
12.0325	0.251151			12.0376	0.0853145			12.0322	0.0785261
12.0404	0.243597			12.0455	0.0834433			12.0401	0.0776075
12.0483	0.236165			12.0534	0.0818325			12.048	0.0764727
12.0562	0.228391			12.0613	0.0800066			12.0559	0.0751004
12.0641	0.221216			12.0692	0.0783331			12.0638	0.0740372
12.072	0.213919			12.0771	0.0769941			12.0717	0.0730975
12.0799	0.207224			12.085	0.07551			12.0796	0.0720109
12.0878	0.20055			12.0928	0.0740125			12.0875	0.0710627
12.0957	0.193835			12.1007	0.0726497			12.0954	0.0700253
12.1036	0.187477			12.1086	0.07122			12.1033	0.0689474
12.1115	0.181476			12.1165	0.0698126			12.1112	0.0678816
12.1194	0.175578			12.1244	0.0685362			12.1191	0.0670324
12.1273	0.170008			12.1323	0.0675353			12.127	0.0665499
12.1352	0.164446			12.1402	0.0663003			12.1349	0.0657242
12.1431	0.158907			12.1481	0.064981			12.1427	0.0647436
12.151	0.153614			12.156	0.0642925			12.1506	0.0640092
12.1589	0.148349			12.1639	0.0633989			12.1585	0.0632424
12.1668	0.14356			12.1718	0.0623308			12.1664	0.0625578
12.1747	0.139015			12.1797	0.0615468			12.1743	0.0619195
12.1825	0.134378			12.1876	0.0604427			12.1822	0.0612172
12.1904	0.129707			12.1955	0.0594829			12.1901	0.0605967
12.1983	0.125211			12.2034	0.0590338			12.198	0.0599326
12.2062	0.121			12.2113	0.058264			12.2059	0.0595139
12.2141	0.116986			12.2192	0.0573965			12.2138	0.0590549
12.222	0.112886			12.2271	0.0564845			12.2217	0.0584879
12.2299	0.109271			12.235	0.0556482			12.2296	0.0579245
12.2378	0.105648			12.2429	0.0551101			12.2375	0.0573164
12.2457	0.102			12.2507	0.0544604			12.2454	0.0567618
12.2536	0.0986018			12.2586	0.0536837			12.2533	0.0562565
12.2615	0.0954132			12.2665	0.0530929			12.2612	0.0557898
12.2694	0.091999			12.2744	0.0526207			12.2691	0.0553939
12.2773	0.0888209			12.2823	0.0520299			12.277	0.0548797
12.2852	0.085937			12.2902	0.0516653			12.2849	0.0542151
12.2931	0.0828612			12.2981	0.0511278			12.2928	0.0538403
12.301	0.0800227			12.306	0.0505536			12.3006	0.0534525
12.3089	0.0773433			12.3139	0.0500627			12.3085	0.0528963
12.3168	0.0747484			12.3218	0.0498838			12.3164	0.0523996
12.3247	0.0722875			12.3297	0.0495324			12.3243	0.0521604
12.3326	0.0697471			12.3376	0.0488681			12.3322	0.0517858
12.3404	0.0675146			12.3455	0.0485334			12.3401	0.0512566
12.3483	0.06551			12.3534	0.0481764			12.348	0.0510758
12.3562	0.0632292			12.3613	0.0475232			12.3559	0.050799
12.3641	0.0612248			12.3692	0.0472143			12.3638	0.0505087
12.372	0.0594019			12.3771	0.0471447			12.3717	0.0501376
12.3799	0.0575257			12.385	0.0469789			12.3796	0.0498935
12.3878	0.0556672			12.3929	0.04663			12.3875	0.0496195
12.3957	0.0540447			12.4008	0.0461587			12.3954	0.0491646
12.4036	0.052304			12.4086	0.0458498			12.4033	0.0489512
12.4115	0.0506257			12.4165	0.0456917			12.4112	0.0487083
12.4194	0.0490214			12.4244	0.0456976			12.4191	0.0481911
12.4273	0.0473137			12.4323	0.0454007			12.427	0.0478997
12.4352	0.0456285			12.4402	0.0450161			12.4349	0.0477868
12.4431	0.0442257			12.4481	0.0448797			12.4428	0.0476739
12.451	0.0429963			12.456	0.0447041			12.4507	0.0473808
12.4589	0.0416949			12.4639	0.0443819			12.4586	0.0472475
12.4668	0.0404208			12.4718	0.0442029			12.4664	0.0468325
12.4747	0.0392218			12.4797	0.0441207			12.4743	0.0466263
12.4826	0.0380751			12.4876	0.044119			12.4822	0.046422
12.4905	0.0368064			12.4955	0.0441193			12.4901	0.0461952
12.4984	0.0357506			12.5034	0.0441195			12.498	0.0458976
12.5062	0.0349209			12.5113	0.0441198			12.5059	0.045682
12.5141	0.0338788			12.5192	0.0440736			12.5138	0.0455939
12.522	0.0328112			12.5271	0.0440382			12.5217	0.0452842
12.5299	0.031838			12.535	0.0440027			12.5296	0.0450644
12.5378	0.0309369			12.5429	0.0439101			12.5375	0.0449505
12.5457	0.0301797			12.5508	0.0438677			12.5454	0.0447338
12.5536	0.0292164			12.5587	0.043883			12.5533	0.0446036
12.5615	0.0282001			12.5666	0.0438983			12.5612	0.0445197
12.5694	0.0273408			12.5744	0.043731			12.5691	0.0444601
12.5773	0.0267315			12.5823	0.043735			12.577	0.0443356
12.5852	0.0261596			12.5902	0.043739			12.5849	0.0439763
12.5931	0.0252543			12.5981	0.0437556			12.5928	0.043808
12.601	0.0246135			12.606	0.0438256			12.6007	0.0437973
12.6089	0.0240417			12.6139	0.0440323			12.6086	0.0437866
12.6168	0.0232823			12.6218	0.0441046			12.6165	0.0436826
12.6247	0.0225982			12.6297	0.0441902			12.6243	0.0434155
12.6326	0.0219355			12.6376	0.0442758			12.6322	0.0433393
12.6405	0.021288			12.6455	0.0443544			12.6401	0.0430812
12.6484	0.0207557			12.6534	0.0443726			12.648	0.0429601
12.6563	0.0200741			12.6613	0.0443908			12.6559	0.0428662
12.6641	0.0195825			12.6692	0.0444143			12.6638	0.0426552
12.672	0.019258			12.6771	0.0444313			12.6717	0.0425272
12.6799	0.0188104			12.685	0.0445959			12.6796	0.0425555
12.6878	0.0186416			12.6929	0.0446798			12.6875	0.042539
12.6957	0.0181839			12.7008	0.0447637			12.6954	0.0425224
12.7036	0.0174992			12.7087	0.0447895			12.7033	0.0425387
12.7115	0.01698			12.7166	0.0450708			12.7112	0.0425201
12.7194	0.0165812			12.7245	0.0453711			12.7191	0.0425016
12.7273	0.0163481			12.7323	0.0456403			12.727	0.0422364
12.7352	0.0161429			12.7402	0.0457943			12.7349	0.0419236
12.7431	0.0159463			12.7481	0.0458619			12.7428	0.0418522
12.751	0.0157379			12.756	0.0459296			12.7507	0.0417808
12.7589	0.0153446			12.7639	0.0462594			12.7586	0.0416175
12.7668	0.0150642			12.7718	0.0468891			12.7665	0.0417506
12.7747	0.0147603			12.7797	0.0472685			12.7744	0.0417594
12.7826	0.0145722			12.7876	0.0473435			12.7823	0.0417475
12.7905	0.0144825			12.7955	0.0474407			12.7901	0.0417356
12.7984	0.014195			12.8034	0.0476856			12.798	0.0416866
12.8063	0.0138982			12.8113	0.0478908			12.8059	0.0414547
12.8142	0.0135033			12.8192	0.0481709			12.8138	0.0414485
12.8221	0.0132341			12.8271	0.0484851			12.8217	0.0414386
12.8299	0.0129565			12.835	0.0486812			12.8296	0.0413988
12.8378	0.0126169			12.8429	0.0489337			12.8375	0.041223
12.8457	0.0124732			12.8508	0.0493734			12.8454	0.0410575
12.8536	0.0122977			12.8587	0.0496205			12.8533	0.0410584
12.8615	0.0119768			12.8666	0.0498859			12.8612	0.0410592
12.8694	0.0118022			12.8745	0.0502376			12.8691	0.0410138
12.8773	0.011786			12.8824	0.0507374			12.877	0.0409894
12.8852	0.0117697			12.8903	0.0510851			12.8849	0.0409651
12.8931	0.0116928			12.8981	0.0512504			12.8928	0.0408018
12.901	0.0113993			12.906	0.0515691			12.9007	0.0409465
12.9089	0.0111484			12.9139	0.0520222			12.9086	0.0409514
12.9168	0.0110931			12.9218	0.0522798			12.9165	0.0409422
12.9247	0.0109728			12.9297	0.0526089			12.9244	0.040933
12.9326	0.0106518			12.9376	0.0529858			12.9323	0.0408133
12.9405	0.0103418			12.9455	0.0533124			12.9402	0.0407883
12.9484	0.0102996			12.9534	0.0537084			12.948	0.0409955
12.9563	0.0102574			12.9613	0.0542142			12.9559	0.0410025
12.9642	0.0101678			12.9692	0.0546145			12.9638	0.0409754
12.9721	0.0100688			12.9771	0.0548737			12.9717	0.0409483
12.98	0.0100085			12.985	0.0553846			12.9796	0.0409131
12.9878	0.00994582			12.9929	0.0558629			12.9875	0.0409468
12.9957	0.00984181			13.0008	0.0560919			12.9954	0.0409311
13.0036	0.00939635			13.0087	0.0563402			13.0033	0.0409155
13.0115	0.00917448			13.0166	0.0569195			13.0112	0.0409894
13.0194	0.00932896			13.0245	0.0573737			13.0191	0.0410179
13.0273	0.00935404			13.0324	0.0577535			13.027	0.0411775
13.0352	0.00934307			13.0403	0.0581903			13.0349	0.0412417
13.0431	0.00933211			13.0482	0.0586842			13.0428	0.041306
13.051	0.00928513			13.056	0.0591043			13.0507	0.0414008
13.0589	0.00916946			13.0639	0.0595079			13.0586	0.0415247
13.0668	0.00899535			13.0718	0.0603015			13.0665	0.0415798
13.0747	0.00891682			13.0797	0.0607682			13.0744	0.0416572
13.0826	0.0087993			13.0876	0.061244			13.0823	0.0416747
13.0905	0.00878393			13.0955	0.0615804			13.0902	0.0416728
13.0984	0.00876856			13.1034	0.061868			13.0981	0.041671
13.1063	0.00871196			13.1113	0.0624258			13.1059	0.0419214
13.1142	0.0086777			13.1192	0.0630319			13.1138	0.0419388
13.1221	0.00864344			13.1271	0.0638118			13.1217	0.0419563
13.13	0.00856644			13.135	0.0643202			13.1296	0.0420245
13.1379	0.00845866			13.1429	0.0647957			13.1375	0.0420991
13.1458	0.00834737			13.1508	0.0651835			13.1454	0.0421737
13.1536	0.00830499			13.1587	0.0653703			13.1533	0.0423034
13.1615	0.00826262			13.1666	0.0658272			13.1612	0.0426108
13.1694	0.00814044			13.1745	0.066425			13.1691	0.0429043
13.1773	0.00810495			13.1824	0.0669736			13.177	0.0431047
13.1852	0.00808823			13.1903	0.0675861			13.1849	0.0431105
13.1931	0.00807152			13.1982	0.0680945			13.1928	0.0431274
13.201	0.0080205			13.2061	0.0684539			13.2007	0.0431606
13.2089	0.00801767			13.2139	0.0689231			13.2086	0.0433318
13.2168	0.00801484			13.2218	0.0695471			13.2165	0.0433509
13.2247	0.00801113			13.2297	0.0700399			13.2244	0.0434004
13.2326	0.00792466			13.2376	0.0704998			13.2323	0.0435566
13.2405	0.00794722			13.2455	0.0709773			13.2402	0.0437952
13.2484	0.00795301			13.2534	0.0716303			13.2481	0.0439405
13.2563	0.00794071			13.2613	0.0720235			13.256	0.0440021
13.2642	0.0079284			13.2692	0.0724309			13.2639	0.0440722
13.2721	0.00789801			13.2771	0.0729582			13.2717	0.0441544
13.28	0.00775399			13.285	0.0732415			13.2796	0.0441899
13.2879	0.00785105			13.2929	0.0738603			13.2875	0.0442254
13.2958	0.00785244			13.3008	0.0744316			13.2954	0.0444838
13.3037	0.00785384			13.3087	0.0749084			13.3033	0.044505
13.3115	0.00780965			13.3166	0.0754725			13.3112	0.0445027
13.3194	0.00788145			13.3245	0.0758865			13.3191	0.0445004
13.3273	0.00795325			13.3324	0.076498			13.327	0.0447079
13.3352	0.00801677			13.3403	0.076955			13.3349	0.0447763
13.3431	0.00819323			13.3482	0.0775018			13.3428	0.0447991
13.351	0.00820954			13.3561	0.0779338			13.3507	0.0448218
13.3589	0.00824056			13.364	0.0781674			13.3586	0.0452227
13.3668	0.00827158			13.3719	0.0785673			13.3665	0.0453162
13.3747	0.00831548			13.3797	0.0791493			13.3744	0.0453216
13.3826	0.00832184			13.3876	0.0795721			13.3823	0.045359
13.3905	0.00832821			13.3955	0.079721			13.3902	0.0454213
13.3984	0.00835902			13.4034	0.0801411			13.3981	0.0454537
13.4063	0.00839844			13.4113	0.0807413			13.406	0.045447
13.4142	0.00839622			13.4192	0.0810896			13.4139	0.0454404
13.4221	0.008394			13.4271	0.081205			13.4218	0.0454214
13.43	0.00838233			13.435	0.081591			13.4296	0.0454784
13.4379	0.00837066			13.4429	0.0820261			13.4375	0.0454844
13.4458	0.00842871			13.4508	0.0823663			13.4454	0.0454632
13.4537	0.00854837			13.4587	0.0826607			13.4533	0.0454419
13.4616	0.00877739			13.4666	0.0830858			13.4612	0.0453109
13.4695	0.00891176			13.4745	0.0834632			13.4691	0.0453348
13.4773	0.00892668			13.4824	0.0836085			13.477	0.0453073
13.4852	0.00887985			13.4903	0.0838308			13.4849	0.0452797
13.4931	0.00883302			13.4982	0.0842188			13.4928	0.0452009
13.501	0.00872974			13.5061	0.0845288			13.5007	0.0451867
13.5089	0.008595			13.514	0.0846253			13.5086	0.0451725
13.5168	0.00890931			13.5219	0.0849151			13.5165	0.0450714
13.5247	0.00903362			13.5298	0.0851252			13.5244	0.0450819
13.5326	0.00920373			13.5376	0.0852111			13.5323	0.0450678
13.5405	0.00920983			13.5455	0.0854			13.5402	0.0450536
13.5484	0.00921056			13.5534	0.0855681			13.5481	0.0450147
13.5563	0.00921128			13.5613	0.0858185			13.556	0.0449285
13.5642	0.00934139			13.5692	0.0861329			13.5639	0.0448674
13.5721	0.00947911			13.5771	0.0862125			13.5718	0.0447372
13.58	0.00948552			13.585	0.0863693			13.5797	0.0446985
13.5879	0.00947076			13.5929	0.0865463			13.5876	0.0445631
13.5958	0.00945601			13.6008	0.086599			13.5954	0.0443569
13.6037	0.00946771			13.6087	0.0866161			13.6033	0.0442708
13.6116	0.00945676			13.6166	0.0866272			13.6112	0.0440343
13.6195	0.0094458			13.6245	0.0866384			13.6191	0.0438672
13.6274	0.00940361			13.6324	0.0867257			13.627	0.0436868
13.6352	0.00936142			13.6403	0.0867225			13.6349	0.0436797
13.6431	0.0092575			13.6482	0.0867192			13.6428	0.04341
13.651	0.00933719			13.6561	0.086685			13.6507	0.0429349
13.6589	0.00942076			13.664	0.0865538			13.6586	0.0427369
13.6668	0.00947415			13.6719	0.0865257			13.6665	0.0427052
13.6747	0.00952753			13.6798	0.0865451			13.6744	0.0426734
13.6826	0.0095952			13.6877	0.0865495			13.6823	0.0424723
13.6905	0.00960597			13.6955	0.0865538			13.6902	0.0423048
13.6984	0.00961233			13.7034	0.0864527			13.6981	0.0421394
13.7063	0.00961869			13.7113	0.0864325			13.706	0.0420889
13.7142	0.00960473			13.7192	0.0863406			13.7139	0.0417219
13.7221	0.00959076			13.7271	0.0859823			13.7218	0.0414807
13.73	0.00950066			13.735	0.0857963			13.7297	0.041464
13.7379	0.0095081			13.7429	0.0857134			13.7376	0.0412507
13.7458	0.00950853			13.7508	0.0853777			13.7455	0.0412402
13.7537	0.00950896			13.7587	0.0851285			13.7533	0.0412208
13.7616	0.00939918			13.7666	0.0850285			13.7612	0.04079
13.7695	0.00942583			13.7745	0.0847112			13.7691	0.0407837
13.7774	0.00942477			13.7824	0.0844006			13.777	0.0407774
13.7853	0.0094237			13.7903	0.0840681			13.7849	0.0404135
13.7931	0.00933515			13.7982	0.0836825			13.7928	0.0401389
13.801	0.00932108			13.8061	0.0834759			13.8007	0.0399399
13.8089	0.009307			13.814	0.0831803			13.8086	0.0396451
13.8168	0.00919245			13.8219	0.0831149			13.8165	0.0393589
13.8247	0.00908878			13.8298	0.0827185			13.8244	0.0391094
13.8326	0.00902802			13.8377	0.0822634			13.8323	0.0389539
13.8405	0.00902319			13.8456	0.081876			13.8402	0.0389733
13.8484	0.00890089			13.8535	0.081484			13.8481	0.0389466
13.8563	0.0088642			13.8613	0.0811095			13.856	0.03892
13.8642	0.00862308			13.8692	0.0805693			13.8639	0.038659
13.8721	0.00860073			13.8771	0.0803578			13.8718	0.0384406
13.88	0.00860427			13.885	0.0801764			13.8797	0.0381906
13.8879	0.00860782			13.8929	0.0796517			13.8876	0.0381906
13.8958	0.0085647			13.9008	0.0792827			13.8955	0.0381906
13.9037	0.00886166			13.9087	0.0789668			13.9034	0.0380316
13.9116	0.00883819			13.9166	0.07855			13.9113	0.0379212
13.9195	0.00881471			13.9245	0.0781263			13.9191	0.0379446
13.9274	0.00874814			13.9324	0.0773509			13.927	0.0379209
13.9353	0.00864887			13.9403	0.0769199			13.9349	0.0378971
13.9432	0.00859567			13.9482	0.0766722			13.9428	0.0378149
13.9511	0.00854246			13.9561	0.0761236			13.9507	0.0377277
13.9589	0.00851754			13.964	0.0756			13.9586	0.0376437
13.9668	0.00851994			13.9719	0.0753118			13.9665	0.0374841
13.9747	0.00836036			13.9798	0.0749536			13.9744	0.0374738
13.9826	0.00823673			13.9877	0.0745916			13.9823	0.0374636
13.9905	0.00824946			13.9956	0.0741025			13.9902	0.0370776
13.9984	0.00819142			14.0035	0.0735638			13.9981	0.037101
14.0063	0.00813339			14.0114	0.0732838			14.006	0.0371097
14.0142	0.00778794			14.0192	0.0728323			14.0139	0.0371404
14.0221	0.0077016			14.0271	0.072294			14.0218	0.0371355
14.03	0.00768689			14.035	0.071784			14.0297	0.0371306
14.0379	0.00767218			14.0429	0.0714475			14.0376	0.0370685
14.0458	0.00763242			14.0508	0.0709047			14.0455	0.0370562
14.0537	0.00755564			14.0587	0.0705379			14.0534	0.0371463
14.0616	0.00741434			14.0666	0.0700413			14.0613	0.0371608
14.0695	0.0074072			14.0745	0.069485			14.0692	0.037257
14.0774	0.00740006			14.0824	0.0691265			14.077	0.0373532
14.0853	0.0073318			14.0903	0.0686668			14.0849	0.0373591
14.0932	0.00729855			14.0982	0.0681468			14.0928	0.0373651
14.1011	0.00728907			14.1061	0.0677153			14.1007	0.0374805
14.109	0.0071561			14.114	0.0671596			14.1086	0.037684
14.1168	0.00710089			14.1219	0.0666494			14.1165	0.0377236
14.1247	0.00688217			14.1298	0.0663119			14.1244	0.0377292
14.1326	0.00687934			14.1377	0.0659012			14.1323	0.0377164
14.1405	0.00679462			14.1456	0.0655196			14.1402	0.0377037
14.1484	0.00670989			14.1535	0.0652154			14.1481	0.0376673
14.1563	0.00670793			14.1614	0.0648852			14.156	0.0376953
14.1642	0.00670596			14.1693	0.0644733			14.1639	0.0377835
14.1721	0.00668012			14.1771	0.0639774			14.1718	0.0379958
14.18	0.00665576			14.185	0.0633343			14.1797	0.0380564
14.1879	0.00663139			14.1929	0.0631062			14.1876	0.0381274
14.1958	0.00653874			14.2008	0.0628314			14.1955	0.0383644
14.2037	0.00636831			14.2087	0.0626141			14.2034	0.0385508
14.2116	0.006263			14.2166	0.0624473			14.2113	0.0388439
14.2195	0.00617158			14.2245	0.0618705			14.2192	0.0390374
14.2274	0.00608016			14.2324	0.061313			14.2271	0.0390555
14.2353	0.0060715			14.2403	0.061087			14.235	0.0390631
14.2432	0.00604514			14.2482	0.0608092			14.2428	0.0390707
14.2511	0.00584405			14.2561	0.0604385			14.2507	0.0392907
14.259	0.00573984			14.264	0.0599294			14.2586	0.0393125
14.2669	0.00559907			14.2719	0.0597002			14.2665	0.0393343
14.2748	0.0054407			14.2798	0.0593265			14.2744	0.0394114
14.2826	0.00515632			14.2877	0.0588757			14.2823	0.039568
14.2905	0.00511645			14.2956	0.0585489			14.2902	0.0397563
14.2984	0.00507658			14.3035	0.0581635			14.2981	0.0400181
14.3063	0.00496554			14.3114	0.0579654			14.306	0.0400964
14.3142	0.00493522			14.3193	0.057646			14.3139	0.0401294
14.3221	0.00475256			14.3272	0.0573382			14.3218	0.0401624
14.33	0.00468542			14.3351	0.0570386			14.3297	0.0403375
14.3379	0.00450712			14.3429	0.0568475			14.3376	0.040757
14.3458	0.00434637			14.3508	0.0564366			14.3455	0.0410458
14.3537	0.0042892			14.3587	0.0560436			14.3534	0.0413641
14.3616	0.00423202			14.3666	0.0557895			14.3613	0.0416744
14.3695	0.00413443			14.3745	0.0553459			14.3692	0.0417727
14.3774	0.00409214			14.3824	0.0550148			14.3771	0.0419294
14.3853	0.00398296			14.3903	0.0549318			14.385	0.0420861
14.3932	0.00391843			14.3982	0.054514			14.3929	0.0421289
14.4011	0.00360672			14.4061	0.0540975			14.4007	0.0424084
14.409	0.00351761			14.414	0.0537361			14.4086	0.0424999
14.4169	0.00339995			14.4219	0.0534479			14.4165	0.0425913
14.4248	0.00324124			14.4298	0.0533529			14.4244	0.0427226
14.4327	0.00316024			14.4377	0.0530929			14.4323	0.0430605
14.4405	0.00294314			14.4456	0.05272			14.4402	0.0431867
14.4484	0.0026331			14.4535	0.0522544			14.4481	0.0432594
14.4563	0.00253533			14.4614	0.0519088			14.456	0.0434508
14.4642	0.0025243			14.4693	0.0515202			14.4639	0.0437037
14.4721	0.00251328			14.4772	0.0511856			14.4718	0.0438973
14.48	0.00232385			14.4851	0.0508366			14.4797	0.0441739
14.4879	0.00224335			14.493	0.0504462			14.4876	0.0443352
14.4958	0.00222505			14.5008	0.050204			14.4955	0.0444706
14.5037	0.00216755			14.5087	0.0498243			14.5034	0.0446932
14.5116	0.0019978			14.5166	0.0493938			14.5113	0.0449312
14.5195	0.00188788			14.5245	0.0490188			14.5192	0.045277
14.5274	0.00171763			14.5324	0.0487186			14.5271	0.0457066
14.5353	0.00154802			14.5403	0.0485406			14.535	0.0459471
14.5432	0.00142583			14.5482	0.0482706			14.5429	0.0461695
14.5511	0.00132835			14.5561	0.0478238			14.5508	0.0463164
14.559	0.00137736			14.564	0.0473266			14.5587	0.0466741
14.5669	0.00137659			14.5719	0.0468148			14.5665	0.0472269
14.5748	0.00137582			14.5798	0.0465181			14.5744	0.0477026
14.5827	0.00119206			14.5877	0.0462708			14.5823	0.0481639
14.5906	0.00112963			14.5956	0.0458197			14.5902	0.0484987
14.5985	0.00109375			14.6035	0.045311			14.5981	0.0487053
14.6063	0.00105786			14.6114	0.044903			14.606	0.0490144
14.6142	0.000936354			14.6193	0.0444923			14.6139	0.0495479
14.6221	0.000615429			14.6272	0.0440392			14.6218	0.0501097
14.63	0.000643853			14.6351	0.0435328			14.6297	0.0505169
14.6379	0.000608045			14.643	0.043076			14.6376	0.0508107
14.6458	0.000572236			14.6509	0.0427543			14.6455	0.0514071
14.6537	0.000473226			14.6588	0.0423414			14.6534	0.0519421
14.6616	0.000322797			14.6666	0.0418266			14.6613	0.0522678
14.6695	0.000251402			14.6745	0.041367			14.6692	0.0526957
14.6774	0.000152158			14.6824	0.0410604			14.6771	0.0534348
14.6853	0.000120889			14.6903	0.0405886			14.685	0.0540363
14.6932	-8.52542e-05			14.6982	0.0402213			14.6929	0.0544728
14.7011	-0.000318624			14.7061	0.0395617			14.7008	0.0549141
14.709	-0.000295109			14.714	0.0391182			14.7087	0.0555643
14.7169	-0.000308455			14.7219	0.0386337			14.7166	0.0563375
14.7248	-0.000321801			14.7298	0.0383062			14.7244	0.0571355
14.7327	-0.000340387			14.7377	0.0379174			14.7323	0.0580291
14.7406	-0.000358973			14.7456	0.0374627			14.7402	0.0587712
14.7485	-0.000414863			14.7535	0.0368065			14.7481	0.0595223
14.7564	-0.000448385			14.7614	0.0363193			14.756	0.0603069
14.7642	-0.000481906			14.7693	0.0360561			14.7639	0.0610756
14.7721	-0.000552462			14.7772	0.0357284			14.7718	0.0617568
14.78	-0.000623019			14.7851	0.0353595			14.7797	0.0622941
14.7879	-0.000664367			14.793	0.0349495			14.7876	0.063034
14.7958	-0.000950504			14.8009	0.0344207			14.7955	0.0638239
14.8037	-0.000888395			14.8088	0.0339973			14.8034	0.0645804
14.8116	-0.000873365			14.8167	0.0336079			14.8113	0.0654942
14.8195	-0.000864516			14.8245	0.0332781			14.8192	0.0663234
14.8274	-0.000878405			14.8324	0.0329739			14.8271	0.0670409
14.8353	-0.000892294			14.8403	0.0325746			14.835	0.0680544
14.8432	-0.000928922			14.8482	0.0321191			14.8429	0.0690125
14.8511	-0.00101545			14.8561	0.0316747			14.8508	0.0698391
14.859	-0.00113301			14.864	0.0312907			14.8587	0.0705956
14.8669	-0.00125057			14.8719	0.0311692			14.8666	0.0714639
14.8748	-0.00142611			14.8798	0.030929			14.8745	0.0723105
14.8827	-0.00144443			14.8877	0.0304314			14.8824	0.0730017
14.8906	-0.00146275			14.8956	0.0299887			14.8902	0.0740588
14.8985	-0.00150728			14.9035	0.0295812			14.8981	0.0751786
14.9064	-0.00166332			14.9114	0.0291579			14.906	0.0760284
14.9143	-0.00178784			14.9193	0.0286713			14.9139	0.0770298
14.9222	-0.00180349			14.9272	0.0284909			14.9218	0.0778869
14.93	-0.00181421			14.9351	0.0281741			14.9297	0.0786512
14.9379	-0.00188038			14.943	0.0278604			14.9376	0.0795672
14.9458	-0.00206284			14.9509	0.0274024			14.9455	0.0804312
14.9537	-0.00207869			14.9588	0.0270485			14.9534	0.0813592
14.9616	-0.00209454			14.9667	0.0267574			14.9613	0.0821059
14.9695	-0.0021594			14.9746	0.0263936			14.9692	0.0827434
14.9774	-0.00223486			14.9824	0.0261505			14.9771	0.0836655
14.9853	-0.00229332			14.9903	0.0258056			14.985	0.0845148
14.9932	-0.0023411			14.9982	0.0255131			14.9929	0.08507
15.0011	-0.00238888			15.0061	0.0251922			15.0008	0.0855992
15.009	-0.00249081			15.014	0.0248727			15.0087	0.0861336
15.0169	-0.00251856			15.0219	0.0245338			15.0166	0.0864858
15.0248	-0.00250915			15.0298	0.0243218			15.0245	0.087048
15.0327	-0.0025161			15.0377	0.0241195			15.0324	0.0875582
15.0406	-0.00252306			15.0456	0.0238311			15.0403	0.0881685
15.0485	-0.00255816			15.0535	0.0237717			15.0481	0.0887281
15.0564	-0.00263736			15.0614	0.0235541			15.056	0.0890709
15.0643	-0.00265713			15.0693	0.023229			15.0639	0.0893598
15.0722	-0.00267689			15.0772	0.0230191			15.0718	0.089614
15.0801	-0.00284035			15.0851	0.0228024			15.0797	0.0900541
15.0879	-0.0027269			15.093	0.022727			15.0876	0.0902112
15.0958	-0.00276942			15.1009	0.0223178			15.0955	0.0904446
15.1037	-0.00281193			15.1088	0.0220567			15.1034	0.0907661
15.1116	-0.00290979			15.1167	0.0220412			15.1113	0.0909346
15.1195	-0.00311244			15.1246	0.0217901			15.1192	0.0909577
15.1274	-0.00311867			15.1325	0.0217604			15.1271	0.0909681
15.1353	-0.0031884			15.1404	0.0217023			15.135	0.0909616
15.1432	-0.00325813			15.1482	0.0216443			15.1429	0.0909552
15.1511	-0.00342028			15.1561	0.0215002			15.1508	0.0907783
15.159	-0.00351769			15.164	0.0212471			15.1587	0.0906078
15.1669	-0.00353321			15.1719	0.0209729			15.1666	0.0904152
15.1748	-0.00354872			15.1798	0.0207998			15.1745	0.0902533
15.1827	-0.0035987			15.1877	0.0205483			15.1824	0.0899015
15.1906	-0.00357688			15.1956	0.020384			15.1903	0.0895836
15.1985	-0.00358157			15.2035	0.0201593			15.1982	0.089459
15.2064	-0.00358626			15.2114	0.0200243			15.206	0.0892232
15.2143	-0.00371488			15.2193	0.0200042			15.2139	0.0887805
15.2222	-0.00367583			15.2272	0.0199841			15.2218	0.0883717
15.2301	-0.0036372			15.2351	0.0199035			15.2297	0.0881127
15.238	-0.00360729			15.243	0.0197855			15.2376	0.0875193
15.2459	-0.00357329			15.2509	0.0195669			15.2455	0.0868785
15.2537	-0.00354794			15.2588	0.0195637			15.2534	0.0864565
15.2616	-0.00353335			15.2667	0.019402			15.2613	0.0860199
15.2695	-0.00358233			15.2746	0.0192052			15.2692	0.0856708
15.2774	-0.00363132			15.2825	0.0191233			15.2771	0.0850344
15.2853	-0.00373102			15.2904	0.0189992			15.285	0.0844955
15.2932	-0.00372684			15.2983	0.0189852			15.2929	0.0839856
15.3011	-0.00369512			15.3061	0.018953			15.3008	0.0832726
15.309	-0.0036751			15.314	0.0189209			15.3087	0.0825159
15.3169	-0.00370854			15.3219	0.0188376			15.3166	0.0818552
15.3248	-0.00374198			15.3298	0.0185072			15.3245	0.0813427
15.3327	-0.00382888			15.3377	0.0183914			15.3324	0.0806921
15.3406	-0.00395576			15.3456	0.0182959			15.3403	0.07986
15.3485	-0.00414424			15.3535	0.0182005			15.3482	0.0791241
15.3564	-0.00418502			15.3614	0.018201			15.3561	0.0783862
15.3643	-0.00404842			15.3693	0.0182015			15.364	0.077711
15.3722	-0.00403233			15.3772	0.0181637			15.3718	0.0771167
15.3801	-0.00401624			15.3851	0.0180101			15.3797	0.0764504
15.388	-0.00401575			15.393	0.0180355			15.3876	0.0758383
15.3959	-0.00401527			15.4009	0.01813			15.3955	0.0749695
15.4038	-0.0041314			15.4088	0.018125			15.4034	0.0743094
15.4116	-0.00429488			15.4167	0.0181199			15.4113	0.0738998
15.4195	-0.00419473			15.4246	0.0180789			15.4192	0.0734148
15.4274	-0.00421307			15.4325	0.0176896			15.4271	0.0728103
15.4353	-0.00423142			15.4404	0.0176767			15.435	0.0718835
15.4432	-0.00429886			15.4483	0.0176637			15.4429	0.0711158
15.4511	-0.00433075			15.4562	0.0174577			15.4508	0.0705909
15.459	-0.00430103			15.464	0.0174074			15.4587	0.0701167
15.4669	-0.00417344			15.4719	0.0172219			15.4666	0.0693112
15.4748	-0.00411196			15.4798	0.0171941			15.4745	0.0685566
15.4827	-0.0040762			15.4877	0.0171527			15.4824	0.0683991
15.4906	-0.00398168			15.4956	0.017166			15.4903	0.0679702
15.4985	-0.00396412			15.5035	0.0170776			15.4982	0.0672666
15.5064	-0.00395444			15.5114	0.0168296			15.5061	0.0667239
15.5143	-0.00394476			15.5193	0.0166429			15.514	0.0660542
15.5222	-0.00389272			15.5272	0.0165834			15.5219	0.0655833
15.5301	-0.00367479			15.5351	0.0164855			15.5297	0.065214
15.538	-0.0036742			15.543	0.0162751			15.5376	0.0649052
15.5459	-0.00367362			15.5509	0.0161186			15.5455	0.0644841
15.5538	-0.00368692			15.5588	0.0161005			15.5534	0.0639419
15.5617	-0.00369064			15.5667	0.0160824			15.5613	0.0635872
15.5696	-0.00367718			15.5746	0.0158501			15.5692	0.0632267
15.5774	-0.00359512			15.5825	0.0158608			15.5771	0.0628381
15.5853	-0.00354281			15.5904	0.0158716			15.585	0.0626248
15.5932	-0.00339541			15.5983	0.0158319			15.5929	0.0623132
15.6011	-0.00316598			15.6062	0.0156325			15.6008	0.0620482
15.609	-0.00316834			15.6141	0.0154291			15.6087	0.0617584
15.6169	-0.00317071			15.622	0.0154329			15.6166	0.0614374
15.6248	-0.00319686			15.6298	0.0154367			15.6245	0.0613811
15.6327	-0.00315047			15.6377	0.0152521			15.6324	0.0611316
15.6406	-0.00314248			15.6456	0.0152294			15.6403	0.0609452
15.6485	-0.0031345			15.6535	0.0152067			15.6482	0.0606085
15.6564	-0.00299278			15.6614	0.0150746			15.6561	0.0604822
15.6643	-0.00295646			15.6693	0.0150847			15.664	0.0604578
15.6722	-0.00292014			15.6772	0.0150547			15.6719	0.0604333
15.6801	-0.00261009			15.6851	0.0150246			15.6798	0.0602687
15.688	-0.00254373			15.693	0.0147571			15.6877	0.0601508
15.6959	-0.00255786			15.7009	0.0147896			15.6955	0.060315
15.7038	-0.00257199			15.7088	0.014807			15.7034	0.0603241
15.7117	-0.00261431			15.7167	0.0148177			15.7113	0.0603572
15.7196	-0.00256724			15.7246	0.0148285			15.7192	0.0606779
15.7275	-0.00249689			15.7325	0.0148327			15.7271	0.0607064
15.7353	-0.00227118			15.7404	0.0148111			15.735	0.0607348
15.7432	-0.00205073			15.7483	0.014678			15.7429	0.0608856
15.7511	-0.00194597			15.7562	0.0145235			15.7508	0.0614122
15.759	-0.00191219			15.7641	0.0144833			15.7587	0.06191
15.7669	-0.00189384			15.772	0.0144431			15.7666	0.0620966
15.7748	-0.0018832			15.7799	0.0143254			15.7745	0.0623036
15.7827	-0.00187257			15.7877	0.0141464			15.7824	0.062726
15.7906	-0.00161036			15.7956	0.0140765			15.7903	0.0633735
15.7985	-0.00148859			15.8035	0.0140519			15.7982	0.0638328
15.8064	-0.00145412			15.8114	0.0139161			15.8061	0.0645
15.8143	-0.00145569			15.8193	0.0138423			15.814	0.0652132
15.8222	-0.00145726			15.8272	0.013624			15.8219	0.0657592
15.8301	-0.00143227			15.8351	0.0134607			15.8298	0.0664598
15.838	-0.00140728			15.843	0.0134162			15.8377	0.0672479
15.8459	-0.00133528			15.8509	0.0133716			15.8456	0.0681592
15.8538	-0.00117899			15.8588	0.0132451			15.8534	0.0691703
15.8617	-0.0010784			15.8667	0.0130093			15.8613	0.0701198
15.8696	-0.00102634			15.8746	0.0127562			15.8692	0.0712537
15.8775	-0.000898271			15.8825	0.0125585			15.8771	0.0725129
15.8854	-0.000688024			15.8904	0.0123807			15.885	0.0737252
15.8932	-0.000584063			15.8983	0.0120583			15.8929	0.0749236
15.9011	-0.000602751			15.9062	0.0117925			15.9008	0.0764497
15.909	-0.000621438			15.9141	0.0114921			15.9087	0.0780854
15.9169	-0.000689909			15.922	0.0114019			15.9166	0.0796377
15.9248	-0.000540564			15.9299	0.0113497			15.9245	0.0810979
15.9327	-0.000455548			15.9378	0.0110917			15.9324	0.0827959
15.9406	-0.000370531			15.9456	0.0109485			15.9403	0.084705
15.9485	-0.000242774			15.9535	0.0109525			15.9482	0.0867881
15.9564	-0.000206816			15.9614	0.0109565			15.9561	0.08885
15.9643	-9.9835e-05			15.9693	0.0106297			15.964	0.0910257
15.9722	7.93694e-06			15.9772	0.0103139			15.9719	0.0933974
15.9801	0.000115709			15.9851	0.0103733			15.9798	0.0961712
15.988	0.000202391			15.993	0.0103754			15.9877	0.0988017
15.9959	0.000318709			16.0009	0.0103774			15.9956	0.101643
16.0038	0.000344587			16.0088	0.0102479			16.0035	0.104626
16.0117	0.000350987			16.0167	0.0101788			16.0114	0.107498
16.0196	0.000584224			16.0246	0.0100533			16.0192	0.110589
16.0275	0.000599685			16.0325	0.00980098			16.0271	0.113921
16.0354	0.000615146			16.0404	0.00962036			16.035	0.11721
16.0433	0.000654201			16.0483	0.00962074			16.0429	0.121028
16.0512	0.000857599			16.0562	0.0092378			16.0508	0.125082
16.059	0.000912268			16.0641	0.00913411			16.0587	0.129049
16.0669	0.000920172			16.072	0.00896801			16.0666	0.133003
16.0748	0.000921764			16.0799	0.00846885			16.0745	0.137424
16.0827	0.000923356			16.0878	0.0083421			16.0824	0.141892
16.0906	0.00098229			16.0957	0.00826375			16.0903	0.146515
16.0985	0.00101881			16.1036	0.00818541			16.0982	0.151094
16.1064	0.00104386			16.1114	0.00789189			16.1061	0.156112
16.1143	0.00105757			16.1193	0.00778137			16.114	0.16136
16.1222	0.00107128			16.1272	0.00769761			16.1219	0.166568
16.1301	0.00121945			16.1351	0.00752875			16.1298	0.171861
16.138	0.0013817			16.143	0.00740802			16.1377	0.177509
16.1459	0.00148496			16.1509	0.00735163			16.1456	0.183388
16.1538	0.00153443			16.1588	0.00736353			16.1535	0.189197
16.1617	0.00154265			16.1667	0.00735138			16.1614	0.195135
16.1696	0.00153015			16.1746	0.00715508			16.1693	0.201054
16.1775	0.00151766			16.1825	0.00693411			16.1771	0.20703
16.1854	0.00154454			16.1904	0.00671159			16.185	0.213354
16.1933	0.00192278			16.1983	0.00660147			16.1929	0.219971
16.2012	0.00202862			16.2062	0.00654432			16.2008	0.22637
16.2091	0.0020622			16.2141	0.00646853			16.2087	0.232787
16.2169	0.00209579			16.222	0.00635074			16.2166	0.239187
16.2248	0.00203361			16.2299	0.00633592			16.2245	0.245773
16.2327	0.00197142			16.2378	0.00630827			16.2324	0.252216
16.2406	0.00181145			16.2457	0.00604598			16.2403	0.258788
16.2485	0.00218973			16.2536	0.00602502			16.2482	0.265309
16.2564	0.00235435			16.2615	0.00592602			16.2561	0.272033
16.2643	0.00251897			16.2693	0.0055207			16.264	0.278403
16.2722	0.00253292			16.2772	0.00553692			16.2719	0.28486
16.2801	0.00252776			16.2851	0.00552252			16.2798	0.291365
16.288	0.00252261			16.293	0.00550811			16.2877	0.297689
16.2959	0.00261714			16.3009	0.00544706			16.2956	0.303951
16.3038	0.00278932			16.3088	0.00532391			16.3035	0.310013
16.3117	0.00299427			16.3167	0.00528805			16.3114	0.315898
16.3196	0.00305413			16.3246	0.00527549			16.3193	0.321676
16.3275	0.00308069			16.3325	0.00508478			16.3272	0.327274
16.3354	0.0030375			16.3404	0.00512829			16.3351	0.332849
16.3433	0.00299431			16.3483	0.00514708			16.3429	0.338179
16.3512	0.00283743			16.3562	0.00514146			16.3508	0.34328
16.3591	0.00289345			16.3641	0.00513584			16.3587	0.348136
16.367	0.00291607			16.372	0.00505323			16.3666	0.352649
16.3749	0.00293868			16.3799	0.00499744			16.3745	0.356852
16.3827	0.00313395			16.3878	0.00494144			16.3824	0.360867
16.3906	0.00328079			16.3957	0.0051074			16.3903	0.364784
16.3985	0.00335547			16.4036	0.00510958			16.3982	0.368236
16.4064	0.00343015			16.4115	0.00511176			16.4061	0.371358
16.4143	0.00346351			16.4194	0.00501802			16.414	0.373995
16.4222	0.00358763			16.4273	0.00499186			16.4219	0.376388
16.4301	0.0036365			16.4351	0.00501048			16.4298	0.378449
16.438	0.00368537			16.443	0.00501497			16.4377	0.380052
16.4459	0.00369764			16.4509	0.00501946			16.4456	0.381594
16.4538	0.0037028			16.4588	0.00518574			16.4535	0.38297
16.4617	0.00370795			16.4667	0.00517874			16.4614	0.383771
16.4696	0.00377105			16.4746	0.00517175			16.4693	0.383847
16.4775	0.0037963			16.4825	0.00508759			16.4772	0.383791
16.4854	0.00378716			16.4904	0.00497108			16.4851	0.383736
16.4933	0.00377802			16.4983	0.00503188			16.493	0.382805
16.5012	0.00376178			16.5062	0.00509268			16.5008	0.381989
16.5091	0.00367463			16.5141	0.00524166			16.5087	0.380681
16.517	0.00358748			16.522	0.00528724			16.5166	0.378967
16.5249	0.00345822			16.5299	0.00531312			16.5245	0.377102
16.5328	0.00348329			16.5378	0.00533901			16.5324	0.374805
16.5406	0.00349188			16.5457	0.00536151			16.5403	0.372179
16.5485	0.00349791			16.5536	0.00537271			16.5482	0.36944
16.5564	0.00350394			16.5615	0.00538391			16.5561	0.366336
16.5643	0.00352492			16.5694	0.00548809			16.564	0.362748
16.5722	0.00361411			16.5773	0.00549014			16.5719	0.35897
16.5801	0.00363012			16.5852	0.0054922			16.5798	0.354908
16.588	0.00361976			16.593	0.00538941			16.5877	0.350664
16.5959	0.00360939			16.6009	0.00557968			16.5956	0.346028
16.6038	0.00357244			16.6088	0.0057285			16.6035	0.341416
16.6117	0.00353548			16.6167	0.00579024			16.6114	0.336457
16.6196	0.00338721			16.6246	0.0057791			16.6193	0.331166
16.6275	0.00331653			16.6325	0.00576797			16.6272	0.326077
16.6354	0.00320026			16.6404	0.00598804			16.6351	0.320893
16.6433	0.0032332			16.6483	0.00604639			16.643	0.315212
16.6512	0.00323543			16.6562	0.00604395			16.6509	0.309248
16.6591	0.00323765			16.6641	0.0060415			16.6588	0.303343
16.667	0.00307897			16.672	0.00635533			16.6666	0.297587
16.6749	0.0028242			16.6799	0.00663906			16.6745	0.291594
16.6828	0.00287904			16.6878	0.00681948			16.6824	0.285426
16.6907	0.00283055			16.6957	0.0070297			16.6903	0.279066
16.6986	0.00278206			16.7036	0.00710921			16.6982	0.272887
16.7064	0.00258636			16.7115	0.00710555			16.7061	0.266624
16.7143	0.00285194			16.7194	0.00710189			16.714	0.260322
16.7222	0.00287136			16.7273	0.00703036			16.7219	0.253896
16.7301	0.00287285			16.7352	0.00711414			16.7298	0.247251
16.738	0.00287434			16.7431	0.00737535			16.7377	0.240934
16.7459	0.00267082			16.7509	0.00739602			16.7456	0.234714
16.7538	0.00266686			16.7588	0.00737859			16.7535	0.228602
16.7617	0.00276137			16.7667	0.00736115			16.7614	0.222333
16.7696	0.00278608			16.7746	0.00736494			16.7693	0.21606
16.7775	0.00277589			16.7825	0.00742454			16.7772	0.210139
16.7854	0.0027657			16.7904	0.00768304			16.7851	0.203952
16.7933	0.00260975			16.7983	0.00784046			16.793	0.198326
16.8012	0.00252781			16.8062	0.00787628			16.8009	0.192638
16.8091	0.0024473			16.8141	0.00791918			16.8088	0.186819
16.817	0.00244472			16.822	0.00792244			16.8167	0.181093
16.8249	0.00233084			16.8299	0.00792569			16.8245	0.175491
16.8328	0.00232372			16.8378	0.00800703			16.8324	0.170032
16.8407	0.00222923			16.8457	0.00806659			16.8403	0.164798
16.8486	0.00213474			16.8536	0.00812616			16.8482	0.159583
16.8565	0.00216466			16.8615	0.00833747			16.8561	0.154381
16.8643	0.00217454			16.8694	0.00835708			16.864	0.149279
16.8722	0.00218442			16.8773	0.00837302			16.8719	0.144345
16.8801	0.00217441			16.8852	0.00838896			16.8798	0.139678
16.888	0.00216441			16.8931	0.00837971			16.8877	0.135229
16.8959	0.00209117			16.901	0.00829249			16.8956	0.130721
16.9038	0.00215242			16.9089	0.00845938			16.9035	0.126189
16.9117	0.00213507			16.9167	0.0088242			16.9114	0.121858
16.9196	0.00211772			16.9246	0.00891294			16.9193	0.117726
16.9275	0.00207278			16.9325	0.008945			16.9272	0.113728
16.9354	0.0022343			16.9404	0.00897707			16.9351	0.109571
16.9433	0.00229554			16.9483	0.00902109			16.943	0.105842
16.9512	0.00215483			16.9562	0.00906511			16.9509	0.102112
16.9591	0.00201412			16.9641	0.0091041			16.9588	0.0983145
16.967	0.00202259			16.972	0.00909907			16.9667	0.0948832
16.9749	0.00203361			16.9799	0.00909404			16.9746	0.0915155
16.9828	0.00204464			16.9878	0.00905479			16.9825	0.0881123
16.9907	0.0020664			16.9957	0.00906235			16.9903	0.0850052
16.9986	0.00207498			17.0036	0.00906992			16.9982	0.0820374
17.0065	0.00206308			17.0115	0.00900798			17.0061	0.0789857
17.0144	0.00205117			17.0194	0.0090586			17.014	0.076287
17.0223	0.0020366			17.0273	0.00913056			17.0219	0.07369
17.0301	0.00193299			17.0352	0.00914918			17.0298	0.0713697
17.038	0.00180231			17.0431	0.00913345			17.0377	0.068834
17.0459	0.00196869			17.051	0.00911772			17.0456	0.066111
17.0538	0.00213527			17.0589	0.00903523			17.0535	0.0637897
17.0617	0.00217927			17.0668	0.00897163			17.0614	0.0618054
17.0696	0.00218213			17.0746	0.00891233			17.0693	0.0596521
17.0775	0.00218498			17.0825	0.00910889			17.0772	0.0578208
17.0854	0.00194646			17.0904	0.00919409			17.0851	0.0561651
17.0933	0.00170289			17.0983	0.00927928			17.093	0.0542406
17.1012	0.0017864			17.1062	0.0093418			17.1009	0.0523523
17.1091	0.00182377			17.1141	0.00937952			17.1088	0.0504967
17.117	0.00183806			17.122	0.00936545			17.1167	0.0489592
17.1249	0.00185235			17.1299	0.00935138			17.1246	0.0474468
17.1328	0.00188672			17.1378	0.0092968			17.1325	0.0459831
17.1407	0.00185723			17.1457	0.00934968			17.1404	0.0444936
17.1486	0.00182773			17.1536	0.00937884			17.1482	0.0429591
17.1565	0.00176196			17.1615	0.00933405			17.1561	0.041572
17.1644	0.00175156			17.1694	0.00928927			17.164	0.0400586
17.1723	0.00184754			17.1773	0.00920216			17.1719	0.0387143
17.1802	0.00186712			17.1852	0.00913069			17.1798	0.0377752
17.188	0.00198122			17.1931	0.00920879			17.1877	0.0368148
17.1959	0.00200972			17.201	0.00923128			17.1956	0.0354501
17.2038	0.00201382			17.2089	0.00922818			17.2035	0.0343798
17.2117	0.00201793			17.2168	0.00922509			17.2114	0.0333133
17.2196	0.00199764			17.2247	0.0091964			17.2193	0.0323423
17.2275	0.00194819			17.2325	0.00906913			17.2272	0.0314038
17.2354	0.00198789			17.2404	0.0092619			17.2351	0.0305214
17.2433	0.00200589			17.2483	0.00923624			17.243	0.0296421
17.2512	0.00202389			17.2562	0.00921057			17.2509	0.0287533
17.2591	0.00203139			17.2641	0.00911953			17.2588	0.0280584
17.267	0.00205456			17.272	0.00884634			17.2667	0.0274519
17.2749	0.00215306			17.2799	0.00888211			17.2746	0.0267825
17.2828	0.00216697			17.2878	0.00888949			17.2825	0.0260734
17.2907	0.0021323			17.2957	0.00889687			17.2904	0.0254588
17.2986	0.00209764			17.3036	0.00872233			17.2983	0.0248294
17.3065	0.00201441			17.3115	0.00874597			17.3061	0.0240916
17.3144	0.00185996			17.3194	0.00873178			17.314	0.0235657
17.3223	0.00211014			17.3273	0.00871759			17.3219	0.0230221
17.3302	0.00213487			17.3352	0.00860944			17.3298	0.0223511
17.3381	0.0021471			17.3431	0.00840652			17.3377	0.0217644
17.346	0.00215934			17.351	0.00844106			17.3456	0.0212236
17.3538	0.00216505			17.3589	0.00844066			17.3535	0.0206414
17.3617	0.00215804			17.3668	0.00844027			17.3614	0.0201742
17.3696	0.00215102			17.3747	0.00844357			17.3693	0.0196491
17.3775	0.00214691			17.3826	0.00844687			17.3772	0.0190949
17.3854	0.00240574			17.3905	0.00836423			17.3851	0.0186028
17.3933	0.00244942			17.3983	0.00841739			17.393	0.0182519
17.4012	0.00251147			17.4062	0.00841649			17.4009	0.0175853
17.4091	0.00254179			17.4141	0.00841558			17.4088	0.017075
17.417	0.00248316			17.422	0.00836677			17.4167	0.0168856
17.4249	0.00242453			17.4299	0.00828711			17.4246	0.0164917
17.4328	0.0023181			17.4378	0.00818341			17.4325	0.0159264
17.4407	0.00242082			17.4457	0.00809512			17.4404	0.0153886
17.4486	0.00252353			17.4536	0.00809711			17.4483	0.0149514
17.4565	0.00251895			17.4615	0.0080991			17.4562	0.0147363
17.4644	0.00251437			17.4694	0.00800615			17.4641	0.014352
17.4723	0.00248855			17.4773	0.00782767			17.4719	0.0139616
17.4802	0.00222353			17.4852	0.00798209			17.4798	0.0136856
17.4881	0.00224983			17.4931	0.00800224			17.4877	0.0131689
17.496	0.00225175			17.501	0.00801975			17.4956	0.012786
17.5039	0.00225366			17.5089	0.00802318			17.5035	0.0124432
17.5117	0.00213057			17.5168	0.0080266			17.5114	0.012223
17.5196	0.00220855			17.5247	0.00788457			17.5193	0.0120664
17.5275	0.00225836			17.5326	0.00777562			17.5272	0.0119452
17.5354	0.00230818			17.5405	0.00768084			17.5351	0.0117133
17.5433	0.00237281			17.5484	0.00765738			17.543	0.0111599
17.5512	0.00239696			17.5562	0.00763391			17.5509	0.0107875
17.5591	0.00234613			17.5641	0.00752655			17.5588	0.0105904
17.567	0.00229529			17.572	0.00754246			17.5667	0.010453
17.5749	0.00223681			17.5799	0.00748863			17.5746	0.010092
17.5828	0.00228612			17.5878	0.0075346			17.5825	0.0097129
17.5907	0.00228064			17.5957	0.00761101			17.5904	0.00956135
17.5986	0.00227516			17.6036	0.00762572			17.5983	0.00934397
17.6065	0.00224435			17.6115	0.00764044			17.6062	0.00931138
17.6144	0.0022229			17.6194	0.00760348			17.6141	0.00908163
17.6223	0.00216091			17.6273	0.00756652			17.622	0.00862749
17.6302	0.00209891			17.6352	0.00746793			17.6298	0.00823062
17.6381	0.00206192			17.6431	0.00747366			17.6377	0.00786416
17.646	0.00202493			17.651	0.00747939			17.6456	0.00773691
17.6539	0.00211087			17.6589	0.00744319			17.6535	0.00770377
17.6618	0.00213754			17.6668	0.00740555			17.6614	0.00762683
17.6697	0.0021642			17.6747	0.00736791			17.6693	0.00739374
17.6775	0.00219984			17.6826	0.00726484			17.6772	0.00727091
17.6854	0.00216175			17.6905	0.00728969			17.6851	0.00727186
17.6933	0.00212367			17.6984	0.0073276			17.693	0.00697455
17.7012	0.00211665			17.7063	0.00733139			17.7009	0.00673797
17.7091	0.00207818			17.7141	0.00733518			17.7088	0.00656272
17.717	0.00198169			17.722	0.00730486			17.7167	0.00627122
17.7249	0.00199988			17.7299	0.00721869			17.7246	0.00623606
17.7328	0.00215686			17.7378	0.00716944			17.7325	0.00621914
17.7407	0.00213755			17.7457	0.00701545			17.7404	0.00620222
17.7486	0.00211825			17.7536	0.00706337			17.7483	0.00601987
17.7565	0.00207483			17.7615	0.00707659			17.7562	0.00602116
17.7644	0.00193146			17.7694	0.00708981			17.7641	0.00598295
17.7723	0.00191188			17.7773	0.0071129			17.772	0.00594474
17.7802	0.00189231			17.7852	0.0071248			17.7799	0.00578537
17.7881	0.00183096			17.7931	0.00713669			17.7878	0.00572567
17.796	0.00185069			17.801	0.00703159			17.7956	0.00549238
17.8039	0.00185354			17.8089	0.00679363			17.8035	0.00520843
17.8118	0.00185639			17.8168	0.00685939			17.8114	0.00504852
17.8197	0.00180958			17.8247	0.00690311			17.8193	0.00491429
17.8276	0.00167649			17.8326	0.00691442			17.8272	0.00487902
17.8354	0.0016675			17.8405	0.00692574			17.8351	0.0047915
17.8433	0.00157269			17.8484	0.00690509			17.843	0.00470891
17.8512	0.00127642			17.8563	0.00676977			17.8509	0.00465115
17.8591	0.00142642			17.8642	0.00677162			17.8588	0.00460655
17.867	0.00142187			17.8721	0.00675913			17.8667	0.00458749
17.8749	0.00141733			17.8799	0.0067712			17.8746	0.00456842
17.8828	0.00139404			17.8878	0.00664669			17.8825	0.00449183
17.8907	0.00123362			17.8957	0.00653302			17.8904	0.00420423
17.8986	0.00115486			17.9036	0.00630066			17.8983	0.00416169
17.9065	0.000922199			17.9115	0.00616938			17.9062	0.00411914
17.9144	0.000809112			17.9194	0.00624913			17.9141	0.00400599
17.9223	0.000762066			17.9273	0.00624798			17.922	0.00393043
17.9302	0.000776334			17.9352	0.00624683			17.9299	0.00394767
17.9381	0.000780477			17.9431	0.0061136			17.9378	0.00395508
17.946	0.00078462			17.951	0.00603745			17.9457	0.00392029
17.9539	0.000612875			17.9589	0.0059613			17.9535	0.0038855
17.9618	0.000557008			17.9668	0.00595388			17.9614	0.00379997
17.9697	0.000552155			17.9747	0.00594646			17.9693	0.00379848
17.9776	0.000547301			17.9826	0.00576851			17.9772	0.0037747
17.9855	0.000302186			17.9905	0.00561507			17.9851	0.00375092
17.9933	0.000249062			17.9984	0.00551588			17.993	0.00367077
