# Supplementary material for: RNA-directed activation of cytoplasmic dynein-1 in reconstituted transport RNPs
Source: eLife journal article supplement (doi:10.7554/elife.36312), 2018-06-26
Supplement: supp [file elife-36312-supp-v1.zip › elife_poa_e36312_Figure_6_figure_supplement_4_source_data_1.xlsx]

## Sheet: Sheet1
Figure 6 - figure supplement 4A	Egl/BICD2 -ILS elution volume (ml; for differential refractive index axis)	Egl/BICD2 -ILS differential refractive index (normalised)	Egl/BICD2 -ILS elution volume (ml; for mean molar mass axis)	Egl/BICD2 -ILS mean molar mass (Da)	Egl/BICD2 +ILS elution volume (ml; for differential refractive index axis)	Egl/BICD2 +ILS differential refractive index (normalised)	Egl/BICD2 +ILS elution volume (ml; for mean molar mass axis)	Egl/BICD2 +ILS mean molar mass (Da)		Figure 6 - figure supplement 4B	BICD2 elution volume (ml; for differential refractive index axis)	BICD2 differential refractive index (normalised)	BICD2 elution volume (ml; for mean molar mass axis)	BICD2 mean molar mass (Da)	Egl/BICD2 -ILS elution volume (ml; for differential refractive index axis)	Egl/BICD2 -ILS differential refractive index (normalised)	Egl/BICD2 -ILS elution volume (ml; for mean molar mass axis)	Egl/BICD2 -ILS mean molar mass (Da)	Egl/BICD2 +ILS elution volume (ml; for differential refractive index axis)	Egl/BICD2 +ILS differential refractive index (normalised)	Egl/BICD2 +ILS elution volume (ml; for mean molar mass axis)	Egl/BICD2 +ILS mean molar mass (Da)
	9.0063	0.0182324	10.6729	192343	9.00503	0.190454	8.04546	3.83702e+06			9.00638	0.00270142	10.8033	183771	9.00168	0.0138719	10.637	208520	9.00117	0.0527418	9.62997	420429
	9.01471	0.0186234	10.6813	191983	9.01345	0.192286	8.05388	3.76511e+06			9.01427	0.00272115	10.8117	183476	9.00958	0.0137152	10.6454	207419	9.00907	0.0539192	9.63838	420283
	9.02313	0.0190638	10.6898	191991	9.02187	0.194088	8.0623	3.7232e+06			9.02217	0.00300312	10.8201	183174	9.01747	0.0138992	10.6538	206590	9.01697	0.0548762	9.6468	419826
	9.03155	0.0195791	10.6982	191946	9.03028	0.195841	8.07071	3.61065e+06			9.03006	0.00308137	10.8285	182880	9.02537	0.0144968	10.6623	205954	9.02486	0.055584	9.65522	419293
	9.03997	0.0201241	10.7066	191862	9.0387	0.19767	8.07913	3.52332e+06			9.03796	0.00319162	10.837	182746	9.03326	0.0145821	10.6707	205047	9.03276	0.056693	9.66364	418755
	9.04838	0.0206286	10.715	191475	9.04712	0.199651	8.08755	3.52376e+06			9.04585	0.00334809	10.8454	182550	9.04116	0.0146674	10.6791	204083	9.04065	0.0576456	9.67205	418433
	9.0568	0.0211269	10.7234	191188	9.05553	0.201681	8.09596	3.46685e+06			9.05375	0.00343657	10.8538	182751	9.04905	0.0148823	10.6875	203209	9.04855	0.058912	9.68047	418238
	9.06522	0.0215996	10.7318	190909	9.06395	0.203701	8.10438	3.37533e+06			9.06164	0.00349277	10.8622	182979	9.05695	0.015159	10.6959	202280	9.05644	0.0603001	9.68889	417908
	9.07364	0.0220739	10.7403	190750	9.07237	0.206016	8.1128	3.29453e+06			9.06954	0.00363657	10.8706	182846	9.06484	0.015649	10.7043	201612	9.06434	0.0613784	9.69731	417582
	9.08205	0.0225497	10.7487	190635	9.08079	0.208352	8.12122	3.21949e+06			9.07743	0.00382477	10.879	182705	9.07274	0.0157245	10.7128	200844	9.07223	0.0627075	9.70572	417586
	9.09047	0.0230449	10.7571	190570	9.0892	0.210725	8.12963	3.14929e+06			9.08533	0.00392718	10.8875	182555	9.08063	0.0158001	10.7212	200147	9.08013	0.0637035	9.71414	417263
	9.09889	0.0235277	10.7655	190444	9.09762	0.213332	8.13805	3.14086e+06			9.09322	0.00422807	10.8959	182482	9.08853	0.0161652	10.7296	199648	9.08802	0.0653069	9.72256	417015
	9.1073	0.0239912	10.7739	190339	9.10604	0.215903	8.14647	3.15303e+06			9.10112	0.00440352	10.9043	182319	9.09642	0.0166964	10.738	199122	9.09592	0.0665091	9.73097	416725
	9.11572	0.0244648	10.7823	190291	9.11446	0.218232	8.15489	3.05636e+06			9.10901	0.00454047	10.9127	182213	9.10432	0.0168181	10.7464	198696	9.10381	0.0676939	9.73939	416514
	9.12414	0.024938	10.7908	190289	9.12287	0.220674	8.1633	2.91772e+06			9.11691	0.00462191	10.9211	182147	9.11221	0.0169399	10.7548	198344	9.11171	0.06919	9.74781	416295
	9.13256	0.0254261	10.7992	190427	9.13129	0.223357	8.17172	2.84534e+06			9.1248	0.00468227	10.9296	182112	9.12011	0.0171663	10.7633	198007	9.1196	0.0707601	9.75623	415919
	9.14097	0.0259771	10.8076	190333	9.13971	0.226347	8.18014	2.78495e+06			9.1327	0.00478402	10.938	182015	9.128	0.0173928	10.7717	197474	9.1275	0.0723947	9.76464	415735
	9.14939	0.0265916	10.816	190181	9.14812	0.229315	8.18855	2.73602e+06			9.14059	0.00484231	10.9464	181915	9.1359	0.0179098	10.7801	197244	9.13539	0.0743276	9.77306	415630
	9.15781	0.0271721	10.8244	190146	9.15654	0.232133	8.19697	2.67062e+06			9.14849	0.00503903	10.9548	181904	9.14379	0.0187023	10.7885	197132	9.14329	0.0766916	9.78148	415468
	9.16623	0.0277239	10.8328	190080	9.16496	0.235011	8.20539	2.59684e+06			9.15638	0.00527206	10.9632	181853	9.15169	0.0187675	10.7969	196815	9.15118	0.0788858	9.7899	415245
	9.17464	0.0282689	10.8413	189937	9.17338	0.237772	8.21381	2.50792e+06			9.16428	0.00533052	10.9716	181821	9.15958	0.018955	10.8053	196464	9.15908	0.0805744	9.79831	415279
	9.18306	0.0287976	10.8497	189791	9.18179	0.240625	8.22222	2.44728e+06			9.17217	0.00545167	10.9801	181806	9.16748	0.0190076	10.8138	196270	9.16697	0.0827159	9.80673	415186
	9.19148	0.02931	10.8581	189745	9.19021	0.243558	8.23064	2.40777e+06			9.18007	0.00588833	10.9885	181706	9.17537	0.0191915	10.8222	196064	9.17487	0.0851753	9.81515	414929
	9.19989	0.0298585	10.8665	189766	9.19863	0.246722	8.23906	2.36968e+06			9.18796	0.00621214	10.9969	181715	9.18327	0.0193755	10.8306	195851	9.18276	0.087594	9.82356	414773
	9.20831	0.0304019	10.8749	189710	9.20705	0.249967	8.24748	2.28903e+06			9.19586	0.00622069	11.0053	181607	9.19116	0.0198143	10.839	196030	9.19066	0.0902261	9.83198	414564
	9.21673	0.0309333	10.8834	189687	9.21546	0.253164	8.25589	2.25491e+06			9.20375	0.00657068	11.0137	181553	9.19906	0.0204407	10.8474	196518	9.19855	0.0924219	9.8404	414472
	9.22515	0.0315093	10.8918	189716	9.22388	0.256741	8.26431	2.218e+06			9.21165	0.00674657	11.0221	181552	9.20695	0.0206967	10.8559	196621	9.20645	0.0949539	9.84882	414257
	9.23356	0.0320763	10.9002	189703	9.2323	0.260415	8.27273	2.12974e+06			9.21954	0.00686958	11.0306	181626	9.21485	0.0208086	10.8643	196456	9.21434	0.0978372	9.85723	414684
	9.24198	0.0326402	10.9086	189651	9.24071	0.264154	8.28114	2.08519e+06			9.22744	0.0070567	11.039	181659	9.22274	0.0209205	10.8727	196324	9.22224	0.100696	9.86565	415615
	9.2504	0.033196	10.917	189570	9.24913	0.267967	8.28956	2.03195e+06			9.23533	0.00708786	11.0474	181644	9.23064	0.0211113	10.8811	196223	9.23013	0.103992	9.87407	416072
	9.25882	0.0337536	10.9254	189565	9.25755	0.271891	8.29798	1.97729e+06			9.24323	0.00718623	11.0558	181673	9.23853	0.0216296	10.8895	196049	9.23803	0.107114	9.88249	415957
	9.26723	0.0342768	10.9339	189520	9.26597	0.275532	8.3064	1.92897e+06			9.25112	0.00733973	11.0642	181728	9.24643	0.0224105	10.8979	195806	9.24592	0.110099	9.8909	415837
	9.27565	0.0347772	10.9423	189503	9.27438	0.279182	8.31481	1.86764e+06			9.25902	0.00735144	11.0726	181792	9.25432	0.0225297	10.9064	195692	9.25382	0.113465	9.89932	415697
	9.28407	0.0353328	10.9507	189629	9.2828	0.283144	8.32323	1.82474e+06			9.26691	0.00746828	11.0811	181829	9.26222	0.022649	10.9148	195547	9.26172	0.11746	9.90774	415450
	9.29248	0.0358385	10.9591	189689	9.29122	0.287466	8.33165	1.78795e+06			9.27481	0.00768296	11.0895	181894	9.27011	0.0226934	10.9232	195383	9.26961	0.121155	9.91615	415175
	9.3009	0.0362942	10.9675	189700	9.29964	0.291929	8.34007	1.74807e+06			9.28271	0.00797357	11.0979	181910	9.27801	0.0230028	10.9316	195278	9.27751	0.124437	9.92457	415157
	9.30932	0.0367198	10.9759	189747	9.30805	0.296391	8.34848	1.72029e+06			9.2906	0.00805781	11.1063	181942	9.28591	0.0237941	10.94	195328	9.2854	0.128549	9.93299	415003
	9.31774	0.0371895	10.9844	189799	9.31647	0.300996	8.3569	1.68504e+06			9.2985	0.00812194	11.1147	182016	9.2938	0.0241772	10.9484	195363	9.2933	0.132944	9.94141	414844
	9.32615	0.0377104	10.9928	189781	9.32489	0.305726	8.36532	1.65668e+06			9.30639	0.00828593	11.1232	182056	9.3017	0.0244435	10.9569	195285	9.30119	0.137349	9.94982	414725
	9.33457	0.0382234	11.0012	189850	9.3333	0.310453	8.37373	1.61395e+06			9.31429	0.00876077	11.1316	182107	9.30959	0.0249269	10.9653	195188	9.30909	0.141453	9.95824	414440
	9.34299	0.0387019	11.0096	189954	9.34172	0.315441	8.38215	1.57346e+06			9.32218	0.00906645	11.14	182182	9.31749	0.0251916	10.9737	195211	9.31698	0.145948	9.96666	414298
	9.35141	0.039147	11.018	189929	9.35014	0.320449	8.39057	1.54972e+06			9.33008	0.00911666	11.1484	182236	9.32538	0.0253377	10.9821	195143	9.32488	0.150371	9.97508	414212
	9.35982	0.0395922	11.0264	189879	9.35856	0.325489	8.39899	1.52795e+06			9.33797	0.00928839	11.1568	182306	9.33328	0.0254484	10.9905	194978	9.33277	0.155472	9.98349	414222
	9.36824	0.0399972	11.0349	190020	9.36697	0.330586	8.4074	1.5254e+06			9.34587	0.00950304	11.1652	182369	9.34117	0.0254735	10.9989	194997	9.34067	0.160886	9.99191	414207
	9.37666	0.0403883	11.0433	190101	9.37539	0.335935	8.41582	1.51934e+06			9.35376	0.00971729	11.1737	182447	9.34907	0.0254985	11.0074	194946	9.34856	0.165878	10.0003	414188
	9.38507	0.0408218	11.0517	190049	9.38381	0.341431	8.42424	1.50262e+06			9.36166	0.00975852	11.1821	182537	9.35696	0.0261946	11.0158	194801	9.35646	0.170642	10.0087	413941
	9.39349	0.0412205	11.0601	190110	9.39223	0.347121	8.43266	1.48484e+06			9.36955	0.00984453	11.1905	182672	9.36486	0.0264531	11.0242	194866	9.36435	0.176666	10.0172	413547
	9.40191	0.0415947	11.0685	190247	9.40064	0.353211	8.44107	1.46711e+06			9.37745	0.00994794	11.1989	182762	9.37275	0.0266255	11.0326	194921	9.37225	0.182811	10.0256	413556
	9.41033	0.0419571	11.0769	190315	9.40906	0.359089	8.44949	1.43799e+06			9.38534	0.00998625	11.2073	182762	9.38065	0.0268051	11.041	195001	9.38014	0.188445	10.034	413600
	9.41874	0.0422912	11.0854	190336	9.41748	0.365189	8.45791	1.41445e+06			9.39324	0.010005	11.2157	182829	9.38854	0.027352	11.0495	195045	9.38804	0.194421	10.0424	413422
	9.42716	0.0426037	11.0938	190382	9.42589	0.371493	8.46632	1.40594e+06			9.40113	0.0100237	11.2242	182912	9.39644	0.0275647	11.0579	195047	9.39593	0.201173	10.0508	413276
	9.43558	0.04293	11.1022	190430	9.43431	0.377763	8.47474	1.40322e+06			9.40903	0.0101079	11.2326	183009	9.40433	0.0277774	11.0663	195058	9.40383	0.207768	10.0592	413348
	9.444	0.0432292	11.1106	190453	9.44273	0.384372	8.48316	1.38032e+06			9.41692	0.0102503	11.241	183138	9.41223	0.0279603	11.0747	195144	9.41172	0.213509	10.0677	413242
	9.45241	0.0434895	11.119	190493	9.45115	0.39112	8.49158	1.37211e+06			9.42482	0.0103281	11.2494	183216	9.42012	0.0281474	11.0831	195124	9.41962	0.22043	10.0761	413023
	9.46083	0.0437202	11.1275	190567	9.45956	0.398068	8.49999	1.37213e+06			9.43271	0.010474	11.2578	183271	9.42802	0.0282532	11.0915	195037	9.42751	0.227925	10.0845	413057
	9.46925	0.0439756	11.1359	190657	9.46798	0.404771	8.50841	1.36728e+06			9.44061	0.0107536	11.2662	183398	9.43591	0.0283589	11.1	195058	9.43541	0.235234	10.0929	413022
	9.47766	0.0442136	11.1443	190649	9.4764	0.41168	8.51683	1.34271e+06			9.4485	0.0110669	11.2747	183548	9.44381	0.0287389	11.1084	195128	9.4433	0.242785	10.1013	412909
	9.48608	0.0444299	11.1527	190689	9.48482	0.418774	8.52525	1.32858e+06			9.4564	0.0111233	11.2831	183656	9.4517	0.0291372	11.1168	195254	9.4512	0.250747	10.1098	412762
	9.4945	0.0446291	11.1611	190669	9.49323	0.425878	8.53366	1.30816e+06			9.46429	0.0112657	11.2915	183765	9.4596	0.029261	11.1252	195357	9.45909	0.259082	10.1182	412567
	9.50292	0.0448354	11.1695	190684	9.50165	0.43332	8.54208	1.28394e+06			9.47219	0.0114656	11.2999	183893	9.46749	0.0293847	11.1336	195611	9.46699	0.267318	10.1266	412363
	9.51133	0.0450286	11.178	190638	9.51007	0.440779	8.5505	1.26851e+06			9.48008	0.0116734	11.3083	184006	9.47539	0.0294063	11.142	195814	9.47488	0.274605	10.135	412201
	9.51975	0.0452111	11.1864	190669	9.51848	0.448379	8.55891	1.2541e+06			9.48798	0.0117076	11.3167	184122	9.48328	0.029428	11.1505	195784	9.48278	0.283028	10.1434	412029
	9.52817	0.0453949	11.1948	190737	9.5269	0.456214	8.56733	1.2314e+06			9.49587	0.0117159	11.3252	184243	9.49118	0.0293466	11.1589	195906	9.49067	0.292289	10.1518	411843
	9.53659	0.0455998	11.2032	190723	9.53532	0.464451	8.57575	1.21394e+06			9.50377	0.0117242	11.3336	184382	9.49907	0.0295126	11.1673	195991	9.49857	0.300834	10.1603	411576
	9.545	0.0457892	11.2116	190773	9.54374	0.472523	8.58417	1.20198e+06			9.51166	0.0119129	11.342	184582	9.50697	0.0301713	11.1757	196056	9.50647	0.309594	10.1687	411312
	9.55342	0.0459645	11.22	190803	9.55215	0.480374	8.59258	1.18266e+06			9.51956	0.0120847	11.3504	184738	9.51486	0.03033	11.1841	196248	9.51436	0.319028	10.1771	410946
	9.56184	0.0461246	11.2285	190825	9.56057	0.488471	8.601	1.17755e+06			9.52745	0.0120899	11.3588	184846	9.52276	0.0304887	11.1925	196329	9.52226	0.328501	10.1855	410827
	9.57025	0.0462619	11.2369	190786	9.56899	0.497224	8.60942	1.1786e+06			9.53535	0.0120951	11.3673	184970	9.53065	0.0306066	11.201	196264	9.53015	0.338116	10.1939	410640
	9.57867	0.0463789	11.2453	190775	9.57741	0.505941	8.61784	1.16597e+06			9.54324	0.0120808	11.3757	185132	9.53855	0.0308015	11.2094	196318	9.53805	0.347216	10.2023	410545
	9.58709	0.0464748	11.2537	190840	9.58582	0.514313	8.62625	1.15886e+06			9.55114	0.0121471	11.3841	185298	9.54644	0.031123	11.2178	196492	9.54594	0.35728	10.2108	410305
	9.59551	0.046556	11.2621	190857	9.59424	0.522512	8.63467	1.15383e+06			9.55904	0.0122341	11.3925	185379	9.55434	0.0314335	11.2262	196545	9.55384	0.367697	10.2192	409855
	9.60392	0.04664	11.2705	190915	9.60266	0.53096	8.64309	1.12846e+06			9.56693	0.0122426	11.4009	185587	9.56224	0.0315259	11.2346	196629	9.56173	0.3779	10.2276	409525
	9.61234	0.0467114	11.279	191059	9.61107	0.539969	8.6515	1.102e+06			9.57483	0.0122512	11.4093	185803	9.57013	0.031546	11.243	196849	9.56963	0.38835	10.236	409304
	9.62076	0.0467724	11.2874	191156	9.61949	0.548839	8.65992	1.08829e+06			9.58272	0.0125019	11.4178	185955	9.57803	0.0315661	11.2515	196887	9.57752	0.399202	10.2444	409000
	9.62918	0.0468349	11.2958	191273	9.62791	0.557884	8.66834	1.0841e+06			9.59062	0.0125273	11.4262	186160	9.58592	0.0315743	11.2599	196721	9.58542	0.410243	10.2528	408634
	9.63759	0.0468972	11.3042	191353	9.63633	0.566702	8.67676	1.07627e+06			9.59851	0.0125528	11.4346	186310	9.59382	0.0316696	11.2683	196225	9.59331	0.421089	10.2613	408303
	9.64601	0.0469465	11.3126	191459	9.64474	0.575632	8.68517	1.06693e+06			9.60641	0.0127799	11.443	186413	9.60171	0.0317649	11.2767	195907	9.60121	0.43201	10.2697	407952
	9.65443	0.0469825	11.321	191517	9.65316	0.584772	8.69359	1.06544e+06			9.6143	0.0128179	11.4514	186581	9.60961	0.0318838	11.2851	196037	9.6091	0.44291	10.2781	407487
	9.66284	0.0469867	11.3295	191542	9.66158	0.593823	8.70201	1.06258e+06			9.6222	0.012856	11.4598	186786	9.6175	0.0321692	11.2936	196286	9.617	0.453978	10.2865	407063
	9.67126	0.0469607	11.3379	191554	9.67	0.602971	8.71043	1.05318e+06			9.63009	0.0128727	11.4683	186949	9.6254	0.0323273	11.302	196506	9.62489	0.465678	10.2949	406807
	9.67968	0.0468916	11.3463	191607	9.67841	0.612245	8.71884	1.04223e+06			9.63799	0.0128584	11.4767	187045	9.63329	0.0324855	11.3104	196784	9.63279	0.476927	10.3033	406764
	9.6881	0.0468522	11.3547	191685	9.68683	0.621483	8.72726	1.03559e+06			9.64588	0.0128441	11.4851	187230	9.64119	0.0326218	11.3188	197166	9.64068	0.488241	10.3118	406493
	9.69651	0.0468403	11.3631	191754	9.69525	0.630687	8.73568	1.02667e+06			9.65378	0.0129867	11.4935	187365	9.64908	0.0330339	11.3272	197535	9.64858	0.500152	10.3202	406071
	9.70493	0.0468082	11.3716	191807	9.70366	0.640341	8.74409	1.02365e+06			9.66167	0.0130866	11.5019	187454	9.65698	0.0332886	11.3356	197836	9.65647	0.512111	10.3286	405805
	9.71335	0.0467562	11.38	191787	9.71208	0.649938	8.75251	1.02318e+06			9.66957	0.0130933	11.5103	187689	9.66487	0.0339261	11.3441	198236	9.66437	0.52419	10.337	405462
	9.72177	0.0466656	11.3884	191854	9.7205	0.659316	8.76093	1.01303e+06			9.67746	0.0130999	11.5188	187863	9.67277	0.0342187	11.3525	198687	9.67226	0.53607	10.3454	404983
	9.73018	0.0465852	11.3968	191906	9.72892	0.66843	8.76935	1.01211e+06			9.68536	0.0130725	11.5272	188018	9.68066	0.0345607	11.3609	198979	9.68016	0.547873	10.3539	404588
	9.7386	0.0465171	11.4052	191954	9.73733	0.677721	8.77776	1.0048e+06			9.69325	0.0130463	11.5356	188142	9.68856	0.0350018	11.3693	199322	9.68805	0.559894	10.3623	404190
	9.74702	0.0464551	11.4136	192088	9.74575	0.686964	8.78618	992876			9.70115	0.0130458	11.544	188295	9.69645	0.0352448	11.3777	199740	9.69595	0.572079	10.3707	403724
	9.75543	0.046398	11.4221	192141	9.75417	0.696233	8.7946	984790			9.70904	0.0130568	11.5524	188455	9.70435	0.0357861	11.3861	199957	9.70384	0.58363	10.3791	403325
	9.76385	0.0463366	11.4305	192095	9.76259	0.705999	8.80302	978104			9.71694	0.0131243	11.5608	188337	9.71224	0.035935	11.3946	200353	9.71174	0.595792	10.3875	402877
	9.77227	0.0462297	11.4389	192111	9.771	0.715735	8.81143	969117			9.72483	0.0131616	11.5693	187982	9.72014	0.0360149	11.403	200657	9.71963	0.607863	10.3959	402280
	9.78069	0.0461042	11.4473	192253	9.77942	0.72497	8.81985	960113			9.73273	0.0131488	11.5777	187903	9.72803	0.0359905	11.4114	200776	9.72753	0.619864	10.4044	401752
	9.7891	0.0459538	11.4557	192317	9.78784	0.734214	8.82827	949848			9.74062	0.0131361	11.5861	188062	9.73593	0.0359661	11.4198	200707	9.73542	0.632106	10.4128	401100
	9.79752	0.0457971	11.4641	192326	9.79625	0.743434	8.83668	945991			9.74852	0.0132002	11.5945	188212	9.74382	0.0361581	11.4282	200870	9.74332	0.643763	10.4212	400631
	9.80594	0.0456521	11.4726	192362	9.80467	0.752565	8.8451	942662			9.75641	0.0132148	11.6029	188413	9.75172	0.0362152	11.4366	201115	9.75122	0.65595	10.4296	399948
	9.81436	0.0454658	11.481	192421	9.81309	0.761528	8.85352	935722			9.76431	0.0131977	11.6114	188580	9.75961	0.0369312	11.4451	201109	9.75911	0.668021	10.438	399031
	9.82277	0.0452933	11.4894	192448	9.82151	0.770506	8.86194	933121			9.7722	0.0131805	11.6198	188768	9.76751	0.0370547	11.4535	201136	9.76701	0.679625	10.4464	398237
	9.83119	0.045142	11.4978	192335	9.82992	0.779491	8.87035	929536			9.7801	0.0131081	11.6282	189027	9.7754	0.037108	11.4619	201280	9.7749	0.691163	10.4549	397466
	9.83961	0.0450105	11.5062	192282	9.83834	0.788571	8.87877	918733			9.78799	0.0131275	11.6366	189210	9.7833	0.0369723	11.4703	201359	9.7828	0.702709	10.4633	396699
	9.84803	0.0448911	11.5146	192363	9.84676	0.79717	8.88719	907265			9.79589	0.0131469	11.645	189400	9.79119	0.0368366	11.4787	201426	9.79069	0.714243	10.4717	395770
	9.85644	0.0447497	11.5231	192449	9.85518	0.805584	8.89561	903067			9.80378	0.0131557	11.6534	189542	9.79909	0.0373314	11.4871	201572	9.79859	0.72519	10.4801	394655
	9.86486	0.0445916	11.5315	192471	9.86359	0.81393	8.90402	898206			9.81168	0.0131646	11.6619	189843	9.80698	0.037519	11.4956	201742	9.80648	0.736268	10.4885	393603
	9.87328	0.044449	11.5399	192418	9.87201	0.822214	8.91244	891816			9.81957	0.0132037			9.81488	0.0376806	11.504	201713	9.81438	0.747525	10.4969	392529
	9.88169	0.0443192	11.5483	192300	9.88043	0.830456	8.92086	887495			9.82747	0.0132428			9.82277	0.038321	11.5124	201795	9.82227	0.758427	10.5054	391272
	9.89011	0.0441949	11.5567	192307	9.88884	0.838716	8.92927	882398			9.83536	0.0132695			9.83067	0.0385712	11.5208	202064	9.83017	0.769436	10.5138	389900
	9.89853	0.0441055	11.5651	192421	9.89726	0.846786	8.93769	875475			9.84326	0.0132716			9.83856	0.0386808	11.5292	202419	9.83806	0.779802	10.5222	388036
	9.90695	0.0440458	11.5736	192899	9.90568	0.854555	8.94611	869252			9.85116	0.0132737			9.84646	0.0387903	11.5377	202361	9.84596	0.790702	10.5306	386101
	9.91536	0.0440014	11.582	193051	9.9141	0.862059	8.95453	863057			9.85905	0.0132397			9.85436	0.0388275	11.5461	202451	9.85385	0.800637	10.539	384543
	9.92378	0.0439652	11.5904	193071	9.92251	0.869525	8.96294	858449			9.86695	0.0132059			9.86225	0.0388596	11.5545	202627	9.86175	0.808835	10.5475	383335
	9.9322	0.0439304	11.5988	193152	9.93093	0.877017	8.97136	851434			9.87484	0.0131721			9.87015	0.0388917	11.5629	202728	9.86964	0.816825	10.5559	382213
	9.94062	0.0438624	11.6072	193129	9.93935	0.883989	8.97978	844000			9.88274	0.0131752			9.87804	0.0391967	11.5713	202950	9.87754	0.826245	10.5643	380849
	9.94903	0.043764			9.94777	0.890826	8.9882	836132			9.89063	0.0131418			9.88594	0.0397705	11.5797	203072	9.88543	0.835937	10.5727	379661
	9.95745	0.0436389			9.95618	0.897622	8.99661	829415			9.89853	0.0131466			9.89383	0.0397558			9.89333	0.845125	10.5811	378204
	9.96587	0.0435967			9.9646	0.904203	9.00503	824624			9.90642	0.0133753			9.90173	0.0397411			9.90122	0.854285	10.5895	376873
	9.97428	0.0435811			9.97302	0.910711	9.01345	814485			9.91432	0.0134754			9.90962	0.0396387			9.90912	0.863405	10.598	375537
	9.9827	0.0435738			9.98143	0.917056	9.02187	805903			9.92221	0.0134929			9.91752	0.0398483			9.91701	0.872296	10.6064	374095
	9.99112	0.0435419			9.98985	0.923228	9.03028	800159			9.93011	0.0135104			9.92541	0.0406479			9.92491	0.88037	10.6148	372584
	9.99954	0.0434886			9.99827	0.92905	9.0387	799250			9.938	0.0136308			9.93331	0.0408824			9.9328	0.88853	10.6232	370928
	10.008	0.0434224			10.0067	0.934793	9.04712	796697			9.9459	0.0136692			9.9412	0.0411033			9.9407	0.896446	10.6316	369236
	10.0164	0.0433661			10.0151	0.940257	9.05553	788889			9.95379	0.0137494			9.9491	0.0413956			9.94859	0.903929	10.64	367556
	10.0248	0.0433644			10.0235	0.945457	9.06395	783454			9.96169	0.0137848			9.95699	0.0414594			9.95649	0.911631	10.6485	365958
	10.0332	0.0433864			10.0319	0.950429	9.07237	781262			9.96958	0.0137376			9.96489	0.0419733			9.96438	0.918694	10.6569	364408
	10.0416	0.0434279			10.0404	0.955091	9.08079	775499			9.97748	0.0136905			9.97278	0.0425536			9.97228	0.925485	10.6653	362874
	10.05	0.0434769			10.0488	0.959438	9.0892	766241			9.98537	0.0140164			9.98068	0.0429198			9.98017	0.931643	10.6737	361220
	10.0585	0.0435942			10.0572	0.963559	9.09762	762019			9.99327	0.0140376			9.98857	0.0430925			9.98807	0.93762	10.6821	359475
	10.0669	0.0437404			10.0656	0.967537	9.10604	757713			10.0012	0.0140597			9.99647	0.0432652			9.99597	0.943312	10.6905	357834
	10.0753	0.0438757			10.074	0.971381	9.11446	752155			10.0091	0.0141345			10.0044	0.0434392			10.0039	0.948746	10.699	356037
	10.0837	0.0440064			10.0824	0.975149	9.12287	746431			10.017	0.0141425			10.0123	0.0444509			10.0118	0.954738	10.7074	354305
	10.0921	0.0441935			10.0909	0.978502	9.13129	741878			10.0248	0.0141505			10.0202	0.0446945			10.0197	0.960405	10.7158	352631
	10.1005	0.0444549			10.0993	0.98156	9.13971	739638			10.0327	0.0143623			10.028	0.0455552			10.0275	0.964566	10.7242	350839
	10.109	0.0447349			10.1077	0.98453	9.14812	732758			10.0406	0.0144747			10.0359	0.0460388			10.0354	0.968807	10.7326	349057
	10.1174	0.0450353			10.1161	0.987253	9.15654	726968			10.0485	0.0147092			10.0438	0.0460931			10.0433	0.973233	10.741	347381
	10.1258	0.0453945			10.1245	0.989603	9.16496	721816			10.0564	0.0148965			10.0517	0.0466524			10.0512	0.977186	10.7495	345905
	10.1342	0.0458063			10.1329	0.99163	9.17338	715276			10.0643	0.0151885			10.0596	0.0468505			10.0591	0.980338	10.7579	344517
	10.1426	0.0462401			10.1414	0.993439	9.18179	710716			10.0722	0.0153056			10.0675	0.0470486			10.067	0.983588	10.7663	343344
	10.151	0.0467237			10.1498	0.995055	9.19021	704515			10.0801	0.0154844			10.0754	0.0475937			10.0749	0.986901	10.7747	342267
	10.1595	0.0472059			10.1582	0.996485	9.19863	698880			10.088	0.0158951			10.0833	0.0482411			10.0828	0.989206	10.7831	341225
	10.1679	0.0477423			10.1666	0.997662	9.20705	693943			10.0959	0.0161097			10.0912	0.0491437			10.0907	0.991322	10.7916	340064
	10.1763	0.0482965			10.175	0.998597	9.21546	690630			10.1038	0.0162259			10.0991	0.049747			10.0986	0.993324	10.8	338839
	10.1847	0.0488667			10.1834	0.99913	9.22388	689768			10.1117	0.0164033			10.107	0.0503			10.1065	0.995089	10.8084	337663
	10.1931	0.0494619			10.1919	0.999548	9.2323	686927			10.1196	0.0166158			10.1149	0.0511757			10.1144	0.996607	10.8168	336442
	10.2016	0.0501661			10.2003	0.999901	9.24071	681278			10.1275	0.016926			10.1228	0.0513707			10.1223	0.997977	10.8252	335156
	10.21	0.050906			10.2087	1	9.24913	676101			10.1354	0.0172215			10.1307	0.0522887			10.1302	0.998921	10.8336	333809
	10.2184	0.0517218			10.2171	0.999635	9.25755	672089			10.1433	0.0175283			10.1386	0.053063			10.1381	0.999505	10.8421	332283
	10.2268	0.0525949			10.2255	0.998871	9.26597	665650			10.1512	0.0179038			10.1465	0.0535989			10.146	0.999874	10.8505	330571
	10.2352	0.0535028			10.234	0.997876	9.27438	657745			10.1591	0.0184476			10.1544	0.0554819			10.1539	0.999959	10.8589	328498
	10.2436	0.054523			10.2424	0.996717	9.2828	652127			10.167	0.0187881			10.1623	0.0571968			10.1618	1	10.8673	326410
	10.2521	0.0556179			10.2508	0.995266	9.29122	649288			10.1749	0.0191577			10.1702	0.057754			10.1697	0.99968	10.8757	324253
	10.2605	0.0568118			10.2592	0.993665	9.29964	644873			10.1828	0.0195782			10.1781	0.058457			10.1776	0.999359	10.8841	322076
	10.2689	0.0581519			10.2676	0.99193	9.30805	639918			10.1906	0.019921			10.186	0.0596032			10.1854	0.998135	10.8926	319687
	10.2773	0.0596003			10.276	0.989943	9.31647	635447			10.1985	0.0204865			10.1938	0.0605894			10.1933	0.996861	10.901	317147
	10.2857	0.0610779			10.2845	0.987669	9.32489	631195			10.2064	0.0209599			10.2017	0.0621206			10.2012	0.995059	10.9094	314685
	10.2941	0.0626399			10.2929	0.985439	9.3333	626682			10.2143	0.0213172			10.2096	0.0640834			10.2091	0.993229	10.9178	312506
	10.3026	0.0644593			10.3013	0.983317	9.34172	623588			10.2222	0.0219971			10.2175	0.0653563			10.217	0.991795	10.9262	310228
	10.311	0.0664366			10.3097	0.980538	9.35014	619655			10.2301	0.0228664			10.2254	0.0668027			10.2249	0.989897	10.9346	307749
	10.3194	0.0684718			10.3181	0.977429	9.35856	614237			10.238	0.0235325			10.2333	0.0684992			10.2328	0.987384	10.9431	305575
	10.3278	0.0705441			10.3265	0.974055	9.36697	608968			10.2459	0.0242981			10.2412	0.0700255			10.2407	0.984631	10.9515	303517
	10.3362	0.0727414			10.335	0.970632	9.37539	604973			10.2538	0.0251587			10.2491	0.0721237			10.2486	0.982063	10.9599	301391
	10.3446	0.0750928			10.3434	0.967147	9.38381	599880			10.2617	0.0257225			10.257	0.0743739			10.2565	0.979076	10.9683	299233
	10.3531	0.0776767			10.3518	0.963514	9.39223	596590			10.2696	0.0266707			10.2649	0.0771921			10.2644	0.975899	10.9767	297174
	10.3615	0.0805233			10.3602	0.959556	9.40064	594158			10.2775	0.0275556			10.2728	0.0798406			10.2723	0.972561	10.9851	295389
	10.3699	0.0834144			10.3686	0.955401	9.40906	590178			10.2854	0.0285368			10.2807	0.0819606			10.2802	0.96936	10.9936	293715
	10.3783	0.0864851			10.377	0.95105	9.41748	586203			10.2933	0.0297578			10.2886	0.0847133			10.2881	0.965703	11.002	291981
	10.3867	0.0897151			10.3855	0.946632	9.42589	582407			10.3012	0.0307747			10.2965	0.0877595			10.296	0.961482	11.0104	290491
	10.3951	0.093152			10.3939	0.94219	9.43431	578347			10.3091	0.0317638			10.3044	0.0904712			10.3039	0.956631	11.0188	289039
	10.4036	0.0966814			10.4023	0.937499	9.44273	575007			10.317	0.032855			10.3123	0.0938412			10.3118	0.95222	11.0272	287403
	10.412	0.100493			10.4107	0.93249	9.45115	573114			10.3249	0.0343965			10.3202	0.0971899			10.3197	0.947979	11.0357	286021
	10.4204	0.104617			10.4191	0.927515	9.45956	571205			10.3328	0.0358736			10.3281	0.100958			10.3276	0.943215	11.0441	284751
	10.4288	0.109086			10.4276	0.922402	9.46798	567040			10.3407	0.0373164			10.336	0.105004			10.3355	0.938412	11.0525	283390
	10.4372	0.11374			10.436	0.917266	9.4764	563046			10.3485	0.0390554			10.3439	0.10875			10.3434	0.933876	11.0609	281835
	10.4457	0.118484			10.4444	0.912232	9.48482	559957			10.3564	0.040782			10.3517	0.113516			10.3512	0.929046	11.0693	280655
	10.4541	0.123551			10.4528	0.907101	9.49323	556665			10.3643	0.043154			10.3596	0.117752			10.3591	0.923854	11.0777	279602
	10.4625	0.128872			10.4612	0.901448	9.50165	553989			10.3722	0.0458715			10.3675	0.12239			10.367	0.918937	11.0862	278348
	10.4709	0.134501			10.4696	0.895766	9.51007	551397			10.3801	0.0479129			10.3754	0.127521			10.3749	0.913589	11.0946	276933
	10.4793	0.140338			10.4781	0.890184	9.51848	548344			10.388	0.0491363			10.3833	0.132808			10.3828	0.908113	11.103	275422
	10.4877	0.146483			10.4865	0.884568	9.5269	545762			10.3959	0.0510126			10.3912	0.137861			10.3907	0.902634	11.1114	274189
	10.4962	0.153048			10.4949	0.879072	9.53532	543632			10.4038	0.0537205			10.3991	0.143136			10.3986	0.89739	11.1198	273129
	10.5046	0.159807			10.5033	0.87321	9.54374	540440			10.4117	0.0560917			10.407	0.149577			10.4065	0.891552	11.1282	272179
	10.513	0.166995			10.5117	0.867109	9.55215	537092			10.4196	0.0586185			10.4149	0.155775			10.4144	0.886095	11.1367	271120
	10.5214	0.174349			10.5201	0.860907	9.56057	534606			10.4275	0.0616002			10.4228	0.161384			10.4223	0.879858	11.1451	270026
	10.5298	0.181983			10.5286	0.854762	9.56899	533278			10.4354	0.0648391			10.4307	0.168089			10.4302	0.874146	11.1535	268958
	10.5382	0.19001			10.537	0.848572	9.57741	530655			10.4433	0.068034			10.4386	0.175332			10.4381	0.868733	11.1619	267799
	10.5467	0.198542			10.5454	0.842365	9.58582	527103			10.4512	0.0712961			10.4465	0.182769			10.446	0.862939	11.1703	266869
	10.5551	0.207422			10.5538	0.836161	9.59424	524262			10.4591	0.0747592			10.4544	0.190511			10.4539	0.857012	11.1787	266078
	10.5635	0.216336			10.5622	0.829971	9.60266	521320			10.467	0.0785534			10.4623	0.199676			10.4618	0.850942	11.1872	265306
	10.5719	0.225679			10.5706	0.82369	9.61107	518533			10.4749	0.0825369			10.4702	0.207988			10.4697	0.845049	11.1956	264435
	10.5803	0.235447			10.5791	0.817526	9.61949	516357			10.4828	0.0864952			10.4781	0.216667			10.4776	0.83958	11.204	262144
	10.5887	0.245518			10.5875	0.811521	9.62791	514555			10.4907	0.0907833			10.486	0.225192			10.4855	0.834049	11.2124	261351
	10.5972	0.25594			10.5959	0.805632	9.63633	512336			10.4986	0.0953353			10.4939	0.234567			10.4934	0.828119	11.2208	261808
	10.6056	0.266686			10.6043	0.799732	9.64474	509705			10.5065	0.100196			10.5018	0.244628			10.5013	0.822753	11.2292	260963
	10.614	0.277768			10.6127	0.793468	9.65316	507473			10.5143	0.105219			10.5097	0.254853			10.5092	0.817367	11.2377	260117
	10.6224	0.289171			10.6211	0.787336	9.66158	505503			10.5222	0.110659			10.5175	0.264854			10.517	0.812328	11.2461	259355
	10.6308	0.300901			10.6296	0.781295	9.67	503562			10.5301	0.116323			10.5254	0.275281			10.5249	0.808544	11.2545	258667
	10.6392	0.312929			10.638	0.775313	9.67841	501811			10.538	0.121974			10.5333	0.286248			10.5328	0.804186	11.2629	258154
	10.6477	0.325312			10.6464	0.769186	9.68683	499980			10.5459	0.127867			10.5412	0.297184			10.5407	0.799043	11.2713	258114
	10.6561	0.337987			10.6548	0.762913	9.69525	497844			10.5538	0.134071			10.5491	0.30885			10.5486	0.793277	11.2798	257772
	10.6645	0.351033			10.6632	0.756611	9.70366	496239			10.5617	0.140504			10.557	0.32111			10.5565	0.787451	11.2882	256507
	10.6729	0.364382			10.6717	0.75035	9.71208	494322			10.5696	0.147324			10.5649	0.33331			10.5644	0.782137	11.2966	255662
	10.6813	0.378036			10.6801	0.744212	9.7205	492394			10.5775	0.154317			10.5728	0.345986			10.5723	0.776409	11.305	255072
	10.6898	0.392003			10.6885	0.738091	9.72892	490439			10.5854	0.161773			10.5807	0.357972			10.5802	0.771271	11.3134	254780
	10.6982	0.406216			10.6969	0.732228	9.73733	488577			10.5933	0.169495			10.5886	0.370836			10.5881	0.765885	11.3218	254257
	10.7066	0.420796			10.7053	0.726514	9.74575	486833			10.6012	0.177225			10.5965	0.384478			10.596	0.760463	11.3303	254037
	10.715	0.435381			10.7137	0.720505	9.75417	485265			10.6091	0.18554			10.6044	0.39828			10.6039	0.755313	11.3387	253586
	10.7234	0.450225			10.7222	0.714608	9.76259	484268			10.617	0.193844			10.6123	0.411827			10.6118	0.750227	11.3471	253159
	10.7318	0.465245			10.7306	0.708816	9.771	482765			10.6249	0.202953			10.6202	0.425285			10.6197	0.745473	11.3555	252948
	10.7403	0.480501			10.739	0.703086	9.77942	481204			10.6328	0.21178			10.6281	0.440037			10.6276	0.740932	11.3639	252509
	10.7487	0.495961			10.7474	0.69729	9.78784	479852			10.6407	0.221338			10.636	0.454471			10.6355	0.736335	11.3723	252184
	10.7571	0.511613			10.7558	0.691358	9.79625	478776			10.6486	0.231372			10.6439	0.469573			10.6434	0.731804	11.3808	252021
	10.7655	0.5274			10.7642	0.685656	9.80467	477500			10.6565	0.241411			10.6518	0.484397			10.6513	0.727017	11.3892	251711
	10.7739	0.543304			10.7727	0.680138	9.81309	476086			10.6644	0.251568			10.6597	0.498672			10.6592	0.722283	11.3976	251409
	10.7823	0.559248			10.7811	0.674545	9.82151	474859			10.6722	0.261673			10.6676	0.513427			10.6671	0.717518
	10.7908	0.575322			10.7895	0.668995	9.82992	473664			10.6801	0.271426			10.6754	0.529373			10.6749	0.713078
	10.7992	0.591551			10.7979	0.663528	9.83834	472518			10.688	0.282029			10.6833	0.544296			10.6828	0.708791
	10.8076	0.607538			10.8063	0.658079	9.84676	470888			10.6959	0.293484			10.6912	0.56029			10.6907	0.704312
	10.816	0.623592			10.8147	0.652701	9.85518	469454			10.7038	0.305334			10.6991	0.575871			10.6986	0.700198
	10.8244	0.639627			10.8232	0.647462	9.86359	468221			10.7117	0.317309			10.707	0.590894			10.7065	0.696034
	10.8328	0.655514			10.8316	0.642073	9.87201	466952			10.7196	0.329486			10.7149	0.606858			10.7144	0.691788
	10.8413	0.67147			10.84	0.636809	9.88043	465666			10.7275	0.342079			10.7228	0.622365			10.7223	0.687922
	10.8497	0.687092			10.8484	0.631551	9.88884	464115			10.7354	0.354795			10.7307	0.637465			10.7302	0.684179
	10.8581	0.702605			10.8568	0.626481	9.89726	463245			10.7433	0.367961			10.7386	0.652873			10.7381	0.6806
	10.8665	0.717929			10.8652	0.621448	9.90568	462442			10.7512	0.381613			10.7465	0.667988			10.746	0.676686
	10.8749	0.733079			10.8737	0.616629	9.9141	461268			10.7591	0.394864			10.7544	0.68293			10.7539	0.672964
	10.8834	0.748131			10.8821	0.612098	9.92251	459954			10.767	0.408642			10.7623	0.697703			10.7618	0.66919
	10.8918	0.763027			10.8905	0.607314	9.93093	458686			10.7749	0.422886			10.7702	0.713375			10.7697	0.665209
	10.9002	0.777437			10.8989	0.602399	9.93935	457272			10.7828	0.437043			10.7781	0.727963			10.7776	0.661503
	10.9086	0.791508			10.9073	0.597399	9.94777	456104			10.7907	0.45158			10.786	0.741597			10.7855	0.657837
	10.917	0.805277			10.9158	0.592416	9.95618	454987			10.7986	0.466194			10.7939	0.755728			10.7934	0.654647
	10.9254	0.818771			10.9242	0.587349	9.9646	453961			10.8065	0.481155			10.8018	0.77036			10.8013	0.651513
	10.9339	0.831995			10.9326	0.582454	9.97302	453254			10.8144	0.495937			10.8097	0.784035			10.8092	0.648226
	10.9423	0.84479			10.941	0.577537	9.98143	452542			10.8223	0.511116			10.8176	0.79714			10.8171	0.644922
	10.9507	0.85723			10.9494	0.572689	9.98985	451841			10.8302	0.526335			10.8255	0.810342			10.825	0.641539
	10.9591	0.869292			10.9578	0.567822	9.99827	450971			10.838	0.5412			10.8334	0.823038			10.8329	0.638002
	10.9675	0.880855			10.9663	0.563006	10.0067	449863			10.8459	0.55649			10.8412	0.833249			10.8407	0.634513
	10.9759	0.891909			10.9747	0.55817	10.0151	448839			10.8538	0.57061			10.8491	0.842383			10.8486	0.630919
	10.9844	0.902527			10.9831	0.55337	10.0235	447927			10.8617	0.584701			10.857	0.853332			10.8565	0.627895
	10.9928	0.912764			10.9915	0.548588	10.0319	446821			10.8696	0.599987			10.8649	0.864708			10.8644	0.624591
	11.0012	0.922512			10.9999	0.544066	10.0404	445783			10.8775	0.615317			10.8728	0.875488			10.8723	0.621251
	11.0096	0.931736			11.0083	0.539665	10.0488	444599			10.8854	0.63088			10.8807	0.885823			10.8802	0.617805
	11.018	0.940467			11.0168	0.535002	10.0572	443785			10.8933	0.645897			10.8886	0.896085			10.8881	0.614283
	11.0264	0.948627			11.0252	0.530011	10.0656	442933			10.9012	0.661428			10.8965	0.906468			10.896	0.611397
	11.0349	0.956118			11.0336	0.525254	10.074	442046			10.9091	0.676714			10.9044	0.91575			10.9039	0.608397
	11.0433	0.963028			11.042	0.520617	10.0824	441032			10.917	0.691753			10.9123	0.924828			10.9118	0.605252
	11.0517	0.969392			11.0504	0.515767	10.0909	440114			10.9249	0.706576			10.9202	0.933465			10.9197	0.601504
	11.0601	0.975124			11.0588	0.510991	10.0993	439401			10.9328	0.721132			10.9281	0.941996			10.9276	0.598275
	11.0685	0.980295			11.0673	0.506679	10.1077	438815			10.9407	0.735981			10.936	0.948947			10.9355	0.595418
	11.0769	0.984891			11.0757	0.502228	10.1161	438056			10.9486	0.750396			10.9439	0.955362			10.9434	0.591964
	11.0854	0.988874			11.0841	0.497189	10.1245	437117			10.9565	0.764235			10.9518	0.961495			10.9513	0.588431
	11.0938	0.992305			11.0925	0.492183	10.1329	436331			10.9644	0.778153			10.9597	0.967874			10.9592	0.585098
	11.1022	0.995137			11.1009	0.487194	10.1414	435480			10.9723	0.791655			10.9676	0.973483			10.9671	0.581923
	11.1106	0.997225			11.1094	0.482146	10.1498	434582			10.9802	0.804835			10.9755	0.977975			10.975	0.578732
	11.119	0.998706			11.1178	0.477062	10.1582	433795			10.9881	0.818131			10.9834	0.982742			10.9829	0.575129
	11.1275	0.999592			11.1262	0.471829	10.1666	433139			10.9959	0.830576			10.9913	0.987381			10.9908	0.571161
	11.1359	1			11.1346	0.466691	10.175	432423			11.0038	0.843319			10.9991	0.990513			10.9987	0.567589
	11.1443	0.999788			11.143	0.461629	10.1834	431432			11.0117	0.855494			11.007	0.993579			11.0065	0.563791
	11.1527	0.998943			11.1514	0.456425	10.1919	430467			11.0196	0.867186			11.0149	0.99674			11.0144	0.559448
	11.1611	0.997545			11.1599	0.451234	10.2003	429659			11.0275	0.878086			11.0228	0.998261			11.0223	0.555636
	11.1695	0.99576			11.1683	0.445956	10.2087	428876			11.0354	0.888491			11.0307	0.999412			11.0302	0.552022
	11.178	0.993348			11.1767	0.440793	10.2171	428082			11.0433	0.899111			11.0386	0.999833			11.0381	0.547611
	11.1864	0.990315			11.1851	0.435422	10.2255	426976			11.0512	0.909067			11.0465	1			11.046	0.543337
	11.1948	0.986763			11.1935	0.430046	10.234	426048			11.0591	0.918473			11.0544	0.999706			11.0539	0.539232
	11.2032	0.982555			11.2019	0.42461	10.2424	425204			11.067	0.927333			11.0623	0.999412			11.0618	0.535483
	11.2116	0.977962			11.2104	0.419279	10.2508	424372			11.0749	0.935746			11.0702	0.997979			11.0697	0.530893
	11.22	0.972839			11.2188	0.414233	10.2592	423551			11.0828	0.943879			11.0781	0.9961			11.0776	0.526129
	11.2285	0.967345			11.2272	0.409146	10.2676	422683			11.0907	0.951293			11.086	0.994631			11.0855	0.521681
	11.2369	0.96126			11.2356	0.403744	10.276	421907			11.0986	0.958558			11.0939	0.99269			11.0934	0.517455
	11.2453	0.954749			11.244	0.398058	10.2845	420962			11.1065	0.96518			11.1018	0.989616			11.1013	0.513504
	11.2537	0.94782			11.2524	0.392375	10.2929	420191			11.1144	0.971093			11.1097	0.986069			11.1092	0.509008
	11.2621	0.940372			11.2609	0.386803	10.3013	419420			11.1223	0.976667			11.1176	0.981799			11.1171	0.504177
	11.2705	0.932483			11.2693	0.381176	10.3097	418714			11.1302	0.981677			11.1255	0.977289			11.125	0.499093
	11.279	0.924376			11.2777	0.37553	10.3181	417802			11.1381	0.985927			11.1334	0.971633			11.1329	0.493917
	11.2874	0.915928			11.2861	0.369977	10.3265	416823			11.146	0.989833			11.1413	0.96573			11.1408	0.489252
	11.2958	0.907107			11.2945	0.364347	10.335	415668			11.1539	0.992989			11.1492	0.960744			11.1487	0.484138
	11.3042	0.8978			11.3029	0.358735	10.3434	414613			11.1617	0.995703			11.1571	0.954529			11.1566	0.479323
	11.3126	0.888192			11.3114	0.353131	10.3518	413932			11.1696	0.997744			11.1649	0.947944			11.1644	0.474538
	11.321	0.878582			11.3198	0.34746	10.3602	412998			11.1775	0.999195			11.1728	0.941494			11.1723	0.469187
	11.3295	0.868494			11.3282	0.341912	10.3686	411969			11.1854	1			11.1807	0.933836			11.1802	0.463757
	11.3379	0.858054			11.3366	0.33638	10.377	410986			11.1933	0.999929			11.1886	0.925765			11.1881	0.458309
	11.3463	0.847388			11.345	0.330888	10.3855	409886			11.2012	0.999858			11.1965	0.918491			11.196	0.453036
	11.3547	0.836596			11.3535	0.325243	10.3939	408937			11.2091	0.999629			11.2044	0.910925			11.2039	0.45015
	11.3631	0.825587			11.3619	0.319582	10.4023	407870			11.217	0.998294			11.2123	0.902131			11.2118	0.444856
	11.3716	0.814187			11.3703	0.313928	10.4107	406444			11.2249	0.996481			11.2202	0.892839			11.2197	0.437094
	11.38	0.802674			11.3787	0.308364	10.4191	405312			11.2328	0.994067			11.2281	0.884127			11.2276	0.431686
	11.3884	0.791086			11.3871	0.302728	10.4276	404239			11.2407	0.990991			11.236	0.8747			11.2355	0.426299
	11.3968	0.779301			11.3955	0.297077	10.436	403070			11.2486	0.98768			11.2439	0.864534			11.2434	0.420784
	11.4052	0.767515			11.404	0.29157	10.4444	402185			11.2565	0.984073			11.2518	0.855143			11.2513	0.415114
	11.4136	0.755726			11.4124	0.286022	10.4528	401444			11.2644	0.979611			11.2597	0.846329			11.2592	0.409398
	11.4221	0.743615			11.4208	0.280518	10.4612	400139			11.2723	0.974433			11.2676	0.838749			11.2671	0.403148
	11.4305	0.731562			11.4292	0.274975	10.4696	398756			11.2802	0.969073			11.2755	0.830566			11.275	0.396137
	11.4389	0.719203			11.4376	0.269565	10.4781	397543			11.2881	0.963301			11.2834	0.820368			11.2829	0.390606
	11.4473	0.706958			11.446	0.264142	10.4865	396547			11.296	0.957005			11.2913	0.809491			11.2908	0.386169
	11.4557	0.694625			11.4545	0.25881	10.4949	395517			11.3039	0.950202			11.2992	0.798764			11.2987	0.380285
	11.4641	0.682098			11.4629	0.253582	10.5033	394259			11.3118	0.943194			11.3071	0.788002			11.3066	0.37455
	11.4726	0.669458			11.4713	0.248271	10.5117	392980			11.3197	0.935598			11.315	0.776717			11.3145	0.368309
	11.481	0.656841			11.4797	0.243109	10.5201	391501			11.3275	0.927694			11.3229	0.765294			11.3224	0.362582
	11.4894	0.644277			11.4881	0.237824	10.5286	389873			11.3354	0.919256			11.3307	0.754098			11.3302	0.356405
	11.4978	0.631708			11.4965	0.232747	10.537	388509			11.3433	0.910159			11.3386	0.743086			11.3381	0.350607
	11.5062	0.61932			11.505	0.227639	10.5454	387215			11.3512	0.901054			11.3465	0.731336			11.346	0.34487
	11.5146	0.606875			11.5134	0.222699	10.5538	385610			11.3591	0.891805			11.3544	0.719599			11.3539	0.338789
	11.5231	0.594572			11.5218	0.217882	10.5622	384194			11.367	0.882168			11.3623	0.708427			11.3618	0.33311
	11.5315	0.582315			11.5302	0.213028	10.5706	382688			11.3749	0.872093			11.3702	0.696723			11.3697	0.327435
	11.5399	0.570214			11.5386	0.208251	10.5791	381191			11.3828	0.861629			11.3781	0.684675			11.3776	0.321412
	11.5483	0.558136			11.547	0.203474	10.5875	379757			11.3907	0.851473			11.386	0.67319			11.3855	0.315607
	11.5567	0.546187			11.5555	0.198751	10.5959	378528			11.3986	0.840504			11.3939	0.660937			11.3934	0.309973
	11.5651	0.534275			11.5639	0.194101	10.6043	377270			11.4065	0.828932			11.4018	0.648804			11.4013	0.304192
	11.5736	0.522773			11.5723	0.189446	10.6127	375491			11.4144	0.817838			11.4097	0.637005			11.4092	0.298185
	11.582	0.511209			11.5807	0.184802	10.6211	373894			11.4223	0.806038			11.4176	0.625992			11.4171	0.292513
	11.5904	0.499633			11.5891	0.18033	10.6296	372512			11.4302	0.794192			11.4255	0.614331			11.425	0.286949
	11.5988	0.488194			11.5976	0.176032	10.638	370934			11.4381	0.782421			11.4334	0.601889			11.4329	0.281473
	11.6072	0.476895			11.606	0.171653	10.6464	369316			11.446	0.770558			11.4413	0.590217			11.4408	0.276343
	11.6157	0.465738			11.6144	0.167309	10.6548	367649			11.4539	0.758073			11.4492	0.579124			11.4487	0.27082
	11.6241	0.454808			11.6228	0.163198	10.6632	365865			11.4618	0.745467			11.4571	0.567343			11.4566	0.265399
	11.6325	0.444197			11.6312	0.159097	10.6717	364078			11.4697	0.732928			11.465	0.555769			11.4645	0.259863
	11.6409	0.433656			11.6396	0.155108	10.6801	362125			11.4776	0.720507			11.4729	0.544512			11.4724	0.25494
	11.6493	0.423204			11.6481	0.151245	10.6885	360078			11.4854	0.70758			11.4808	0.533314			11.4803	0.250068
	11.6577	0.412946			11.6565	0.147498	10.6969	358313			11.4933	0.694796			11.4886	0.522023			11.4882	0.244945
	11.6662	0.4029			11.6649	0.143631	10.7053	356715			11.5012	0.682139			11.4965	0.510874			11.496	0.239666
	11.6746	0.392992			11.6733	0.139871	10.7137	354658			11.5091	0.668851			11.5044	0.500395			11.5039	0.234643
	11.683	0.3832			11.6817	0.136222	10.7222	352545			11.517	0.655754			11.5123	0.489707			11.5118	0.229875
	11.6914	0.373713			11.6901	0.132664	10.7306	350904			11.5249	0.642669			11.5202	0.478769			11.5197	0.2247
	11.6998	0.364536			11.6986	0.129222	10.739	349070			11.5328	0.629711			11.5281	0.467627			11.5276	0.219631
	11.7082	0.355377			11.707	0.125913	10.7474	346935			11.5407	0.616744			11.536	0.457719			11.5355	0.21523
	11.7167	0.346241			11.7154	0.122632	10.7558	344764			11.5486	0.603593			11.5439	0.447675			11.5434	0.210816
	11.7251	0.337272			11.7238	0.119337	10.7642	342642			11.5565	0.590707			11.5518	0.437372			11.5513	0.205766
	11.7335	0.328531			11.7322	0.116166	10.7727	340562			11.5644	0.57921			11.5597	0.427611			11.5592	0.201212
	11.7419	0.320031			11.7406	0.113074	10.7811	338525			11.5723	0.567783			11.5676	0.417708			11.5671	0.19689
	11.7503	0.311666			11.7491	0.109974	10.7895	336578			11.5802	0.555156			11.5755	0.407856			11.575	0.192448
	11.7587	0.303643			11.7575	0.106985	10.7979	334583			11.5881	0.542332			11.5834	0.398684			11.5829	0.188242
	11.7672	0.295689			11.7659	0.104096	10.8063	332545			11.596	0.529789			11.5913	0.389238			11.5908	0.18416
	11.7756	0.287897			11.7743	0.101266	10.8147	330475			11.6039	0.517174			11.5992	0.379561			11.5987	0.180076
	11.784	0.280353			11.7827	0.0984967	10.8232	328458			11.6118	0.504844			11.6071	0.371207			11.6066	0.175882
	11.7924	0.273069			11.7911	0.0958747	10.8316	326326			11.6197	0.492596			11.615	0.362289			11.6145	0.17177
	11.8008	0.265876			11.7996	0.0933105	10.84	323990			11.6276	0.480307			11.6229	0.353321			11.6224	0.16787
	11.8093	0.258836			11.808	0.0907848	10.8484	321844			11.6355	0.468386			11.6308	0.344853			11.6303	0.164324
	11.8177	0.251969			11.8164	0.088334	10.8568	319920			11.6434	0.456535			11.6387	0.336664			11.6382	0.160418
	11.8261	0.245417			11.8248	0.0859306	10.8652	318023			11.6512	0.445127			11.6466	0.328164			11.6461	0.156838
	11.8345	0.238875			11.8332	0.0836704	10.8737	316204			11.6591	0.433373			11.6544	0.319561			11.6539	0.153265
	11.8429	0.232504			11.8417	0.0815875	10.8821	314418			11.667	0.421852			11.6623	0.311581			11.6618	0.149822
	11.8513	0.226297			11.8501	0.0794496	10.8905	312502			11.6749	0.410621			11.6702	0.30401			11.6697	0.146633
	11.8598	0.220207			11.8585	0.0773361	10.8989	310506			11.6828	0.399074			11.6781	0.296379			11.6776	0.143204
	11.8682	0.214329			11.8669	0.0753257	10.9073	308661			11.6907	0.388377			11.686	0.28915			11.6855	0.139839
	11.8766	0.208666			11.8753	0.0733925	10.9158	306664			11.6986	0.377443			11.6939	0.281701			11.6934	0.136912
	11.885	0.203077			11.8837	0.0715707	10.9242	304478			11.7065	0.366848			11.7018	0.274048			11.7013	0.134114
	11.8934	0.197777			11.8922	0.0697359	10.9326	302409			11.7144	0.356773			11.7097	0.267376			11.7092	0.130955
	11.9018	0.192612			11.9006	0.0679891	10.941	300514			11.7223	0.34642			11.7176	0.260556			11.7171	0.12801
	11.9103	0.187592			11.909	0.066224	10.9494	298634			11.7302	0.336521			11.7255	0.253431			11.725	0.125458
	11.9187	0.182659			11.9174	0.0645222	10.9578	296637			11.7381	0.326607			11.7334	0.24664			11.7329	0.122855
	11.9271	0.177873			11.9258	0.0628771	10.9663	294792			11.746	0.316783			11.7413	0.240765			11.7408	0.12025
	11.9355	0.173184			11.9342	0.061288	10.9747	293026			11.7539	0.307405			11.7492	0.235102			11.7487	0.117426
	11.9439	0.168777			11.9427	0.0598081	10.9831	291335			11.7618	0.298202			11.7571	0.228776			11.7566	0.115005
	11.9523	0.164512			11.9511	0.0584055	10.9915	289708			11.7697	0.289324			11.765	0.222626			11.7645	0.112619
	11.9608	0.160224			11.9595	0.0570423	10.9999	288245			11.7776	0.280478			11.7729	0.216341			11.7724	0.109984
	11.9692	0.156062			11.9679	0.0556922	11.0083	286931			11.7855	0.272657			11.7808	0.210796			11.7803	0.107202
	11.9776	0.151989			11.9763	0.0542566	11.0168	285706			11.7934	0.265131			11.7887	0.20519			11.7882	0.10499
	11.986	0.147973			11.9847	0.0528861	11.0252	283992			11.8013	0.257022			11.7966	0.19966			11.7961	0.103068
	11.9944	0.144145			11.9932	0.0515861	11.0336	282433			11.8091	0.248816			11.8045	0.19461			11.804	0.101088
	12.0028	0.140509			12.0016	0.050321	11.042	281018			11.817	0.240841			11.8123	0.189182			11.8119	0.0991661
	12.0113	0.136942			12.01	0.0491412	11.0504	279573			11.8249	0.233088			11.8202	0.184068			11.8197	0.0970076
	12.0197	0.133482			12.0184	0.0480823	11.0588	278214			11.8328	0.225702			11.8281	0.179501			11.8276	0.095202
	12.0281	0.130205			12.0268	0.0471465	11.0673	277096			11.8407	0.218505			11.836	0.174547			11.8355	0.0934969
	12.0365	0.127059			12.0353	0.046217	11.0757	276069			11.8486	0.21103			11.8439	0.169616			11.8434	0.091741
	12.0449	0.123944			12.0437	0.0452931	11.0841	274607			11.8565	0.203978			11.8518	0.165932			11.8513	0.0905252
	12.0534	0.12096			12.0521	0.0443754	11.0925	273314			11.8644	0.197267			11.8597	0.162159			11.8592	0.088658
	12.0618	0.118021			12.0605	0.0434426	11.1009	271868			11.8723	0.190652			11.8676	0.157945			11.8671	0.0870712
	12.0702	0.115178			12.0689	0.0424736	11.1094	270531			11.8802	0.184121			11.8755	0.154034			11.875	0.0858407
	12.0786	0.112496			12.0773	0.0415603	11.1178	269291			11.8881	0.177765			11.8834	0.150092			11.8829	0.0842767
	12.087	0.109946			12.0858	0.0407115	11.1262	267937			11.896	0.171969			11.8913	0.145659			11.8908	0.0829529
	12.0954	0.107437			12.0942	0.0399471	11.1346	266684			11.9039	0.165929			11.8992	0.142279			11.8987	0.0815563
	12.1039	0.104999			12.1026	0.0392639	11.143	265666			11.9118	0.15982			11.9071	0.139126			11.9066	0.0803159
	12.1123	0.102648			12.111	0.038608	11.1514	264725			11.9197	0.154374			11.915	0.135476			11.9145	0.0791607
	12.1207	0.100342			12.1194	0.0379408	11.1599	263862			11.9276	0.148994			11.9229	0.13195			11.9224	0.0777289
	12.1291	0.0982013			12.1278	0.0372787	11.1683	262779			11.9355	0.143645			11.9308	0.128527			11.9303	0.0765291
	12.1375	0.0961079			12.1363	0.0366692	11.1767	261783			11.9434	0.138533			11.9387	0.125648			11.9382	0.0758631
	12.1459	0.0940256			12.1447	0.036105	11.1851	260923			11.9513	0.133795			11.9466	0.122583			11.9461	0.0749105
	12.1544	0.091965			12.1531	0.0355649	11.1935	259809			11.9592	0.129033			11.9545	0.119004			11.954	0.0738964
	12.1628	0.0899642			12.1615	0.0350264					11.9671	0.124241			11.9624	0.115745			11.9619	0.0732743
	12.1712	0.0880269			12.1699	0.0344906					11.9749	0.119653			11.9703	0.11271			11.9698	0.0725127
	12.1796	0.0862383			12.1783	0.0339749					11.9828	0.115338			11.9781	0.109935			11.9777	0.0713698
	12.188	0.0845292			12.1868	0.033496					11.9907	0.110964			11.986	0.107511			11.9855	0.0704628
	12.1964	0.0827737			12.1952	0.0329632					11.9986	0.106839			11.9939	0.104735			11.9934	0.0696203
	12.2049	0.0810523			12.2036	0.0324485					12.0065	0.102956			12.0018	0.101969			12.0013	0.0683927
	12.2133	0.0793849			12.212	0.0319801					12.0144	0.0993764			12.0097	0.099678			12.0092	0.0679029
	12.2217	0.0778741			12.2204	0.0315502					12.0223	0.0959102			12.0176	0.0980053			12.0171	0.0674439
	12.2301	0.0764639			12.2288	0.031129					12.0302	0.0924585			12.0255	0.0960126			12.025	0.0669437
	12.2385	0.0750369			12.2373	0.0307287					12.0381	0.0890519			12.0334	0.0936521			12.0329	0.0661709
	12.2469	0.0736432			12.2457	0.0303678					12.046	0.0855296			12.0413	0.0915707			12.0408	0.0655081
	12.2554	0.072288			12.2541	0.0300413					12.0539	0.0822141			12.0492	0.0893518			12.0487	0.0646601
	12.2638	0.0709861			12.2625	0.0297337					12.0618	0.0791727			12.0571	0.0872498			12.0566	0.0641481
	12.2722	0.0697484			12.2709	0.0294062					12.0697	0.0763374			12.065	0.0852687			12.0645	0.063779
	12.2806	0.0686182			12.2794	0.0290785					12.0776	0.0735831			12.0729	0.0834833			12.0724	0.0632803
	12.289	0.0674382			12.2878	0.0287989					12.0855	0.0707895			12.0808	0.081629			12.0803	0.0632621
	12.2975	0.0662497			12.2962	0.0286545					12.0934	0.068221			12.0887	0.0796666			12.0882	0.0628654
	12.3059	0.0651159			12.3046	0.0285008					12.1013	0.0655815			12.0966	0.077989			12.0961	0.0623552
	12.3143	0.064006			12.313	0.0283359					12.1092	0.0628747			12.1045	0.0764107			12.104	0.0619549
	12.3227	0.0628924			12.3214	0.028128					12.1171	0.0603633			12.1124	0.074863			12.1119	0.0615314
	12.3311	0.0618676			12.3299	0.0278814					12.125	0.0581415			12.1203	0.0731425			12.1198	0.0611431
	12.3395	0.0608954			12.3383	0.0276557					12.1328	0.0558824			12.1282	0.0720561			12.1277	0.0610325
	12.348	0.0599682			12.3467	0.0275001					12.1407	0.0538418			12.136	0.071094			12.1356	0.0609219
	12.3564	0.0590613			12.3551	0.027356					12.1486	0.0518212			12.1439	0.0692516			12.1434	0.0605451
	12.3648	0.0581804			12.3635	0.0272183					12.1565	0.04968			12.1518	0.0677342			12.1513	0.0604614
	12.3732	0.0573291			12.3719	0.0270548					12.1644	0.0478072			12.1597	0.0664982			12.1592	0.0604156
	12.3816	0.0565169			12.3804	0.0269581					12.1723	0.0461708			12.1676	0.0655095			12.1671	0.0605048
	12.39	0.0557359			12.3888	0.0268553					12.1802	0.0446198			12.1755	0.0637749			12.175	0.0605386
	12.3985	0.0549536			12.3972	0.0267449					12.1881	0.0429864			12.1834	0.0619775			12.1829	0.0604766
	12.4069	0.0542439			12.4056	0.0266014					12.196	0.0412046			12.1913	0.0612711			12.1908	0.0604147
	12.4153	0.0535738			12.414	0.0264354					12.2039	0.0396115			12.1992	0.0605643			12.1987	0.0600726
	12.4237	0.0528986			12.4224	0.0263217					12.2118	0.0380593			12.2071	0.0599909			12.2066	0.060145
	12.4321	0.0521688			12.4309	0.0262272					12.2197	0.0366725			12.215	0.0586298			12.2145	0.0601977
	12.4405	0.0513953			12.4393	0.0261063					12.2276	0.0354003			12.2229	0.0574806			12.2224	0.0600654
	12.449	0.0506777			12.4477	0.0259691					12.2355	0.0341317			12.2308	0.0565067			12.2303	0.0599332
	12.4574	0.0500154			12.4561	0.0258915					12.2434	0.0327318			12.2387	0.0555578			12.2382	0.0602389
	12.4658	0.0494022			12.4645	0.0258243					12.2513	0.0315712			12.2466	0.0545115			12.2461	0.0602456
	12.4742	0.0488328			12.4729	0.0257583					12.2592	0.0305291			12.2545	0.0536682			12.254	0.0602434
	12.4826	0.0482737			12.4814	0.0256962					12.2671	0.0292781			12.2624	0.0531785			12.2619	0.0602412
	12.4911	0.0477072			12.4898	0.0256664					12.275	0.0281031			12.2703	0.0523999			12.2698	0.0602315
	12.4995	0.0471584			12.4982	0.0256378					12.2829	0.0271132			12.2782	0.0514547			12.2777	0.0602217
	12.5079	0.0466159			12.5066	0.0255676					12.2908	0.0263726			12.2861	0.0510004			12.2856	0.0601321
	12.5163	0.0460785			12.515	0.0254665					12.2986	0.0253096			12.294	0.050546			12.2935	0.0600998
	12.5247	0.0455355			12.5235	0.0254081					12.3065	0.024492			12.3018	0.0495769			12.3014	0.0601364
	12.5331	0.0450293			12.5319	0.0254358					12.3144	0.0238476			12.3097	0.0494852			12.3092	0.0603761
	12.5416	0.0445542			12.5403	0.0254627					12.3223	0.0228049			12.3176	0.0490681			12.3171	0.0605158
	12.55	0.044091			12.5487	0.025478					12.3302	0.0218453			12.3255	0.0487778			12.325	0.0606554
	12.5584	0.043652			12.5571	0.0254833					12.3381	0.0210365			12.3334	0.0483072			12.3329	0.0606747
	12.5668	0.0431779			12.5655	0.0254808					12.346	0.0203632			12.3413	0.0476621			12.3408	0.0607645
	12.5752	0.0426722			12.574	0.0254681					12.3539	0.0197002			12.3492	0.0469698			12.3487	0.0614928
	12.5836	0.0421861			12.5824	0.0254115					12.3618	0.0189609			12.3571	0.0464149			12.3566	0.0617508
	12.5921	0.0417236			12.5908	0.0253544					12.3697	0.018278			12.365	0.0463092			12.3645	0.0620088
	12.6005	0.0412398			12.5992	0.0252793					12.3776	0.0178757			12.3729	0.0456958			12.3724	0.0620693
	12.6089	0.0407855			12.6076	0.0252829					12.3855	0.0172548			12.3808	0.0452448			12.3803	0.0624707
	12.6173	0.0403975			12.616	0.0253008					12.3934	0.0165334			12.3887	0.0447301			12.3882	0.0625597
	12.6257	0.0400456			12.6245	0.0253238					12.4013	0.0160566			12.3966	0.0444359			12.3961	0.0631046
	12.6341	0.0397251			12.6329	0.0253509					12.4092	0.0155134			12.4045	0.0438751			12.404	0.0637191
	12.6426	0.0394211			12.6413	0.025378					12.4171	0.015016			12.4124	0.0430415			12.4119	0.0637804
	12.651	0.0391125			12.6497	0.0254011					12.425	0.014676			12.4203	0.0427974			12.4198	0.0638417
	12.6594	0.0388229			12.6581	0.0254157					12.4329	0.0142452			12.4282	0.0423223			12.4277	0.064067
	12.6678	0.0385461			12.6665	0.025373					12.4408	0.0135639			12.4361	0.0417723			12.4356	0.0644374
	12.6762	0.038238			12.675	0.0253338					12.4487	0.0131367			12.444	0.0409003			12.4435	0.0647216
	12.6846	0.0379076			12.6834	0.0253253					12.4566	0.012737			12.4519	0.0406621			12.4514	0.0651794
	12.6931	0.0375442			12.6918	0.0253207					12.4644	0.0123307			12.4598	0.0406615			12.4593	0.0655867
	12.7015	0.0371462			12.7002	0.0253203					12.4723	0.0120814			12.4676	0.040661			12.4672	0.0659218
	12.7099	0.0367814			12.7086	0.0253296					12.4802	0.0116996			12.4755	0.0406104			12.475	0.0663447
	12.7183	0.0364503			12.7171	0.0253576					12.4881	0.0112283			12.4834	0.0402707			12.4829	0.0667826
	12.7267	0.0361434			12.7255	0.0254013					12.496	0.0108929			12.4913	0.0398736			12.4908	0.0674294
	12.7352	0.0357976			12.7339	0.0254487					12.5039	0.0105855			12.4992	0.0396012			12.4987	0.0678228
	12.7436	0.0354553			12.7423	0.0254893					12.5118	0.0101598			12.5071	0.0394925			12.5066	0.0681134
	12.752	0.0351189			12.7507	0.0255039					12.5197	0.0100003			12.515	0.0394671			12.5145	0.0686602
	12.7604	0.0348298			12.7591	0.0255001					12.5276	0.0098784			12.5229	0.0390246			12.5224	0.0688048
	12.7688	0.0345708			12.7676	0.0255263					12.5355	0.00953558			12.5308	0.0381079			12.5303	0.0692222
	12.7772	0.034338			12.776	0.0255424					12.5434	0.00931767			12.5387	0.038147			12.5382	0.0695284
	12.7857	0.0341228			12.7844	0.025548					12.5513	0.0089714			12.5466	0.0380251			12.5461	0.0696396
	12.7941	0.0339274			12.7928	0.0255294					12.5592	0.0086452			12.5545	0.0379031			12.554	0.0702344
	12.8025	0.0337504			12.8012	0.0255111					12.5671	0.00854104			12.5624	0.0374936			12.5619	0.0705406
	12.8109	0.0335858			12.8096	0.0254949					12.575	0.00834178			12.5703	0.0369022			12.5698	0.0713789
	12.8193	0.0333865			12.8181	0.0254985					12.5829	0.00805732			12.5782	0.0368225			12.5777	0.0716923
	12.8277	0.0331336			12.8265	0.0255108					12.5908	0.00792428			12.5861	0.0367428			12.5856	0.0719633
	12.8362	0.0328951			12.8349	0.0255325					12.5987	0.00775122			12.594	0.0363652			12.5935	0.0726602
	12.8446	0.0326665			12.8433	0.025579					12.6066	0.00739533			12.6019	0.0359533			12.6014	0.0731568
	12.853	0.0324474			12.8517	0.0256202					12.6145	0.00713972			12.6098	0.0359013			12.6093	0.0736417
	12.8614	0.0322469			12.8601	0.025653					12.6223	0.00687297			12.6177	0.0358494			12.6172	0.073963
	12.8698	0.0320571			12.8686	0.0256794					12.6302	0.00671861			12.6255	0.0350028			12.6251	0.0742472
	12.8782	0.0318202			12.877	0.0257085					12.6381	0.00653032			12.6334	0.0350331			12.6329	0.0744111
	12.8867	0.0316067			12.8854	0.0257181					12.646	0.00643415			12.6413	0.0348655			12.6408	0.0746867
	12.8951	0.0314121			12.8938	0.0257127					12.6539	0.00633798			12.6492	0.0346979			12.6487	0.0754
	12.9035	0.0312327			12.9022	0.025722					12.6618	0.00612835			12.6571	0.0344653			12.6566	0.0757498
	12.9119	0.0310476			12.9106	0.0257314					12.6697	0.00592312			12.665	0.034369			12.6645	0.0759964
	12.9203	0.0308383			12.9191	0.0257292					12.6776	0.00587084			12.6729	0.0342727			12.6724	0.0763849
	12.9287	0.0306296			12.9275	0.0257139					12.6855	0.00561948			12.6808	0.0340419			12.6803	0.0767176
	12.9372	0.0304324			12.9359	0.0256586					12.6934	0.00547656			12.6887	0.0336166			12.6882	0.0771737
	12.9456	0.0302024			12.9443	0.0256081					12.7013	0.00529181			12.6966	0.0332979			12.6961	0.0777392
	12.954	0.0299979			12.9527	0.0255724					12.7092	0.00507979			12.7045	0.0328414			12.704	0.0784764
	12.9624	0.0298217			12.9612	0.0255466					12.7171	0.00491472			12.7124	0.032827			12.7119	0.079039
	12.9708	0.0296655			12.9696	0.0255246					12.725	0.00448568			12.7203	0.0325103			12.7198	0.0791727
	12.9793	0.0295222			12.978	0.0255018					12.7329	0.00444122			12.7282	0.0321935			12.7277	0.0791825
	12.9877	0.0293865			12.9864	0.0254782					12.7408	0.00439675			12.7361	0.0318701			12.7356	0.0793031
	12.9961	0.0292199			12.9948	0.0254517					12.7487	0.00428099			12.744	0.0318694			12.7435	0.0794726
											12.7566	0.00416068			12.7519	0.0316384			12.7514	0.0798553
											12.7645	0.00410179			12.7598	0.0316243			12.7593	0.080782
											12.7724	0.0040429			12.7677	0.0312108			12.7672	0.081196
											12.7803	0.00388708			12.7756	0.0311388			12.7751	0.0814316
											12.7881	0.00386552			12.7835	0.0310733			12.783	0.0820576
											12.796	0.00382376			12.7913	0.0307822			12.7909	0.0824812
											12.8039	0.0036664			12.7992	0.0303874			12.7987	0.0827412
											12.8118	0.00358189			12.8071	0.0302251			12.8066	0.0830664
											12.8197	0.00356627			12.815	0.0300628			12.8145	0.083824
											12.8276	0.00355064			12.8229	0.0292774			12.8224	0.0842726
											12.8355	0.00348987			12.8308	0.0290646			12.8303	0.084375
											12.8434	0.00323547			12.8387	0.0288097			12.8382	0.0844773
											12.8513	0.00321678			12.8466	0.028732			12.8461	0.0844799
											12.8592	0.00319701			12.8545	0.0286543			12.854	0.0851205
											12.8671	0.00317733			12.8624	0.0284128			12.8619	0.0853956
											12.875	0.00315766			12.8703	0.0279442			12.8698	0.0856707
											12.8829	0.00308005			12.8782	0.0278948			12.8777	0.0856953
											12.8908	0.00297252			12.8861	0.0276323			12.8856	0.0858493
											12.8987	0.00296616			12.894	0.0269029			12.8935	0.0858655
											12.9066	0.00295979			12.9019	0.0265927			12.9014	0.0858817
											12.9145	0.0029306			12.9098	0.0265094			12.9093	0.0861659
											12.9224	0.00294359			12.9177	0.0264842			12.9172	0.0864574
											12.9303	0.00302751			12.9256	0.025959			12.9251	0.08704
											12.9382	0.00302294			12.9335	0.0258699			12.933	0.0870824
											12.946	0.00301836			12.9414	0.0257808			12.9409	0.0871847
											12.9539	0.00285598			12.9492	0.0253705			12.9488	0.0873259
											12.9618	0.00288457			12.9571	0.0254822			12.9567	0.0873822
											12.9697	0.00291316			12.965	0.026322			12.9645	0.0873072
											12.9776	0.00287702			12.9729	0.0264901			12.9724	0.0872322
											12.9855	0.00284087			12.9808	0.0264963			12.9803	0.0872408
											12.9934	0.00273373			12.9887	0.0265025			12.9882	0.0872442
															12.9966	0.0263469			12.9961	0.0871838
