# Supplementary material for: RNA-directed activation of cytoplasmic dynein-1 in reconstituted transport RNPs
Source: eLife journal article supplement (doi:10.7554/elife.36312), 2018-06-26
Supplement: supp [file elife-36312-supp-v1.zip › elife_poa_e36312_Figure_6_figure_supplement_5_source_data_1.xlsx]

## Sheet: Sheet1
Egl/DmBicD -ILS elution volume (ml; for differential refractive index axis)	Egl/DmBicD -ILS differential refractive index (normalised)	Egl/DmBicD -ILS elution volume (ml; for mean molar mass axis)	Egl/DmBicD -ILS mean molar mass (Da)	Egl/DmBicD +ILS elution volume (ml; for differential refractive index axis)	Egl/DmBicD +ILS differential refractive index (normalised)	Egl/DmBicD +ILS elution volume (ml; for mean molar mass axis)	Egl/DmBicD +ILS mean molar mass (Da)
7.00468	-0.0360253	9.61911	299132	7.00465	-0.0102909	9.03832	419916
7.01258	-0.0350664	9.62753	298256	7.01255	-0.0102432	9.04674	418204
7.02047	-0.0342378	9.63595	297814	7.02044	-0.00993278	9.05515	415299
7.02837	-0.0340036	9.64436	292456	7.02834	-0.00986456	9.06357	412753
7.03626	-0.0344922	9.65278	294314	7.03623	-0.0100142	9.07199	411808
7.04416	-0.0349807	9.6612	293517	7.04413	-0.0101639	9.08041	411107
7.05205	-0.0352708	9.66962	293018	7.05203	-0.0104148	9.08882	409404
7.05995	-0.0354095	9.67803	291864	7.05992	-0.0100218	9.09724	406646
7.06784	-0.0346446	9.68645	289561	7.06782	-0.0100363	9.10566	405075
7.07574	-0.0344142	9.69487	287706	7.07571	-0.0101058	9.11408	404308
7.08363	-0.0341838	9.70329	287807	7.08361	-0.0101754	9.12249	402618
7.09153	-0.0337529	9.7117	287685	7.0915	-0.00989121	9.13091	399984
7.09942	-0.0341258	9.72012	285628	7.0994	-0.00962299	9.13933	398445
7.10732	-0.0344987	9.72854	284045	7.10729	-0.00972016	9.14774	398207
7.11521	-0.035343	9.73695	284166	7.11519	-0.00981734	9.15616	397420
7.12311	-0.0355096	9.74537	283371	7.12308	-0.0100229	9.16458	395400
7.131	-0.0345975	9.75379	281122	7.13098	-0.0100659	9.173	393618
7.1389	-0.0343399	9.76221	279257	7.13887	-0.00963378	9.18141	392711
7.14679	-0.0340824	9.77062	279189	7.14677	-0.00946022	9.18983	391527
7.15469	-0.033662	9.77904	279093	7.15466	-0.00928665	9.19825	389285
7.16258	-0.0335819	9.78746	277444	7.16256	-0.00908475	9.20667	387604
7.17048	-0.0338165	9.79588	275934	7.17045	-0.00885519	9.21508	387342
7.17837	-0.0340512	9.80429	275584	7.17835	-0.00891574	9.2235	387091
7.18627	-0.034352	9.81271	275361	7.18624	-0.0089763	9.23192	385803
7.19416	-0.03328	9.82113	273764	7.19414	-0.00920603	9.24033	384380
7.20206	-0.0329818	9.82954	272058	7.20203	-0.00802511	9.24875	383585
7.20995	-0.0326836	9.83796	271947	7.20993	-0.00753588	9.25717	382779
7.21785	-0.032157	9.84638	272247	7.21782	-0.00741903	9.26559	381379
7.22574	-0.0318908	9.8548	271585	7.22572	-0.00730218	9.274	380010
7.23364	-0.0316246	9.86321	269762	7.23361	-0.00680485	9.28242	379495
7.24153	-0.0312377	9.87163	268900	7.24151	-0.00605663	9.29084	379302
7.24943	-0.0313904	9.88005	269528	7.2494	-0.00560308	9.29926	378570
7.25732	-0.031543	9.88847	269028	7.2573	-0.00553625	9.30767	377406
7.26522	-0.0319089	9.89688	267141	7.26519	-0.00510556	9.31609	376700
7.27311	-0.0314784	9.9053	266398	7.27309	-0.00421794	9.32451	376209
7.28101	-0.0310479	9.91372	267225	7.28098	-0.00338289	9.33292	375169
7.2889	-0.0309449	9.92213	267285	7.28888	-0.00268206	9.34134	373932
7.2968	-0.0300367	9.93055	266132	7.29677	-0.0018896	9.34976	373402
7.30469	-0.0290671	9.93897	265551	7.30467	-0.000716058	9.35818	373535
7.31259	-0.0289793	9.94739	266091	7.31256	0.000272341	9.36659	373314
7.32049	-0.0289407	9.9558	265845	7.32046	0.000620414	9.37501	372353
7.32838	-0.0289022	9.96422	264609	7.32835	0.000765382	9.38343	371353
7.33628	-0.0279037	9.97264	263691	7.33625	0.00126065	9.39185	370888
7.34417	-0.027645	9.98106	263928	7.34414	0.00295086	9.40026	370280
7.35207	-0.0273864	9.98947	264410	7.35204	0.00439095	9.40868	369343
7.35996	-0.0268691	9.99789	263869	7.35993	0.00548647	9.4171	368640
7.36786	-0.0251894	10.0063	262963	7.36783	0.00720081	9.42551	368432
7.37575	-0.0250254	10.0147	262731	7.37572	0.00922545	9.43393	368204
7.38365	-0.0249406	10.0231	262939	7.38362	0.0109141	9.44235	367438
7.39154	-0.024887	10.0316	262301	7.39151	0.0117067	9.45077	366582
7.39944	-0.0248333	10.04	261346	7.39941	0.0131624	9.45918	366304
7.40733	-0.0244756	10.0484	261635	7.4073	0.0149637	9.4676	366264
7.41523	-0.0227321	10.0568	262545	7.4152	0.0169259	9.47602	365345
7.42312	-0.0222648	10.0652	262703	7.42309	0.0185829	9.48444	364946
7.43102	-0.0217975	10.0736	262571	7.43099	0.0202969	9.49285	364870
7.43891	-0.0210755	10.0821	262587	7.43888	0.0227432	9.50127	364689
7.44681	-0.0195398	10.0905	262561	7.44678	0.0251695	9.50969	364199
7.4547	-0.01964	10.0989	261575	7.45467	0.0274511	9.5181	363687
7.4626	-0.0197403	10.1073	260733	7.46257	0.0293706	9.52652	363213
7.47049	-0.020104	10.1157	260365	7.47046	0.0311568	9.53494	362715
7.47839	-0.0186767	10.1241	260104	7.47836	0.0333857	9.54336	362241
7.48628	-0.0164286	10.1326	259890	7.48625	0.0366255	9.55177	361738
7.49418	-0.0162668	10.141	259727	7.49415	0.0393732	9.56019	361181
7.50207	-0.0153959	10.1494	259584	7.50204	0.041086	9.56861	361042
7.50997	-0.0137508	10.1578	259478	7.50994	0.0433065	9.57703	360859
7.51786	-0.0136365	10.1662	259156	7.51783	0.0475867	9.58544	360151
7.52576	-0.0135677	10.1747	258636	7.52573	0.0506589	9.59386	359346
7.53365	-0.0134988	10.1831	258276	7.53362	0.0524813	9.60228	359268
7.54155	-0.0131369	10.1915	258061	7.54152	0.0550326	9.61069	359022
7.54944	-0.0123164	10.1999	258117	7.54941	0.0588344	9.61911	358328
7.55734	-0.0114483	10.2083	257941	7.55731	0.0627611	9.62753	357914
7.56523	-0.00991204	10.2167	257727	7.5652	0.0656773	9.63595	358005
7.57313	-0.00933387	10.2252	257788	7.5731	0.0687565	9.64436	357838
7.58102	-0.00897646	10.2336	258185	7.58099	0.0724467	9.65278	357141
7.58892	-0.00688124	10.242	258047	7.58889	0.076758	9.6612	356476
7.59681	-0.00648295	10.2504	257876	7.59678	0.0803223	9.66962	356076
7.60471	-0.00626528	10.2588	257919	7.60468	0.082905	9.67803	355682
7.6126	-0.00604761	10.2672	258640	7.61257	0.0860045	9.68645	355105
7.6205	-0.00385035	10.2757	258783	7.62047	0.0897594	9.69487	354609
7.62839	-0.00361002	10.2841	258497	7.62836	0.0936083	9.70329	354317
7.63629	-0.00336969	10.2925	258439	7.63626	0.0969638	9.7117	354062
7.64418	-0.00279188	10.3009	258588	7.64415	0.100045	9.72012	353627
7.65208	-0.000548725	10.3093	258253	7.65205	0.103955	9.72854	353208
7.65997	-0.000304601	10.3177	258104	7.65995	0.108669	9.73695	352764
7.66787	-6.04775e-05	10.3262	258361	7.66784	0.112064	9.74537	352503
7.67576	6.9566e-05	10.3346	259123	7.67574	0.113403	9.75379	352038
7.68366	0.000967333	10.343	259875	7.68363	0.115931	9.76221	351394
7.69155	0.00165462	10.3514	259568	7.69153	0.120487	9.77062	351131
7.69945	0.00210212	10.3598	259179	7.69942	0.124753	9.77904	351049
7.70734	0.00260443	10.3683	259669	7.70732	0.127027	9.78746	350795
7.71524	0.00329312	10.3767	259973	7.71521	0.129199	9.79588	350202
7.72313	0.00451025	10.3851	259528	7.72311	0.132741	9.80429	349898
7.73103	0.00574478	10.3935	259599	7.731	0.136795	9.81271	349836
7.73893	0.00581795	10.4019	260408	7.7389	0.138642	9.82113	349355
7.74682	0.00589112	10.4103	260945	7.74679	0.140107	9.82954	348701
7.75472	0.00630561	10.4188	260616	7.75469	0.142991	9.83796	348540
7.76261	0.00716307	10.4272	260085	7.76258	0.145921	9.84638	348438
7.77051	0.0074968	10.4356	260094	7.77048	0.148465	9.8548	347826
7.7784	0.00783052	10.444	260083	7.77837	0.150683	9.86321	347354
7.7863	0.00851137	10.4524	259470	7.78627	0.152672	9.87163	347184
7.79419	0.00968497	10.4608	259211	7.79416	0.154922	9.88005	346991
7.80209	0.00992184	10.4693	259536	7.80206	0.157753	9.88847	346739
7.80998	0.00982928	10.4777	259980	7.80995	0.159483	9.89688	346226
7.81788	0.00973673	10.4861	260062	7.81785	0.160769	9.9053	345703
7.82577	0.0113703	10.4945	259858	7.82574	0.162465	9.91372	345405
7.83367	0.0122017	10.5029	259762	7.83364	0.164741	9.92213	345165
7.84156	0.0130331	10.5113	259929	7.84153	0.166333	9.93055	344740
7.84946	0.013823	10.5198	259695	7.84943	0.167242	9.93897	344391
7.85735	0.0146776	10.5282	258598	7.85732	0.168724	9.94739	344072
7.86525	0.0157537	10.5366	258110	7.86522	0.170582	9.9558	343697
7.87314	0.0158731	10.545	258423	7.87311	0.171936	9.96422	343297
7.88104	0.0159474	10.5534	258605	7.88101	0.172089	9.97264	343014
7.88893	0.0160218	10.5618	258418	7.8889	0.17233	9.98106	343038
7.89683	0.0161023	10.5703	258754	7.8968	0.172981	9.98947	342595
7.90472	0.0182456	10.5787	259386	7.90469	0.174769	9.99789	341935
7.91262	0.018609	10.5871	259467	7.91259	0.175778	10.0063	341579
7.92051	0.0186875	10.5955	258864	7.92048	0.176115	10.0147	341357
7.92841	0.0193496	10.6039	258832	7.92838	0.177163	10.0231	341004
7.9363	0.0190673	10.6124	259247	7.93627	0.178181	10.0316	340330
7.9442	0.018785	10.6208	259140	7.94417	0.178492	10.04	339869
7.95209	0.0180877	10.6292	259084	7.95206	0.178579	10.0484	339581
7.95999	0.0180613	10.6376	259052	7.95996	0.178666	10.0568	339203
7.96788	0.0191527	10.646	259236	7.96785	0.178821	10.0652	338836
7.97578	0.0199204	10.6544	259052	7.97575	0.179348	10.0736	338423
7.98367	0.0202324	10.6629	258549	7.98364	0.179582	10.0821	337890
7.99157	0.0205445	10.6713	258174	7.99154	0.179817	10.0905	337325
7.99946	0.0217294	10.6797	258284	7.99943	0.180256
8.00736	0.0222823	10.6881	258631	8.00733	0.180825
8.01525	0.022096	10.6965	258363	8.01522	0.18087
8.02315	0.0219098	10.7049	257756	8.02312	0.180808
8.03104	0.022713	10.7134	257668	8.03101	0.180745
8.03894	0.0240611	10.7218	258103	8.03891	0.181294
8.04683	0.0246363	10.7302	257782	8.0468	0.181519
8.05473	0.0248992	10.7386	257078	8.0547	0.181621
8.06262	0.0251622	10.747	256655	8.06259	0.181724
8.07052	0.0256971	10.7554	256789	8.07049	0.18253
8.07841	0.026243	10.7639	256270	8.07838	0.182467
8.08631	0.0262589			8.08628	0.182403
8.0942	0.0262748			8.09417	0.182136
8.1021	0.0256513			8.10207	0.181725
8.10999	0.0268129			8.10996	0.181523
8.11789	0.0271895			8.11786	0.182188
8.12578	0.0272589			8.12575	0.182759
8.13368	0.0273284			8.13365	0.182744
8.14157	0.0282941			8.14154	0.182729
8.14947	0.0291351			8.14944	0.183086
8.15736	0.0293954			8.15733	0.183219
8.16526	0.0296557			8.16523	0.183009
8.17316	0.0304798			8.17312	0.182799
8.18105	0.0308359			8.18102	0.183686
8.18895	0.031192			8.18891	0.183987
8.19684	0.0314126			8.19681	0.184289
8.20474	0.031518			8.2047	0.18428
8.21263	0.0316234			8.2126	0.184826
8.22053	0.0318389			8.22049	0.185789
8.22842	0.0318366			8.22839	0.185914
8.23632	0.0318343			8.23628	0.18592
8.24421	0.030952			8.24418	0.185927
8.25211	0.0325948			8.25207	0.186567
8.26	0.0328772			8.25997	0.187771
8.2679	0.0329404			8.26786	0.188656
8.27579	0.0330036			8.27576	0.189275
8.28369	0.0334287			8.28366	0.18998
8.29158	0.0334337			8.29155	0.191239
8.29948	0.0334387			8.29945	0.191689
8.30737	0.0328865			8.30734	0.191835
8.31527	0.0344937			8.31524	0.19244
8.32316	0.03491			8.32313	0.193964
8.33106	0.0353263			8.33103	0.195721
8.33895	0.0353777			8.33892	0.196753
8.34685	0.035926			8.34682	0.198095
8.35474	0.0361799			8.35471	0.200234
8.36264	0.036141			8.36261	0.202277
8.37053	0.0361021			8.3705	0.202819
8.37843	0.0361154			8.3784	0.203647
8.38632	0.0360349			8.38629	0.205408
8.39422	0.0370853			8.39419	0.207662
8.40211	0.0372229			8.40208	0.209604
8.41001	0.0373606			8.40998	0.211199
8.4179	0.0375256			8.41787	0.213656
8.4258	0.0375796			8.42577	0.216286
8.43369	0.0372236			8.43366	0.218919
8.44159	0.0368676			8.44156	0.220605
8.44948	0.0357702			8.44945	0.222316
8.45738	0.0364598			8.45735	0.224583
8.46527	0.0367304			8.46524	0.227633
8.47317	0.0363491			8.47314	0.231112
8.48106	0.0359678			8.48103	0.233523
8.48896	0.037314			8.48893	0.236475
8.49685	0.03735			8.49682	0.241115
8.50475	0.037386			8.50472	0.245458
8.51264	0.036866			8.51261	0.247972
8.52054	0.0373575			8.52051	0.250043
8.52843	0.0375313			8.5284	0.253635
8.53633	0.0376926			8.5363	0.258473
8.54422	0.0377372			8.54419	0.261847
8.55212	0.0377817			8.55209	0.264835
8.56001	0.0367154			8.55998	0.269534
8.56791	0.0366551			8.56788	0.275187
8.5758	0.0365948			8.57577	0.279716
8.5837	0.0363535			8.58367	0.283125
8.5916	0.0355693			8.59156	0.286465
8.59949	0.0360741			8.59946	0.291441
8.60739	0.0363025			8.60735	0.297886
8.61528	0.0365309			8.61525	0.303264
8.62318	0.0368329			8.62314	0.307477
8.63107	0.038288			8.63104	0.312343
8.63897	0.0381869			8.63893	0.319182
8.64686	0.0380858			8.64683	0.326006
8.65476	0.0376818			8.65472	0.33003
8.66265	0.0376815			8.66262	0.333992
8.67055	0.0379302			8.67051	0.340874
8.67844	0.0379993			8.67841	0.348337
8.68634	0.0380683			8.6863	0.35389
8.69423	0.0381562			8.6942	0.359727
8.70213	0.038244			8.70209	0.366874
8.71002	0.0383425			8.70999	0.374739
8.71792	0.0380508			8.71788	0.381505
8.72581	0.0377591			8.72578	0.386094
8.73371	0.0371641			8.73367	0.391531
8.7416	0.0373717			8.74157	0.399121
8.7495	0.0373052			8.74946	0.40716
8.75739	0.0372386			8.75736	0.414658
8.76529	0.0370346			8.76525	0.421442
8.77318	0.0375972			8.77315	0.429508
8.78108	0.0376807			8.78104	0.438762
8.78897	0.0370108			8.78894	0.44631
8.79687	0.0363409			8.79683	0.452447
8.80476	0.0374248			8.80473	0.458765
8.81266	0.0376838			8.81262	0.467176
8.82055	0.0379428			8.82052	0.476633
8.82845	0.0382175			8.82841	0.483963
8.83634	0.0385809			8.83631	0.490949
8.84424	0.0392692			8.8442	0.500279
8.85213	0.0392406			8.8521	0.50982
8.86003	0.0392119			8.85999	0.517298
8.86792	0.0390511			8.86789	0.523687
8.87582	0.0404648			8.87578	0.531508
8.88371	0.0421185			8.88368	0.540779
8.89161	0.0421818			8.89158	0.549603
8.8995	0.0427232			8.89947	0.557526
8.9074	0.0433052			8.90737	0.565808
8.91529	0.045891			8.91526	0.575539
8.92319	0.0459638			8.92316	0.585659
8.93108	0.0459594			8.93105	0.593556
8.93898	0.0459551			8.93895	0.599775
8.94687	0.0484511			8.94684	0.607281
8.95477	0.051476			8.95474	0.617694
8.96266	0.0528342			8.96263	0.627339
8.97056	0.0529263			8.97053	0.634511
8.97845	0.0548819			8.97842	0.642648
8.98635	0.0573883			8.98632	0.653007
8.99424	0.0591785			8.99421	0.662529
9.00214	0.0604489			9.00211	0.669951
9.01004	0.0611284			9.01	0.676499
9.01793	0.0632618			9.0179	0.685077
9.02583	0.0658946			9.02579	0.695311
9.03372	0.0687777			9.03369	0.703802
9.04162	0.0702746			9.04158	0.710809
9.04951	0.0727663			9.04948	0.719295
9.05741	0.0766817			9.05737	0.729584
9.0653	0.07945			9.06527	0.738391
9.0732	0.0802192			9.07316	0.744221
9.08109	0.0810249			9.08106	0.750131
9.08899	0.0852952			9.08895	0.758009
9.09688	0.0915094			9.09685	0.767879
9.10478	0.094388			9.10474	0.775973
9.11267	0.0966227			9.11264	0.782298
9.12057	0.10209			9.12053	0.789795
9.12846	0.10836			9.12843	0.799879
9.13636	0.111639			9.13632	0.808814
9.14425	0.11391			9.14422	0.813877
9.15215	0.118066			9.15211	0.818514
9.16004	0.123251			9.16001	0.826216
9.16794	0.128415			9.1679	0.835094
9.17583	0.133234			9.1758	0.842192
9.18373	0.138215			9.18369	0.847579
9.19162	0.143274			9.19159	0.854309
9.19952	0.149531			9.19948	0.863085
9.20741	0.155452			9.20738	0.869683
9.21531	0.158265			9.21527	0.873557
9.2232	0.162317			9.22317	0.877793
9.2311	0.169278			9.23106	0.884219
9.23899	0.177541			9.23896	0.891201
9.24689	0.18371			9.24685	0.896768
9.25478	0.188477			9.25475	0.901742
9.26268	0.19671			9.26264	0.907984
9.27057	0.204678			9.27054	0.915063
9.27847	0.21071			9.27843	0.920348
9.28636	0.216317			9.28633	0.923428
9.29426	0.223715			9.29422	0.92702
9.30215	0.233202			9.30212	0.932636
9.31005	0.241044			9.31001	0.938498
9.31794	0.247745			9.31791	0.942564
9.32584	0.255749			9.3258	0.94624
9.33373	0.265489			9.3337	0.951183
9.34163	0.273674			9.34159	0.956259
9.34952	0.279916			9.34949	0.95944
9.35742	0.28642			9.35738	0.961054
9.36531	0.294937			9.36528	0.96306
9.37321	0.305603			9.37317	0.966865
9.3811	0.315763			9.38107	0.971012
9.389	0.322997			9.38896	0.973505
9.39689	0.330955			9.39686	0.975742
9.40479	0.343708			9.40475	0.979173
9.41268	0.355699			9.41265	0.982554
9.42058	0.361787			9.42054	0.984311
9.42848	0.367211			9.42844	0.984927
9.43637	0.377304			9.43633	0.986537
9.44427	0.389406			9.44423	0.989508
9.45216	0.398941			9.45212	0.992223
9.46006	0.407714			9.46002	0.993103
9.46795	0.41837			9.46791	0.993528
9.47585	0.432743			9.47581	0.996204
9.48374	0.443882			9.4837	0.997346
9.49164	0.449757			9.4916	0.997387
9.49953	0.457308			9.4995	0.997429
9.50743	0.468757			9.50739	0.998367
9.51532	0.48015			9.51529	0.999175
9.52322	0.490154			9.52318	0.999398
9.53111	0.498517			9.53108	0.999621
9.53901	0.508501			9.53897	0.999821
9.5469	0.522465			9.54687	1
9.5548	0.533172			9.55476	0.999778
9.56269	0.538723			9.56266	0.999557
9.57059	0.544727			9.57055	0.997585
9.57848	0.556189			9.57845	0.996465
9.58638	0.569857			9.58634	0.996423
9.59427	0.57902			9.59424	0.99638
9.60217	0.58704			9.60213	0.994391
9.61006	0.600158			9.61003	0.993019
9.61796	0.614317			9.61792	0.99296
9.62585	0.623102			9.62582	0.991959
9.63375	0.629885			9.63371	0.989022
9.64164	0.63952			9.64161	0.986091
9.64954	0.65202			9.6495	0.984903
9.65743	0.662496			9.6574	0.983907
9.66533	0.671899			9.66529	0.981803
9.67322	0.681025			9.67319	0.97947
9.68112	0.692174			9.68108	0.977395
9.68901	0.704741			9.68898	0.975657
9.69691	0.714045			9.69687	0.973117
9.7048	0.718276			9.70477	0.970039
9.7127	0.724622			9.71266	0.966886
9.72059	0.736679			9.72056	0.964168
9.72849	0.747025			9.72845	0.961315
9.73638	0.753052			9.73635	0.958632
9.74428	0.760752			9.74424	0.955369
9.75217	0.772466			9.75214	0.952253
9.76007	0.78443			9.76003	0.949761
9.76796	0.79106			9.76793	0.946058
9.77586	0.794637			9.77582	0.941888
9.78375	0.80312			9.78372	0.937646
9.79165	0.81401			9.79161	0.934661
9.79954	0.822333			9.79951	0.931981
9.80744	0.828377			9.8074	0.92773
9.81533	0.834614			9.8153	0.923366
9.82323	0.845821			9.82319	0.920423
9.83112	0.855531			9.83109	0.917296
9.83902	0.85961			9.83898	0.912429
9.84692	0.862983			9.84688	0.9074
9.85481	0.868901			9.85477	0.903753
9.86271	0.879081			9.86267	0.899899
9.8706	0.887441			9.87056	0.895384
9.8785	0.889956			9.87846	0.891156
9.88639	0.894513			9.88635	0.886972
9.89429	0.905301			9.89425	0.882805
9.90218	0.913985			9.90214	0.878882
9.91008	0.915262			9.91004	0.874137
9.91797	0.915763			9.91793	0.869204
9.92587	0.922025			9.92583	0.864429
9.93376	0.931344			9.93372	0.860071
9.94166	0.935202			9.94162	0.855435
9.94955	0.936506			9.94951	0.850973
9.95745	0.942056			9.95741	0.84654
9.96534	0.950073			9.9653	0.842219
9.97324	0.955671			9.9732	0.837645
9.98113	0.957139			9.98109	0.832092
9.98903	0.957745			9.98899	0.827087
9.99692	0.961764			9.99688	0.822941
10.0048	0.967465			10.0048	0.818363
10.0127	0.971227			10.0127	0.813271
10.0206	0.972269			10.0206	0.808331
10.0285	0.974712			10.0285	0.804155
10.0364	0.981981			10.0364	0.799657
10.0443	0.983206			10.0443	0.794476
10.0522	0.983343			10.0521	0.789249
10.0601	0.983479			10.06	0.784433
10.068	0.987573			10.0679	0.779559
10.0759	0.990098			10.0758	0.774679
10.0838	0.991246			10.0837	0.770208
10.0917	0.992394			10.0916	0.765499
10.0996	0.996077			10.0995	0.760453
10.1075	0.998004			10.1074	0.756113
10.1153	0.998103			10.1153	0.751911
10.1232	0.998158			10.1232	0.74642
10.1311	0.998193			10.1311	0.740906
10.139	0.998227			10.139	0.737006
10.1469	0.998255			10.1469	0.73351
10.1548	0.998283			10.1548	0.727988
10.1627	0.998023			10.1627	0.722879
10.1706	0.999651			10.1706	0.71915
10.1785	1			10.1785	0.71498
10.1864	0.999596			10.1864	0.709883
10.1943	0.999191			10.1943	0.704863
10.2022	0.997221			10.2022	0.700436
10.2101	0.997103			10.2101	0.695972
10.218	0.996986			10.2179	0.691474
10.2259	0.995788			10.2258	0.687275
10.2338	0.993333			10.2337	0.682756
10.2417	0.992813			10.2416	0.678248
10.2496	0.992292			10.2495	0.674042
10.2575	0.99086			10.2574	0.669562
10.2654	0.986109			10.2653	0.664502
10.2733	0.983364			10.2732	0.660003
10.2811	0.982503			10.2811	0.655899
10.289	0.981641			10.289	0.651577
10.2969	0.977596			10.2969	0.646904
10.3048	0.97614			10.3048	0.642597
10.3127	0.975463			10.3127	0.638923
10.3206	0.972867			10.3206	0.63476
10.3285	0.968732			10.3285	0.630095
10.3364	0.963188			10.3364	0.625518
10.3443	0.958138			10.3443	0.621882
10.3522	0.956927			10.3522	0.617962
10.3601	0.955125			10.3601	0.613486
10.368	0.950112			10.368	0.609655
10.3759	0.945802			10.3758	0.605816
10.3838	0.944685			10.3837	0.601948
10.3917	0.942388			10.3916	0.597883
10.3996	0.936735			10.3995	0.593767
10.4075	0.930526			10.4074	0.589929
10.4154	0.927124			10.4153	0.585488
10.4233	0.924958			10.4232	0.58159
10.4312	0.921596			10.4311	0.578089
10.439	0.915949			10.439	0.573615
10.4469	0.912079			10.4469	0.569603
10.4548	0.910708			10.4548	0.566113
10.4627	0.906768			10.4627	0.56256
10.4706	0.901541			10.4706	0.558083
10.4785	0.89557			10.4785	0.55367
10.4864	0.891028			10.4864	0.550755
10.4943	0.88729			10.4943	0.547106
10.5022	0.883133			10.5022	0.542789
10.5101	0.87796			10.5101	0.539152
10.518	0.872689			10.518	0.535431
10.5259	0.870265			10.5259	0.531998
10.5338	0.866872			10.5337	0.528641
10.5417	0.860331			10.5416	0.524804
10.5496	0.853602			10.5495	0.520446
10.5575	0.849799			10.5574	0.516789
10.5654	0.846482			10.5653	0.513265
10.5733	0.840159			10.5732	0.509545
10.5812	0.834069			10.5811	0.505709
10.5891	0.829774			10.589	0.501884
10.5969	0.827143			10.5969	0.498217
10.6048	0.821812			10.6048	0.494968
10.6127	0.814657			10.6127	0.490974
10.6206	0.809909			10.6206	0.486681
10.6285	0.805582			10.6285	0.483344
10.6364	0.80125			10.6364	0.480214
10.6443	0.795882			10.6443	0.476543
10.6522	0.790606			10.6522	0.472225
10.6601	0.786013			10.6601	0.468617
10.668	0.781293			10.668	0.465533
10.6759	0.776664			10.6759	0.461683
10.6838	0.769482			10.6838	0.457839
10.6917	0.763446			10.6916	0.453869
10.6996	0.760071			10.6995	0.449993
10.7075	0.756896			10.7074	0.446539
10.7154	0.752054			10.7153	0.443118
10.7233	0.745856			10.7232	0.439495
10.7312	0.742272			10.7311	0.43546
10.7391	0.738642			10.739	0.431789
10.747	0.733006			10.7469	0.428463
10.7549	0.725804			10.7548	0.424825
10.7627	0.720768			10.7627	0.420907
10.7706	0.716282			10.7706	0.417306
10.7785	0.711102			10.7785	0.413734
10.7864	0.70711			10.7864	0.409905
10.7943	0.702081			10.7943	0.406242
10.8022	0.697296			10.8022	0.402764
10.8101	0.69323			10.8101	0.399355
10.818	0.6878			10.818	0.395321
10.8259	0.682427			10.8259	0.391374
10.8338	0.677846			10.8338	0.388022
10.8417	0.673083			10.8417	0.384282
10.8496	0.668437			10.8496	0.380173
10.8575	0.663228			10.8574	0.376388
10.8654	0.658093			10.8653	0.372645
10.8733	0.655055			10.8732	0.369223
10.8812	0.651848			10.8811	0.36569
10.8891	0.646267			10.889	0.362381
10.897	0.638533			10.8969	0.358643
10.9049	0.634244			10.9048	0.354762
10.9128	0.631808			10.9127	0.351257
10.9206	0.627719			10.9206	0.347668
10.9285	0.621631			10.9285	0.344289
10.9364	0.61696			10.9364	0.340469
10.9443	0.613496			10.9443	0.337088
10.9522	0.610019			10.9522	0.333934
10.9601	0.60525			10.9601	0.329958
10.968	0.599453			10.968	0.325982
10.9759	0.594471			10.9759	0.322844
10.9838	0.590021			10.9838	0.319485
10.9917	0.586486			10.9917	0.315934
10.9996	0.58226			10.9996	0.312553
11.0075	0.576438			11.0075	0.309004
11.0154	0.573521			11.0153	0.30534
11.0233	0.570837			11.0232	0.302116
11.0312	0.565395			11.0311	0.299069
11.0391	0.558716			11.039	0.295411
11.047	0.554538			11.0469	0.291726
11.0549	0.552371			11.0548	0.28843
11.0628	0.548094			11.0627	0.285687
11.0707	0.542431			11.0706	0.282239
11.0785	0.538472			11.0785	0.278166
11.0864	0.535545			11.0864	0.275011
11.0943	0.531611			11.0943	0.272478
11.1022	0.52692			11.1022	0.269478
11.1101	0.522649			11.1101	0.265379
11.118	0.518079			11.118	0.261832
11.1259	0.51501			11.1259	0.258877
11.1338	0.512525			11.1338	0.255846
11.1417	0.509511			11.1417	0.252496
11.1496	0.505592			11.1496	0.249446
11.1575	0.501109			11.1575	0.246748
11.1654	0.497139			11.1654	0.24379
11.1733	0.493025			11.1732	0.240704
11.1812	0.488551			11.1811	0.237662
11.1891	0.485415			11.189	0.234451
11.197	0.482102			11.1969	0.230909
11.2049	0.478356			11.2048	0.228459
11.2128	0.474084			11.2127	0.225797
11.2207	0.471229			11.2206	0.22295
11.2286	0.469483			11.2285	0.219911
11.2365	0.465514			11.2364	0.217611
11.2443	0.460212			11.2443	0.214894
11.2522	0.455998			11.2522	0.211418
11.2601	0.452915			11.2601	0.2084
11.268	0.450871			11.268	0.205878
11.2759	0.448746			11.2759	0.203253
11.2838	0.444499			11.2838	0.200398
11.2917	0.441821			11.2917	0.198151
11.2996	0.439372			11.2996	0.195496
11.3075	0.435778			11.3075	0.192345
11.3154	0.432308			11.3154	0.189592
11.3233	0.429133			11.3233	0.187599
11.3312	0.426261			11.3312	0.18497
11.3391	0.424139			11.339	0.182086
11.347	0.421034			11.3469	0.179926
11.3549	0.417206			11.3548	0.177634
11.3628	0.415269			11.3627	0.175286
11.3707	0.413634			11.3706	0.172782
11.3786	0.411155			11.3785	0.170594
11.3865	0.406536			11.3864	0.167956
11.3944	0.40279			11.3943	0.165487
11.4022	0.4003			11.4022	0.163577
11.4101	0.397765			11.4101	0.161749
11.418	0.395242			11.418	0.15952
11.4259	0.392916			11.4259	0.15739
11.4338	0.391265			11.4338	0.15523
11.4417	0.389399			11.4417	0.153456
11.4496	0.386622			11.4496	0.151458
11.4575	0.382678			11.4575	0.148836
11.4654	0.379532			11.4654	0.146843
11.4733	0.377702			11.4733	0.14508
11.4812	0.376155			11.4812	0.143207
11.4891	0.374			11.4891	0.141332
11.497	0.370235			11.4969	0.139728
11.5049	0.368925			11.5048	0.138106
11.5128	0.367385			11.5127	0.136265
11.5207	0.365845			11.5206	0.134737
11.5286	0.360947			11.5285	0.132918
11.5365	0.358375			11.5364	0.130753
11.5444	0.357858			11.5443	0.128742
11.5523	0.356454			11.5522	0.127738
11.5602	0.354079			11.5601	0.126612
11.568	0.353617			11.568	0.124682
11.5759	0.351846			11.5759	0.12317
11.5838	0.349291			11.5838	0.121947
11.5917	0.347082			11.5917	0.120716
11.5996	0.34344			11.5996	0.118751
11.6075	0.340627			11.6075	0.11699
11.6154	0.339617			11.6154	0.11584
11.6233	0.338075			11.6233	0.114706
11.6312	0.335363			11.6312	0.113318
11.6391	0.333334			11.6391	0.112362
11.647	0.332375			11.647	0.111162
11.6549	0.331846			11.6548	0.109597
11.6628	0.329378			11.6627	0.108654
11.6707	0.32644			11.6706	0.107644
11.6786	0.324155			11.6785	0.105821
11.6865	0.323559			11.6864	0.104471
11.6944	0.321121			11.6943	0.10408
11.7023	0.318759			11.7022	0.103391
11.7102	0.317796			11.7101	0.101815
11.7181	0.316898			11.718	0.100317
11.7259	0.314706			11.7259	0.100151
11.7338	0.31138			11.7338	0.0997823
11.7417	0.309396			11.7417	0.0981146
11.7496	0.308151			11.7496	0.0967372
11.7575	0.305448			11.7575	0.0960394
11.7654	0.303007			11.7654	0.0953701
11.7733	0.30119			11.7733	0.0946498
11.7812	0.299647			11.7812	0.0942474
11.7891	0.298058			11.7891	0.0935076
11.797	0.295747			11.797	0.0926767
11.8049	0.293044			11.8049	0.0919826
11.8128	0.290333			11.8127	0.0910612
11.8207	0.287929			11.8206	0.0903434
11.8286	0.286725			11.8285	0.0894586
11.8365	0.285189			11.8364	0.0890109
11.8444	0.282412			11.8443	0.0886607
11.8523	0.280719			11.8522	0.0882698
11.8602	0.280164			11.8601	0.0876384
11.8681	0.278448			11.868	0.0873117
11.876	0.274673			11.8759	0.0866756
11.8838	0.2721			11.8838	0.0854462
11.8917	0.271325			11.8917	0.0847412
11.8996	0.269884			11.8996	0.0846296
11.9075	0.266698			11.9075	0.084518
11.9154	0.26434			11.9154	0.084074
11.9233	0.263457			11.9233	0.08332
11.9312	0.262763			11.9312	0.0830935
11.9391	0.260186			11.9391	0.0827579
11.947	0.256155			11.947	0.0820977
11.9549	0.253248			11.9549	0.0816216
11.9628	0.252124			11.9628	0.0813069
11.9707	0.251598			11.9707	0.0810885
11.9786	0.250102			11.9785	0.0806964
11.9865	0.247238			11.9864	0.0806456
11.9944	0.24516			11.9943	0.0803954
12.0023	0.244902			12.0022	0.0800187
12.0102	0.242853			12.0101	0.0798327
12.0181	0.239274			12.018	0.0791866
12.026	0.237346			12.0259	0.0784834
12.0339	0.236511			12.0338	0.0780726
12.0418	0.235657			12.0417	0.0779205
12.0496	0.232793			12.0496	0.0777684
12.0575	0.231243			12.0575	0.0773876
12.0654	0.229783			12.0654	0.0771349
12.0733	0.2283			12.0733	0.0770225
12.0812	0.226483			12.0812	0.07691
12.0891	0.223567			12.0891	0.0765537
12.097	0.220716			12.097	0.0758041
12.1049	0.218724			12.1049	0.0756211
12.1128	0.21729			12.1128	0.0755282
12.1207	0.215649			12.1207	0.0754353
12.1286	0.214081			12.1286	0.0751928
12.1365	0.212051			12.1364	0.0747163
12.1444	0.211499			12.1443	0.0747909
12.1523	0.210085			12.1522	0.0747688
12.1602	0.206217			12.1601	0.0747468
12.1681	0.203707			12.168	0.0735412
12.176	0.202661			12.1759	0.0730346
12.1839	0.200447			12.1838	0.0730006
12.1918	0.198436			12.1917	0.0729666
12.1997	0.197336			12.1996	0.0727783
12.2075	0.196607			12.2075	0.0725154
12.2154	0.195375			12.2154	0.0724741
12.2233	0.192549			12.2233	0.0724329
12.2312	0.190554			12.2312	0.0713826
12.2391	0.188849			12.2391	0.0708074
12.247	0.186985			12.247	0.0703439
12.2549	0.18549			12.2549	0.0703169
12.2628	0.184392			12.2628	0.0702979
12.2707	0.183534			12.2707	0.070291
12.2786	0.183216			12.2786	0.0701755
12.2865	0.182745			12.2865	0.0700601
12.2944	0.179759			12.2943	0.069068
12.3023	0.177114			12.3022	0.0688546
12.3102	0.175914			12.3101	0.0686069
12.3181	0.175867			12.318	0.0680007
12.326	0.174248			12.3259	0.0678567
12.3339	0.171222			12.3338	0.0673835
12.3418	0.170828			12.3417	0.0666586
12.3497	0.170118			12.3496	0.0659508
12.3576	0.169408			12.3575	0.0657069
12.3654	0.167836			12.3654	0.065463
12.3733	0.16575			12.3733	0.0648773
12.3812	0.164837			12.3812	0.0639277
12.3891	0.163723			12.3891	0.0639083
12.397	0.162795			12.397	0.0638888
12.4049	0.16199			12.4049	0.0637216
12.4128	0.161534			12.4128	0.0626767
12.4207	0.160482			12.4207	0.0624259
12.4286	0.159522			12.4286	0.0621598
12.4365	0.157487			12.4365	0.0618937
12.4444	0.154938			12.4444	0.0611244
12.4523	0.153193			12.4522	0.0607711
12.4602	0.15317			12.4601	0.0600624
12.4681	0.153146			12.468	0.0595431
12.476	0.150925			12.4759	0.0590717
12.4839	0.149729			12.4838	0.0586977
12.4918	0.14944			12.4917	0.0582169
12.4997	0.149151			12.4996	0.0580292
12.5076	0.147928			12.5075	0.0575962
12.5155	0.146154			12.5154	0.0563593
12.5234	0.145986			12.5233	0.0551116
12.5312	0.145881			12.5312	0.0548074
12.5391	0.144873			12.5391	0.0546554
12.547	0.143747			12.547	0.0535938
12.5549	0.143078			12.5549	0.0526659
12.5628	0.142809			12.5628	0.0525422
12.5707	0.14236			12.5707	0.0524949
12.5786	0.13988			12.5786	0.0515231
12.5865	0.138657			12.5865	0.0501016
12.5944	0.136976			12.5944	0.0494456
12.6023	0.136636			12.6023	0.0491187
12.6102	0.136665			12.6102	0.0482466
12.6181	0.136693			12.618	0.0474229
12.626	0.135209			12.6259	0.0468373
12.6339	0.134911			12.6338	0.0463121
12.6418	0.134612			12.6417	0.0460227
12.6497	0.131999			12.6496	0.0453529
12.6576	0.130076			12.6575	0.0440503
12.6655	0.129857			12.6654	0.0426108
12.6734	0.129638			12.6733	0.0422132
12.6813	0.128904			12.6812	0.0417286
12.6891	0.12815			12.6891	0.0412439
12.697	0.12814			12.697	0.0399081
12.7049	0.128129			12.7049	0.0398483
12.7128	0.126996			12.7128	0.0398098
12.7207	0.126049			12.7207	0.0384833
12.7286	0.124639			12.7286	0.0370318
12.7365	0.124278			12.7365	0.0364313
12.7444	0.124			12.7444	0.0359834
12.7523	0.123722			12.7523	0.0355732
12.7602	0.122681			12.7602	0.0348205
12.7681	0.122532			12.7681	0.0341498
12.776	0.122383			12.7759	0.0339183
12.7839	0.121623			12.7838	0.0333926
12.7918	0.119867			12.7917	0.0325556
12.7997	0.118779			12.7996	0.0312751
12.8076	0.118746			12.8075	0.030531
12.8155	0.117765			12.8154	0.0300688
12.8234	0.116784			12.8233	0.0296576
12.8313	0.11617			12.8312	0.0289797
12.8392	0.116053			12.8391	0.0283129
12.8471	0.115935			12.847	0.0280616
12.8549	0.115152			12.8549	0.0277324
12.8628	0.114026			12.8628	0.0268959
12.8707	0.114113			12.8707	0.025501
12.8786	0.114001			12.8786	0.0250181
12.8865	0.113888			12.8865	0.0248755
12.8944	0.113434			12.8944	0.0238114
12.9023	0.112928			12.9023	0.0229318
12.9102	0.112933			12.9102	0.0228399
12.9181	0.112637			12.9181	0.022748
12.926	0.11234			12.926	0.0223426
12.9339	0.110276			12.9338	0.0214299
12.9418	0.109472			12.9417	0.0209466
12.9497	0.110266			12.9496	0.0203394
12.9576	0.110486			12.9575	0.0199638
12.9655	0.110103			12.9654	0.0197781
12.9734	0.10972			12.9733	0.0195925
12.9813	0.110028			12.9812	0.019019
12.9892	0.10969			12.9891	0.0189535
12.9971	0.109352			12.997	0.018888
13.005	0.108828
