# Supplementary material for: RNA-directed activation of cytoplasmic dynein-1 in reconstituted transport RNPs
Source: eLife journal article supplement (doi:10.7554/elife.36312), 2018-06-26
Supplement: supp [file elife-36312-supp-v1.zip › elife_poa_e36312_Figure_6_source_data_1.xlsx]

## Sheet: Sheet1
Figure 6A	Mean molar mass of 1.0 mg ml-1 Egl/BICD2 -ILS (kDa)	Mean molar mass of 1.0 mg ml-1 Egl/BICD2 +ILS (kDa)	Mean molar mass of 0.33 mg ml-1 Egl/BICD2 -ILS (kDa)	Mean molar mass of 0.33 mg ml-1 Egl/BICD2 +ILS (kDa)	Mean molar mass of 0.11 mg ml-1 Egl/BICD2 -ILS (kDa)	Mean molar mass of 0.11 mg ml-1 Egl/BICD2 +ILS (kDa)		Figure 6B	BICD2 elution volume (ml; for differential refractive index axis)	BICD2 differential refractive index (normalised)	BICD2 elution volume (ml; for mean molar mass axis)	BICD2 mean molar mass (Da)	Egl/BICD2 -ILS elution volume (ml; for differential refractive index axis)	Egl/BICD2 -ILS differential refractive index (normalised)	Egl/BICD2 -ILS elution volume (ml; for mean molar mass axis)	Egl/BICD2 -ILS mean molar mass (Da)	Egl/BICD2 +ILS elution volume (ml; for differential refractive index axis)	Egl/BICD2 +ILS differential refractive index (normalised)	Egl/BICD2 +ILS elution volume (ml; for mean molar mass axis)	Egl/BICD2 +ILS mean molar mass (Da)		Figure 6C	Egl/BICD2 -RNA elution volume (ml; for differential refractive index axis)	Egl/BICD2 -RNA differential refractive index (normalised)	Egl/BICD2 -RNA elution volume (ml; for mean molar mass axis)	Egl/BICD2 -RNA mean molar mass (Da)	Egl/BICD2 +Scram elution volume (ml; for differential refractive index axis)	Egl/BICD2 +Scram differential refractive index (normalised)	Egl/BICD2 +Scram elution volume (ml; for mean molar mass axis)	Egl/BICD2 +Scram mean molar mass (Da)	Egl/BICD2 +ILS elution volume (ml; for differential refractive index axis)	Egl/BICD2 +ILS differential refractive index (normalised)	Egl/BICD2 +ILS elution volume (ml; for mean molar mass axis)	Egl/BICD2 +ILS mean molar mass (Da)		Figure 6D	0.9 mg ml-1 Egl/BICD2 +ILS elution volume (ml; for differential refractive index axis)	0.9 mg ml-1 Egl/BICD2 +ILS differential refractive index (normalised)	0.9 mg ml-1 Egl/BICD2 +ILS elution volume (ml; for mean molar mass axis)	0.9 mg ml-1 Egl/BICD2 +ILS mean molar mass (Da)	0.5 mg ml-1 Egl/BICD2 +ILS elution volume (ml; for differential refractive index axis)	0.5 mg ml-1 Egl/BICD2 +ILS differential refractive index (normalised)	0.5 mg ml-1 Egl/BICD2 +ILS elution volume (ml; for mean molar mass axis)	0.5 mg ml-1 Egl/BICD2 +ILS mean molar mass (Da)	0.25 mg ml-1 Egl/BICD2 +ILS elution volume (ml; for differential refractive index axis)	0.25 mg ml-1 Egl/BICD2 +ILS differential refractive index (normalised)	0.25 mg ml-1 Egl/BICD2 +ILS elution volume (ml; for mean molar mass axis)	0.25 mg ml-1 Egl/BICD2 +ILS mean molar mass (Da)	0.1 mg ml-1 Egl/BICD2 +ILS elution volume (ml; for differential refractive index axis)
	269	403	266	388	245	360			9.00082	0.00638532	11.0329	182926	9.00587	0.00283586	10.7787	220395	9.00049	0.0064009	10.1007	361110			9.00699	0.0624571	10.7006	169653	9.00237	-0.0151409	10.6058	243968	9.00624	-0.00450726	10.0133	396137			9.00727	0.0106916	10.0079	393051	9.00049	0.0064009	10.1007	361110	9.00535	0.0223701	10.4025	315165	9.00466
	276	377	271	368	218	249			9.00871	0.00657246	11.0413	186498	9.01376	0.00277245	10.7871	224200	9.00839	0.00650115	10.1091	360629			9.01488	0.0632719	10.7259	170991	9.01026	-0.0151558	10.6142	242652	9.01414	-0.00447797	10.0301	393998			9.01517	0.0110385	10.0163	392243	9.00839	0.00650115	10.1091	360629	9.01325	0.0231076	10.4109	313867	9.01255
									9.01661	0.00662208	11.0497	186630	9.02166	0.00270903	10.7956	223699	9.01628	0.00662215	10.1175	359860			9.02278	0.0641052	10.7511	171527	9.01816	-0.0151708	10.6227	241520	9.02203	-0.00444868	10.047	391543			9.02306	0.011233	10.0247	391268	9.01628	0.00662215	10.1175	359860	9.02114	0.0231679	10.4193	312131	9.02045
									9.0245	0.00670822	11.0581	186466	9.02955	0.00241359	10.804	223387	9.02418	0.00702378	10.126	358865			9.03067	0.0654926	10.7764	172387	9.02605	-0.0152912	10.6311	240700	9.02993	-0.00453254	10.0638	389290			9.03096	0.0113592	10.0332	390290	9.02418	0.00702378	10.126	358865	9.02904	0.0232283	10.4278	310442	9.02834
									9.0324	0.00685103	11.0666	186213	9.03745	0.00251562	10.8124	222870	9.03207	0.00714806	10.1344	357893			9.03857	0.0663339	10.8017	173136	9.03395	-0.015222	10.6395	239808	9.03783	-0.00468355	10.0806	387599			9.03885	0.0115627	10.0416	389486	9.03207	0.00714806	10.1344	357893	9.03693	0.0232603	10.4362	309152	9.03624
									9.04029	0.00685802	11.075	185840	9.04534	0.00247524	10.8208	222232	9.03997	0.0071521	10.1428	357391			9.04646	0.0666058	10.8269	173936	9.04184	-0.0156515	10.6479	238947	9.04572	-0.00453802	10.0975	385374			9.04675	0.0118438	10.05	388547	9.03997	0.0071521	10.1428	357391	9.04483	0.0232923	10.4446	307678	9.04413
									9.04819	0.00683978	11.0834	185612	9.05324	0.00243486	10.8292	221693	9.04786	0.00715614	10.1512	357020			9.05436	0.0681976	10.8522	174533	9.04974	-0.015667	10.6563	238258	9.05362	-0.00452608	10.1143	383706			9.05464	0.011935	10.0584	387859	9.04786	0.00715614	10.1512	357020	9.05272	0.0230287	10.453	306295	9.05203
									9.05608	0.00682154	11.0918	185625	9.06113	0.00230772	10.8377	221192	9.05576	0.00726755	10.1596	356214			9.06225	0.069316	10.8774	175014	9.05763	-0.015473	10.6648	237519	9.06151	-0.00451414	10.1311	382897			9.06254	0.0120506	10.0668	387092	9.05576	0.00726755	10.1596	356214	9.06062	0.0235905	10.4614	304911	9.05992
									9.06398	0.00699088	11.1002	185536	9.06903	0.00205194	10.8461	220643	9.06365	0.00739043	10.168	355545			9.07015	0.0694577	10.9027	175534	9.06553	-0.0154552	10.6732	237030	9.06941	-0.00470598	10.148	381327			9.07043	0.0123638	10.0752	386502	9.06365	0.00739043	10.168	355545	9.06851	0.0238068	10.4698	303321	9.06782
									9.07187	0.00723172	11.1086	185324	9.07692	0.00184856	10.8545	220230	9.07155	0.0080253	10.1765	355331			9.07804	0.0705008	10.9279	176074	9.07342	-0.0154374	10.6816	236695	9.0773	-0.0046091	10.1648	379150			9.07833	0.0126466	10.0837	386039	9.07155	0.0080253	10.1765	355331	9.07641	0.0239392	10.4783	302428	9.07571
									9.07977	0.00745092	11.1171	185058	9.08482	0.00156045	10.8629	219899	9.07944	0.00804485	10.1849	354633			9.08594	0.0712465	10.9532	176353	9.08132	-0.0155083	10.69	236042	9.0852	-0.00459328	10.1816	377558			9.08622	0.012915	10.0921	385493	9.07944	0.00804485	10.1849	354633	9.0843	0.0240716	10.4867	301301	9.08361
									9.08766	0.00754185	11.1255	184930	9.09271	0.00156657	10.8713	219865	9.08734	0.00806439	10.1933	354736			9.09383	0.0720727	10.9784	176993	9.08921	-0.0155302	10.6984	235219	9.09309	-0.00457747	10.1985	375720			9.09412	0.0131982	10.1005	384988	9.08734	0.00806439	10.1933	354736	9.0922	0.024327	10.4951	299948	9.0915
									9.09556	0.00763279	11.1339	184943	9.10061	0.0015195	10.8797	220107	9.09523	0.00853731	10.2017	354539			9.10173	0.0733777	11.0037	177681	9.09711	-0.015422	10.7068	234508	9.10099	-0.00464272	10.2153	374061			9.10201	0.0134157	10.1089	384420	9.09523	0.00853731	10.2017	354539	9.10009	0.0243222	10.5035	298501	9.0994
									9.10345	0.00774674	11.1423	184763	9.1085	0.00144097	10.8882	220009	9.10313	0.00899254	10.2101	353433			9.10962	0.0741366	11.0289	178225	9.105	-0.015392	10.7153	233642	9.10888	-0.00445981	10.2322	372404			9.10991	0.0136662	10.1173	383925	9.10313	0.00899254	10.2101	353433	9.10799	0.0243173	10.5119	297155	9.10729
									9.11135	0.00781411	11.1507	184415	9.1164	0.00129451	10.8966	219746	9.11102	0.0092289	10.2186	352530			9.11752	0.0749384	11.0542	178390	9.1129	-0.0153621	10.7237	232849	9.11678	-0.00434443	10.249	371018			9.1178	0.0138656	10.1257	383314	9.11102	0.0092289	10.2186	352530	9.11588	0.0240466	10.5203	295870	9.11519
									9.11924	0.0078773	11.1591	184118	9.12429	0.00102384	10.905	219644	9.11892	0.00935291	10.227	351934			9.12541	0.0759093	11.0794	178780	9.12079	-0.0154104	10.7321	232321	9.12467	-0.00424033	10.2658	369725			9.1257	0.0142863	10.1342	382791	9.11892	0.00935291	10.227	351934	9.12378	0.0238558	10.5288	294190	9.12308
									9.12714	0.00808393	11.1676	183937	9.13219	0.00104484	10.9134	219616	9.12681	0.00939641	10.2354	350917			9.13331	0.076812	11.1047	179172	9.12869	-0.0158093	10.7405	231809	9.13257	-0.00372185	10.2827	368373			9.13359	0.0146211	10.1426	382368	9.12681	0.00939641	10.2354	350917	9.13167	0.0248445	10.5372	292661	9.13098
									9.13503	0.00834048	11.176	183941	9.14008	0.00106585	10.9218	219639	9.13471	0.00979681	10.2438	349774			9.1412	0.0776788	11.1299	179534	9.13658	-0.0156979	10.7489	231346	9.14046	-0.00338148	10.2995	366465			9.14149	0.0147084	10.151	381869	9.13471	0.00979681	10.2438	349774	9.13957	0.0251976	10.5456	291236	9.13887
									9.14293	0.00859987	11.1844	184081	9.14798	0.000602561	10.9302	219724	9.1426	0.0100218	10.2522	348884			9.1491	0.0789238	11.1552	179804	9.14448	-0.0156225	10.7573	230913	9.14836	-0.00321151	10.3163	364904			9.14938	0.0150271	10.1594	381498	9.1426	0.0100218	10.2522	348884	9.14746	0.0259371	10.554	289448	9.14677
									9.15082	0.00874236	11.1928	184231	9.15587	0.000279824	10.9387	219901	9.1505	0.0101819	10.2606	347994			9.15699	0.0800679	11.1804	180071	9.15237	-0.015547	10.7658	230528	9.15625	-0.00304154	10.3332	363526			9.15728	0.0154494	10.1678	381206	9.1505	0.0101819	10.2606	347994	9.15536	0.026125	10.5624	288182	9.15466
									9.15872	0.00901426	11.2012	184231	9.16377	3.9027e-05	10.9471	219976	9.15839	0.01046	10.2691	347007			9.16489	0.0807179	11.2057	180286	9.16027	-0.0154999	10.7742	230076	9.16415	-0.00289947	10.35	362017			9.16518	0.0156618	10.1762	380704	9.15839	0.01046	10.2691	347007	9.16326	0.0262579	10.5709	286998	9.16256
									9.16661	0.00932243	11.2096	184220	9.17166	-0.000169027	10.9555	219910	9.16629	0.0109534	10.2775	346160			9.17279	0.0816324	11.2309	180701	9.16816	-0.0155178	10.7826	229652	9.17204	-0.0027574	10.3668	360519			9.17307	0.0158527	10.1847	380266	9.16629	0.0109534	10.2775	346160	9.17115	0.0263408	10.5793	285453	9.17046
									9.17451	0.00937669	11.2181	184320	9.17956	-0.000240781	10.9639	219805	9.17418	0.0112591	10.2859	345473			9.18068	0.0821809	11.2562	180449	9.17606	-0.0154625	10.791	229328	9.17994	-0.00259941	10.3837	358777			9.18097	0.016239	10.1931	379607	9.17418	0.0112591	10.2859	345473	9.17905	0.0263987	10.5877	284075	9.17835
									9.1824	0.00940982	11.2265	184388	9.18745	-0.000312535	10.9723	219606	9.18208	0.0116834	10.2943	344735			9.18858	0.0831605	11.2814	180481	9.18395	-0.0154071	10.7994	229012	9.18783	-0.00206509	10.4005	357217			9.18886	0.016582	10.2015	378946	9.18208	0.0116834	10.2943	344735	9.18694	0.0260317	10.5961	282954	9.18625
									9.1903	0.00963696	11.2349	184381	9.19535	-0.000516001	10.9807	219536	9.18997	0.0119829	10.3027	344183			9.19647	0.0841354	11.3067	180188	9.19185	-0.0154526	10.8078	228681	9.19573	-0.00193801	10.4173	355950			9.19676	0.0169434	10.2099	378444	9.18997	0.0119829	10.3027	344183	9.19484	0.0256647	10.6045	281751	9.19414
									9.19819	0.009922	11.2433	184470	9.20324	-0.000967788	10.9892	219655	9.19787	0.0124616	10.3111	343661			9.20437	0.0844846	11.3319	179826	9.19974	-0.0154756	10.8163	228490	9.20362	-0.00186218	10.4342	354540			9.20465	0.0173861	10.2183	377979	9.19787	0.0124616	10.3111	343661	9.20273	0.0251994	10.6129	280177	9.20204
									9.20609	0.0102952	11.2517	184690	9.21114	-0.00128869	10.9976	219918	9.20576	0.0131996	10.3196	342929			9.21226	0.085445	11.3572	179480	9.20764	-0.0154986	10.8247	228279	9.21152	-0.00178636	10.451	353033			9.21255	0.017685	10.2268	377517	9.20576	0.0131996	10.3196	342929	9.21063	0.0255657	10.6214	278620	9.20993
									9.21398	0.0104722	11.2602	184867	9.21903	-0.00139987	11.006	220150	9.21366	0.0134736	10.328	342217			9.22016	0.0868102	11.3824	179157	9.21553	-0.0155827	10.8331	228040	9.21941	-0.0017642	10.4678	351789			9.22044	0.0180607	10.2352	377140	9.21366	0.0134736	10.328	342217	9.21852	0.0256738	10.6298	277292	9.21783
									9.22188	0.0105266	11.2686	184877	9.22693	-0.00137414	11.0144	220179	9.22155	0.013702	10.3364	341749			9.22805	0.0878313	11.4077	178454	9.22343	-0.0155522	10.8415	227815	9.22731	-0.000624301	10.4847	350320			9.22834	0.018389	10.2436	376751	9.22155	0.013702	10.3364	341749	9.22642	0.0256419	10.6382	276037	9.22572
									9.22977	0.0107899	11.277	184841	9.23482	-0.0013484	11.0228	220232	9.22945	0.0146169	10.3448	341164			9.23595	0.0883925	11.4329	177723	9.23132	-0.0155217	10.8499	227570	9.2352	-0.000536842	10.5015	349072			9.23623	0.018887	10.252	376392	9.22945	0.0146169	10.3448	341164	9.23431	0.02561	10.6466	274831	9.23362
									9.23767	0.011065	11.2854	184814	9.24272	-0.00143408	11.0312	220556	9.23734	0.0152548	10.3532	340111			9.24384	0.0890256	11.4582	176932	9.23922	-0.0154171	10.8583	227325	9.2431	-0.000449382	10.5183	347670			9.24413	0.0194034	10.2604	376184	9.23734	0.0152548	10.3532	340111	9.24221	0.0260071	10.655	274181	9.24151
									9.24556	0.0114003	11.2938	184734	9.25061	-0.00168034	11.0397	220952	9.24524	0.0153694	10.3616	339255			9.25174	0.0896955	11.4835	176125	9.24711	-0.0146525	10.8668	227093	9.25099	-0.000188214	10.5352	346109			9.25202	0.0198881	10.2688	376010	9.24524	0.0153694	10.3616	339255	9.2501	0.0268895	10.6634	272954	9.24941
									9.25346	0.0116418	11.3022	184612	9.25851	-0.00179461	11.0481	221114	9.25313	0.0157646	10.3701	338685			9.25963	0.0905532	11.5087	175356	9.25501	-0.0145678	10.8752	226878	9.25889	0.000220327	10.552	344743			9.25992	0.0202967	10.2773	375887	9.25313	0.0157646	10.3701	338685	9.258	0.0274424	10.6719	271809	9.2573
									9.26135	0.0117283	11.3107	184545	9.2664	-0.00189933	11.0565	221099	9.26103	0.0164834	10.3785	338080			9.26753	0.091572	11.534	173581	9.2629	-0.014489	10.8836	226599	9.26678	0.00109754	10.5688	343010			9.26781	0.0208212	10.2857	375645	9.26103	0.0164834	10.3785	338080	9.26589	0.0275512	10.6803	270820	9.2652
									9.26925	0.0117766	11.3191	184535	9.2743	-0.00200405	11.0649	220989	9.26892	0.0169461	10.3869	337230			9.27542	0.0921108	11.5592	171991	9.2708	-0.0144102	10.892	226333	9.27468	0.00184117	10.5857	341764			9.27571	0.0213617	10.2941	375453	9.26892	0.0169461	10.3869	337230	9.27379	0.0280358	10.6887	269838	9.27309
									9.27715	0.0118248	11.3275	184579	9.28219	-0.00211748	11.0733	220924	9.27682	0.0174911	10.3953	336563			9.28332	0.092539	11.5845	170114	9.27869	-0.0143023	10.9004	226065	9.28257	0.00248486	10.6025	340224			9.2836	0.0220136	10.3025	375102	9.27682	0.0174911	10.3953	336563	9.28168	0.0281099	10.6971	269019	9.28099
									9.28504	0.0120304	11.3359	184718	9.29009	-0.00209228	11.0818	220966	9.28472	0.0181498	10.4037	336068			9.29121	0.0935365	11.6097	168496	9.28659	-0.0141743	10.9089	225823	9.29047	0.00324395	10.6193	338780			9.2915	0.0225416	10.3109	374726	9.28472	0.0181498	10.4037	336068	9.28958	0.0283904	10.7055	268009	9.28888
									9.29294	0.0121955	11.3443	184912	9.29798	-0.00206707	11.0902	220999	9.29261	0.0187156	10.4121	335542			9.29911	0.094707	11.635	166368	9.29448	-0.0140987	10.9173	225656	9.29836	0.00369954	10.6362	337140			9.29939	0.0230948	10.3193	374288	9.29261	0.0187156	10.4121	335542	9.29747	0.0292059	10.7139	266928	9.29678
									9.30083	0.0122607	11.3527	185071	9.30588	-0.00256708	11.0986	221000	9.30051	0.0192295	10.4206	335061			9.307	0.0954704	11.6602	164417	9.30238	-0.0140232	10.9257	225501	9.30626	0.00443204	10.653	335509			9.30729	0.0236565	10.3278	373976	9.30051	0.0192295	10.4206	335061	9.30537	0.0300215	10.7224	265732	9.30467
									9.30873	0.0125631	11.3612	185163	9.31377	-0.00258338	11.107	221059	9.3084	0.0197391	10.429	334542			9.3149	0.0961541	11.6855	162086	9.31027	-0.013923	10.9341	225323	9.31415	0.00528157	10.6699	333935			9.31518	0.0242176	10.3362	373659	9.3084	0.0197391	10.429	334542	9.31326	0.0308545	10.7308	264454	9.31257
									9.31662	0.0128683	11.3696	185213	9.32167	-0.00257212	11.1154	221202	9.3163	0.0202804	10.4374	333646			9.32279	0.0968854			9.31817	-0.0138228	10.9425	225098	9.32205	0.00571741	10.6867	332303			9.32308	0.0248281	10.3446	373443	9.3163	0.0202804	10.4374	333646	9.32116	0.0310297	10.7392	263322	9.32046
									9.32452	0.0132685	11.378	185274	9.32957	-0.00256086	11.1238	221503	9.32419	0.0206781	10.4458	332521			9.33069	0.0980585			9.32606	-0.0133159	10.9509	224852	9.32994	0.00654252	10.7035	330499			9.33097	0.0255844	10.353	373131	9.32419	0.0206781	10.4458	332521	9.32905	0.0311281	10.7476	262091	9.32836
									9.33241	0.0133221	11.3864	185377	9.33746	-0.00301783	11.1323	221975	9.33209	0.0215152	10.4542	331709			9.33858	0.0986527			9.33396	-0.0131231	10.9594	224617	9.33784	0.00752765	10.7204	328690			9.33887	0.0263027	10.3614	372769	9.33209	0.0215152	10.4542	331709	9.33695	0.0312266	10.756	260927	9.33625
									9.34031	0.0135156	11.3948	185520	9.34536	-0.00299105	11.1407	222402	9.33998	0.0225841	10.4627	331137			9.34648	0.099297			9.34185	-0.0130456	10.9678	224479	9.34573	0.00829243	10.7372	327187			9.34676	0.0270393	10.3698	372482	9.33998	0.0225841	10.4627	331137	9.34484	0.0322135	10.7644	259843	9.34415
									9.3482	0.0137201	11.4032	185681	9.35325	-0.00299997	11.1491	222576	9.34788	0.0231654	10.4711	330503			9.35437	0.100036			9.34975	-0.0129682	10.9762	224520	9.35363	0.00959765	10.754	325356			9.35466	0.0279114	10.3783	372216	9.34788	0.0231654	10.4711	330503	9.35274	0.0326911	10.7729	258676	9.35204
									9.3561	0.0138173	11.4117	185824	9.36115	-0.00298668	11.1575	222497	9.35577	0.0239388	10.4795	329790			9.36227	0.100531			9.35764	-0.0129134	10.9846	224421	9.36152	0.0109446	10.7709	323673			9.36255	0.0286196	10.3867	371769	9.35577	0.0239388	10.4795	329790	9.36063	0.0331687	10.7813	257481	9.35994
									9.36399	0.0141814	11.4201	185985	9.36904	-0.00297338	11.1659	222370	9.36367	0.024922	10.4879	329228			9.37016	0.10115			9.36554	-0.013071	10.993	224211	9.36942	0.0121061	10.7877	321876			9.37045	0.0293571	10.3951	371242	9.36367	0.024922	10.4879	329228	9.36853	0.0339364	10.7897	256460	9.36783
									9.37189	0.0144722	11.4285	186139	9.37694	-0.00316619	11.1743	222346	9.37156	0.0257734	10.4963	328690			9.37806	0.101778			9.37344	-0.0127721	11.0014	224138	9.37731	0.0130843	10.8045	320214			9.37834	0.0302777	10.4035	370599	9.37156	0.0257734	10.4963	328690	9.37642	0.0352517	10.7981	255496	9.37573
									9.37978	0.0147603	11.4369	186218	9.38483	-0.00331504	11.1828	222288	9.37946	0.0268241	10.5047	328096			9.38595	0.102284			9.38133	-0.0123696	11.0099	224015	9.38521	0.0146319	10.8214	318492			9.38624	0.0313312	10.4119	369948	9.37946	0.0268241	10.5047	328096	9.38432	0.0358784	10.8065	254568	9.38362
									9.38768	0.0149024	11.4453	186304	9.39273	-0.00346389	11.1912	222233	9.38735	0.0277131	10.5132	327459			9.39385	0.102927			9.38923	-0.0121384	11.0183	223889	9.39311	0.0157688	10.8382	316727			9.39413	0.0323203	10.4203	369440	9.38735	0.0277131	10.5132	327459	9.39221	0.0361538	10.815	253820	9.39152
									9.39557	0.0150491	11.4537	186436	9.40062	-0.00376188	11.1996	222276	9.39525	0.0284688	10.5216	326755			9.40174	0.103791			9.39712	-0.0119072	11.0267	223839	9.401	0.0168116	10.855	315110			9.40203	0.0331869	10.4288	368921	9.39525	0.0284688	10.5216	326755	9.40011	0.0364292	10.8234	252948	9.39941
									9.40347	0.0152153	11.4622	186526	9.40852	-0.00360348	11.208	222282	9.40314	0.0290318	10.53	326043			9.40964	0.104562			9.40502	-0.0117992	11.0351	223747	9.4089	0.0181087	10.8719	313384			9.40992	0.0341237	10.4372	368517	9.40314	0.0290318	10.53	326043	9.408	0.0373434	10.8318	251863	9.40731
									9.41136	0.0153815	11.4706	186498	9.41641	-0.00355292	11.2164	222146	9.41104	0.0304114	10.5384	325342			9.41754	0.1049			9.41291	-0.0115304	11.0435	223693	9.41679	0.0195039	10.8887	311630			9.41782	0.0352709	10.4456	368065	9.41104	0.0304114	10.5384	325342	9.4159	0.0376245	10.8402	250928	9.4152
									9.41926	0.0156475	11.479	186418	9.42431	-0.00361963	11.2248	222027	9.41893	0.0317177	10.5468	324640			9.42543	0.106119			9.42081	-0.0112327	11.0519	223717	9.42469	0.0211808	10.9055	309849			9.42571	0.0365078	10.454	367601	9.41893	0.0317177	10.5468	324640	9.42379	0.0385228	10.8486	249891	9.4231
									9.42715	0.0162411	11.4874	186449	9.4322	-0.00368634	11.2333	222028	9.42683	0.0324484	10.5552	323950			9.43333	0.106877			9.4287	-0.0110488	11.0604	223703	9.43258	0.0230018	10.9224	308360			9.43361	0.0376066	10.4624	367203	9.42683	0.0324484	10.5552	323950	9.43169	0.0391449	10.857	248829	9.43099
									9.43505	0.0165565	11.4958	186705	9.4401	-0.00388647	11.2417	222002	9.43472	0.0337592	10.5637	323259			9.44122	0.107113			9.4366	-0.0108648	11.0688	223677	9.44048	0.02454	10.9392	306327			9.4415	0.0388122	10.4709	366802	9.43472	0.0337592	10.5637	323259	9.43958	0.0393367	10.8655	247927	9.43889
									9.44294	0.0167522	11.5043	186986	9.44799	-0.00385823	11.2501	221919	9.44262	0.0346939	10.5721	322464			9.44912	0.107326			9.44449	-0.0100286	11.0772	223679	9.44837	0.026125	10.956	304578			9.4494	0.0400948	10.4793	366380	9.44262	0.0346939	10.5721	322464	9.44748	0.0399196	10.8739	247209	9.44678
									9.45084	0.0169144	11.5127	187125	9.45589	-0.00369045	11.2585	221901	9.45051	0.0355418	10.5805	321545			9.45701	0.107926			9.45239	-0.00985343	11.0856	223461	9.45627	0.0279151	10.9729	302927			9.45729	0.0415035	10.4877	365982	9.45051	0.0355418	10.5805	321545	9.45537	0.0402371	10.8823	246454	9.45468
									9.45873	0.0171967	11.5211	187332	9.46378	-0.00369569	11.2669	221987	9.45841	0.0367539	10.5889	320687			9.46491	0.10841			9.46028	-0.00967827	11.094	223264	9.46416	0.030371	10.9897	300676			9.46519	0.0429026	10.4961	365595	9.45841	0.0367539	10.5889	320687	9.46327	0.0405547	10.8907	245551	9.46257
									9.46663	0.0175776	11.5295	187583	9.47168	-0.00370093	11.2754	222101	9.4663	0.0383677	10.5973	319984			9.4728	0.108627			9.46818	-0.00955132	11.1024	223132	9.47206	0.0323069	11.0065	298749			9.47308	0.0443869	10.5045	365178	9.4663	0.0383677	10.5973	319984	9.47116	0.0416382	10.8991	244647	9.47047
									9.47452	0.0179586	11.5379	187652	9.47957	-0.00379375	11.2838	222098	9.4742	0.0394462	10.6057	319306			9.4807	0.10913			9.47607	-0.00908034	11.1109	223098	9.47995	0.0345663	11.0234	296804			9.48098	0.0459791	10.5129	364758	9.4742	0.0394462	10.6057	319306	9.47906	0.0418831	10.9075	243765	9.47836
									9.48242	0.0182133	11.5463	187569	9.48747	-0.00386203	11.2922	221959	9.48209	0.0407811	10.6142	318518			9.48859	0.109591			9.48397	-0.00894843	11.1193	223157	9.48785	0.0372709	11.0402	294815			9.48888	0.0475751	10.5214	364325	9.48209	0.0407811	10.6142	318518	9.48695	0.0424074	10.916	242982	9.48626
									9.49031	0.0183646	11.5548	187573	9.49536	-0.00354118	11.3006	221864	9.48999	0.0422938	10.6226	317615			9.49649	0.1103			9.49186	-0.00881653	11.1277	223159	9.49574	0.0397006	11.057	293326			9.49677	0.0493508	10.5298	363813	9.48999	0.0422938	10.6226	317615	9.49485	0.0438943	10.9244	242401	9.49415
									9.49821	0.018512	11.5632	187732	9.50326	-0.00335645	11.309	221824	9.49788	0.0435339	10.631	316803			9.50438	0.110957			9.49976	-0.00849351	11.1361	223238	9.50364	0.0423254	11.0739	291451			9.50467	0.0511672	10.5382	363249	9.49788	0.0435339	10.631	316803	9.50274	0.0451447	10.9328	241884	9.50205
									9.5061	0.0187723	11.5716	187997	9.51115	-0.0031519	11.3174	221805	9.50578	0.0451963	10.6394	315960			9.51228	0.111561			9.50765	-0.00800883	11.1445	223410	9.51153	0.044628	11.0907	289657			9.51256	0.0530493	10.5466	362723	9.50578	0.0451963	10.6394	315960	9.51064	0.0455589	10.9412	241048	9.50994
									9.514	0.0190103	11.58	188161	9.51905	-0.00315259	11.3259	221889	9.51367	0.0468157	10.6478	315158			9.52017	0.111853			9.51555	-0.00755027	11.153	223479	9.51943	0.0472443	11.1076	288341			9.52046	0.0548537	10.555	362195	9.51367	0.0468157	10.6478	315158	9.51854	0.0462655	10.9496	240183	9.51784
									9.52189	0.0192718	11.5884	188250	9.52694	-0.00315328	11.3343	222161	9.52157	0.0487048	10.6562	314516			9.52807	0.112122			9.52344	-0.00719677	11.1614	223493	9.52732	0.0503515	11.1244	286467			9.52835	0.0567628	10.5634	361740	9.52157	0.0487048	10.6562	314516	9.52643	0.0463333	10.958	239378	9.52573
									9.52979	0.0193639	11.5968	188389	9.53484	-0.00319479	11.3427	222494	9.52946	0.0504268	10.6647	313868			9.53596	0.112588			9.53134	-0.00687665	11.1698	223440	9.53522	0.0539333	11.1412	284908			9.53625	0.0589813	10.5719	361226	9.52946	0.0504268	10.6647	313868	9.53433	0.0468242	10.9665	238545	9.53363
									9.53768	0.0195741	11.6053	188533	9.54273	-0.00323132	11.3511	222533	9.53736	0.0517101	10.6731	313155			9.54386	0.11319			9.53923	-0.00643917	11.1782	223537	9.54311	0.0567494	11.1581	283285			9.54414	0.0611128	10.5803	360710	9.53736	0.0517101	10.6731	313155	9.54222	0.0483698	10.9749	237667	9.54152
									9.54558	0.0197479	11.6137	188612	9.55063	-0.00327769	11.3595	222333	9.54525	0.0533383	10.6815	312458			9.55175	0.113651			9.54713	-0.00602673	11.1866	223616	9.55101	0.0594911	11.1749	281815			9.55204	0.0633896	10.5887	360195	9.54525	0.0533383	10.6815	312458	9.55012	0.0489327	10.9833	237026	9.54942
									9.55347	0.0199217	11.6221	188557	9.55852	-0.00330753	11.3679	222168	9.55315	0.0554935	10.6899	311691			9.55965	0.113805			9.55502	-0.0054512	11.195	223577	9.5589	0.0625401	11.1917	280135			9.55993	0.0657484	10.5971	359772	9.55315	0.0554935	10.6899	311691	9.55801	0.0494289	10.9917	236324	9.55731
									9.56137	0.0200517	11.6305	188378	9.56642	-0.00345576	11.3764	221930	9.56104	0.0574295	10.6983	310861			9.56754	0.114321			9.56292	-0.00515867	11.2035	223743	9.5668	0.0663789	11.2086	278613			9.56783	0.0681741	10.6055	359381	9.56104	0.0574295	10.6983	310861	9.56591	0.0504042	11.0001	235517	9.56521
									9.56926	0.0203039	11.6389	188281	9.57431	-0.00361043	11.3848	221660	9.56894	0.0593921	10.7068	310120			9.57544	0.114944			9.57081	-0.00472725	11.2119	223866	9.57469	0.0705468	11.2254	277236			9.57572	0.070784	10.6139	359006	9.56894	0.0593921	10.7068	310120	9.5738	0.0513511	11.0086	234819	9.5731
									9.57716	0.0206604	11.6473	188463	9.58221	-0.00364514	11.3932	221526	9.57683	0.0614362	10.7152	309547			9.58333	0.115112			9.57871	-0.00442096	11.2203	223921	9.58259	0.0741809	11.2422	275770			9.58362	0.0734791	10.6224	358603	9.57683	0.0614362	10.7152	309547	9.5817	0.0526842	11.017	234223	9.581
									9.58505	0.0207403	11.6558	188823	9.5901	-0.00367985	11.4016	221560	9.58473	0.063516	10.7236	309016			9.59123	0.115445			9.5866	-0.00386572	11.2287	223954	9.59048	0.0779618	11.2591	274327			9.59151	0.0762312	10.6308	358210	9.58473	0.063516	10.7236	309016	9.58959	0.0541829	11.0254	233555	9.58889
									9.59295	0.0211172	11.6642	189214	9.598	-0.00378685	11.41	221714	9.59262	0.0657452	10.732	308343			9.59912	0.115904			9.5945	-0.00351273	11.2371	223931	9.59838	0.0819906	11.2759	272792			9.59941	0.0792445	10.6392	357800	9.59262	0.0657452	10.732	308343	9.59749	0.0550192	11.0338	233021	9.59679
									9.60084	0.0212378	11.6726	189478	9.60589	-0.00383576	11.4184	221834	9.60052	0.068114	10.7404	307621			9.60702	0.116213			9.60239	-0.00295116	11.2455	223900	9.60627	0.0863739	11.2927	271116			9.6073	0.0824505	10.6476	357354	9.60052	0.068114	10.7404	307621	9.60538	0.056463	11.0422	232410	9.60468
									9.60874	0.0213584	11.681	189499	9.61379	-0.00369811	11.4269	221738	9.60841	0.0702192	10.7488	306857			9.61491	0.116531			9.61029	-0.00277718	11.254	223880	9.61417	0.0910042	11.3096	269791			9.6152	0.0855849	10.656	356894	9.60841	0.0702192	10.7488	306857	9.61328	0.0568943	11.0506	231952	9.61258
									9.61663	0.0215024	11.6894	189475	9.62168	-0.00357726	11.4353	221515	9.61631	0.0725174	10.7573	305924			9.62281	0.116662			9.61818	-0.00249372	11.2624	223939	9.62206	0.0957194	11.3264	268448			9.62309	0.088875	10.6645	356487	9.61631	0.0725174	10.7573	305924	9.62117	0.0578429	11.0591	231444	9.62047
									9.62453	0.0219613	11.6979	189576	9.62958	-0.00353815	11.4437	221381	9.6242	0.0752287	10.7657	304827			9.6307	0.116793			9.62608	-0.00176069	11.2708	223913	9.62996	0.100052	11.3432	267686			9.63099	0.0924217	10.6729	356042	9.6242	0.0752287	10.7657	304827	9.62907	0.0595104	11.0675	230870	9.62837
									9.63243	0.0220887	11.7063	189723	9.63747	-0.00349904	11.4521	221216	9.6321	0.0778876	10.7741	303807			9.6386	0.11722			9.63397	-0.000916012	11.2792	223967	9.63785	0.105315	11.3601	267069			9.63888	0.0961193	10.6813	355480	9.6321	0.0778876	10.7741	303807	9.63696	0.0606486	11.0759	230211	9.63627
									9.64032	0.022154	11.7147	189955	9.64537	-0.00345931	11.4605	220986	9.64	0.0806078	10.7825	302994			9.64649	0.117395			9.64187	-0.000534981	11.2876	224137	9.64575	0.110035	11.3769	266135			9.64678	0.0997532	10.6897	354850	9.64	0.0806078	10.7825	302994	9.64486	0.0615349	11.0843	229569	9.64416
									9.64822	0.0222193	11.7231	190181	9.65326	-0.00346536	11.4689	220871	9.64789	0.0835086	10.7909	302289			9.65439	0.117697			9.64976	-0.00020744	11.296	224144	9.65364	0.115682	11.3937	265551			9.65467	0.103379	10.6981	354195	9.64789	0.0835086	10.7909	302289	9.65275	0.0626043	11.0927	228852	9.65206
									9.65611	0.0225473	11.7315	190291	9.66116	-0.0034714	11.4774	220971	9.65579	0.0864818	10.7993	301524			9.66229	0.117923			9.65766	6.60299e-05	11.3045	224095	9.66154	0.121046	11.4106	264653			9.66257	0.107542	10.7065	353518	9.65579	0.0864818	10.7993	301524	9.66065	0.0632414	11.1011	228077	9.65995
									9.66401	0.0226651	11.7399	190327	9.66905	-0.00310823	11.4858	221232	9.66368	0.0894022	10.8078	300824			9.67018	0.118004			9.66555	0.000834552	11.3129	224211	9.66943	0.126525	11.4274	264053			9.67046	0.111727	10.715	352785	9.66368	0.0894022	10.8078	300824	9.66854	0.0647205	11.1096	227280	9.66785
									9.6719	0.0227442	11.7484	190458	9.67695	-0.00297489	11.4942	221250	9.67158	0.0924074	10.8162	300211			9.67808	0.118084			9.67345	0.00146829	11.3213	224458	9.67733	0.132483	11.4442	262955			9.67836	0.115819	10.7234	352039	9.67158	0.0924074	10.8162	300211	9.67644	0.0671171	11.118	226520	9.67574
									9.6798	0.0227565	11.7568	190741	9.68484	-0.00303587	11.5026	221023	9.67947	0.0959289	10.8246	299203			9.68597	0.118157			9.68134	0.00157059	11.3297	224502	9.68522	0.138351	11.4611	261794			9.68625	0.120244	10.7318	351334	9.67947	0.0959289	10.8246	299203	9.68433	0.0679871	11.1264	225864	9.68364
									9.68769	0.0228205	11.7652	191038	9.69274	-0.00309686	11.511	220962	9.68737	0.0994441	10.833	298075			9.69387	0.118276			9.68924	0.00205296	11.3381	224519	9.69312	0.144826	11.4779	261447			9.69415	0.124782	10.7402	350600	9.68737	0.0994441	10.833	298075	9.69223	0.0686605	11.1348	225400	9.69153
									9.69559	0.0229929	11.7736	191198	9.70063	-0.00329888	11.5195	220900	9.69526	0.102664	10.8414	297075			9.70176	0.118322			9.69713	0.00270798	11.3466	224758	9.70101	0.150964	11.4947	260833			9.70204	0.129557	10.7486	349921	9.69526	0.102664	10.8414	297075	9.70012	0.0704143	11.1432	224909	9.69943
									9.70348	0.0232334	11.782	191376	9.70853	-0.00293027	11.5279	220573	9.70316	0.106074	10.8498	296272			9.70966	0.118245			9.70503	0.00354392	11.355	224857	9.70891	0.157215					9.70994	0.134555	10.757	349416	9.70316	0.106074	10.8498	296272	9.70802	0.0720412	11.1516	224214	9.70732
									9.71138	0.0233442	11.7904	192094	9.71642	-0.00271642	11.5363	220237	9.71105	0.109594	10.8583	295440			9.71755	0.118168			9.71292	0.0043748	11.3634	224825	9.7168	0.164095					9.71783	0.139584	10.7655	348957	9.71105	0.109594	10.8583	295440	9.71591	0.0738676	11.1601	223676	9.71522
									9.71927	0.0235117	11.7989	193364	9.72432	-0.00231066	11.5447	220097	9.71895	0.112957	10.8667	294565			9.72545	0.118314			9.72082	0.0052379	11.3718	224738	9.7247	0.170513					9.72573	0.144768	10.7739	348382	9.71895	0.112957	10.8667	294565	9.72381	0.0759377	11.1685	223257	9.72311
									9.72717	0.0236396	11.8073	194347	9.73221	-0.00209037	11.5531	220098	9.72684	0.116687	10.8751	293831			9.73334	0.118308			9.72871	0.00552304	11.3802	224648	9.73259	0.176807					9.73362	0.150127	10.7823	347710	9.72684	0.116687	10.8751	293831	9.7317	0.0782246	11.1769	222774	9.73101
									9.73506	0.0237432	11.8157	194396	9.74011	-0.00204569	11.5615	220131	9.73474	0.121007	10.8835	293164			9.74124	0.118303			9.73661	0.00562821	11.3886	224371	9.74049	0.184081					9.74152	0.155674	10.7907	347034	9.73474	0.121007	10.8835	293164	9.7396	0.0796569	11.1853	222391	9.7389
									9.74296	0.0239359	11.8241	193797	9.748	-0.00198562	11.57	220133	9.74263	0.125156	10.8919	292426			9.74913	0.11864			9.7445	0.00636887	11.3971	224192	9.74838	0.19131					9.74941	0.161503	10.7991	346487	9.74263	0.125156	10.8919	292426	9.74749	0.0817085	11.1937	221918	9.7468
									9.75085	0.0239835	11.8325	191073	9.7559	-0.00166402	11.5784	220228	9.75053	0.129007	10.9004	291624			9.75703	0.118763			9.7524	0.0069847	11.4055	224243	9.75628	0.198962					9.75731	0.167444	10.8075	345950	9.75053	0.129007	10.9004	291624	9.75539	0.0833255	11.2021	221412	9.75469
									9.75875	0.0240312			9.76379	-0.00155781	11.5868	220517	9.75842	0.132815	10.9088	290762			9.76492	0.118832			9.76029	0.00763715	11.4139	224428	9.76418	0.206475					9.7652	0.173601	10.816	345226	9.75842	0.132815	10.9088	290762	9.76328	0.0847951	11.2106	220935	9.76259
									9.76664	0.0240427			9.77169	-0.00145159	11.5952	220730	9.76632	0.13722	10.9172	289855			9.77282	0.118901			9.76819	0.0084792	11.4223	224677	9.77207	0.214305					9.7731	0.180185	10.8244	344462	9.76632	0.13722	10.9172	289855	9.77118	0.0866565	11.219	220411	9.77048
									9.77454	0.0240314			9.77959	-0.00127673			9.77421	0.142121	10.9256	288952			9.78071	0.118985			9.77608	0.0090349	11.4307	224817	9.77997	0.222352					9.78099	0.186613	10.8328	343672	9.77421	0.142121	10.9256	288952	9.77907	0.088439	11.2274	220043	9.77838
									9.78243	0.0240201			9.78748	-0.00114963			9.78211	0.146977	10.934	288126			9.78861	0.119077			9.78398	0.00963926	11.4391	225166	9.78786	0.230323					9.78889	0.193276	10.8412	342832	9.78211	0.146977	10.934	288126	9.78697	0.091293	11.2358	219657	9.78627
									9.79033	0.0238689			9.79538	-0.00102252			9.79	0.152134	10.9424	287321			9.7965	0.119024			9.79187	0.0105746	11.4476	225573	9.79576	0.238829					9.79678	0.200226	10.8496	342086	9.79	0.152134	10.9424	287321	9.79486	0.0947325	11.2442	219084	9.79417
									9.79822	0.0238397			9.80327	-0.000596944			9.7979	0.156922	10.9509	286354			9.8044	0.11897			9.79977	0.0112572	11.456	225713	9.80365	0.247397					9.80468	0.207285	10.858	341351	9.7979	0.156922	10.9509	286354	9.80276	0.0970931	11.2527	218537	9.80206
									9.80612	0.023942			9.81117	-0.00028574			9.80579	0.161661	10.9593	285401			9.81229	0.118855			9.80767	0.0121648	11.4644	225815	9.81155	0.255868					9.81258	0.214546	10.8665	340575	9.80579	0.161661	10.9593	285401	9.81065	0.0985178	11.2611	218148	9.80996
									9.81401	0.0240406			9.81906	-0.000176593			9.81369	0.166796	10.9677	284674			9.82019	0.118919			9.81556	0.0129906	11.4728	226149	9.81944	0.26437					9.82047	0.221748	10.8749	339768	9.81369	0.166796	10.9677	284674	9.81855	0.100894	11.2695	217870	9.81785
									9.82191	0.0240886			9.82696	0.000170919			9.82158	0.172478	10.9761	284084			9.82808	0.118984			9.82346	0.0139726	11.4812	226366	9.82734	0.273104					9.82837	0.22925	10.8833	338966	9.82158	0.172478	10.9761	284084	9.82644	0.103652	11.2779	217385	9.82575
									9.8298	0.0240322			9.83485	0.000303858			9.82948	0.177866	10.9845	283188			9.83598	0.119185			9.83135	0.0144601	11.4896	226395	9.83523	0.282635					9.83626	0.236923	10.8917	338187	9.82948	0.177866	10.9845	283188	9.83434	0.106654	11.2863	216851	9.83364
									9.8377	0.0239759			9.84275	0.00073981			9.83737	0.183326	10.9929	282273			9.84387	0.119612			9.83925	0.0153203	11.4981	226444	9.84313	0.29171					9.84416	0.244837	10.9001	337371	9.83737	0.183326	10.9929	282273	9.84223	0.109326	11.2947	216570	9.84154
									9.84559	0.0239001			9.85064	0.000801899			9.84527	0.189026	11.0014	281603			9.85177	0.119906			9.84714	0.0158058			9.85102	0.30056					9.85205	0.252996	10.9086	336592	9.84527	0.189026	11.0014	281603	9.85013	0.111933	11.3032	216387	9.84943
									9.85349	0.0239909			9.85854	0.000846652			9.85316	0.19482	11.0098	280972			9.85966	0.119964			9.85504	0.0166226			9.85892	0.310106					9.85995	0.261346	10.917	335757	9.85316	0.19482	11.0098	280972	9.85802	0.115158	11.3116	216140	9.85733
									9.86138	0.024071			9.86643	0.000871056			9.86106	0.200559	11.0182	279969			9.86756	0.11996			9.86293	0.0176459			9.86681	0.319573					9.86784	0.269903	10.9254	334868	9.86106	0.200559	11.0182	279969	9.86592	0.117729	11.32	215651	9.86522
									9.86928	0.0241137			9.87433	0.00089546			9.86895	0.206547	11.0266	278874			9.87545	0.119956			9.87083	0.0187331			9.87471	0.329341					9.87574	0.278397	10.9338	333979	9.86895	0.206547	11.0266	278874	9.87382	0.120822	11.3284	215356	9.87312
									9.87717	0.0240735			9.88222	0.00148357			9.87685	0.213121	11.035	278055			9.88335	0.119908			9.87872	0.0198078			9.8826	0.338541					9.88363	0.287087	10.9422	333104	9.87685	0.213121	11.035	278055	9.88171	0.123967	11.3368	214781	9.88101
									9.88507	0.0240333			9.89012	0.00199705			9.88474	0.219147	11.0434	277331			9.89124	0.119638			9.88662	0.0202987			9.8905	0.347797					9.89153	0.296189	10.9506	332259	9.88474	0.219147	11.0434	277331	9.88961	0.126799	11.3452	214354	9.88891
									9.89296	0.0239231			9.89801	0.0020731			9.89264	0.225456	11.0519	276525			9.89914	0.119758			9.89451	0.0209476			9.89839	0.357492					9.89942	0.305446	10.9591	331331	9.89264	0.225456	11.0519	276525	9.8975	0.130631	11.3537	213946	9.8968
									9.90086	0.0239026			9.90591	0.00247673			9.90053	0.232028	11.0603	275729			9.90704	0.119882			9.90241	0.0225958			9.90629	0.36718					9.90732	0.314928	10.9675	330392	9.90053	0.232028	11.0603	275729	9.9054	0.134258	11.3621	213437	9.9047
									9.90875	0.023893			9.9138	0.00272498			9.90843	0.238655	11.0687	274905			9.91493	0.120005			9.9103	0.0238515			9.91418	0.377411					9.91521	0.324315	10.9759	329494	9.90843	0.238655	11.0687	274905	9.91329	0.137764	11.3705	213085	9.91259
									9.91665	0.0238834			9.9217	0.00289847			9.91632	0.245571	11.0771	273952			9.92283	0.120016			9.9182	0.0244408			9.92208	0.387789					9.92311	0.333852	10.9843	328615	9.91632	0.245571	11.0771	273952	9.92119	0.141559	11.3789	212955	9.92049
									9.92454	0.0237855			9.92959	0.00325373			9.92422	0.252297	11.0855	273100			9.93072	0.120027			9.92609	0.0251692			9.92997	0.398198					9.931	0.343801	10.9927	327707	9.92422	0.252297	11.0855	273100	9.92908	0.143958	11.3873	212674	9.92838
									9.93244	0.0236914			9.93749	0.00350733			9.93211	0.259348	11.0939	272229			9.93862	0.119984			9.93399	0.0263236			9.93787	0.408825					9.9389	0.353879	11.0011	326804	9.93211	0.259348	11.0939	272229	9.93698	0.147735	11.3957	212264	9.93628
									9.94033	0.023546			9.94538	0.00404981			9.94001	0.266642	11.1024	271351			9.94651	0.120054			9.94188	0.0276254			9.94576	0.418794					9.94679	0.364178	11.0096	325900	9.94001	0.266642	11.1024	271351	9.94487	0.151892	11.4042	211919	9.94417
									9.94823	0.0234381			9.95328	0.00458511			9.9479	0.27406	11.1108	270714			9.95441	0.120122			9.94978	0.0285927			9.95366	0.429153					9.95469	0.374299	11.018	324955	9.9479	0.27406	11.1108	270714	9.95277	0.155539	11.4126	211618	9.95207
									9.95612	0.0233878			9.96117	0.00523605			9.9558	0.281422	11.1192	270006			9.9623	0.120192			9.95767	0.0302701			9.96155	0.439228					9.96258	0.384521	11.0264	323982	9.9558	0.281422	11.1192	270006	9.96066	0.159772	11.421	211152	9.95996
									9.96402	0.0233374			9.96907	0.00591225			9.96369	0.288739	11.1276	269027			9.9702	0.120217			9.96557	0.0320246			9.96945	0.449368					9.97048	0.395331	11.0348	323044	9.96369	0.288739	11.1276	269027	9.96856	0.1639	11.4294	210611	9.96786
									9.97191	0.0232141			9.97696	0.00615551			9.97159	0.296399	11.136	268159			9.97809	0.120242			9.97346	0.0332209			9.97734	0.460412					9.97837	0.40601	11.0432	322066	9.97159	0.296399	11.136	268159	9.97645	0.167425	11.4378	210193	9.97575
									9.97981	0.0230517			9.98486	0.00636452			9.97949	0.304034	11.1445	267311			9.98599	0.120091			9.98136	0.0348158			9.98524	0.471531					9.98627	0.416651	11.0516	321119	9.97949	0.304034	11.1445	267311	9.98435	0.171319	11.4462	209606	9.98365
									9.98771	0.0231766			9.99275	0.0067563			9.98738	0.312062	11.1529	266511			9.99388	0.120142			9.98925	0.0360723			9.99313	0.482009					9.99416	0.42695	11.0601	320148	9.98738	0.312062	11.1529	266511	9.99224	0.175871	11.4547	209145	9.99154
									9.9956	0.0231599			10.0006	0.00725743			9.99528	0.320121	11.1613	265864			10.0018	0.120147			9.99715	0.0371203			10.001	0.492911					10.0021	0.437393	11.0685	319146	9.99528	0.320121	11.1613	265864	10.0001	0.180052	11.4631	208646	9.99944
									10.0035	0.0231432			10.0085	0.00772466			10.0032	0.327777	11.1697	265162			10.0097	0.120152			10.005	0.0388468			10.0089	0.504087					10.01	0.448544	11.0769	317982	10.0032	0.327777	11.1697	265162	10.008	0.184589	11.4715	208284	10.0073
									10.0114	0.0230805			10.0164	0.00837148			10.0111	0.336239	11.1781	264205			10.0176	0.120549			10.0129	0.0406696			10.0168	0.51482					10.0178	0.459492	11.0853	316969	10.0111	0.336239	11.1781	264205	10.0159	0.189176	11.4799	208020	10.0152
									10.0193	0.0230481			10.0243	0.00895145			10.019	0.345104	11.1865	263308			10.0255	0.120864			10.0208	0.042079			10.0247	0.525116					10.0257	0.470828	11.0937	315992	10.019	0.345104	11.1865	263308	10.0238	0.194096	11.4883	207598	10.0231
									10.0272	0.023003			10.0322	0.00985717			10.0269	0.353446	11.195	262499			10.0334	0.120913			10.0287	0.0440368			10.0326	0.536017					10.0336	0.482221	11.1021	315008	10.0269	0.353446	11.195	262499	10.0317	0.198477	11.4968	207286	10.031
									10.0351	0.0229291			10.0401	0.0103859			10.0348	0.361905	11.2034	261457			10.0413	0.120931			10.0366	0.0462745			10.0405	0.546586					10.0415	0.493541	11.1106	314088	10.0348	0.361905	11.2034	261457	10.0396	0.203285	11.5052	207253	10.0389
									10.043	0.0227357			10.048	0.0108633			10.0426	0.370226	11.2118	260750			10.0491	0.12095			10.0445	0.0478946			10.0484	0.557423					10.0494	0.505177	11.119	313072	10.0426	0.370226	11.2118	260750	10.0475	0.208843	11.5136	207312	10.0468
									10.0509	0.022555			10.0559	0.0111713			10.0505	0.378954	11.2202	260180			10.057	0.12136			10.0524	0.0497348			10.0563	0.568374					10.0573	0.516552	11.1274	312044	10.0505	0.378954	11.2202	260180	10.0554	0.213228	11.522	207296	10.0547
									10.0588	0.0224285			10.0638	0.0114827			10.0584	0.38797	11.2286	259578			10.0649	0.121515			10.0603	0.0518385			10.0642	0.579246					10.0652	0.52814	11.1358	311003	10.0584	0.38797	11.2286	259578	10.0633	0.218345	11.5304	207204	10.0626
									10.0667	0.0223111			10.0717	0.0117802			10.0663	0.396882	11.237	258662			10.0728	0.121632			10.0682	0.0536338			10.0721	0.589822					10.0731	0.539636	11.1442	309947	10.0663	0.396882	11.237	258662	10.0712	0.223424	11.5388	207046	10.0705
									10.0746	0.022231			10.0796	0.0124698			10.0742	0.405518	11.2455	257598			10.0807	0.121941			10.0761	0.0553687			10.08	0.600327					10.081	0.550909	11.1527	308858	10.0742	0.405518	11.2455	257598	10.0791	0.227827	11.5473	207076	10.0784
									10.0824	0.0222647			10.0875	0.0129407			10.0821	0.414709	11.2539	256886			10.0886	0.122157			10.084	0.0574766			10.0879	0.611075					10.0889	0.562617	11.1611	307627	10.0821	0.414709	11.2539	256886	10.087	0.232694	11.5557	206802	10.0863
									10.0903	0.0222627			10.0954	0.0135382			10.09	0.424034	11.2623	256313			10.0965	0.122414			10.0919	0.059859			10.0958	0.621832					10.0968	0.574208	11.1695	306474	10.09	0.424034	11.2623	256313	10.0949	0.239078	11.5641	206259	10.0942
									10.0982	0.0222606			10.1033	0.0144641			10.0979	0.433548	11.2707	255855			10.1044	0.123059			10.0998	0.0623289			10.1037	0.631712					10.1047	0.586019	11.1779	305324	10.0979	0.433548	11.2707	255855	10.1028	0.24457	11.5725	205784	10.1021
									10.1061	0.0221366			10.1112	0.015373			10.1058	0.442506	11.2791	255260			10.1123	0.123447			10.1077	0.0643368			10.1116	0.642196					10.1126	0.59772	11.1863	304325	10.1058	0.442506	11.2791	255260	10.1107	0.250175	11.5809	205155	10.11
									10.114	0.0221507			10.1191	0.0157114			10.1137	0.451869	11.2875	254238			10.1202	0.123573			10.1156	0.0665247			10.1195	0.652624					10.1205	0.609165	11.1947	303392	10.1137	0.451869	11.2875	254238	10.1186	0.254935	11.5893	204673	10.1179
									10.1219	0.0221405			10.127	0.0159305			10.1216	0.461613	11.296	252961			10.1281	0.123884			10.1235	0.0692643			10.1274	0.661618					10.1284	0.62091	11.2032	302515	10.1216	0.461613	11.296	252961	10.1265	0.260768	11.5978	203915	10.1258
									10.1298	0.0221303			10.1349	0.0165614			10.1295	0.471487	11.3044	251940			10.136	0.124167			10.1314	0.0720054			10.1352	0.670656					10.1363	0.632277	11.2116	301566	10.1295	0.471487	11.3044	251940	10.1344	0.266944	11.6062	203083	10.1337
									10.1377	0.0221204			10.1428	0.0172444			10.1374	0.481258	11.3128	251221			10.1439	0.124504			10.1393	0.07479			10.1431	0.680425					10.1442	0.643694	11.22	300632	10.1374	0.481258	11.3128	251221	10.1422	0.272794	11.6146	202664	10.1416
									10.1456	0.022152			10.1507	0.0179535			10.1453	0.490531	11.3212	250685			10.1518	0.125246			10.1472	0.077259			10.151	0.690765					10.1521	0.655335	11.2284	299813	10.1453	0.490531	11.3212	250685	10.1501	0.277983	11.623	202145	10.1494
									10.1535	0.0221666			10.1585	0.0189995			10.1532	0.499693	11.3296	250341			10.1597	0.125554			10.155	0.0802711			10.1589	0.701014					10.16	0.666709	11.2368	298953	10.1532	0.499693	11.3296	250341	10.158	0.283326	11.6314	201692	10.1573
									10.1614	0.0221049			10.1664	0.0197266			10.1611	0.509709	11.338	249940			10.1676	0.126274			10.1629	0.0835318			10.1668	0.710971					10.1679	0.677894	11.2452	298120	10.1611	0.509709	11.338	249940	10.1659	0.289271	11.6398	201137	10.1652
									10.1693	0.0220431			10.1743	0.0201502			10.169	0.519608	11.3465	249336			10.1755	0.126685			10.1708	0.0860966			10.1747	0.720084					10.1758	0.689266	11.2537	297313	10.169	0.519608	11.3465	249336	10.1738	0.296189	11.6483	200333	10.1731
									10.1772	0.0220669			10.1822	0.020912			10.1769	0.528968	11.3549	248824			10.1834	0.126886			10.1787	0.0889583			10.1826	0.729106					10.1836	0.700211	11.2621	296524	10.1769	0.528968	11.3549	248824	10.1817	0.302168	11.6567	199968	10.181
									10.1851	0.0220958			10.1901	0.0219709			10.1848	0.539253	11.3633	248407			10.1913	0.127171			10.1866	0.0925596			10.1905	0.738423					10.1915	0.711332	11.2705	295628	10.1848	0.539253	11.3633	248407	10.1896	0.30889	11.6651	199741	10.1889
									10.193	0.022198			10.198	0.022724			10.1927	0.548648	11.3717	247299			10.1992	0.128053			10.1945	0.0963639			10.1984	0.748093					10.1994	0.7224			10.1927	0.548648	11.3717	247299	10.1975	0.316573	11.6735	199200	10.1968
									10.2009	0.0221988			10.2059	0.0233554			10.2005	0.558087	11.3801	245968			10.2071	0.129168			10.2024	0.0998513			10.2063	0.756962					10.2073	0.733077			10.2005	0.558087	11.3801	245968	10.2054	0.322848	11.6819	198626	10.2047
									10.2088	0.0221996			10.2138	0.0244147			10.2084	0.568055	11.3886	244909			10.2149	0.129714			10.2103	0.103175			10.2142	0.76637					10.2152	0.743625			10.2084	0.568055	11.3886	244909	10.2133	0.328663	11.6904	198512	10.2126
									10.2167	0.0221954			10.2217	0.0256776			10.2163	0.578085	11.397	243760			10.2228	0.130005			10.2182	0.1075			10.2221	0.775478					10.2231	0.754222			10.2163	0.578085	11.397	243760	10.2212	0.335645	11.6988	198540	10.2205
									10.2246	0.0220876			10.2296	0.0262823			10.2242	0.587811	11.4054	242897			10.2307	0.13091			10.2261	0.111982			10.23	0.783985					10.231	0.764606			10.2242	0.587811	11.4054	242897	10.2291	0.341809	11.7072	198309	10.2284
									10.2325	0.0222159			10.2375	0.0271782			10.2321	0.597674	11.4138	242205			10.2386	0.131916			10.234	0.116053			10.2379	0.792275					10.2389	0.774634			10.2321	0.597674	11.4138	242205	10.237	0.348055	11.7156	197824	10.2363
									10.2403	0.0223237			10.2454	0.0286655			10.24	0.607766	11.4222	241557			10.2465	0.132824			10.2419	0.120811			10.2458	0.80029					10.2468	0.784756			10.24	0.607766	11.4222	241557	10.2449	0.3553	11.724	197515	10.2442
									10.2482	0.0224311			10.2533	0.0295961			10.2479	0.617566	11.4306	240989			10.2544	0.13383			10.2498	0.125378			10.2537	0.808883					10.2547	0.794567			10.2479	0.617566	11.4306	240989	10.2528	0.362351	11.7324	196966	10.2521
									10.2561	0.022574			10.2612	0.0303433			10.2558	0.626988	11.4391	240299			10.2623	0.134565			10.2577	0.129962			10.2616	0.817189					10.2626	0.804037			10.2558	0.626988	11.4391	240299	10.2607	0.369324	11.7409	196726	10.26
									10.264	0.0226426			10.2691	0.0313687			10.2637	0.636606	11.4475	239612			10.2702	0.13569			10.2656	0.13464			10.2695	0.824763					10.2705	0.813489			10.2637	0.636606	11.4475	239612	10.2686	0.37654	11.7493	196786	10.2679
									10.2719	0.0227111			10.277	0.0326217			10.2716	0.64645	11.4559	238970			10.2781	0.136654			10.2735	0.139847			10.2774	0.832413					10.2784	0.822725			10.2716	0.64645	11.4559	238970	10.2765	0.383263	11.7577	196296	10.2758
									10.2798	0.0229789			10.2849	0.0337108			10.2795	0.655986	11.4643	238498			10.286	0.137948			10.2814	0.145573			10.2853	0.840038					10.2863	0.832093			10.2795	0.655986	11.4643	238498	10.2844	0.389185	11.7661	195554	10.2837
									10.2877	0.0232141			10.2928	0.0345318			10.2874	0.665425	11.4727	237873			10.2939	0.139558			10.2893	0.151092			10.2931	0.848303					10.2942	0.840964			10.2874	0.665425	11.4727	237873	10.2923	0.395795	11.7745	195281	10.2916
									10.2956	0.0232809			10.3007	0.0357131			10.2953	0.675051	11.4811	237233			10.3018	0.140546			10.2972	0.156876			10.301	0.855677					10.3021	0.849778			10.2953	0.675051	11.4811	237233	10.3002	0.403501	11.7829	195467	10.2995
									10.3035	0.0234133			10.3086	0.0371024			10.3032	0.684558	11.4896	236886			10.3097	0.141671			10.3051	0.162965			10.3089	0.862697					10.31	0.858245			10.3032	0.684558	11.4896	236886	10.308	0.41077	11.7914	195397	10.3073
									10.3114	0.0235997			10.3165	0.0381863			10.3111	0.694097	11.498	236500			10.3176	0.1429			10.313	0.169267			10.3168	0.869765					10.3179	0.866689			10.3111	0.694097	11.498	236500	10.3159	0.41705	11.7998	194850	10.3152
									10.3193	0.0237255			10.3243	0.0396137			10.319	0.703595	11.5064	236104			10.3255	0.143962			10.3208	0.175284			10.3247	0.876417					10.3258	0.874599			10.319	0.703595	11.5064	236104	10.3238	0.424223			10.3231
									10.3272	0.0238906			10.3322	0.0410421			10.3269	0.71312	11.5148	235467			10.3334	0.145093			10.3287	0.182108			10.3326	0.882856					10.3337	0.882553			10.3269	0.71312	11.5148	235467	10.3317	0.432675			10.331
									10.3351	0.024403			10.3401	0.042229			10.3348	0.722556	11.5232	234768			10.3413	0.146432			10.3366	0.188921			10.3405	0.889584					10.3415	0.889945			10.3348	0.722556	11.5232	234768	10.3396	0.439235			10.3389
									10.343	0.0246326			10.348	0.0435375			10.3427	0.731262	11.5316	234397			10.3492	0.148199			10.3445	0.195934			10.3484	0.895853					10.3494	0.897289			10.3427	0.731262	11.5316	234397	10.3475	0.445423			10.3468
									10.3509	0.0250967			10.3559	0.0452177			10.3506	0.740559	11.5401	233632			10.3571	0.149986			10.3524	0.20304			10.3563	0.901644					10.3573	0.904662			10.3506	0.740559	11.5401	233632	10.3554	0.453459			10.3547
									10.3588	0.0253503			10.3638	0.0470206			10.3585	0.749581	11.5485	232358			10.365	0.151491			10.3603	0.210316			10.3642	0.907528					10.3652	0.911686			10.3585	0.749581	11.5485	232358	10.3633	0.460715			10.3626
									10.3667	0.0255569			10.3717	0.0490327			10.3663	0.758419	11.5569	231038			10.3728	0.153453			10.3682	0.218373			10.3721	0.913294					10.3731	0.918126			10.3663	0.758419	11.5569	231038	10.3712	0.467763			10.3705
									10.3746	0.0257308			10.3796	0.0510236			10.3742	0.767223	11.5653	229843			10.3807	0.155371			10.3761	0.226454			10.38	0.918831					10.381	0.924328			10.3742	0.767223	11.5653	229843	10.3791	0.475229			10.3784
									10.3825	0.0261566			10.3875	0.0526098			10.3821	0.776001	11.5737	229183			10.3886	0.157463			10.384	0.234222			10.3879	0.924236					10.3889	0.930742			10.3821	0.776001	11.5737	229183	10.387	0.482317			10.3863
									10.3904	0.0267062			10.3954	0.0543391			10.39	0.784686					10.3965	0.159803			10.3919	0.243018			10.3958	0.929379					10.3968	0.936826			10.39	0.784686	11.5822	229118	10.3949	0.489709			10.3942
									10.3983	0.0272606			10.4033	0.0569295			10.3979	0.793222					10.4044	0.161944			10.3998	0.25205			10.4037	0.934172					10.4047	0.942931			10.3979	0.793222	11.5906	229085	10.4028	0.496697			10.4021
									10.4061	0.0277653			10.4112	0.0594291			10.4058	0.801698					10.4123	0.164279			10.4077	0.261013			10.4116	0.938554					10.4126	0.948683			10.4058	0.801698	11.599	228479	10.4107	0.504094			10.41
									10.414	0.0282946			10.4191	0.0612643			10.4137	0.809957					10.4202	0.166603			10.4156	0.270295			10.4195	0.943369					10.4205	0.953794			10.4137	0.809957	11.6074	227804	10.4186	0.512203			10.4179
									10.4219	0.0289565			10.427	0.0632995			10.4216	0.817986					10.4281	0.169784			10.4235	0.27988			10.4274	0.947991					10.4284	0.958729			10.4216	0.817986	11.6158	227384	10.4265	0.52043			10.4258
									10.4298	0.0294269			10.4349	0.0659977			10.4295	0.825785					10.436	0.172991			10.4314	0.289466			10.4353	0.952191					10.4363	0.963137			10.4295	0.825785			10.4344	0.527875			10.4337
									10.4377	0.0299635			10.4428	0.0690279			10.4374	0.833736					10.4439	0.175515			10.4393	0.299932			10.4432	0.956601					10.4442	0.967454			10.4374	0.833736			10.4423	0.53564			10.4416
									10.4456	0.0306071			10.4507	0.0720459			10.4453	0.841889					10.4518	0.178618			10.4472	0.309921			10.451	0.960598					10.4521	0.971639			10.4453	0.841889			10.4502	0.543656			10.4495
									10.4535	0.0313375			10.4586	0.0749078			10.4532	0.849541					10.4597	0.181854			10.4551	0.320362			10.4589	0.964052					10.46	0.97536			10.4532	0.849541			10.4581	0.550801			10.4574
									10.4614	0.0320403			10.4665	0.0779344			10.4611	0.856616					10.4676	0.185665			10.463	0.331201			10.4668	0.967211					10.4679	0.978784			10.4611	0.856616			10.4659	0.55951			10.4652
									10.4693	0.0329015			10.4744	0.0815383			10.469	0.863542					10.4755	0.189549			10.4709	0.341972			10.4747	0.97056					10.4758	0.982023			10.469	0.863542			10.4738	0.567115			10.4731
									10.4772	0.0336684			10.4822	0.0852614			10.4769	0.870995					10.4834	0.193139			10.4787	0.353526			10.4826	0.973882					10.4837	0.98503			10.4769	0.870995			10.4817	0.573646			10.481
									10.4851	0.0344356			10.4901	0.0886175			10.4848	0.877945					10.4913	0.197827			10.4866	0.365008			10.4905	0.976635					10.4916	0.987653			10.4848	0.877945			10.4896	0.581771			10.4889
									10.493	0.0354724			10.498	0.0922812			10.4927	0.884329					10.4992	0.202025			10.4945	0.37632			10.4984	0.979222					10.4995	0.990109			10.4927	0.884329			10.4975	0.589465			10.4968
									10.5009	0.0365024			10.5059	0.0966192			10.5006	0.890582					10.5071	0.206586			10.5024	0.388425			10.5063	0.981652					10.5073	0.992294			10.5006	0.890582			10.5054	0.597528			10.5047
									10.5088	0.0376087			10.5138	0.101077			10.5085	0.896812					10.515	0.21166			10.5103	0.400694			10.5142	0.983863					10.5152	0.994089			10.5085	0.896812			10.5133	0.605111			10.5126
									10.5167	0.0387621			10.5217	0.105309			10.5164	0.903096					10.5229	0.216716			10.5182	0.412901			10.5221	0.986046					10.5231	0.995589			10.5164	0.903096			10.5212	0.612619			10.5205
									10.5246	0.0399286			10.5296	0.110538			10.5242	0.909168					10.5308	0.222042			10.5261	0.424942			10.53	0.987996					10.531	0.997051			10.5242	0.909168			10.5291	0.620994			10.5284
									10.5325	0.0412239			10.5375	0.115758			10.5321	0.914954					10.5386	0.227869			10.534	0.437568			10.5379	0.990373					10.5389	0.998365			10.5321	0.914954			10.537	0.629013			10.5363
									10.5404	0.0427802			10.5454	0.121162			10.54	0.920718					10.5465	0.233707			10.5419	0.449946			10.5458	0.992021					10.5468	0.999278			10.54	0.920718			10.5449	0.636785			10.5442
									10.5483	0.044066			10.5533	0.126376			10.5479	0.926173					10.5544	0.239647			10.5498	0.462523			10.5537	0.993154					10.5547	0.999901			10.5479	0.926173			10.5528	0.645576			10.5521
									10.5562	0.0456282			10.5612	0.132128			10.5558	0.931299					10.5623	0.245744			10.5577	0.475856			10.5616	0.995103					10.5626	0.999992			10.5558	0.931299			10.5607	0.653231			10.56
									10.564	0.0471289			10.5691	0.138567			10.5637	0.936122					10.5702	0.252707			10.5656	0.489632			10.5695	0.996723					10.5705	1			10.5637	0.936122			10.5686	0.660247			10.5679
									10.5719	0.0487184			10.577	0.144983			10.5716	0.940942					10.5781	0.259865			10.5735	0.502761			10.5774	0.997085					10.5784	0.999813			10.5716	0.940942			10.5765	0.668314			10.5758
									10.5798	0.0507653			10.5849	0.151851			10.5795	0.945888					10.586	0.266884			10.5814	0.516155			10.5853	0.997764					10.5863	0.999625			10.5795	0.945888			10.5844	0.676304			10.5837
									10.5877	0.0524871			10.5928	0.158984			10.5874	0.950576					10.5939	0.274685			10.5893	0.529005			10.5932	0.998773					10.5942	0.999045			10.5874	0.950576			10.5923	0.683441			10.5916
									10.5956	0.0544293			10.6007	0.166327			10.5953	0.954827					10.6018	0.282884			10.5972	0.542228			10.6011	0.999228					10.6021	0.998308			10.5953	0.954827			10.6002	0.690423			10.5995
									10.6035	0.0566673			10.6086	0.174259			10.6032	0.958853					10.6097	0.291345			10.6051	0.556328			10.609	0.999619					10.61	0.997273			10.6032	0.958853			10.6081	0.697954			10.6074
									10.6114	0.0590238			10.6165	0.18243			10.6111	0.962553					10.6176	0.299953			10.613	0.570528			10.6168	0.999914					10.6179	0.996051			10.6111	0.962553			10.616	0.706603			10.6153
									10.6193	0.0613273			10.6244	0.190836			10.619	0.96668					10.6255	0.308917			10.6209	0.584687			10.6247	0.999957					10.6258	0.994614			10.619	0.96668			10.6239	0.714622			10.6232
									10.6272	0.0640472			10.6323	0.199816			10.6269	0.97017					10.6334	0.318743			10.6288	0.597904			10.6326	1					10.6337	0.992796			10.6269	0.97017			10.6317	0.722364			10.631
									10.6351	0.0669032			10.6401	0.209054			10.6348	0.973314					10.6413	0.328227			10.6366	0.61151			10.6405	0.999924					10.6416	0.990845			10.6348	0.973314			10.6396	0.730158			10.6389
									10.643	0.0694234			10.648	0.218827			10.6427	0.976765					10.6492	0.338104			10.6445	0.625248			10.6484	0.999848					10.6495	0.988777			10.6427	0.976765			10.6475	0.73796			10.6468
									10.6509	0.0721591			10.6559	0.228857			10.6506	0.979766					10.6571	0.348458			10.6524	0.638183			10.6563	0.999163					10.6574	0.986572			10.6506	0.979766			10.6554	0.744298			10.6547
									10.6588	0.0753161			10.6638	0.239248			10.6585	0.982219					10.665	0.358697			10.6603	0.651254			10.6642	0.998893					10.6652	0.983966			10.6585	0.982219			10.6633	0.75243			10.6626
									10.6667	0.0786815			10.6717	0.250076			10.6664	0.984673					10.6729	0.369666			10.6682	0.664716			10.6721	0.997881					10.6731	0.981155			10.6664	0.984673			10.6712	0.760352			10.6705
									10.6746	0.0822332			10.6796	0.26131			10.6743	0.986954					10.6808	0.381139			10.6761	0.677873			10.68	0.996775					10.681	0.978298			10.6743	0.986954			10.6791	0.767824			10.6784
									10.6825	0.085985			10.6875	0.273175			10.6822	0.9889					10.6887	0.392509			10.684	0.690897			10.6879	0.996225					10.6889	0.975303			10.6822	0.9889			10.687	0.775411			10.6863
									10.6904	0.0897505			10.6954	0.285258			10.69	0.990899					10.6966	0.404971			10.6919	0.704684			10.6958	0.995365					10.6968	0.972099			10.69	0.990899			10.6949	0.782213			10.6942
									10.6983	0.093746			10.7033	0.297307			10.6979	0.992806					10.7044	0.417763			10.6998	0.71811			10.7037	0.994153					10.7047	0.968669			10.6979	0.992806			10.7028	0.789323			10.7021
									10.7062	0.0981286			10.7112	0.310329			10.7058	0.994447					10.7123	0.430213			10.7077	0.730702			10.7116	0.993067					10.7126	0.965136			10.7058	0.994447			10.7107	0.796812			10.71
									10.7141	0.102315			10.7191	0.323474			10.7137	0.995774					10.7202	0.442727			10.7156	0.74387			10.7195	0.991707					10.7205	0.961517			10.7137	0.995774			10.7186	0.80358			10.7179
									10.722	0.106965			10.727	0.337095			10.7216	0.996831					10.7281	0.455607			10.7235	0.756847			10.7274	0.990126					10.7284	0.957589			10.7216	0.996831			10.7265	0.811541			10.7258
									10.7298	0.111939			10.7349	0.351038			10.7295	0.998076					10.736	0.46909			10.7314	0.769083			10.7353	0.988358					10.7363	0.953549			10.7295	0.998076			10.7344	0.818266			10.7337
									10.7377	0.117081			10.7428	0.365143			10.7374	0.999023					10.7439	0.482639			10.7393	0.781421			10.7432	0.986523					10.7442	0.949526			10.7374	0.999023			10.7423	0.825051			10.7416
									10.7456	0.122196			10.7507	0.379681			10.7453	0.999641					10.7518	0.496947			10.7472	0.793448			10.7511	0.984999					10.7521	0.944961			10.7453	0.999641			10.7502	0.832149			10.7495
									10.7535	0.127585			10.7586	0.394766			10.7532	0.999929					10.7597	0.511362			10.7551	0.805192			10.759	0.983327					10.76	0.939883			10.7532	0.999929			10.7581	0.838814			10.7574
									10.7614	0.133642			10.7665	0.410063			10.7611	1					10.7676	0.525506			10.763	0.816289			10.7669	0.981314					10.7679	0.934744			10.7611	1			10.766	0.845432			10.7653
									10.7693	0.139724			10.7744	0.425142			10.769	0.999993					10.7755	0.539743			10.7709	0.827232			10.7747	0.979047					10.7758	0.929802			10.769	0.999993			10.7739	0.852491			10.7732
									10.7772	0.145921			10.7823	0.440552			10.7769	0.999986					10.7834	0.553913			10.7788	0.838197			10.7826	0.977182					10.7837	0.924962			10.7769	0.999986			10.7818	0.859675			10.7811
									10.7851	0.152393			10.7902	0.456673			10.7848	0.999811					10.7913	0.568338			10.7867	0.849321			10.7905	0.975108					10.7916	0.9201			10.7848	0.999811			10.7896	0.866324			10.7889
									10.793	0.159421			10.7981	0.473187			10.7927	0.999268					10.7992	0.583247			10.7946	0.859787			10.7984	0.972574					10.7995	0.914847			10.7927	0.999268			10.7975	0.872813			10.7968
									10.8009	0.166436			10.8059	0.489457			10.8006	0.998776					10.8071	0.598286			10.8024	0.869853			10.8063	0.970099					10.8074	0.909434			10.8006	0.998776			10.8054	0.879201			10.8047
									10.8088	0.173731			10.8138	0.506138			10.8085	0.997977					10.815	0.613276			10.8103	0.879677			10.8142	0.968048					10.8153	0.90421			10.8085	0.997977			10.8133	0.884771			10.8126
									10.8167	0.181256			10.8217	0.522419			10.8164	0.99676					10.8229	0.627465			10.8182	0.888682			10.8221	0.965041					10.8232	0.898763			10.8164	0.99676			10.8212	0.890271			10.8205
									10.8246	0.18921			10.8296	0.538944			10.8243	0.995807					10.8308	0.641815			10.8261	0.897697			10.83	0.961804					10.831	0.893111			10.8243	0.995807			10.8291	0.896917			10.8284
									10.8325	0.197596			10.8375	0.555265			10.8322	0.994661					10.8387	0.656529			10.834	0.906586			10.8379	0.959263					10.8389	0.887666			10.8322	0.994661			10.837	0.902588			10.8363
									10.8404	0.205947			10.8454	0.572098			10.8401	0.993387					10.8466	0.670889			10.8419	0.91495			10.8458	0.956126					10.8468	0.882032			10.8401	0.993387			10.8449	0.908336			10.8442
									10.8483	0.214624			10.8533	0.588872			10.8479	0.991449					10.8545	0.68582			10.8498	0.923068			10.8537	0.953043					10.8547	0.876259			10.8479	0.991449			10.8528	0.914513			10.8521
									10.8562	0.224015			10.8612	0.605239			10.8558	0.989397					10.8623	0.700314			10.8577	0.930906			10.8616	0.949885					10.8626	0.870521			10.8558	0.989397			10.8607	0.920238			10.86
									10.8641	0.233333			10.8691	0.622154			10.8637	0.987282					10.8702	0.714804			10.8656	0.938251			10.8695	0.946822					10.8705	0.864556			10.8637	0.987282			10.8686	0.925315			10.8679
									10.872	0.243027			10.877	0.638509			10.8716	0.985194					10.8781	0.729357			10.8735	0.944953			10.8774	0.943703					10.8784	0.858622			10.8716	0.985194			10.8765	0.929762			10.8758
									10.8799	0.252786			10.8849	0.655254			10.8795	0.982841					10.886	0.743562			10.8814	0.951513			10.8853	0.940315					10.8863	0.852502			10.8795	0.982841			10.8844	0.934697			10.8837
									10.8877	0.263013			10.8928	0.671581			10.8874	0.98051					10.8939	0.758005			10.8893	0.95755			10.8932	0.936971					10.8942	0.846361			10.8874	0.98051			10.8923	0.94009			10.8916
									10.8956	0.27352			10.9007	0.687213			10.8953	0.978165					10.9018	0.771776			10.8972	0.963176			10.9011	0.933502					10.9021	0.840258			10.8953	0.978165			10.9002	0.945288			10.8995
									10.9035	0.284384			10.9086	0.703492			10.9032	0.975667					10.9097	0.785407			10.9051	0.96854			10.909	0.930217					10.91	0.833896			10.9032	0.975667			10.9081	0.950354			10.9074
									10.9114	0.295477			10.9165	0.719758			10.9111	0.972693					10.9176	0.798883			10.913	0.973475			10.9169	0.926263					10.9179	0.827642			10.9111	0.972693			10.916	0.954928			10.9153
									10.9193	0.307087			10.9244	0.735458			10.919	0.969438					10.9255	0.811795			10.9209	0.97771			10.9248	0.922666					10.9258	0.821407			10.919	0.969438			10.9239	0.958646			10.9232
									10.9272	0.318575			10.9323	0.750508			10.9269	0.965935					10.9334	0.824683			10.9288	0.981845			10.9327	0.919149					10.9337	0.815116			10.9269	0.965935			10.9318	0.961721			10.9311
									10.9351	0.330287			10.9402	0.765587			10.9348	0.962362					10.9413	0.837526			10.9367	0.985588			10.9405	0.915266					10.9416	0.808769			10.9348	0.962362			10.9397	0.965868			10.939
									10.943	0.342792			10.9481	0.780564			10.9427	0.958895					10.9492	0.849773			10.9446	0.989123			10.9484	0.911208					10.9495	0.802299			10.9427	0.958895			10.9476	0.969967			10.9468
									10.9509	0.355634			10.956	0.794552			10.9506	0.955528					10.9571	0.861687			10.9525	0.992124			10.9563	0.907359					10.9574	0.795991			10.9506	0.955528			10.9554	0.973652			10.9547
									10.9588	0.368013			10.9638	0.808353			10.9585	0.951908					10.965	0.872844			10.9603	0.99471			10.9642	0.903196					10.9653	0.789658			10.9585	0.951908			10.9633	0.976871			10.9626
									10.9667	0.380618			10.9717	0.822071			10.9664	0.947912					10.9729	0.883978			10.9682	0.996539			10.9721	0.898742					10.9732	0.783187			10.9664	0.947912			10.9712	0.980751			10.9705
									10.9746	0.394045			10.9796	0.83557			10.9743	0.943323					10.9808	0.894899			10.9761	0.997335			10.98	0.894731					10.9811	0.776589			10.9743	0.943323			10.9791	0.983718			10.9784
									10.9825	0.407538			10.9875	0.848548			10.9822	0.939535					10.9887	0.905145			10.984	0.998536			10.9879	0.890698					10.9889	0.770118			10.9822	0.939535			10.987	0.98561			10.9863
									10.9904	0.421315			10.9954	0.861034			10.9901	0.935499					10.9966	0.914376			10.9919	0.999904			10.9958	0.885891					10.9968	0.76363			10.9901	0.935499			10.9949	0.988649			10.9942
									10.9983	0.434866			11.0033	0.872769			10.998	0.930931					11.0045	0.923229			10.9998	1			11.0037	0.881282					11.0047	0.757109			10.998	0.930931			11.0028	0.991282			11.0021
									11.0062	0.448835			11.0112	0.884001			11.0058	0.925832					11.0124	0.932027			11.0077	0.999933			11.0116	0.877143					11.0126	0.75051			11.0058	0.925832			11.0107	0.993261			11.01
									11.0141	0.46337			11.0191	0.895102			11.0137	0.921224					11.0203	0.93986			11.0156	0.999866			11.0195	0.872392					11.0205	0.743917			11.0137	0.921224			11.0186	0.994725			11.0179
									11.022	0.47781			11.027	0.906257			11.0216	0.91673					11.0281	0.947227			11.0235	0.998908			11.0274	0.867623					11.0284	0.73732			11.0216	0.91673			11.0265	0.996485			11.0258
									11.0299	0.492164			11.0349	0.916062			11.0295	0.911667					11.036	0.955059			11.0314	0.997277			11.0353	0.863056					11.0363	0.730692			11.0295	0.911667			11.0344	0.99736			11.0337
									11.0378	0.506857			11.0428	0.924928			11.0374	0.906306					11.0439	0.962129			11.0393	0.995703			11.0432	0.858432					11.0442	0.724235			11.0374	0.906306			11.0423	0.998522			11.0416
									11.0457	0.521461			11.0507	0.933805			11.0453	0.901139					11.0518	0.968223			11.0472	0.99382			11.0511	0.853148					11.0521	0.717606			11.0453	0.901139			11.0502	0.998863			11.0495
									11.0535	0.536278			11.0586	0.942098			11.0532	0.895885					11.0597	0.973851			11.0551	0.991139			11.059	0.847935					11.06	0.710927			11.0532	0.895885			11.0581	0.999204			11.0574
									11.0614	0.551152			11.0665	0.949933			11.0611	0.890568					11.0676	0.978695			11.063	0.988165			11.0669	0.842919					11.0679	0.704205			11.0611	0.890568			11.066	0.999507			11.0653
									11.0693	0.566225			11.0744	0.956925			11.069	0.885366					11.0755	0.983008			11.0709	0.984895			11.0748	0.838036					11.0758	0.697853			11.069	0.885366			11.0739	1			11.0732
									11.0772	0.58116			11.0823	0.9641			11.0769	0.880104					11.0834	0.98723			11.0788	0.980996			11.0827	0.832721					11.0837	0.691193			11.0769	0.880104			11.0818	0.999958			11.0811
									11.0851	0.596126			11.0902	0.970698			11.0848	0.874478					11.0913	0.990861			11.0867	0.977535			11.0906	0.827863					11.0916	0.684466			11.0848	0.874478			11.0897	0.999916			11.089
									11.093	0.611441			11.0981	0.97601			11.0927	0.868708					11.0992	0.993674			11.0946	0.973334			11.0984	0.822303					11.0995	0.678025			11.0927	0.868708			11.0976	0.999813			11.0969
									11.1009	0.626449			11.106	0.980991			11.1006	0.862923					11.1071	0.99578			11.1025	0.968876			11.1063	0.816534					11.1074	0.671326			11.1006	0.862923			11.1055	0.999711			11.1048
									11.1088	0.641333			11.1139	0.985417			11.1085	0.856825					11.115	0.997717			11.1104	0.963972			11.1142	0.811251					11.1153	0.664883			11.1085	0.856825			11.1133	0.999312			11.1126
									11.1167	0.655862			11.1218	0.989132			11.1164	0.850494					11.1229	0.999203			11.1182	0.958227			11.1221	0.806189					11.1232	0.6584			11.1164	0.850494			11.1212	0.998546			11.1205
									11.1246	0.669945			11.1296	0.992412			11.1243	0.844923					11.1308	1			11.1261	0.952476			11.13	0.80029					11.1311	0.651771			11.1243	0.844923			11.1291	0.997039			11.1284
									11.1325	0.684367			11.1375	0.995128			11.1322	0.838568					11.1387	0.999916			11.134	0.946639			11.1379	0.793766					11.139	0.645101			11.1322	0.838568			11.137	0.994527			11.1363
									11.1404	0.698941			11.1454	0.997106			11.1401	0.831845					11.1466	0.999831			11.1419	0.940236			11.1458	0.788219					11.1469	0.638389			11.1401	0.831845			11.1449	0.99238			11.1442
									11.1483	0.71306			11.1533	0.99863			11.148	0.825598					11.1545	0.999552			11.1498	0.933515			11.1537	0.782266					11.1547	0.631788			11.148	0.825598			11.1528	0.990969			11.1521
									11.1562	0.727583			11.1612	1			11.1559	0.818964					11.1624	0.998186			11.1577	0.926397			11.1616	0.776423					11.1626	0.625549			11.1559	0.818964			11.1607	0.98843			11.16
									11.1641	0.741928			11.1691	0.999883			11.1638	0.812081					11.1703	0.996434			11.1656	0.919545			11.1695	0.769964					11.1705	0.619068			11.1638	0.812081			11.1686	0.98533			11.1679
									11.172	0.755975			11.177	0.999767			11.1716	0.805111					11.1782	0.994793			11.1735	0.912165			11.1774	0.763427					11.1784	0.612722			11.1716	0.805111			11.1765	0.982376			11.1758
									11.1799	0.769569			11.1849	0.999463			11.1795	0.798601					11.1861	0.992276			11.1814	0.90421			11.1853	0.757232					11.1863	0.606214			11.1795	0.798601			11.1844	0.978753			11.1837
									11.1878	0.783144			11.1928	0.998855			11.1874	0.791976					11.1939	0.989339			11.1893	0.896772			11.1932	0.750596					11.1942	0.599766			11.1874	0.791976			11.1923	0.975303			11.1916
									11.1957	0.796566			11.2007	0.997214			11.1953	0.784931					11.2018	0.986002			11.1972	0.889397			11.2011	0.743964					11.2021	0.593311			11.1953	0.784931			11.2002	0.971918			11.1995
									11.2036	0.809388			11.2086	0.99535			11.2032	0.778225					11.2097	0.982212			11.2051	0.880774			11.209	0.73775					11.21	0.587008			11.2032	0.778225			11.2081	0.967949			11.2074
									11.2114	0.822227			11.2165	0.993274			11.2111	0.771047					11.2176	0.977651			11.213	0.872299			11.2169	0.731487					11.2179	0.580737			11.2111	0.771047			11.216	0.964347			11.2153
									11.2193	0.83485			11.2244	0.98977			11.219	0.763991					11.2255	0.972919			11.2209	0.863265			11.2248	0.724828					11.2258	0.574175			11.219	0.763991			11.2239	0.959879			11.2232
									11.2272	0.847152			11.2323	0.986223			11.2269	0.756783					11.2334	0.967558			11.2288	0.854019			11.2327	0.718215					11.2337	0.567852			11.2269	0.756783			11.2318	0.95458			11.2311
									11.2351	0.859138			11.2402	0.982592			11.2348	0.749606					11.2413	0.962122			11.2367	0.844983			11.2406	0.711705					11.2416	0.561561			11.2348	0.749606			11.2397	0.949872			11.239
									11.243	0.870309			11.2481	0.978372			11.2427	0.742559					11.2492	0.956632			11.2446	0.835907			11.2485	0.705202					11.2495	0.555236			11.2427	0.742559			11.2476	0.945521			11.2469
									11.2509	0.881352			11.256	0.973801			11.2506	0.735263					11.2571	0.950641			11.2525	0.826807			11.2564	0.698224					11.2574	0.548873			11.2506	0.735263			11.2555	0.940356			11.2548
									11.2588	0.891727			11.2639	0.968629			11.2585	0.728022					11.265	0.94394			11.2604	0.816953			11.2642	0.691304					11.2653	0.542414			11.2585	0.728022			11.2634	0.934447			11.2627
									11.2667	0.901686			11.2718	0.962843			11.2664	0.720715					11.2729	0.936626			11.2683	0.80712			11.2721	0.68487					11.2732	0.536114			11.2664	0.720715			11.2712	0.928087			11.2705
									11.2746	0.911397			11.2797	0.956536			11.2743	0.713382					11.2808	0.929516			11.2762	0.797519			11.28	0.677995					11.2811	0.529955			11.2743	0.713382			11.2791	0.922808			11.2784
									11.2825	0.920614			11.2875	0.949623			11.2822	0.706062					11.2887	0.92207			11.284	0.787201			11.2879	0.671755					11.289	0.523698			11.2822	0.706062			11.287	0.917397			11.2863
									11.2904	0.929647			11.2954	0.942956			11.2901	0.698786					11.2966	0.914064			11.2919	0.776779			11.2958	0.66498					11.2969	0.517642			11.2901	0.698786			11.2949	0.910803			11.2942
									11.2983	0.938048			11.3033	0.935705			11.298	0.691806					11.3045	0.905799			11.2998	0.766868			11.3037	0.657818					11.3048	0.511527			11.298	0.691806			11.3028	0.903776			11.3021
									11.3062	0.945799			11.3112	0.927948			11.3059	0.684061					11.3124	0.897536			11.3077	0.756741			11.3116	0.650555					11.3126	0.505356			11.3059	0.684061			11.3107	0.896678			11.31
									11.3141	0.953255			11.3191	0.920141			11.3138	0.676063					11.3203	0.888985			11.3156	0.746296			11.3195	0.643497					11.3205	0.499208			11.3138	0.676063			11.3186	0.890568			11.3179
									11.322	0.960213			11.327	0.91197			11.3217	0.66852					11.3282	0.879763			11.3235	0.735565			11.3274	0.635902					11.3284	0.493056			11.3217	0.66852			11.3265	0.882786			11.3258
									11.3299	0.966542			11.3349	0.90367			11.3295	0.660832					11.3361	0.870601			11.3314	0.725615			11.3353	0.627794					11.3363	0.486763			11.3295	0.660832			11.3344	0.876238			11.3337
									11.3378	0.972253			11.3428	0.895191			11.3374	0.652958					11.344	0.86182			11.3393	0.715211			11.3432	0.620435					11.3442	0.480548			11.3374	0.652958			11.3423	0.868901			11.3416
									11.3457	0.977688			11.3507	0.885918			11.3453	0.645297					11.3518	0.852037			11.3472	0.703933			11.3511	0.613355					11.3521	0.474681			11.3453	0.645297			11.3502	0.860762			11.3495
									11.3536	0.98252			11.3586	0.876762			11.3532	0.637914					11.3597	0.841954			11.3551	0.693039			11.359	0.605352					11.36	0.468601			11.3532	0.637914			11.3581	0.853326			11.3574
									11.3615	0.986528			11.3665	0.867218			11.3611	0.629988					11.3676	0.832155			11.363	0.682367			11.3669	0.597573					11.3679	0.462162			11.3611	0.629988			11.366	0.845671			11.3653
									11.3693	0.990079			11.3744	0.857469			11.369	0.621948					11.3755	0.822557			11.3709	0.671914			11.3748	0.590126					11.3758	0.456084			11.369	0.621948			11.3739	0.837107			11.3732
									11.3772	0.993149			11.3823	0.847256			11.3769	0.613905					11.3834	0.81223			11.3788	0.661405			11.3827	0.582422					11.3837	0.45014			11.3769	0.613905			11.3818	0.827884			11.3811
									11.3851	0.995749			11.3902	0.837178			11.3848	0.60568					11.3913	0.801684			11.3867	0.651695			11.3906	0.574921					11.3916	0.444117			11.3848	0.60568			11.3897	0.819873			11.389
									11.393	0.99775			11.3981	0.826756			11.3927	0.597931					11.3992	0.791298			11.3946	0.641928			11.3985	0.567359					11.3995	0.437976			11.3927	0.597931			11.3976	0.81182			11.3969
									11.4009	0.999399			11.406	0.816437			11.4006	0.590683					11.4071	0.78124			11.4025	0.631318			11.4064	0.559716					11.4074	0.432188			11.4006	0.590683			11.4055	0.803293			11.4048
									11.4088	0.999835			11.4139	0.806081			11.4085	0.582624					11.415	0.770788			11.4104	0.620649			11.4143	0.551955					11.4153	0.426725			11.4085	0.582624			11.4134	0.794468			11.4127
									11.4167	1			11.4218	0.795408			11.4164	0.575037					11.4229	0.759974			11.4183	0.609797			11.4221	0.544426					11.4232	0.420912			11.4164	0.575037			11.4213	0.786081			11.4206
									11.4246	0.999815			11.4297	0.784346			11.4243	0.567331					11.4308	0.749443			11.4262	0.599118			11.43	0.536877					11.4311	0.41494			11.4243	0.567331			11.4292	0.777709			11.4284
									11.4325	0.999629			11.4376	0.773542			11.4322	0.559455					11.4387	0.738855			11.4341	0.588824			11.4379	0.529129					11.439	0.409141			11.4322	0.559455			11.437	0.768634			11.4363
									11.4404	0.998227			11.4454	0.762504			11.4401	0.55138					11.4466	0.728233			11.4419	0.57781			11.4458	0.521912					11.4469	0.403187			11.4401	0.55138			11.4449	0.760146			11.4442
									11.4483	0.996187			11.4533	0.750972			11.448	0.543246					11.4545	0.716852			11.4498	0.567154			11.4537	0.514456					11.4548	0.397156			11.448	0.543246			11.4528	0.750989			11.4521
									11.4562	0.994009			11.4612	0.739648			11.4559	0.53551					11.4624	0.706148			11.4577	0.556517			11.4616	0.507107					11.4627	0.391281			11.4559	0.53551			11.4607	0.742019			11.46
									11.4641	0.990826			11.4691	0.728069			11.4638	0.527527					11.4703	0.695673			11.4656	0.545904			11.4695	0.499039					11.4706	0.385276			11.4638	0.527527			11.4686	0.732917			11.4679
									11.472	0.987473			11.477	0.716485			11.4717	0.519653					11.4782	0.68488			11.4735	0.535244			11.4774	0.490985					11.4784	0.379396			11.4717	0.519653			11.4765	0.722932			11.4758
									11.4799	0.98349			11.4849	0.705105			11.4796	0.512138					11.4861	0.673942			11.4814	0.525185			11.4853	0.484062					11.4863	0.373541			11.4796	0.512138			11.4844	0.713944			11.4837
									11.4878	0.979003			11.4928	0.693774			11.4875	0.504476					11.494	0.663103			11.4893	0.515596			11.4932	0.476112					11.4942	0.367786			11.4875	0.504476			11.4923	0.705172			11.4916
									11.4957	0.974208			11.5007	0.682537			11.4953	0.49696					11.5019	0.651878			11.4972	0.505798			11.5011	0.468028					11.5021	0.361991			11.4953	0.49696			11.5002	0.695882			11.4995
									11.5036	0.968963			11.5086	0.670789			11.5032	0.489281					11.5098	0.641353			11.5051	0.495544			11.509	0.460542					11.51	0.356276			11.5032	0.489281			11.5081	0.685826			11.5074
									11.5115	0.963128			11.5165	0.659023			11.5111	0.48157					11.5176	0.631008			11.513	0.485377			11.5169	0.452988					11.5179	0.350615			11.5111	0.48157			11.516	0.676021			11.5153
									11.5194	0.956709			11.5244	0.647299			11.519	0.474636					11.5255	0.620946			11.5209	0.475308			11.5248	0.445385					11.5258	0.344927			11.519	0.474636			11.5239	0.66649			11.5232
									11.5273	0.949968			11.5323	0.635714			11.5269	0.467244					11.5334	0.611091			11.5288	0.465459			11.5327	0.437998					11.5337	0.339261			11.5269	0.467244			11.5318	0.657069			11.5311
									11.5351	0.942609			11.5402	0.624443			11.5348	0.459334					11.5413	0.601427			11.5367	0.456332			11.5406	0.430261					11.5416	0.333882			11.5348	0.459334			11.5397	0.647647			11.539
									11.543	0.935282			11.5481	0.612733			11.5427	0.451928					11.5492	0.590804			11.5446	0.447141			11.5485	0.422733					11.5495	0.328074			11.5427	0.451928			11.5476	0.637326			11.5469
									11.5509	0.927352			11.556	0.60168			11.5506	0.444461					11.5571	0.579916			11.5525	0.438393			11.5564	0.415139					11.5574	0.322526			11.5506	0.444461			11.5555	0.62769			11.5548
									11.5588	0.91892			11.5639	0.590001			11.5585	0.437054					11.565	0.570296			11.5604	0.429225			11.5643	0.408057					11.5653	0.317136			11.5585	0.437054			11.5634	0.618551			11.5627
									11.5667	0.910123			11.5718	0.578467			11.5664	0.429918					11.5729	0.560247			11.5683	0.41974			11.5722	0.400746					11.5732	0.311548			11.5664	0.429918			11.5713	0.608867			11.5706
									11.5746	0.900801			11.5797	0.567755			11.5743	0.422618					11.5808	0.549975			11.5762	0.410867			11.5801	0.393347					11.5811	0.306057			11.5743	0.422618			11.5792	0.599726			11.5785
									11.5825	0.891444			11.5876	0.556415			11.5822	0.415378					11.5887	0.540188			11.5841	0.402258			11.5879	0.386766					11.589	0.300508			11.5822	0.415378			11.5871	0.589901			11.5864
									11.5904	0.881368			11.5955	0.545576			11.5901	0.408247					11.5966	0.530593			11.592	0.393801			11.5958	0.379837					11.5969	0.29521			11.5901	0.408247			11.5949	0.580582			11.5942
									11.5983	0.871315			11.6034	0.535293			11.598	0.401394					11.6045	0.520846			11.5999	0.385842			11.6037	0.372767					11.6048	0.29017			11.598	0.401394			11.6028	0.572577			11.6021
									11.6062	0.861028			11.6112	0.524143			11.6059	0.394331					11.6124	0.511158			11.6077	0.377753			11.6116	0.365421					11.6127	0.284753			11.6059	0.394331			11.6107	0.563021			11.61
									11.6141	0.850655			11.6191	0.512937			11.6138	0.387765					11.6203	0.501831			11.6156	0.369419			11.6195	0.358466					11.6206	0.279379			11.6138	0.387765			11.6186	0.553263			11.6179
									11.622	0.839904			11.627	0.502395			11.6217	0.381052					11.6282	0.492789			11.6235	0.36111			11.6274	0.351868					11.6285	0.274093			11.6217	0.381052			11.6265	0.544295			11.6258
									11.6299	0.828663			11.6349	0.492144			11.6296	0.373945					11.6361	0.483598			11.6314	0.352843			11.6353	0.344822					11.6363	0.268995			11.6296	0.373945			11.6344	0.534478			11.6337
									11.6378	0.817515			11.6428	0.481977			11.6375	0.36724					11.644	0.474554			11.6393	0.344924			11.6432	0.337827					11.6442	0.263937			11.6375	0.36724			11.6423	0.525755			11.6416
									11.6457	0.806012			11.6507	0.471822			11.6454	0.360967					11.6519	0.465301			11.6472	0.337184			11.6511	0.331037					11.6521	0.258867			11.6454	0.360967			11.6502	0.517593			11.6495
									11.6536	0.794227			11.6586	0.461439			11.6532	0.354469					11.6598	0.456149			11.6551	0.329499			11.659	0.324497					11.66	0.253931			11.6532	0.354469			11.6581	0.508147			11.6574
									11.6615	0.782674			11.6665	0.451084			11.6611	0.347878					11.6677	0.44786			11.663	0.322154			11.6669	0.317929					11.6679	0.248763			11.6611	0.347878			11.666	0.499019			11.6653
									11.6694	0.77066			11.6744	0.441939			11.669	0.341242					11.6756	0.439258			11.6709	0.315069			11.6748	0.311322					11.6758	0.243911			11.669	0.341242			11.6739	0.490933			11.6732
									11.6773	0.758202			11.6823	0.432164			11.6769	0.335259					11.6834	0.43077			11.6788	0.30763			11.6827	0.305001					11.6837	0.239173			11.6769	0.335259			11.6818	0.482973			11.6811
									11.6852	0.745828			11.6902	0.421882			11.6848	0.329086					11.6913	0.422502			11.6867	0.300639			11.6906	0.298634					11.6916	0.234277			11.6848	0.329086			11.6897	0.474036			11.689
									11.693	0.733312			11.6981	0.412399			11.6927	0.322675					11.6992	0.414507			11.6946	0.293938			11.6985	0.292738					11.6995	0.229457			11.6927	0.322675			11.6976	0.464733			11.6969
									11.7009	0.720833			11.706	0.403104			11.7006	0.316751					11.7071	0.406615			11.7025	0.28719			11.7064	0.287437					11.7074	0.224676			11.7006	0.316751			11.7055	0.455927			11.7048
									11.7088	0.708024			11.7139	0.394221			11.7085	0.311					11.715	0.398621			11.7104	0.280926			11.7143	0.281543					11.7153	0.220108			11.7085	0.311			11.7134	0.448143			11.7127
									11.7167	0.69523			11.7218	0.385274			11.7164	0.305013					11.7229	0.390794			11.7183	0.274607			11.7222	0.275292					11.7232	0.215619			11.7164	0.305013			11.7213	0.439754			11.7206
									11.7246	0.682926			11.7297	0.376552			11.7243	0.299493					11.7308	0.383303			11.7262	0.268304			11.7301	0.269705					11.7311	0.211097			11.7243	0.299493			11.7292	0.432101			11.7285
									11.7325	0.670877			11.7376	0.368323			11.7322	0.293892					11.7387	0.376125			11.7341	0.262409			11.738	0.264289					11.739	0.206499			11.7322	0.293892			11.7371	0.424951			11.7364
									11.7404	0.658287			11.7455	0.359659			11.7401	0.288067					11.7466	0.369578			11.742	0.256769			11.7458	0.258521					11.7469	0.202301			11.7401	0.288067			11.745	0.416134			11.7443
									11.7483	0.64516			11.7534	0.351346			11.748	0.282136					11.7545	0.36277			11.7499	0.251003			11.7537	0.253027					11.7548	0.198043			11.748	0.282136			11.7529	0.408297			11.7521
									11.7562	0.632132			11.7613	0.343316			11.7559	0.276507					11.7624	0.355552			11.7578	0.245191			11.7616	0.247602					11.7627	0.193743			11.7559	0.276507			11.7607	0.40179			11.76
									11.7641	0.619207			11.7691	0.335058			11.7638	0.271918					11.7703	0.348932			11.7656	0.239607			11.7695	0.242524					11.7706	0.189539			11.7638	0.271918			11.7686	0.395353			11.7679
									11.772	0.605976			11.777	0.327342			11.7717	0.266821					11.7782	0.342668			11.7735	0.234761			11.7774	0.237624					11.7785	0.185509			11.7717	0.266821			11.7765	0.387753			11.7758
									11.7799	0.593681			11.7849	0.319723			11.7796	0.261558					11.7861	0.336948			11.7814	0.229836			11.7853	0.232446					11.7864	0.18137			11.7796	0.261558			11.7844	0.379616			11.7837
									11.7878	0.581382			11.7928	0.312274			11.7875	0.256609					11.794	0.33038			11.7893	0.224754			11.7932	0.227532					11.7943	0.177326			11.7875	0.256609			11.7923	0.372287			11.7916
									11.7957	0.568541			11.8007	0.305053			11.7954	0.251885					11.8019	0.324168			11.7972	0.219493			11.8011	0.222351					11.8021	0.17341			11.7954	0.251885			11.8002	0.365784			11.7995
									11.8036	0.556034			11.8086	0.297537			11.8033	0.247018					11.8098	0.318773			11.8051	0.21434			11.809	0.217198					11.81	0.169618			11.8033	0.247018			11.8081	0.359426			11.8074
									11.8115	0.543495			11.8165	0.290609			11.8112	0.242269					11.8177	0.312824			11.813	0.209603			11.8169	0.212903					11.8179	0.165716			11.8112	0.242269			11.816	0.352204			11.8153
									11.8194	0.531196			11.8244	0.283862			11.819	0.237785					11.8256	0.307074			11.8209	0.205481			11.8248	0.208444					11.8258	0.161942			11.819	0.237785			11.8239	0.345257			11.8232
									11.8273	0.518771			11.8323	0.277195			11.8269	0.233297					11.8335	0.301116			11.8288	0.201205			11.8327	0.203837					11.8337	0.158387			11.8269	0.233297			11.8318	0.338727			11.8311
									11.8352	0.50657			11.8402	0.270695			11.8348	0.228985					11.8413	0.295865			11.8367	0.197151			11.8406	0.200128					11.8416	0.154902			11.8348	0.228985			11.8397	0.333138			11.839
									11.8431	0.494354			11.8481	0.263917			11.8427	0.224325					11.8492	0.290891			11.8446	0.192617			11.8485	0.196153					11.8495	0.151411			11.8427	0.224325			11.8476	0.327866			11.8469
									11.851	0.481902			11.856	0.257632			11.8506	0.21996					11.8571	0.285964			11.8525	0.188096			11.8564	0.192132					11.8574	0.147937			11.8506	0.21996			11.8555	0.321285			11.8548
									11.8588	0.470351			11.8639	0.251408			11.8585	0.216122					11.865	0.281297			11.8604	0.184378			11.8643	0.187628					11.8653	0.144441			11.8585	0.216122			11.8634	0.315296			11.8627
									11.8667	0.45858			11.8718	0.245486			11.8664	0.212162					11.8729	0.27619			11.8683	0.181251			11.8722	0.183385					11.8732	0.141182			11.8664	0.212162			11.8713	0.309866			11.8706
									11.8746	0.446511			11.8797	0.239799			11.8743	0.208114					11.8808	0.271897			11.8762	0.177307			11.8801	0.179413					11.8811	0.138036			11.8743	0.208114			11.8792	0.30377			11.8785
									11.8825	0.434609			11.8876	0.233972			11.8822	0.204289					11.8887	0.267429			11.8841	0.173646			11.888	0.175956					11.889	0.13474			11.8822	0.204289			11.8871	0.297049			11.8864
									11.8904	0.423582			11.8955	0.228497			11.8901	0.200195					11.8966	0.262598			11.892	0.170177			11.8959	0.172425					11.8969	0.13148			11.8901	0.200195			11.895	0.291188			11.8943
									11.8983	0.412549			11.9034	0.223376			11.898	0.196433					11.9045	0.258537			11.8999	0.166685			11.9038	0.16887					11.9048	0.128482			11.898	0.196433			11.9029	0.286128			11.9022
									11.9062	0.401461			11.9113	0.217801			11.9059	0.192965					11.9124	0.254526			11.9078	0.163793			11.9116	0.164831					11.9127	0.125575			11.9059	0.192965			11.9108	0.280885			11.9101
									11.9141	0.390539			11.9192	0.212537			11.9138	0.189473					11.9203	0.250141			11.9157	0.160271			11.9195	0.161393					11.9206	0.12266			11.9138	0.189473			11.9186	0.275434			11.9179
									11.922	0.38027			11.927	0.207787			11.9217	0.185668					11.9282	0.24605			11.9235	0.157039			11.9274	0.158006					11.9285	0.11977			11.9217	0.185668			11.9265	0.270444			11.9258
									11.9299	0.369713			11.9349	0.20293			11.9296	0.182578					11.9361	0.24268			11.9314	0.154259			11.9353	0.154982					11.9364	0.116816			11.9296	0.182578			11.9344	0.265846			11.9337
									11.9378	0.359104			11.9428	0.198229			11.9375	0.179965					11.944	0.239161			11.9393	0.15132			11.9432	0.152314					11.9443	0.114012			11.9375	0.179965			11.9423	0.260947			11.9416
									11.9457	0.349012			11.9507	0.193357			11.9454	0.176807					11.9519	0.235862			11.9472	0.149158			11.9511	0.149125					11.9522	0.111309			11.9454	0.176807			11.9502	0.256242			11.9495
									11.9536	0.339117			11.9586	0.189088			11.9533	0.173671					11.9598	0.232435			11.9551	0.146439			11.959	0.145937					11.96	0.108703			11.9533	0.173671			11.9581	0.251739			11.9574
									11.9615	0.329551			11.9665	0.185317			11.9612	0.17082					11.9677	0.22944			11.963	0.143168			11.9669	0.14315					11.9679	0.106161			11.9612	0.17082			11.966	0.246563			11.9653
									11.9694	0.320113			11.9744	0.181276			11.9691	0.167634					11.9756	0.226865			11.9709	0.140375			11.9748	0.140256					11.9758	0.103768			11.9691	0.167634			11.9739	0.242249			11.9732
									11.9773	0.311042			11.9823	0.176885			11.9769	0.164678					11.9835	0.223796			11.9788	0.138362			11.9827	0.137968					11.9837	0.101427			11.9769	0.164678			11.9818	0.239609			11.9811
									11.9852	0.302008			11.9902	0.173199			11.9848	0.161731					11.9914	0.220316			11.9867	0.136548			11.9906	0.135051					11.9916	0.098836			11.9848	0.161731			11.9897	0.236047			11.989
									11.9931	0.292931			11.9981	0.170202			11.9927	0.159076					11.9993	0.217078			11.9946	0.134107			11.9985	0.132501					11.9995	0.0964944			11.9927	0.159076			11.9976	0.231817			11.9969
									12.001	0.284366			12.006	0.166564			12.0006	0.156328					12.0071	0.214465			12.0025	0.131594			12.0064	0.130345					12.0074	0.0942753			12.0006	0.156328			12.0055	0.228274			12.0048
									12.0089	0.2758			12.0139	0.162694			12.0085	0.15397					12.015	0.211661			12.0104	0.129639			12.0143	0.128195					12.0153	0.0920652			12.0085	0.15397			12.0134	0.22487			12.0127
									12.0167	0.267405			12.0218	0.159049			12.0164	0.151684					12.0229	0.209403			12.0183	0.127874			12.0222	0.125741					12.0232	0.089948			12.0164	0.151684			12.0213	0.221854			12.0206
									12.0246	0.259396			12.0297	0.155975			12.0243	0.148812					12.0308	0.20703			12.0262	0.125813			12.0301	0.123396					12.0311	0.0879218			12.0243	0.148812			12.0292	0.218307			12.0285
									12.0325	0.251151			12.0376	0.152605			12.0322	0.146105					12.0387	0.204657			12.0341	0.124037			12.038	0.121215					12.039	0.0859632			12.0322	0.146105			12.0371	0.215381			12.0364
									12.0404	0.243597			12.0455	0.149258			12.0401	0.144396					12.0466	0.202644			12.042	0.122492			12.0459	0.118824					12.0469	0.0839621			12.0401	0.144396			12.045	0.212114			12.0443
									12.0483	0.236165			12.0534	0.146377			12.048	0.142285					12.0545	0.20032			12.0499	0.121072			12.0538	0.117051					12.0548	0.0819765			12.048	0.142285			12.0529	0.208292			12.0522
									12.0562	0.228391			12.0613	0.143111			12.0559	0.139732					12.0624	0.19819			12.0578	0.119885			12.0617	0.11519					12.0627	0.0801362			12.0559	0.139732			12.0608	0.20538			12.0601
									12.0641	0.221216			12.0692	0.140117			12.0638	0.137754					12.0703	0.196517			12.0657	0.118166			12.0695	0.11318					12.0706	0.0783129			12.0638	0.137754			12.0687	0.202347			12.068
									12.072	0.213919			12.0771	0.137722			12.0717	0.136005					12.0782	0.194476			12.0736	0.11656			12.0774	0.111811					12.0785	0.0764846			12.0717	0.136005			12.0766	0.199004			12.0758
									12.0799	0.207224			12.085	0.135068			12.0796	0.133983					12.0861	0.19225			12.0815	0.11519			12.0853	0.110333					12.0864	0.0748201			12.0796	0.133983			12.0844	0.195986			12.0837
									12.0878	0.20055			12.0928	0.132389			12.0875	0.132219					12.094	0.190514			12.0893	0.113565			12.0932	0.108333					12.0943	0.0731633			12.0875	0.132219			12.0923	0.192626			12.0916
									12.0957	0.193835			12.1007	0.129951			12.0954	0.130289					12.1019	0.189033			12.0972	0.112312			12.1011	0.106234					12.1022	0.0715948			12.0954	0.130289			12.1002	0.189297			12.0995
									12.1036	0.187477			12.1086	0.127394			12.1033	0.128283					12.1098	0.187502			12.1051	0.111427			12.109	0.104849					12.1101	0.0700748			12.1033	0.128283			12.1081	0.187059			12.1074
									12.1115	0.181476			12.1165	0.124877			12.1112	0.1263					12.1177	0.185646			12.113	0.110143			12.1169	0.103431					12.118	0.0685877			12.1112	0.1263			12.116	0.183914			12.1153
									12.1194	0.175578			12.1244	0.122593			12.1191	0.12472					12.1256	0.183869			12.1209	0.1089			12.1248	0.102071					12.1258	0.0671908			12.1191	0.12472			12.1239	0.181412			12.1232
									12.1273	0.170008			12.1323	0.120803			12.127	0.123823					12.1335	0.182683			12.1288	0.108181			12.1327	0.101049					12.1337	0.0656102			12.127	0.123823			12.1318	0.179351			12.1311
									12.1352	0.164446			12.1402	0.118594			12.1349	0.122286					12.1414	0.181237			12.1367	0.1073			12.1406	0.099672					12.1416	0.0640566			12.1349	0.122286			12.1397	0.177281			12.139
									12.1431	0.158907			12.1481	0.116234			12.1427	0.120462					12.1493	0.179773			12.1446	0.106326			12.1485	0.0986745					12.1495	0.0628134			12.1427	0.120462			12.1476	0.175498			12.1469
									12.151	0.153614			12.156	0.115003			12.1506	0.119095					12.1572	0.178728			12.1525	0.105674			12.1564	0.0973824					12.1574	0.061685			12.1506	0.119095			12.1555	0.173857			12.1548
									12.1589	0.148349			12.1639	0.113404			12.1585	0.117669					12.1651	0.17725			12.1604	0.105478			12.1643	0.0963082					12.1653	0.0603638			12.1585	0.117669			12.1634	0.170971			12.1627
									12.1668	0.14356			12.1718	0.111494			12.1664	0.116395					12.1729	0.175933			12.1683	0.10476			12.1722	0.0957659					12.1732	0.0591787			12.1664	0.116395			12.1713	0.167602			12.1706
									12.1747	0.139015			12.1797	0.110091			12.1743	0.115207					12.1808	0.175096			12.1762	0.103354			12.1801	0.0947383					12.1811	0.0580636			12.1743	0.115207			12.1792	0.166715			12.1785
									12.1825	0.134378			12.1876	0.108116			12.1822	0.113901					12.1887	0.173899			12.1841	0.102858			12.188	0.0938443					12.189	0.056803			12.1822	0.113901			12.1871	0.165963			12.1864
									12.1904	0.129707			12.1955	0.106399			12.1901	0.112746					12.1966	0.173218			12.192	0.102422			12.1959	0.0928531					12.1969	0.0556455			12.1901	0.112746			12.195	0.163809			12.1943
									12.1983	0.125211			12.2034	0.105596			12.198	0.11151					12.2045	0.172449			12.1999	0.102045			12.2038	0.0920953					12.2048	0.0546092			12.198	0.11151			12.2029	0.162051			12.2022
									12.2062	0.121			12.2113	0.104219			12.2059	0.110732					12.2124	0.171406			12.2078	0.101439			12.2117	0.0914518					12.2127	0.0535687			12.2059	0.110732			12.2108	0.15997			12.2101
									12.2141	0.116986			12.2192	0.102667			12.2138	0.109877					12.2203	0.17037			12.2157	0.100549			12.2196	0.0901369					12.2206	0.0525973			12.2138	0.109877			12.2187	0.157914			12.218
									12.222	0.112886			12.2271	0.101036			12.2217	0.108822					12.2282	0.169435			12.2236	0.100287			12.2274	0.0890928					12.2285	0.0516239			12.2217	0.108822			12.2266	0.156513			12.2259
									12.2299	0.109271			12.235	0.0995401			12.2296	0.107774					12.2361	0.168782			12.2315	0.100259			12.2353	0.0887004					12.2364	0.0507124			12.2296	0.107774			12.2345	0.155142			12.2337
									12.2378	0.105648			12.2429	0.0985776			12.2375	0.106643					12.244	0.167812			12.2394	0.100024			12.2432	0.0885275					12.2443	0.0497814			12.2375	0.106643			12.2423	0.153316			12.2416
									12.2457	0.102			12.2507	0.0974155			12.2454	0.105611					12.2519	0.166801			12.2472	0.0996089			12.2511	0.0878811					12.2522	0.0488118			12.2454	0.105611			12.2502	0.151828			12.2495
									12.2536	0.0986018			12.2586	0.0960261			12.2533	0.104671					12.2598	0.166625			12.2551	0.099246			12.259	0.0872819					12.2601	0.0479166			12.2533	0.104671			12.2581	0.151727			12.2574
									12.2615	0.0954132			12.2665	0.0949693			12.2612	0.103802					12.2677	0.166391			12.263	0.0992324			12.2669	0.0862656					12.268	0.0472071			12.2612	0.103802			12.266	0.150855			12.2653
									12.2694	0.091999			12.2744	0.0941246			12.2691	0.103066					12.2756	0.165723			12.2709	0.0992189			12.2748	0.0852682					12.2759	0.0465491			12.2691	0.103066			12.2739	0.148998			12.2732
									12.2773	0.0888209			12.2823	0.093068			12.277	0.102109					12.2835	0.165094			12.2788	0.0988001			12.2827	0.0847321					12.2837	0.045921			12.277	0.102109			12.2818	0.146887			12.2811
									12.2852	0.085937			12.2902	0.0924157			12.2849	0.100873					12.2914	0.164852			12.2867	0.0988459			12.2906	0.0843062					12.2916	0.0451063			12.2849	0.100873			12.2897	0.145794			12.289
									12.2931	0.0828612			12.2981	0.0914542			12.2928	0.100175					12.2993	0.164705			12.2946	0.0988916			12.2985	0.0841571					12.2995	0.0442696			12.2928	0.100175			12.2976	0.145569			12.2969
									12.301	0.0800227			12.306	0.0904272			12.3006	0.0994537					12.3072	0.164177			12.3025	0.0987366			12.3064	0.0838148					12.3074	0.0435579			12.3006	0.0994537			12.3055	0.145304			12.3048
									12.3089	0.0773433			12.3139	0.0895491			12.3085	0.0984189					12.3151	0.164123			12.3104	0.0985816			12.3143	0.0831665					12.3153	0.042865			12.3085	0.0984189			12.3134	0.145026			12.3127
									12.3168	0.0747484			12.3218	0.089229			12.3164	0.0974946					12.323	0.16407			12.3183	0.0983274			12.3222	0.0827697					12.3232	0.0422798			12.3164	0.0974946			12.3213	0.144563			12.3206
									12.3247	0.0722875			12.3297	0.0886006			12.3243	0.0970495					12.3308	0.163584			12.3262	0.0983774			12.3301	0.0827987					12.3311	0.0417697			12.3243	0.0970495			12.3292	0.143307			12.3285
									12.3326	0.0697471			12.3376	0.0874122			12.3322	0.0963525					12.3387	0.162944			12.3341	0.0984274			12.338	0.0819037					12.339	0.0411029			12.3322	0.0963525			12.3371	0.143114			12.3364
									12.3404	0.0675146			12.3455	0.0868136			12.3401	0.0953679					12.3466	0.162683			12.342	0.0984103			12.3459	0.0813583					12.3469	0.0405461			12.3401	0.0953679			12.345	0.143167			12.3443
									12.3483	0.06551			12.3534	0.0861749			12.348	0.0950315					12.3545	0.162564			12.3499	0.0985569			12.3538	0.0812478					12.3548	0.040126			12.348	0.0950315			12.3529	0.142765			12.3522
									12.3562	0.0632292			12.3613	0.0850065			12.3559	0.0945165					12.3624	0.162445			12.3578	0.0986501			12.3617	0.0802625					12.3627	0.0395109			12.3559	0.0945165			12.3608	0.142018			12.3601
									12.3641	0.0612248			12.3692	0.0844541			12.3638	0.0939763					12.3703	0.161993			12.3657	0.0990222			12.3696	0.0803387					12.3706	0.0389507			12.3638	0.0939763			12.3687	0.140765			12.368
									12.372	0.0594019			12.3771	0.0843295			12.3717	0.093286					12.3782	0.16195			12.3736	0.0992244			12.3775	0.0804149					12.3785	0.0385714			12.3717	0.093286			12.3766	0.13971			12.3759
									12.3799	0.0575257			12.385	0.0840329			12.3796	0.0928317					12.3861	0.161769			12.3815	0.0994266			12.3854	0.080484					12.3864	0.0380976			12.3796	0.0928317			12.3845	0.138874			12.3838
									12.3878	0.0556672			12.3929	0.0834089			12.3875	0.092322					12.394	0.161778			12.3894	0.0997385			12.3932	0.0803538					12.3943	0.03771			12.3875	0.092322			12.3924	0.13822			12.3917
									12.3957	0.0540447			12.4008	0.0825659			12.3954	0.0914757					12.4019	0.161862			12.3973	0.099939			12.4011	0.0798822					12.4022	0.0372287			12.3954	0.0914757			12.4003	0.137402			12.3995
									12.4036	0.052304			12.4086	0.0820133			12.4033	0.0910785					12.4098	0.161991			12.4051	0.099994			12.409	0.0797156					12.4101	0.036824			12.4033	0.0910785			12.4081	0.13743			12.4074
									12.4115	0.0506257			12.4165	0.0817305			12.4112	0.0906266					12.4177	0.162044			12.413	0.100049			12.4169	0.079399					12.418	0.0365051			12.4112	0.0906266			12.416	0.137458			12.4153
									12.4194	0.0490214			12.4244	0.081741			12.4191	0.0896643					12.4256	0.162037			12.4209	0.100146			12.4248	0.0793199					12.4259	0.0360936			12.4191	0.0896643			12.4239	0.137385			12.4232
									12.4273	0.0473137			12.4323	0.08121			12.427	0.0891221					12.4335	0.16203			12.4288	0.100476			12.4327	0.0793987					12.4338	0.0357651			12.427	0.0891221			12.4318	0.137681			12.4311
									12.4352	0.0456285			12.4402	0.0805221			12.4349	0.0889121					12.4414	0.162772			12.4367	0.100807			12.4406	0.0794774					12.4417	0.0354286			12.4349	0.0889121			12.4397	0.137791			12.439
									12.4431	0.0442257			12.4481	0.0802781			12.4428	0.0887021					12.4493	0.162886			12.4446	0.100992			12.4485	0.0789148					12.4495	0.0351096			12.4428	0.0887021			12.4476	0.137753			12.4469
									12.451	0.0429963			12.456	0.0799639			12.4507	0.0881567					12.4572	0.162904			12.4525	0.101365			12.4564	0.0788389					12.4574	0.0348168			12.4507	0.0881567			12.4555	0.137715			12.4548
									12.4589	0.0416949			12.4639	0.0793876			12.4586	0.0879086					12.4651	0.162921			12.4604	0.101759			12.4643	0.0786708					12.4653	0.0343554			12.4586	0.0879086			12.4634	0.137529			12.4627
									12.4668	0.0404208			12.4718	0.0790674			12.4664	0.0871365					12.473	0.162704			12.4683	0.101989			12.4722	0.0786102					12.4732	0.0339383			12.4664	0.0871365			12.4713	0.13623			12.4706
									12.4747	0.0392218			12.4797	0.0789205			12.4743	0.0867528					12.4809	0.162869			12.4762	0.102218			12.4801	0.0785496					12.4811	0.0336476			12.4743	0.0867528			12.4792	0.137542			12.4785
									12.4826	0.0380751			12.4876	0.0789175			12.4822	0.0863727					12.4888	0.1631			12.4841	0.102861			12.488	0.0782674					12.489	0.033562			12.4822	0.0863727			12.4871	0.137736			12.4864
									12.4905	0.0368064			12.4955	0.0789178			12.4901	0.0859507					12.4966	0.163783			12.492	0.103412			12.4959	0.078053					12.4969	0.0334147			12.4901	0.0859507			12.495	0.137782			12.4943
									12.4984	0.0357506			12.5034	0.0789183			12.498	0.085397					12.5045	0.163989			12.4999	0.103606			12.5038	0.0784991					12.5048	0.0331805			12.498	0.085397			12.5029	0.137827			12.5022
									12.5062	0.0349209			12.5113	0.0789188			12.5059	0.0849959					12.5124	0.164093			12.5078	0.103736			12.5117	0.0785948					12.5127	0.0328321			12.5059	0.0849959			12.5108	0.136934			12.5101
									12.5141	0.0338788			12.5192	0.0788361			12.5138	0.084832					12.5203	0.164198			12.5157	0.103867			12.5196	0.078568					12.5206	0.0324995			12.5138	0.084832			12.5187	0.136911			12.518
									12.522	0.0328112			12.5271	0.0787728			12.5217	0.0842558					12.5282	0.164539			12.5236	0.10396			12.5275	0.0785412					12.5285	0.0322653			12.5217	0.0842558			12.5266	0.136889			12.5259
									12.5299	0.031838			12.535	0.0787094			12.5296	0.0838467					12.5361	0.16517			12.5315	0.104197			12.5354	0.0784034					12.5364	0.0320155			12.5296	0.0838467			12.5345	0.136819			12.5338
									12.5378	0.0309369			12.5429	0.0785438			12.5375	0.0836347					12.544	0.16524			12.5394	0.104727			12.5433	0.0781246					12.5443	0.0316754			12.5375	0.0836347			12.5424	0.137198			12.5417
									12.5457	0.0301797			12.5508	0.0784678			12.5454	0.0832316					12.5519	0.165643			12.5473	0.105612			12.5511	0.0781355					12.5522	0.0314568			12.5454	0.0832316			12.5503	0.137236			12.5496
									12.5536	0.0292164			12.5587	0.0784952			12.5533	0.0829894					12.5598	0.165855			12.5552	0.10621			12.559	0.0782263					12.5601	0.0313434			12.5533	0.0829894			12.5582	0.137275			12.5574
									12.5615	0.0282001			12.5666	0.0785226			12.5612	0.0828333					12.5677	0.165939			12.5631	0.106387			12.5669	0.0782974					12.568	0.0311546			12.5612	0.0828333			12.566	0.137398			12.5653
									12.5694	0.0273408			12.5744	0.0782233			12.5691	0.0827224					12.5756	0.166567			12.5709	0.106947			12.5748	0.0783685					12.5759	0.0309			12.5691	0.0827224			12.5739	0.137478			12.5732
									12.5773	0.0267315			12.5823	0.0782305			12.577	0.0824907					12.5835	0.166979			12.5788	0.107032			12.5827	0.0784249					12.5838	0.0307529			12.577	0.0824907			12.5818	0.137559			12.5811
									12.5852	0.0261596			12.5902	0.0782377			12.5849	0.0818223					12.5914	0.167327			12.5867	0.107273			12.5906	0.0784813					12.5917	0.0305647			12.5849	0.0818223			12.5897	0.138236			12.589
									12.5931	0.0252543			12.5981	0.0782673			12.5928	0.081509					12.5993	0.167784			12.5946	0.108262			12.5985	0.0784937					12.5996	0.0303627			12.5928	0.081509			12.5976	0.138464			12.5969
									12.601	0.0246135			12.606	0.0783926			12.6007	0.0814891					12.6072	0.168237			12.6025	0.108446			12.6064	0.0785061					12.6074	0.0302237			12.6007	0.0814891			12.6055	0.138692			12.6048
									12.6089	0.0240417			12.6139	0.0787622			12.6086	0.0814693					12.6151	0.168892			12.6104	0.10863			12.6143	0.0784492					12.6153	0.0300666			12.6086	0.0814693			12.6134	0.138893			12.6127
									12.6168	0.0232823			12.6218	0.0788915			12.6165	0.0812759					12.623	0.169325			12.6183	0.108863			12.6222	0.0783388					12.6232	0.0299091			12.6165	0.0812759			12.6213	0.139095			12.6206
									12.6247	0.0225982			12.6297	0.0790447			12.6243	0.0807789					12.6309	0.169877			12.6262	0.10911			12.6301	0.0783749					12.6311	0.0298099			12.6243	0.0807789			12.6292	0.139268			12.6285
									12.6326	0.0219355			12.6376	0.0791979			12.6322	0.080637					12.6388	0.170457			12.6341	0.109571			12.638	0.0784111					12.639	0.0297188			12.6322	0.080637			12.6371	0.139335			12.6364
									12.6405	0.021288			12.6455	0.0793384			12.6401	0.0801568					12.6467	0.171088			12.642	0.109744			12.6459	0.0781706					12.6469	0.0296488			12.6401	0.0801568			12.645	0.139403			12.6443
									12.6484	0.0207557			12.6534	0.079371			12.648	0.0799315					12.6546	0.171548			12.6499	0.110615			12.6538	0.0784762					12.6548	0.0296232			12.648	0.0799315			12.6529	0.140187			12.6522
									12.6563	0.0200741			12.6613	0.0794035			12.6559	0.0797568					12.6624	0.171902			12.6578	0.11136			12.6617	0.0787351					12.6627	0.0295688			12.6559	0.0797568			12.6608	0.140342			12.6601
									12.6641	0.0195825			12.6692	0.0794456			12.6638	0.0793643					12.6703	0.172336			12.6657	0.111601			12.6696	0.078893					12.6706	0.0294717			12.6638	0.0793643			12.6687	0.140439			12.668
									12.672	0.019258			12.6771	0.0794761			12.6717	0.0791261					12.6782	0.172756			12.6736	0.111937			12.6775	0.0789751					12.6785	0.0292948			12.6717	0.0791261			12.6766	0.140537			12.6759
									12.6799	0.0188104			12.685	0.0797704			12.6796	0.0791788					12.6861	0.173289			12.6815	0.112418			12.6854	0.0789686					12.6864	0.0292105			12.6796	0.0791788			12.6845	0.140828			12.6838
									12.6878	0.0186416			12.6929	0.0799204			12.6875	0.0791479					12.694	0.173424			12.6894	0.113001			12.6933	0.0789621					12.6943	0.0291255			12.6875	0.0791479			12.6924	0.141511			12.6917
									12.6957	0.0181839			12.7008	0.0800705			12.6954	0.079117					12.7019	0.173897			12.6973	0.114143			12.7012	0.0791742					12.7022	0.0290752			12.6954	0.079117			12.7003	0.141589			12.6996
									12.7036	0.0174992			12.7087	0.0801168			12.7033	0.0791474					12.7098	0.174466			12.7052	0.114683			12.7091	0.0795568					12.7101	0.0289301			12.7033	0.0791474			12.7082	0.141801			12.7075
									12.7115	0.01698			12.7166	0.0806199			12.7112	0.0791129					12.7177	0.175182			12.7131	0.11484			12.7169	0.0797462					12.718	0.0288431			12.7112	0.0791129			12.7161	0.141825			12.7153
									12.7194	0.0165812			12.7245	0.081157			12.7191	0.0790785					12.7256	0.175729			12.721	0.115349			12.7248	0.0799356					12.7259	0.0287849			12.7191	0.0790785			12.724	0.141849			12.7232
									12.7273	0.0163481			12.7323	0.0816386			12.727	0.078585					12.7335	0.17616			12.7288	0.115567			12.7327	0.0800653					12.7338	0.0287335			12.727	0.078585			12.7318	0.141485			12.7311
									12.7352	0.0161429			12.7402	0.081914			12.7349	0.078003					12.7414	0.176689			12.7367	0.115798			12.7406	0.080159					12.7417	0.0285949			12.7349	0.078003			12.7397	0.142321			12.739
									12.7431	0.0159463			12.7481	0.082035			12.7428	0.0778701					12.7493	0.176757			12.7446	0.116466			12.7485	0.080143					12.7496	0.0283913			12.7428	0.0778701			12.7476	0.142286			12.7469
									12.751	0.0157379			12.756	0.082156			12.7507	0.0777373					12.7572	0.177547			12.7525	0.117043			12.7564	0.0801269					12.7575	0.0283544			12.7507	0.0777373			12.7555	0.142252			12.7548
									12.7589	0.0153446			12.7639	0.082746			12.7586	0.0774334					12.7651	0.178209			12.7604	0.117276			12.7643	0.0799527					12.7654	0.0282377			12.7586	0.0774334			12.7634	0.14203			12.7627
									12.7668	0.0150642			12.7718	0.0838723			12.7665	0.0776811					12.773	0.178473			12.7683	0.117844			12.7722	0.0801126					12.7732	0.0281347			12.7665	0.0776811			12.7713	0.142659			12.7706
									12.7747	0.0147603			12.7797	0.0845509			12.7744	0.0776975					12.7809	0.179385			12.7762	0.118692			12.7801	0.0808857					12.7811	0.0280877			12.7744	0.0776975			12.7792	0.143522			12.7785
									12.7826	0.0145722			12.7876	0.0846852			12.7823	0.0776753					12.7888	0.180047			12.7841	0.119117			12.788	0.0810269					12.789	0.0279916			12.7823	0.0776753			12.7871	0.144212			12.7864
									12.7905	0.0144825			12.7955	0.0848591			12.7901	0.0776532					12.7967	0.180383			12.792	0.119689			12.7959	0.0811089					12.7969	0.0280357			12.7901	0.0776532			12.795	0.145108			12.7943
									12.7984	0.014195			12.8034	0.085297			12.798	0.077562					12.8046	0.181149			12.7999	0.120289			12.8038	0.0811735					12.8048	0.0280799			12.798	0.077562			12.8029	0.145241			12.8022
									12.8063	0.0138982			12.8113	0.0856641			12.8059	0.0771306					12.8125	0.181778			12.8078	0.121002			12.8117	0.0812381					12.8127	0.0280765			12.8059	0.0771306			12.8108	0.145334			12.8101
									12.8142	0.0135033			12.8192	0.0861651			12.8138	0.0771191					12.8203	0.182078			12.8157	0.121976			12.8196	0.0816137					12.8206	0.0280731			12.8138	0.0771191			12.8187	0.145428			12.818
									12.8221	0.0132341			12.8271	0.0867273			12.8217	0.0771007					12.8282	0.18247			12.8236	0.122632			12.8275	0.081721					12.8285	0.0280506			12.8217	0.0771007			12.8266	0.145625			12.8259
									12.8299	0.0129565			12.835	0.087078			12.8296	0.0770265					12.8361	0.183591			12.8315	0.123493			12.8354	0.082228					12.8364	0.0279387			12.8296	0.0770265			12.8345	0.145618			12.8338
									12.8378	0.0126169			12.8429	0.0875296			12.8375	0.0766995					12.844	0.184496			12.8394	0.123866			12.8433	0.0828776					12.8443	0.0279029			12.8375	0.0766995			12.8424	0.145611			12.8417
									12.8457	0.0124732			12.8508	0.088316			12.8454	0.0763916					12.8519	0.185162			12.8473	0.124238			12.8512	0.0829635					12.8522	0.0279708			12.8454	0.0763916			12.8503	0.146543			12.8496
									12.8536	0.0122977			12.8587	0.088758			12.8533	0.0763932					12.8598	0.185713			12.8552	0.124746			12.8591	0.0833541					12.8601	0.0279972			12.8533	0.0763932			12.8582	0.147846			12.8575
									12.8615	0.0119768			12.8666	0.0892329			12.8612	0.0763947					12.8677	0.186401			12.8631	0.12561			12.867	0.0836455					12.868	0.0279993			12.8612	0.0763947			12.8661	0.148054			12.8654
									12.8694	0.0118022			12.8745	0.0898619			12.8691	0.0763103					12.8756	0.187248			12.871	0.126605			12.8748	0.0838119					12.8759	0.0279611			12.8691	0.0763103			12.874	0.148138			12.8733
									12.8773	0.011786			12.8824	0.090756			12.877	0.0762649					12.8835	0.188227			12.8789	0.127483			12.8827	0.0844194					12.8838	0.0279229			12.877	0.0762649			12.8819	0.148166			12.8811
									12.8852	0.0117697			12.8903	0.0913778			12.8849	0.0762196					12.8914	0.188825			12.8867	0.128254			12.8906	0.0849777					12.8917	0.027926			12.8849	0.0762196			12.8897	0.148194			12.889
									12.8931	0.0116928			12.8981	0.0916736			12.8928	0.0759157					12.8993	0.189404			12.8946	0.128862			12.8985	0.0853219					12.8996	0.0279206			12.8928	0.0759157			12.8976	0.148599			12.8969
									12.901	0.0113993			12.906	0.0922436			12.9007	0.0761851					12.9072	0.190096			12.9025	0.129397			12.9064	0.0854303					12.9075	0.0279153			12.9007	0.0761851			12.9055	0.148974			12.9048
									12.9089	0.0111484			12.9139	0.0930541			12.9086	0.0761942					12.9151	0.190864			12.9104	0.129778			12.9143	0.0855076					12.9154	0.0279167			12.9086	0.0761942			12.9134	0.149047			12.9127
									12.9168	0.0110931			12.9218	0.093515			12.9165	0.0761771					12.923	0.191269			12.9183	0.130668			12.9222	0.0855848					12.9233	0.0279387			12.9165	0.0761771			12.9213	0.149119			12.9206
									12.9247	0.0109728			12.9297	0.0941036			12.9244	0.07616					12.9309	0.191561			12.9262	0.131028			12.9301	0.0860647					12.9311	0.0279428			12.9244	0.07616			12.9292	0.149234			12.9285
									12.9326	0.0106518			12.9376	0.0947778			12.9323	0.0759371					12.9388	0.192272			12.9341	0.131852			12.938	0.0863771					12.939	0.0279468			12.9323	0.0759371			12.9371	0.150518			12.9364
									12.9405	0.0103418			12.9455	0.095362			12.9402	0.0758906					12.9467	0.193222			12.942	0.132928			12.9459	0.0866745					12.9469	0.0279689			12.9402	0.0758906			12.945	0.150647			12.9443
									12.9484	0.0102996			12.9534	0.0960703			12.948	0.0762762					12.9546	0.194102			12.9499	0.133298			12.9538	0.0869719					12.9548	0.0281929			12.948	0.0762762			12.9529	0.150708			12.9522
									12.9563	0.0102574			12.9613	0.0969751			12.9559	0.0762892					12.9625	0.194945			12.9578	0.13454			12.9617	0.0875521					12.9627	0.0282024			12.9559	0.0762892			12.9608	0.15077			12.9601
									12.9642	0.0101678			12.9692	0.097691			12.9638	0.0762388					12.9704	0.195573			12.9657	0.135188			12.9696	0.0877018					12.9706	0.028184			12.9638	0.0762388			12.9687	0.151003			12.968
									12.9721	0.0100688			12.9771	0.0981547			12.9717	0.0761884					12.9783	0.19634			12.9736	0.135338			12.9775	0.0878516					12.9785	0.0281656			12.9717	0.0761884			12.9766	0.150972			12.9759
									12.98	0.0100085			12.985	0.0990685			12.9796	0.0761229					12.9861	0.197509			12.9815	0.136091			12.9854	0.0880692					12.9864	0.0281693			12.9796	0.0761229			12.9845	0.150942			12.9838
									12.9878	0.00994582			12.9929	0.0999241			12.9875	0.0761855					12.994	0.198395			12.9894	0.136924			12.9933	0.0886981					12.9943	0.0282581			12.9875	0.0761855			12.9924	0.1508			12.9917
									12.9957	0.00984181							12.9954	0.0761564									12.9973	0.137585													12.9954	0.0761564							12.9996
[truncated: 3 more columns]
