# Supplementary material for: RNA-directed activation of cytoplasmic dynein-1 in reconstituted transport RNPs
Source: eLife journal article supplement (doi:10.7554/elife.36312), 2018-06-26
Supplement: supp [file elife-36312-supp-v1.zip › elife_poa_e36312_Figure_7_figure_supplement_1_source_data_1.xlsx]

## Sheet: Sheet1
Figure 7 - figure supplement 1B	Fraction of motile Egl puncta TMR + A647	Fraction of motile Egl puncta TMR	Fraction of motile Egl puncta A647
	0.375	0.5	0.125
	0.333333	0.333333	0.333333
	0.875	0.125	0
	0.307692	0.384615	0.307692
	0.529412	0.352941	0.117647
	0.166667	0.5	0.333333
	0.5	0.3	0.2
	0.444444	0.444444	0.111111
	0.25	0.5	0.25
	0.333333	0.416667	0.25
	0.3	0.6	0.1
	0.333333	0.666667	0
	0.5	0.166667	0.333333
	0.583333	0.166667	0.25
	0.363636	0.272727	0.363636
