# Supplementary material for: RNA-directed activation of cytoplasmic dynein-1 in reconstituted transport RNPs
Source: eLife journal article supplement (doi:10.7554/elife.36312), 2018-06-26
Supplement: supp [file elife-36312-supp-v1.zip › elife_poa_e36312_Figure_7_figure_supplement_2_source_data_1.xlsx]

## Sheet: Sheet1
Figure 7 - figure supplement 2B	Fraction hairy puncta Cy3 + Cy5	Fraction hairy puncta Cy3	Fraction hairy puncta Cy5
	0.00920512	0.506558	0.484237
	0.00666108	0.383033	0.610306
	0.0576926	0.461555	0.480752
	0.0425532	0.425532	0.531915
	0.00980209	0.45141	0.538788
	0.04677	0.49115	0.46208
	0.00884558	0.521664	0.46949
	0.0169223	0.622686	0.360391
	0	0.5	0.5
	0.016121	0.610987	0.372892
	0	0.607843	0.392157
