# Supplementary material for: RNA-directed activation of cytoplasmic dynein-1 in reconstituted transport RNPs
Source: eLife journal article supplement (doi:10.7554/elife.36312), 2018-06-26
Supplement: supp [file elife-36312-supp-v1.zip › elife_poa_e36312_Figure_7_figure_supplement_3_source_data_1.xlsx]

## Sheet: Sheet1
Figure 7 - figure supplement 3A	RNA velocity bin center (μm sec-1; frequency distribution)	Frequency of RNA velocity Cy3 + Cy5 (dual)	Frequency of RNA velocity Cy3 or Cy5 (single)	RNA velocity Cy3 + Cy5 (dual) (μm sec-1; raw values)	RNA velocity Cy3 or Cy5 (single) (μm sec-1; raw values)		Figure 7 - figure supplement 3B	RNA run length bin center (μm; 1-cumulative frequency distribution)	1-cumulative frequency of RNA run length Cy3 + Cy5 (dual)	1-cumulative frequency of RNA run length Cy3 or Cy5 (single)	RNA run length Cy3 + Cy5 (dual) (μm; raw, unfitted values)	RNA run length Cy3 or Cy5 (single) (μm; raw, unfitted values)
	0	0.0555556	0.0552764	0.764341	0.274331			0	1	1	2.73	5.145
	0.1	0.266667	0.261307	1.2348	0.230084			1	0.932203	0.772	10.08	0.735
	0.2	0.111111	0.183417	0.16464	0.2058			2	0.79661	0.596	6.3	2.94
	0.3	0.111111	0.100503	1.029	0.28812			3	0.627119	0.4	1.995	7.14
	0.4	0.0666667	0.0477387	0.631189	0.8232			4	0.542373	0.348	4.305	6.3
	0.5	0.0444444	0.0552764	0.441029	0.15682			5	0.423729	0.264	1.995	3.36
	0.6	0.0555556	0.0753769	0.0629748	0.197568			6	0.237288	0.204	7.455	2.52
	0.7	0.1	0.0552764	0.122245	0.0858186			7	0.169492	0.16	2.94	0.945
	0.8	0.0555556	0.0552764	0.0310758	0.148176			8	0.169492	0.148	2.94	5.145
	0.9	0.0333333	0.0427136	0.635305	0.168344			9	0.101695	0.112	5.67	1.47
	1	0.0555556	0.0226131	0.384229	0.36015			10	0.0677966	0.068	5.25	6.405
	1.1	0.0111111	0.0251256	0.4116	0.0456876			11	0.0169492	0.028	5.88	1.155
	1.2	0.0333333	0.00753769	0.74088	0.2058			12	0.0169492	0.02	4.725	4.515
	1.3	0	0.00251256	0.151675	0.0882882			13	0	0.016	11.34	1.47
	1.4	0	0.00502513	0.137269	0.263012			14	0	0	8.715	4.62
	1.5	0	0	0.025725	0.129654			15	0	0	4.41	3.675
	1.6	0	0	0.12348	0.06174						6.09	3.99
	1.7	0	0.00251256	0.19942	0.112161						10.815	2.625
	1.8	0	0.00251256	0.32146	0.24696						4.095	4.305
	1.9	0	0	0.0675024	0.06174						13.335	0.945
				0.145295	0.190365						5.46	0.735
				0.24696	0.4116						2.52	7.35
				0.335866	0.101048						3.255	9.765
				0.2058	0.11566						2.1	2.415
				0.047334	0.14159						5.775	0.63
				0.24943	0.158054						8.82	6.93
				0.7203	0.0640038						1.785	1.89
				0.70219	0.754669						1.47	10.815
				0.0876708	0.800356						9.135	2.835
				0.583031	0.22638						1.995	10.71
				0.685931	0.168344						7.14	5.04
				0.334425	0.0744996						3.255	1.575
				0.422507	0.703219						6.09	10.92
				0.797475	0.3087						4.515	9.03
				0.52232	0.160112						3.255	4.83
				0.86436	0.464696						2.94	2.1
				0.155138	0.2058						3.57	0.945
				0.252771	0.55566						9.555	2.205
				0.709289	0.583031						4.41	5.355
				1.17222	0.526025						1.575	4.83
				0.28959	0.788831						4.935	2.73
				0.689431	0.06174						0.525	2.73
				1.03425	0.300056						1.05	2.94
				0.914484	0.303761						5.88	6.615
				0.121214	0.529112						11.13	1.47
				0.689431	0.28812						1.365	1.995
				0.0459207	0.6174						3.255	2.415
				0.666471	0.0911694						3.465	1.365
				0.45507	0.467166						6.195	3.15
				0.33096	0.9261						7.245	9.45
				0.127443	0.0969318						6.09	1.47
				0.585862	0.0605052						9.135	1.89
				0.753637	0.108457						5.355	9.765
				0.89397	0.0983724						6.3	0.63
				0.277131	0.651769						1.575	7.56
				0.44553	0.74088						5.67	3.99
				0.0939708	0.32681						2.415	3.255
				0.0993762	0.124921						7.35	1.575
				0.245738	0.230084						5.145	2.52
				0.122245	0.4116							2.1
				1.18254	0.788831							0.63
				0.793762	0.142002							0.63
				0.135551	0.37044							5.67
				0.61081	0.28812							11.655
				0.0648648	0.954089							2.625
				0.0945945	0.025725							5.04
				0.187734	0.1313							2.1
				1.10187	0.26754							6.405
				0.0555093	0.2058							12.915
				0.12474	0.168344							1.68
				0.537006	0.480131							1.155
				0.159459	0.7203							11.025
				0.534511	0.192011							1.575
				0.655717	0.122245							6.3
				0.138669	0.5145							6.195
				0.285863	0.891731							1.26
				0.106445	0.891731							8.82
				0.0594594	0.12101							1.995
				1.00478	0.235229							3.045
				0.951974	0.525202							3.465
				0.135967	0.125332							7.455
				0.271933	0.323312							2.73
				0.0762993	0.0368382							3.465
				0.10395	0.376408							2.31
				0.0363825	0.12348							3.045
				0.0875259	0.24696							1.155
				0.80187	0.0777924							9.87
				0.95634	0.6174							2.205
				0.274636	0.0788214							2.625
				0.377339	0.579944							2.625
					0.385875							8.715
					0.214649							2.835
					1.029							1.785
					0.077175							1.575
					0.12348							3.045
					1.15762							1.89
					0.37044							0.84
					0.32146							1.575
					0.0685314							9.555
					0.632629							3.36
					0.282975							10.71
					0.261983							1.68
					0.6174							11.235
					0.0588588							1.89
					0.448438							3.78
					0.599495							1.365
					0.8232							6.72
					0.8232							14.49
					1.1319							1.785
					0.094668							9.03
					0.74088							14.385
					0.78204							10.185
					0.320225							3.255
					0.0434238							3.36
					0.289561							2.52
					0.90552							14.28
					0.714332							10.5
					0.0726474							5.88
					0.3087							3.36
					0.673583							1.68
					0.364883							4.515
					0.0909636							2.205
					0.11319							4.62
					0.6174							1.995
					0.52232							0.63
					0.696633							1.365
					1.11132							0.945
					0.151675							6.825
					0.274331							4.2
					0.485071							0.735
					0.646829							2.205
					0.1029							0.945
					0.45276							9.975
					0.08232							5.88
					0.0376614							9.45
					0.137269							4.725
					0.128625							6.72
					0.077175							10.5
					0.0989898							0.63
					0.14406							10.605
					0.282975							0.525
					0.459621							3.57
					1.18463							4.2
					0.0591591							5.565
					0.594694							2.625
					0.0426111							14.385
					0.129281							6.72
					0.0817057							1.05
					0.0918414							3.255
					0.155138							7.665
					0.148932							3.15
					0.551669							6.09
					0.775687							9.345
					0.252771							3.99
					0.185131							1.995
					0.283384							2.31
					0.135073							1.05
					0.241394							1.05
					0.307379							1.68
					0.316274							2.415
					0.0788099							2.94
					0.230638							3.465
					0.062055							2.31
					0.0897729							1.68
					0.672262							5.25
					1.01832							2.52
					0.632134							1.68
					0.653232							1.26
					0.792856							0.735
					0.319583							4.83
					0.275731							4.725
					0.20685							2.205
					0.448244							4.725
					0.20685							0.63
					0.396531							6.09
					0.337166							1.05
					0.174995							3.99
					0.916139							1.785
					0.945511							10.08
					0.8274							4.62
					1.00467							5.985
					1.14926							6.3
					0.723975							4.305
					0.113974							9.975
					0.0446796							1.575
					0.945511							3.99
					0.118111							1.47
					0.62055							3.045
					0.24822							3.465
					0.118111							1.365
					0.0105494							8.715
					0.0320617							1.155
					0.118111							0.84
					0.016548							2.31
					0.20685							1.26
					0.879112							1.26
					0.33096							12.18
					0.86877							3.465
					0.517125							1.785
					0.262079							3.15
					0.12411							0.84
					0.896281							1.26
					0.20685							0.84
					0.0997017							3.36
					0.0295795							3.255
					0.4137							2.73
					0.112733							2.52
					0.145209							6.09
					0.723975							2.625
					1.44795							2.1
					0.0775688							1.575
					0.70329							2.73
					0.59759							2.625
					0.551669							2.625
					0.482581							2.1
					0.107355							1.575
					0.243256							7.875
					0.775687							1.47
					0.594694							5.46
					0.77093							1.26
					0.161343							1.155
					0.0713633							1.26
					0.130936							10.29
					0.62055							10.71
					0.317101							0.63
					0.155138							1.05
					0.79782							9.87
					1.02039							9.45
					0.115009							1.26
					0.0901866							0.63
					1.03425							1.05
					0.180994							5.355
					0.225673							6.3
					0.268905							7.35
					0.0556427							1.365
					1.03425							1.26
					0.13135							1.05
					0.187406							1.68
					0.155138							2.73
					0.574629							5.355
					0.517125							0.945
					0.20685							3.99
					0.155138							3.15
					0.888214							2.94
					0.62055							9.765
					0.62055							5.25
					1.09072							6.51
					1.11699							2.73
					0.16548							0.63
					0.672262							2.94
					0.26332
					0.302415
					0.187199
					0.187199
					1.13767
					0.20685
					0.517125
					0.66192
					1.18939
					0.965369
					1.70651
					0.91014
					1.10313
					0.66192
					0.35723
					0.44328
					0.0812921
					0.23643
					0.8274
					0.361988
					0.164865
					0.277131
					0.18711
					0.87318
					0.779625
					0.0733887
					0.57422
					0.129938
					1.12869
					0.504989
					0.110187
					0.485031
					0.154054
					0.56133
					0.0488565
					0.0837837
					0.131393
					0.155925
					0.109979
					0.0397089
					0.642619
					0.109563
					0.155925
					0.114137
					0.31185
					0.04158
					0.554469
					0.718294
					0.138669
					0.0656964
					0.753637
					0.2079
					0.0910602
					0.0871101
					0.352183
					0.762369
					0.0153846
					0.0733887
					1.14345
					0.8316
					0.49896
					0.254054
					0.140748
					0.10395
					0.155925
					0.44553
					0.127443
					0.0218295
					0.11684
					0.0756756
					0.2079
					0.0276507
					0.883575
					0.0692307
					0.0245322
					0.10395
					0.24948
					0.0615384
					0.179834
					0.716008
					1.35135
					0.16632
					0.548024
					0.472557
					0.10395
					0.346569
					0.222661
					0.174428
					0.305821
					0.157588
					0.0567567
					0.16632
					0.6237
					0.820581
					0.485031
					0.164033
					0.22869
					0.600623
					0.24948
					0.152391
					0.226819
					0.683159
					0.22869
					0.655717
					0.85239
					0.551351
					0.113306
					0.129938
					0.6237
					0.147609
					0.93555
					1.31663
					0.277131
					1.80187
					0.8316
					0.17817
					0.138669
					0.173181
					0.148441
					0.70686
					0.2079
					0.59397
					0.970269
					0.117463
					0.4158
					0.51975
					0.0120582
					0.130769
					0.0438669
					0.883575
					0.0850311
					0.29106
					1.07422
					0.779625
					0.181913
					0.135135
					0.127027
					0.16632
					0.101871
					0.04158
					0.2079
					0.072765
					0.70686
					0.389813
					0.25738
					0.10395
					0.158004
					0.0434511
