# Supplementary material for: RNA-directed activation of cytoplasmic dynein-1 in reconstituted transport RNPs
Source: eLife journal article supplement (doi:10.7554/elife.36312), 2018-06-26
Supplement: supp [file elife-36312-supp-v1.zip › elife_poa_e36312_Figure_7_source_data_1.xlsx]

## Sheet: Sheet1
Figure 7C	Fraction motile BICD2 puncta TMR + A647	Fraction motile BICD2 puncta TMR	Fraction motile BICD2 puncta A647		Figure 7E	Fraction motile Egl puncta TMR + A647	Fraction motile Egl puncta TMR	Fraction motile Egl puncta A647		Figure 7G	Fraction motile hairy puncta Cy3 + Cy5	Fraction motile hairy puncta Cy3	Fraction motile hairy puncta Cy5
	0.368421	0.342105	0.289474			0.431034	0.293103	0.275862			0.146341	0.365854	0.487805
	0.472727	0.2	0.327273			0.342857	0.342857	0.314286			0.136364	0.386364	0.477273
	0.365079	0.301587	0.333333			0.44	0.3	0.26			0.0895522	0.41791	0.492537
	0.397059	0.308824	0.294118			0.55102	0.265306	0.183673			0.0909091	0.363636	0.545455
	0.5	0.285714	0.214286			0.377358	0.245283	0.377358			0.108108	0.459459	0.432432
	0.304348	0.413043	0.282609			0.342857	0.342857	0.314286			0.0877193	0.385965	0.526316
	0.410714	0.339286	0.25			0.327586	0.37931	0.293103			0.12987	0.376623	0.493506
	0.333333	0.366667	0.3			0.373626	0.252747	0.373626			0.111111	0.444444	0.444444
	0.382353	0.294118	0.323529			0.288136	0.440678	0.271186			0.108108	0.324324	0.567568
	0.387097	0.451613	0.16129			0.333333	0.392157	0.27451			0.137931	0.448276	0.413793
	0.447917	0.322917	0.229167			0.392857	0.321429	0.285714			0.118421	0.394737	0.486842
	0.367347	0.408163	0.22449			0.22807	0.403509	0.368421			0.212121	0.393939	0.393939
	0.387097	0.322581	0.290323			0.380952	0.357143	0.261905			0.166667	0.428571	0.404762
	0.423077	0.346154	0.230769			0.387755	0.367347	0.244898			0.170213	0.255319	0.574468
	0.382353	0.205882	0.411765			0.416667	0.166667	0.416667			0.234043	0.319149	0.446809
	0.348837	0.27907	0.372093
	0.392857	0.357143	0.25
