# Supplementary material for: RNA-directed activation of cytoplasmic dynein-1 in reconstituted transport RNPs
Source: eLife journal article supplement (doi:10.7554/elife.36312), 2018-06-26
Supplement: supp [file elife-36312-supp-v1.zip › elife_poa_e36312_Supplementary_File_2.docx]

**Supplementary Table 2. Observed outcome of dual labelling experiments with SNAP::BICD2 or Egl::SNAP vs expectation for two SNAP-tagged polypeptides per complex**

| **Signal** | **Observed1 (Mean ± SD) *SNAP::BICD2,***  ***Figure 7C*** | **Observed1 (Mean ± SD) *Egl::SNAP***  ***Figure 7D*** | **Expected2** |
| --- | --- | --- | --- |
| TMR+A647 | 0.3924 ± 0.049 | 0.3743 ± 0.074 | 0.405 |
| TMR | 0.3262 ± 0.066 | 0.3247 ± 0.072 | 0.2025 + 0.09 = 0.2925 |
| A647 | 0.2814 ± 0.062 | 0.3010 ± 0.061 | 0.2025 + 0.09 = 0.2925 |

1 Only motile puncta were analysed

2 See Supplementary Table 1
