# Supplementary figures and images for: RNA-directed activation of cytoplasmic dynein-1 in reconstituted transport RNPs
Source: eLife journal article supplement (doi:10.7554/elife.36312), 2018-06-26

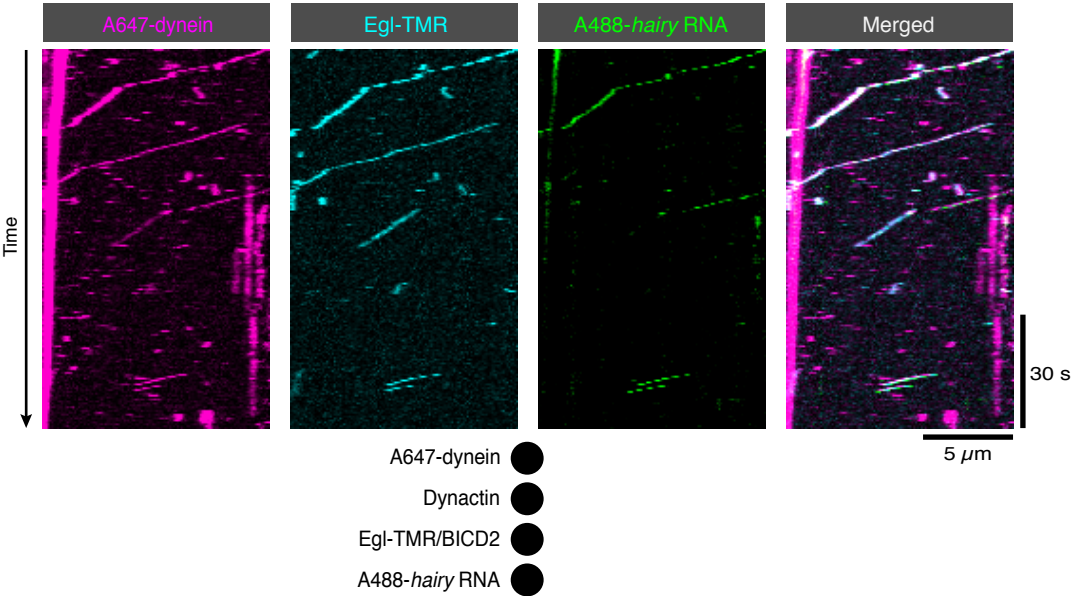

Supplement: supp [file elife-36312-supp-v1.zip]

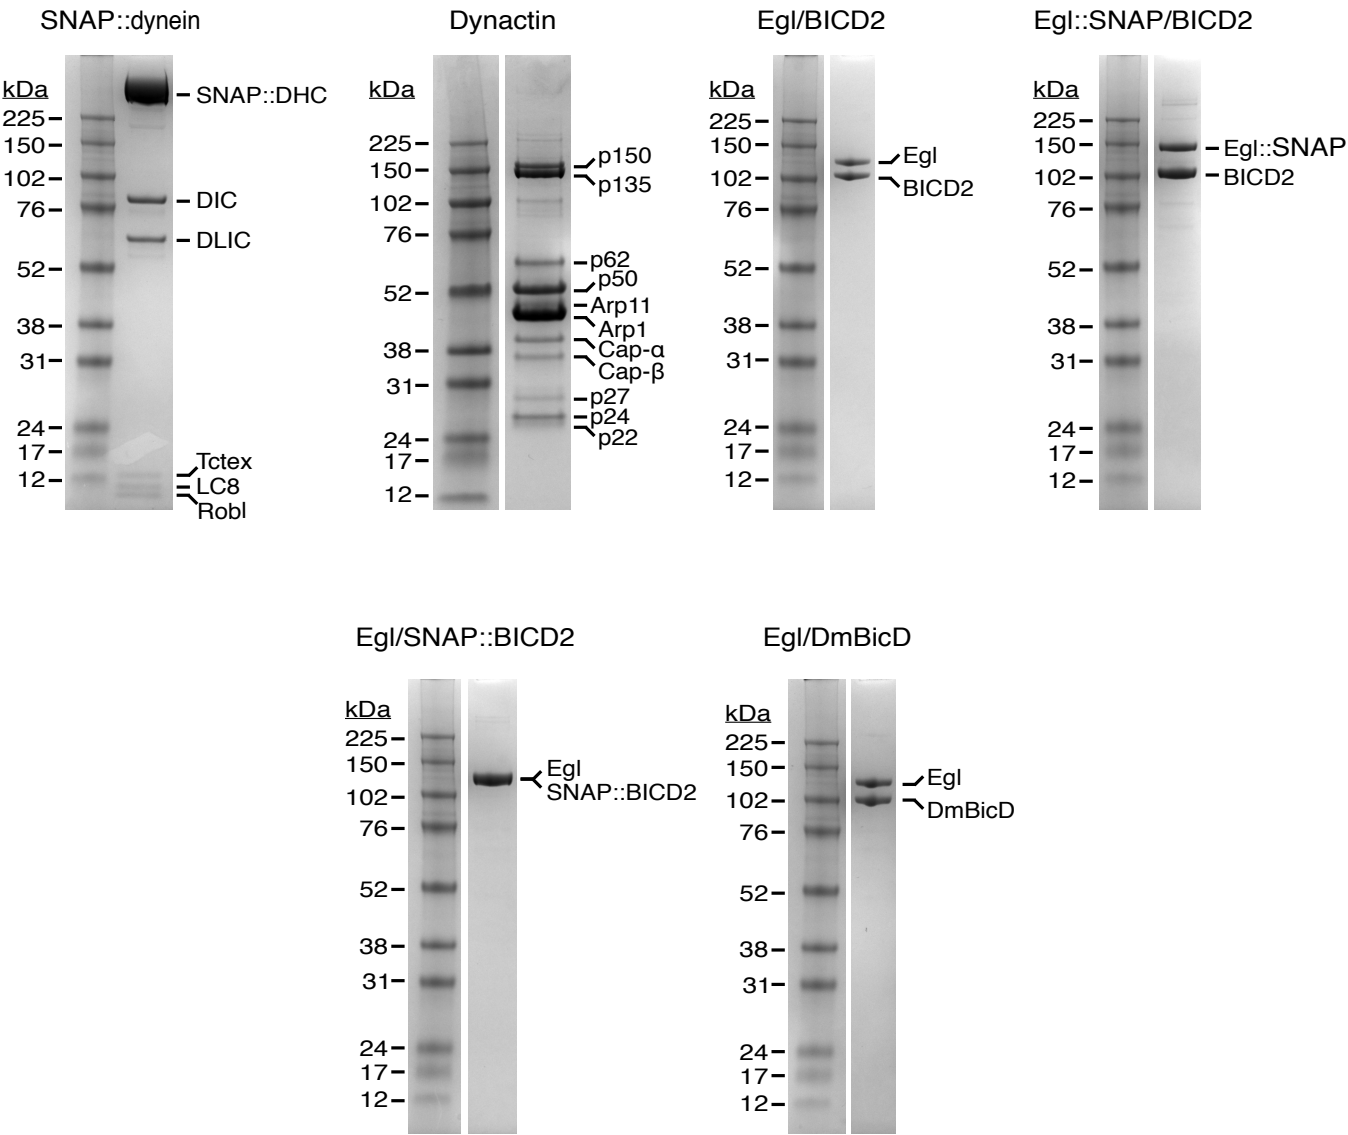

Supplement: supp [file elife-36312-supp-v1.zip]

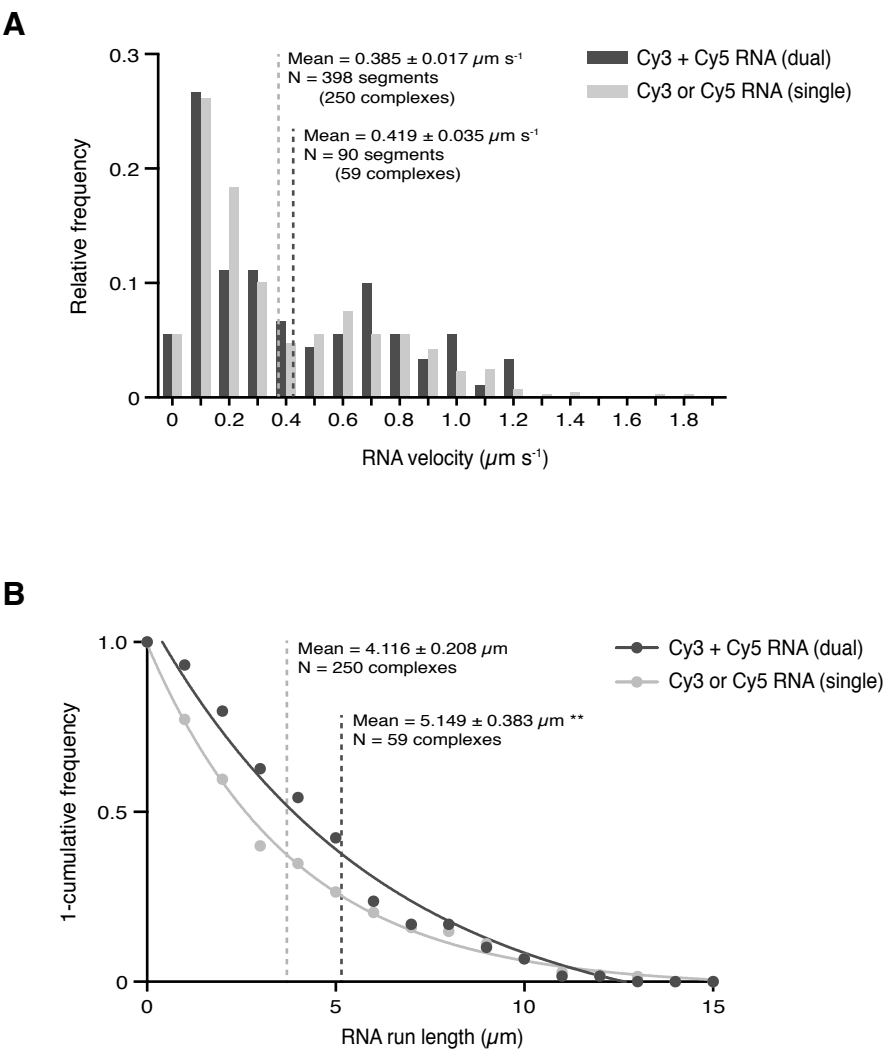

Supplement: supp [file elife-36312-supp-v1.zip]

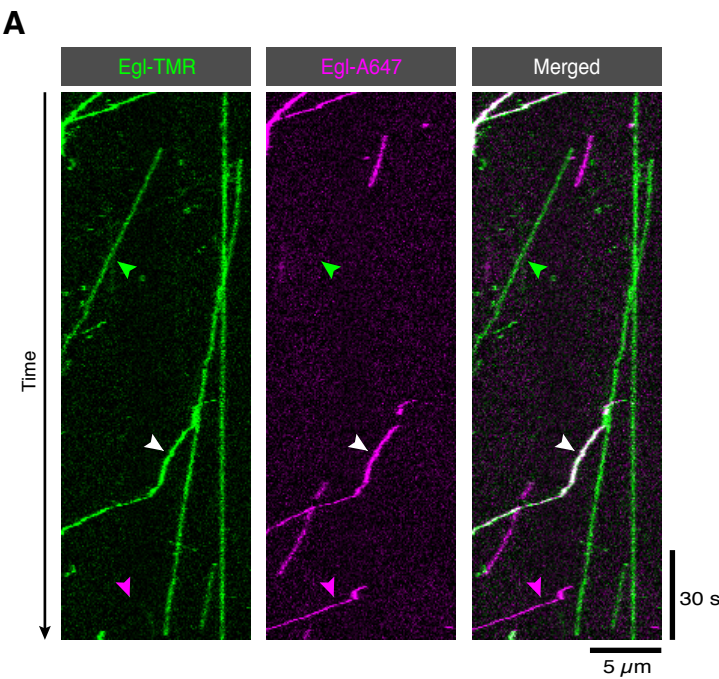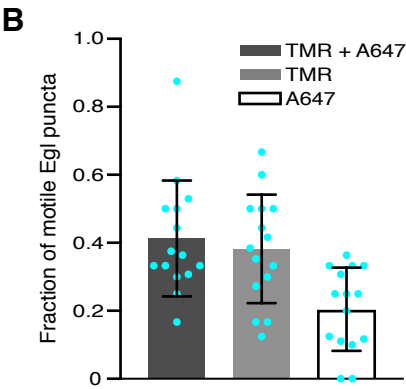

Supplement: supp [file elife-36312-supp-v1.zip]

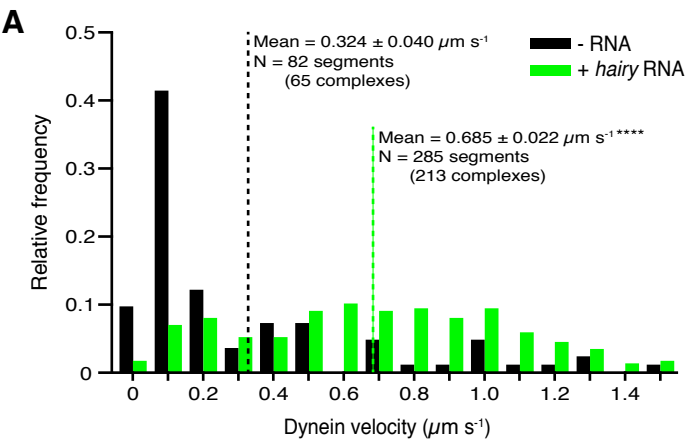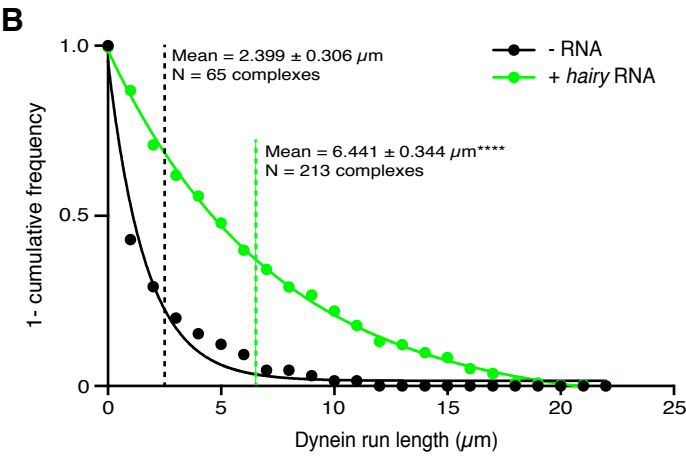

Supplement: supp [file elife-36312-supp-v1.zip]

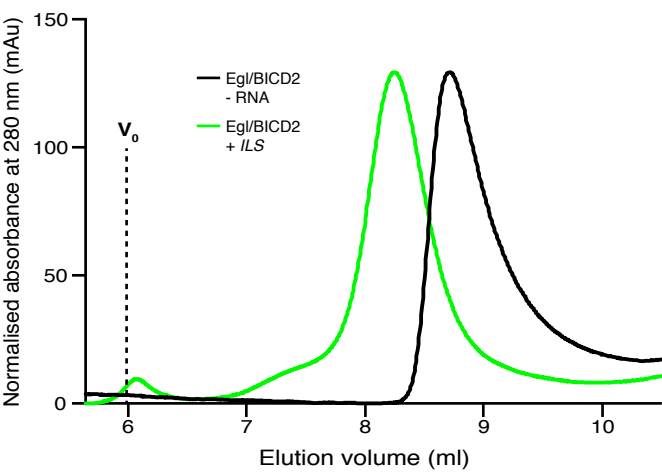

Supplement: supp [file elife-36312-supp-v1.zip]

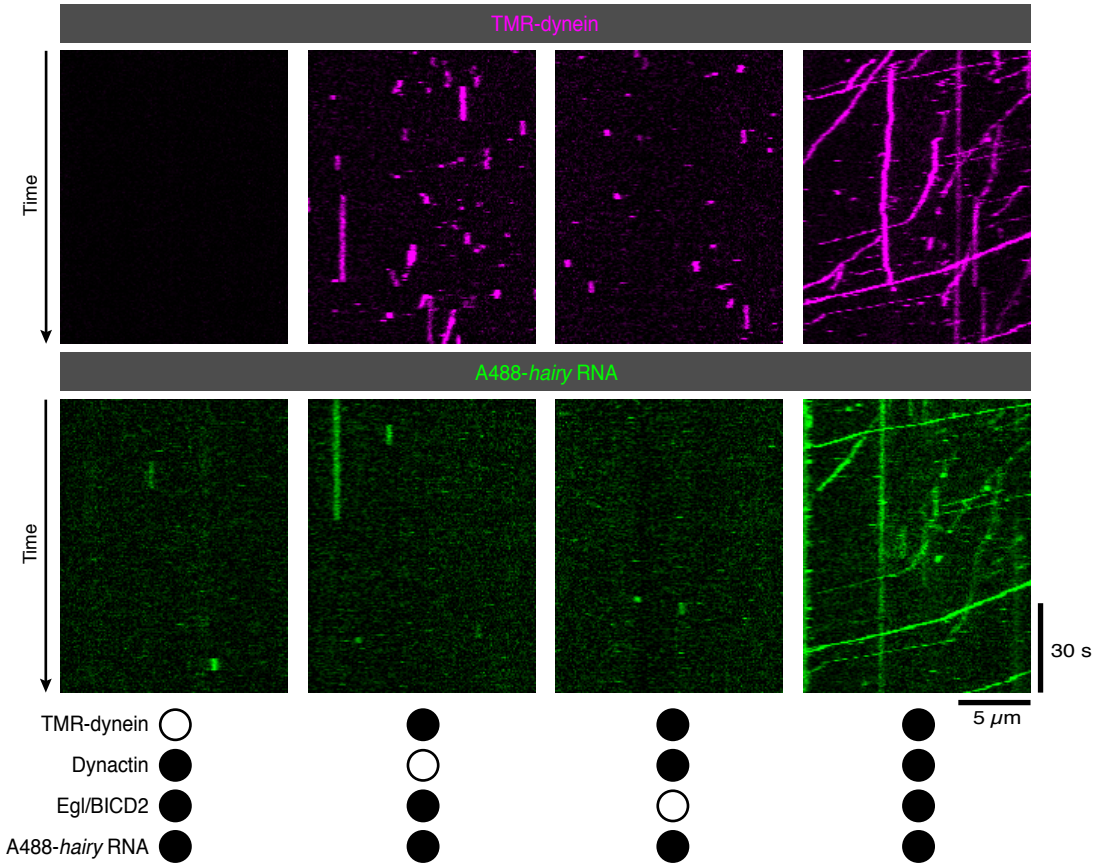

Supplement: supp [file elife-36312-supp-v1.zip]

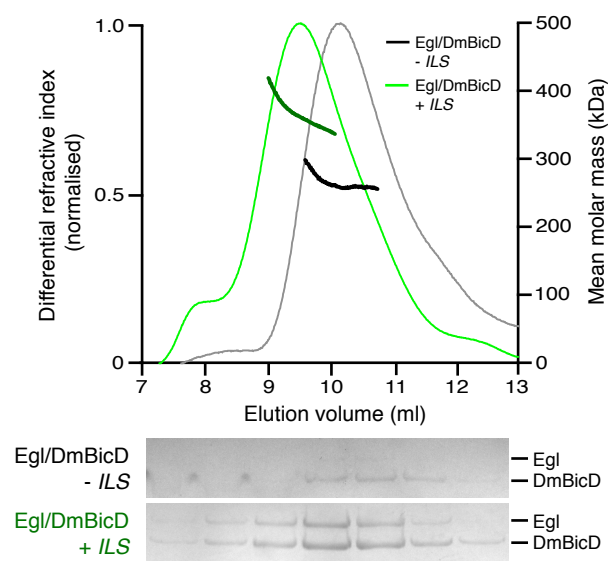

Supplement: supp [file elife-36312-supp-v1.zip]

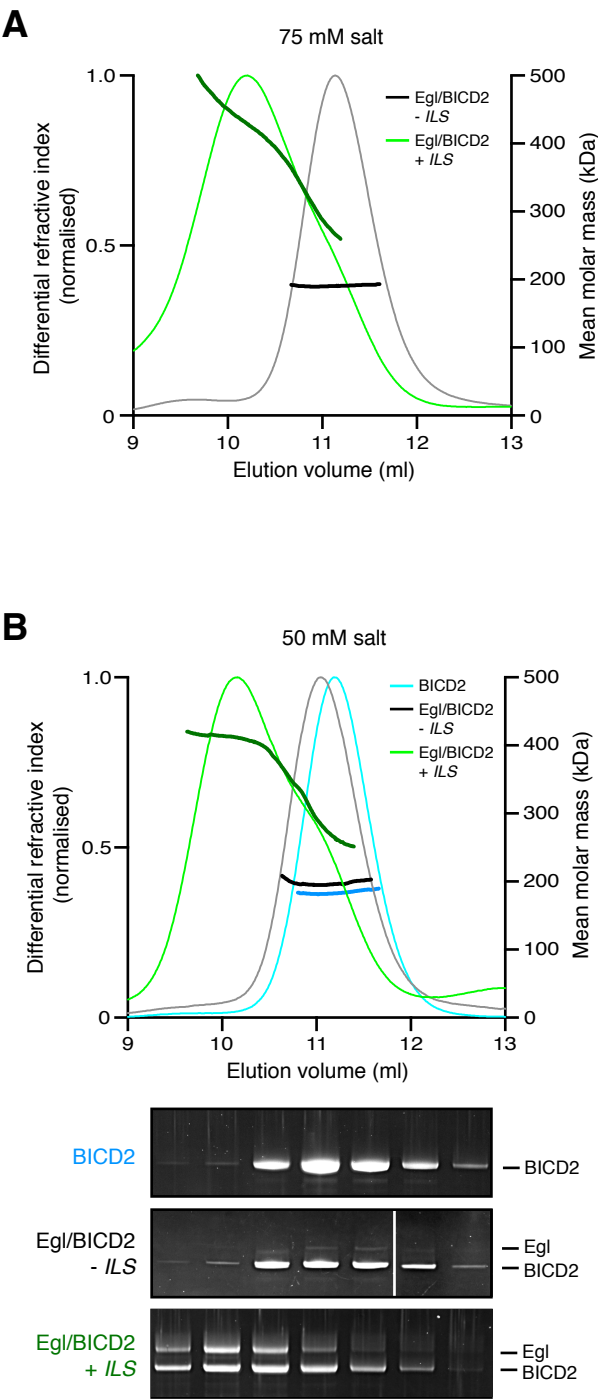

Supplement: supp [file elife-36312-supp-v1.zip › elife_poa_e36312_Figure_6_figure_supplement_4.pdf]

**A**

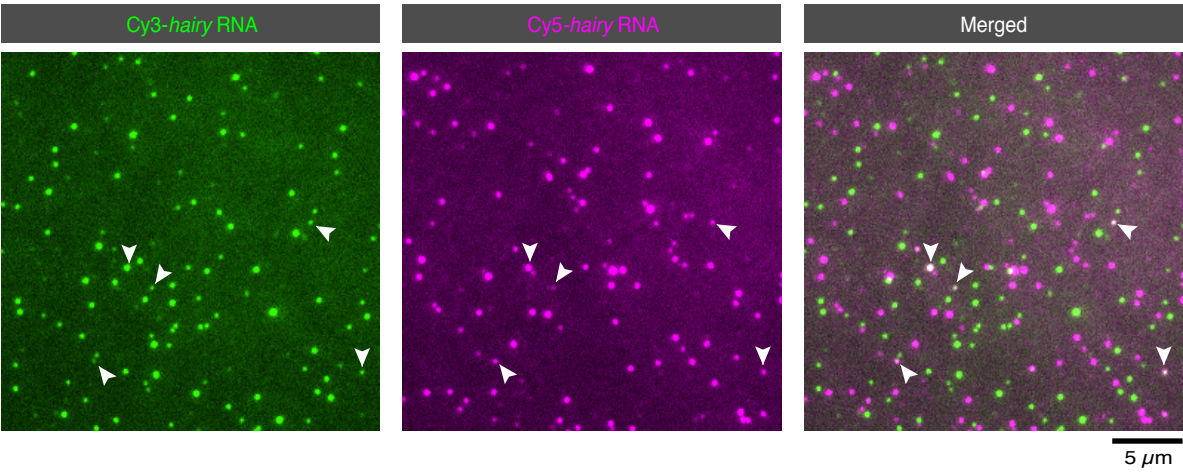

**B**

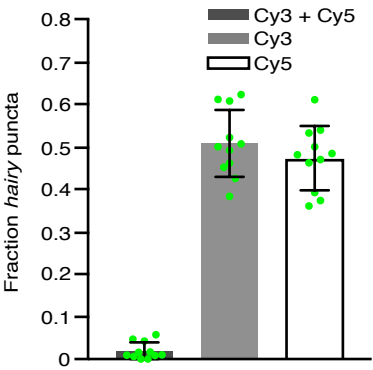

Supplement: supp [file elife-36312-supp-v1.zip › elife_poa_e36312_Figure_7_figure_supplement_2.pdf]

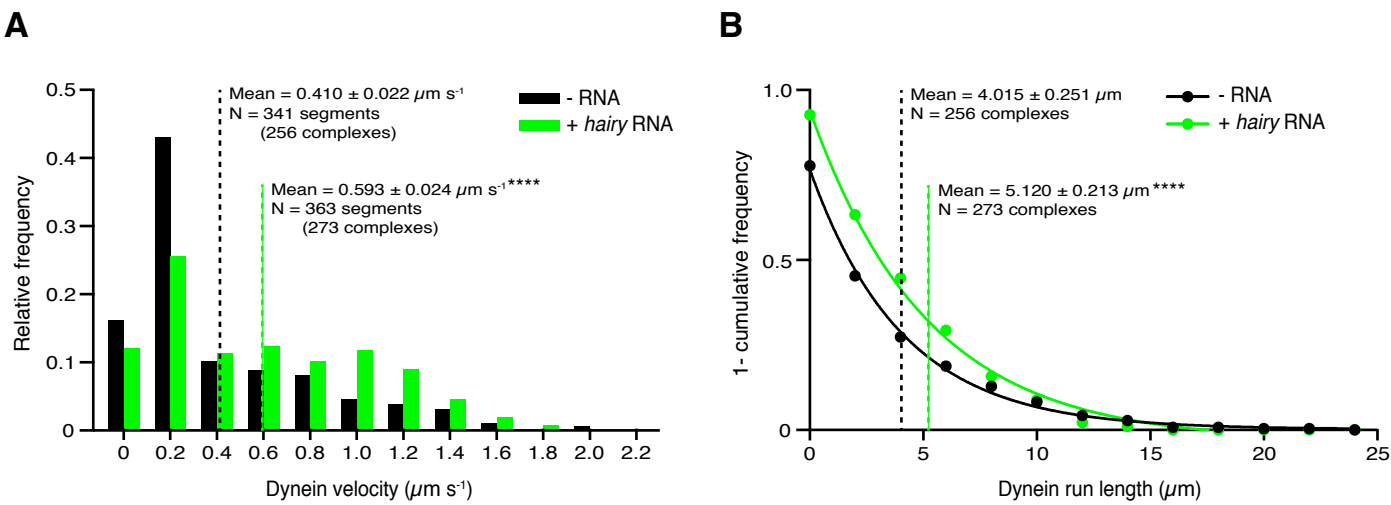

Supplement: supp [file elife-36312-supp-v1.zip › elife_poa_e36312_Figure_5_figure_supplement_1.pdf]

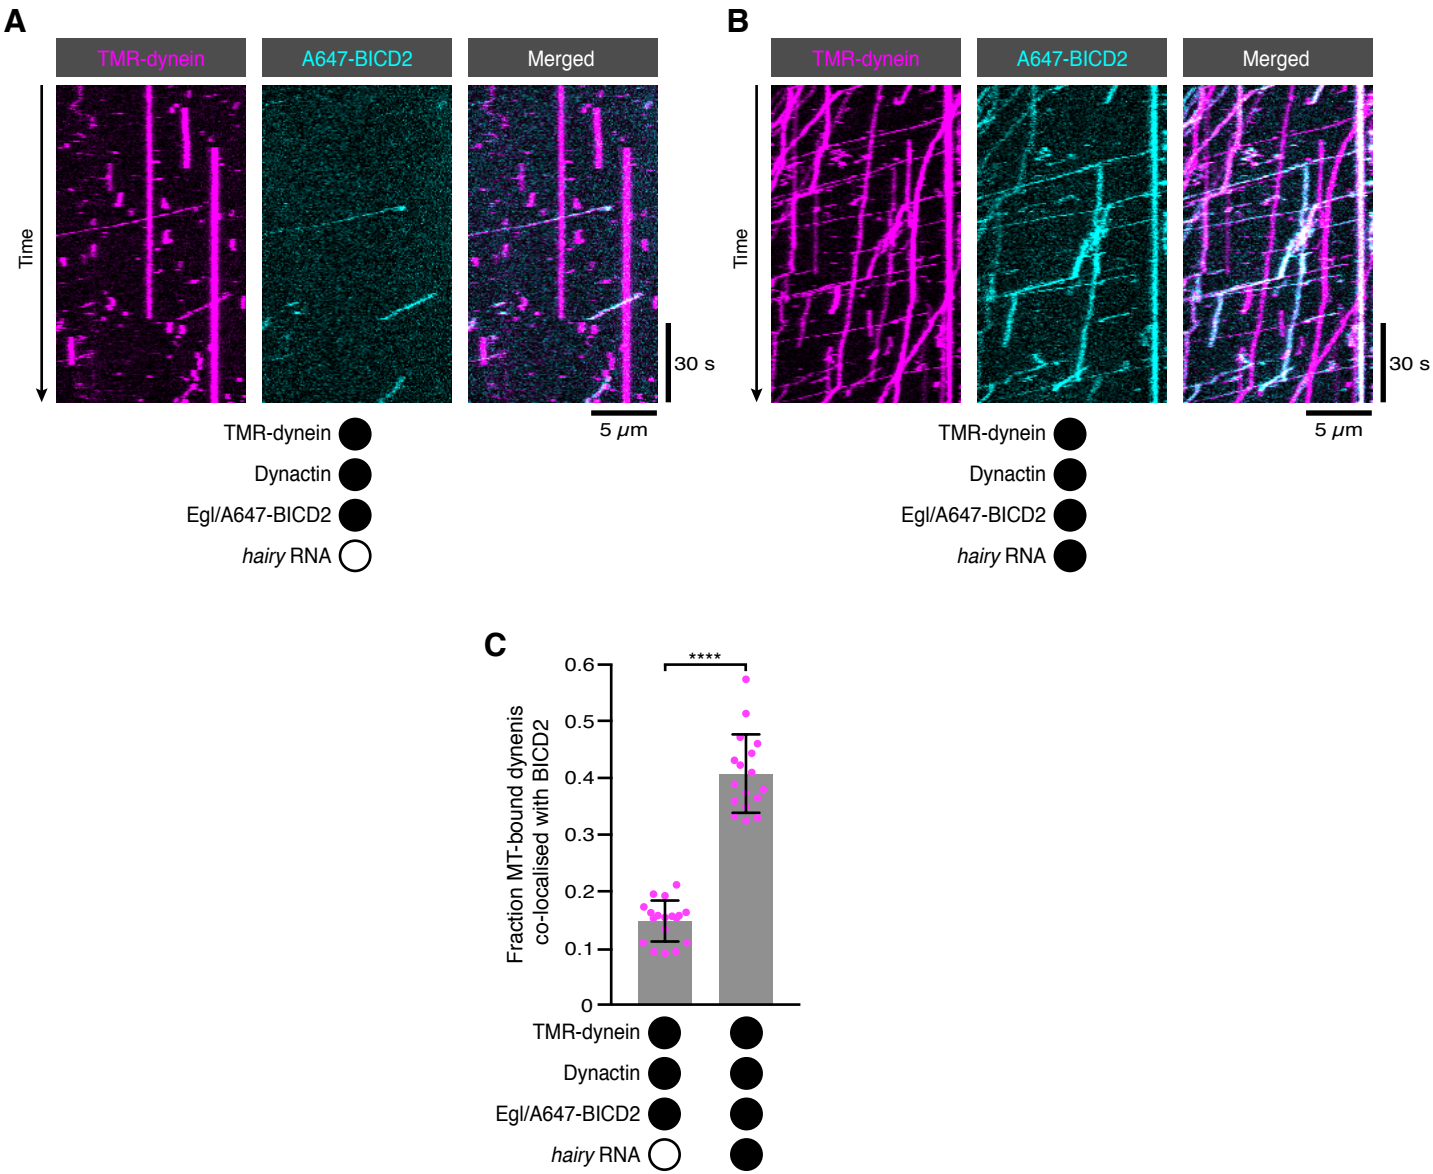

Supplement: supp [file elife-36312-supp-v1.zip › elife_poa_e36312_Figure_4_figure_supplement_1.pdf]

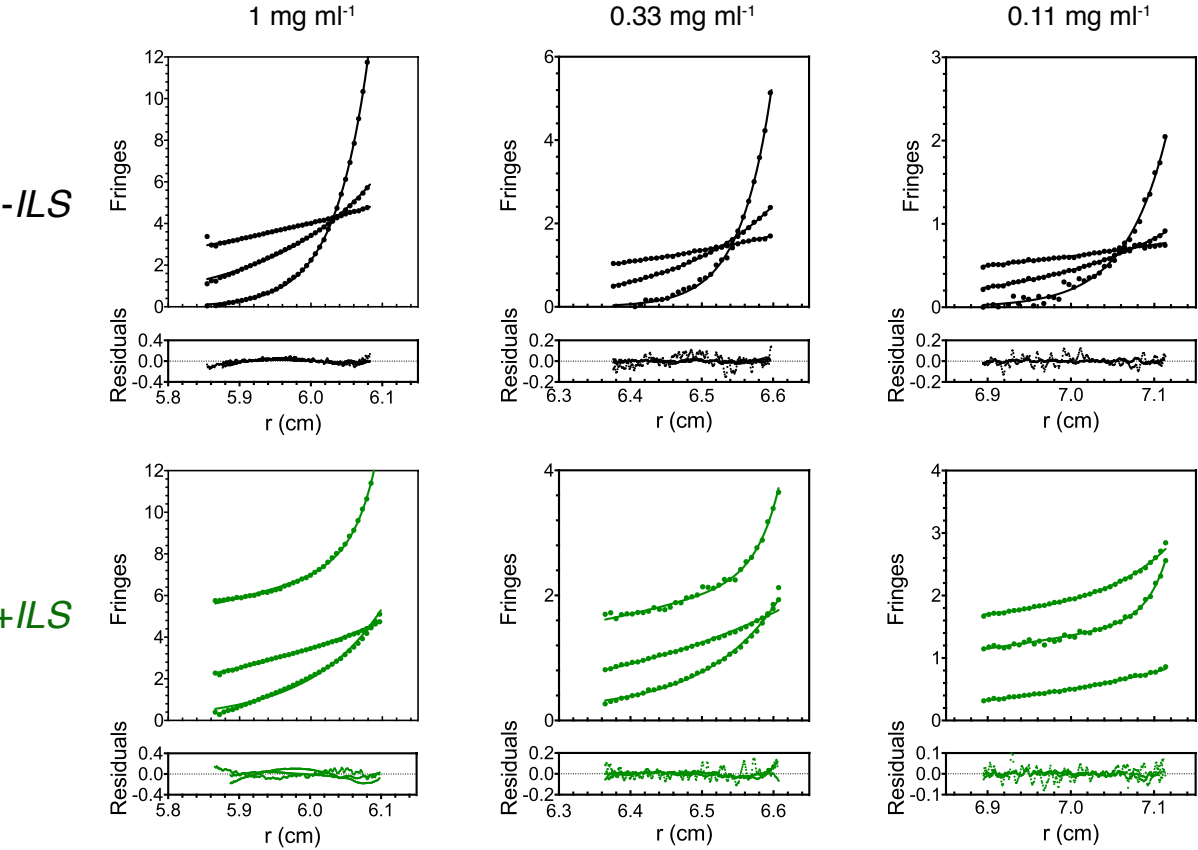

Supplement: supp [file elife-36312-supp-v1.zip › elife_poa_e36312_Figure_6_figure_supplement_2.pdf]

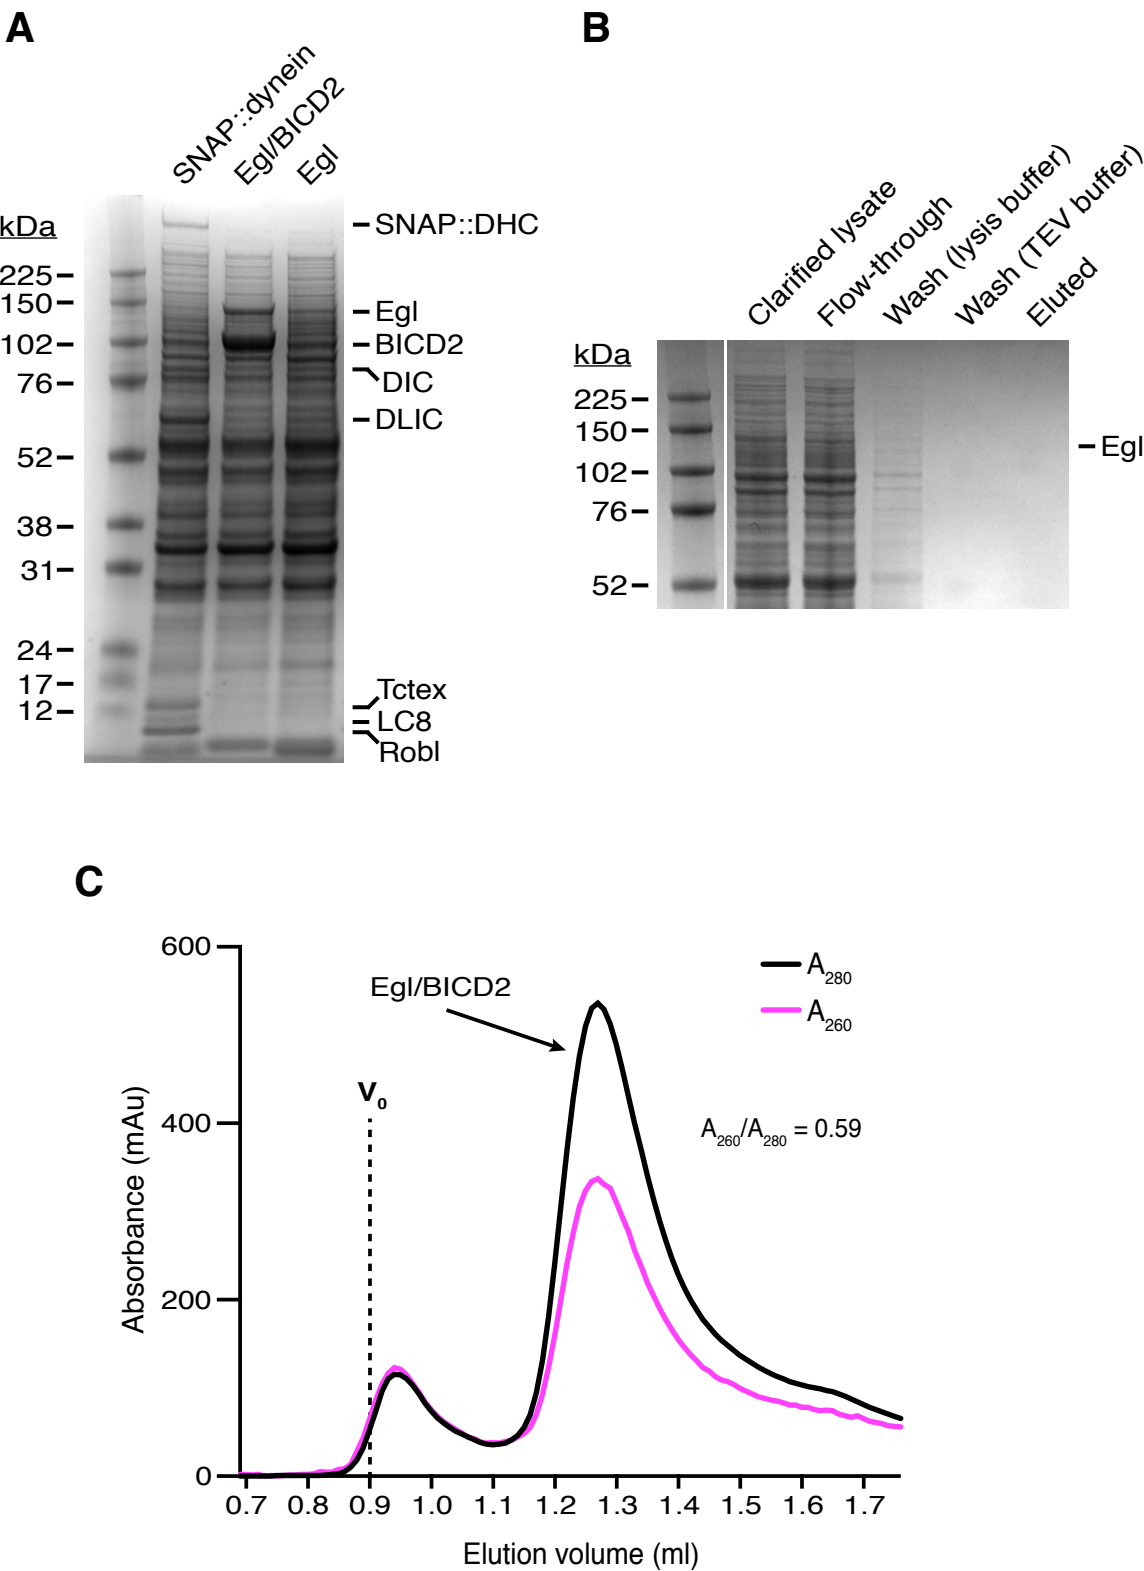

Supplement: supp [file elife-36312-supp-v1.zip › elife_poa_e36312_Figure_1_figure_supplement_2.pdf]

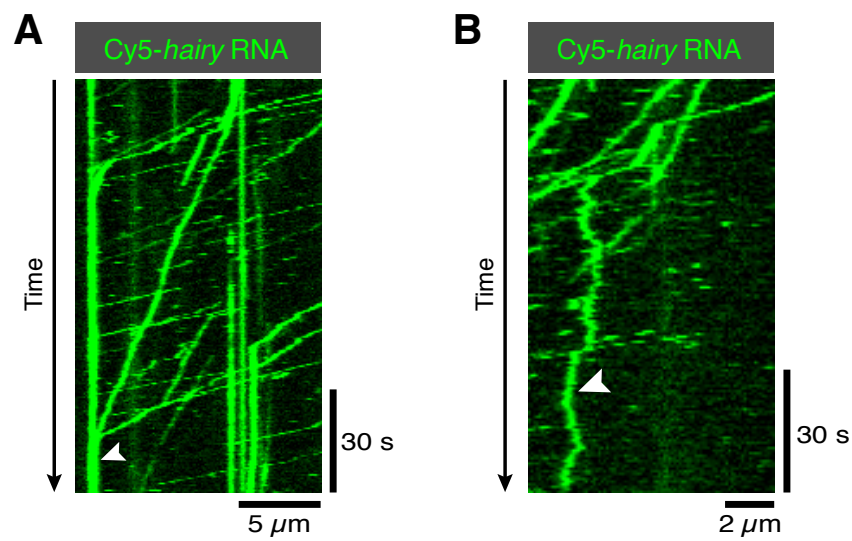

Supplement: supp [file elife-36312-supp-v1.zip › elife_poa_e36312_Figure_1_figure_supplement_4.pdf]

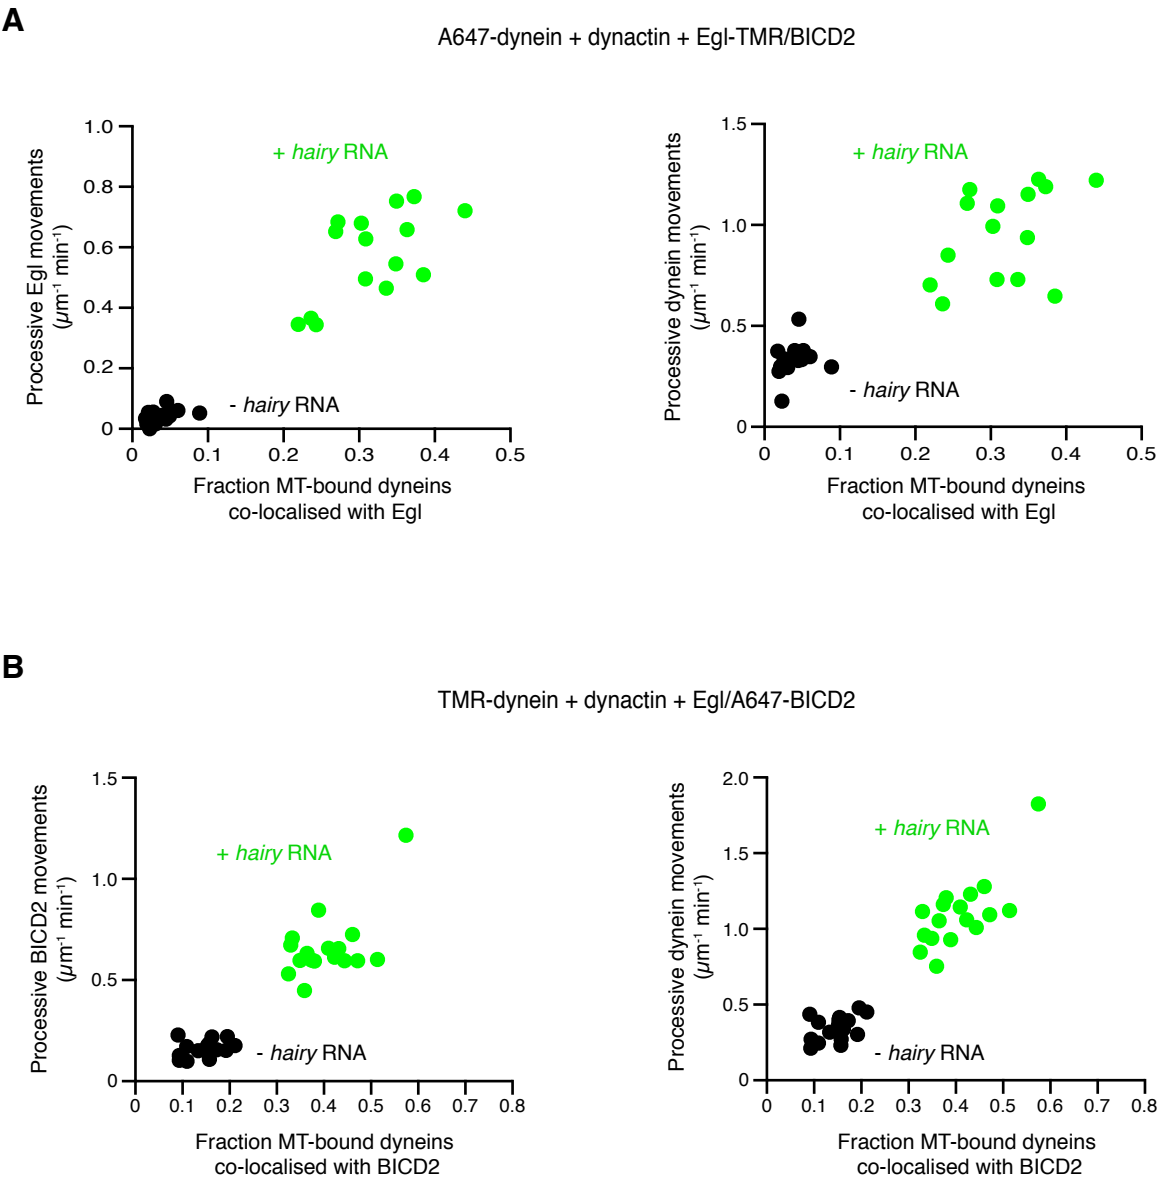

Supplement: supp [file elife-36312-supp-v1.zip › elife_poa_e36312_Figure_4_figure_supplement_2.pdf]

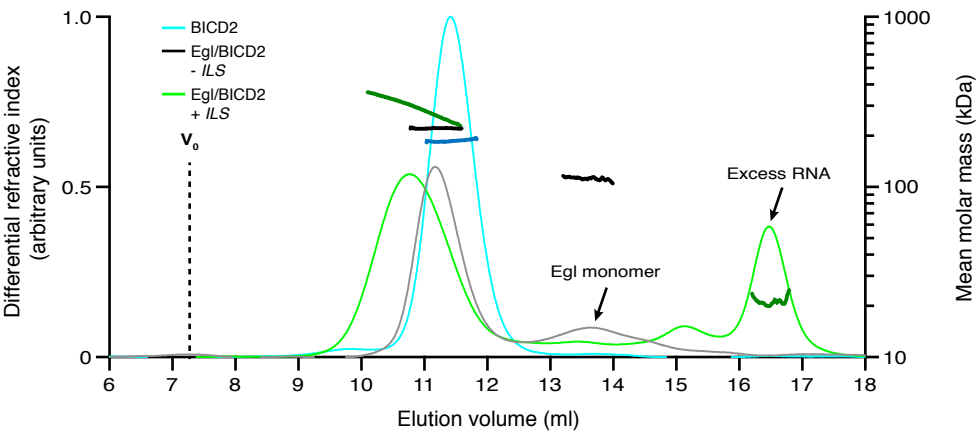

Supplement: supp [file elife-36312-supp-v1.zip › elife_poa_e36312_Figure_6_figure_supplement_3.pdf]
